# Supplementary material for: Оценка устойчивости семейных хозяйств
Source: PeerJ journal article supplement (doi:10.7717/peerj.8911), 2010-01-01

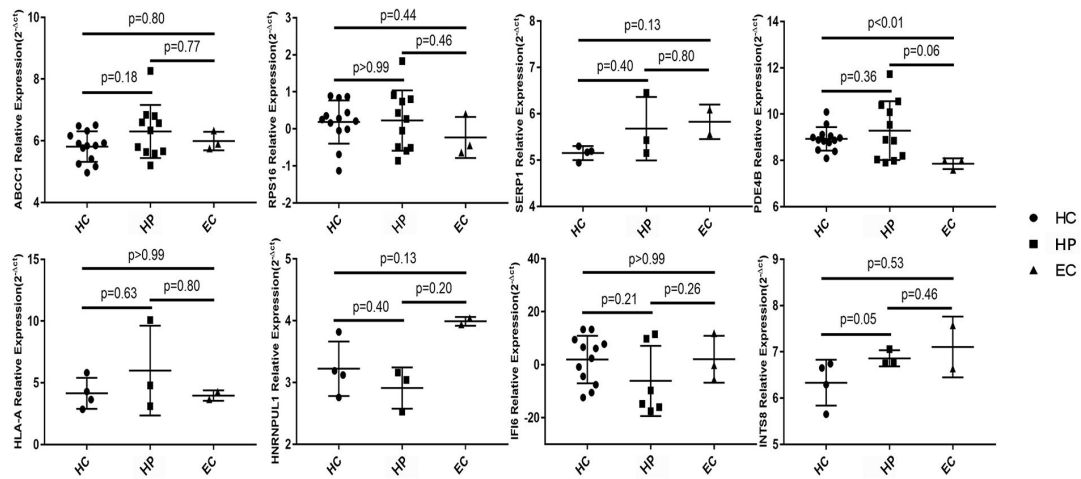

Supplement: Figure_S2.pdf [file Figure_S2.pdf]
