# Supplementary material for: RNA sequencing of CD4 T-cells reveals the relationships between lncRNA-mRNA co-expression in elite controller vs. HIV-positive infected patients
Source: PeerJ. 2020 Apr 21;8:e8911. doi: 10.7717/peerj.8911 (PMC7182024; doi:10.7717/peerj.8911)
Supplement: Table S2 [file peerj-08-8911-s006.xlsx]

## Sheet: all transcripts FPKM
All transcripts FPKM values
Transcript_id	Gene_id	Official_Symbol	Gene_type	HC	HC	EC	EC	HP	HP
ENST00000000233	ENSG00000004059	ARF5	protein_coding	38.5094	43.7832	33.9497	54.1729	41.9899	44.0307
ENST00000000412	ENSG00000003056	M6PR	protein_coding	7.23846	8.70477	5.02395	16.354	5.38663	8.07182
ENST00000000442	ENSG00000173153	ESRRA	protein_coding	5.48729	5.55907	1.28332	16.3334	6.73003	7.13595
ENST00000001008	ENSG00000004478	FKBP4	protein_coding	5.20666	5.42328	3.85494	8.01981	4.08306	7.15984
ENST00000001146	ENSG00000003137	CYP26B1	protein_coding	0	0	0	0.012165	0	0.009782
ENST00000002125	ENSG00000003509	NDUFAF7	protein_coding	6.55782	6.56811	4.22953	2.86899	7.17765	7.47696
ENST00000002165	ENSG00000001036	FUCA2	protein_coding	2.71167	2.4378	1.94055	4.62113	3.04137	3.83695
ENST00000002501	ENSG00000003249	DBNDD1	protein_coding	0	1.42562	0	0.032921	0	1.7032
ENST00000002596	ENSG00000002587	HS3ST1	protein_coding	0	0	0.021296	0.053163	0.024869	0.064295
ENST00000002829	ENSG00000001617	SEMA3F	protein_coding	0.08439	0.044248	0	0	0.01751	0
ENST00000003084	ENSG00000001626	CFTR	protein_coding	0	0	0	0	0	0
ENST00000003100	ENSG00000001630	CYP51A1	protein_coding	6.69636	5.9222	5.85677	6.06201	6.90664	5.81418
ENST00000003302	ENSG00000048028	USP28	protein_coding	1.99905	0.523868	2.59165	0.617044	0.757746	0.389086
ENST00000003583	ENSG00000001460	STPG1	protein_coding	0	0.052758	0	0	0.116665	0
ENST00000003912	ENSG00000001461	NIPAL3	protein_coding	8.19947	8.26095	6.38555	10.9606	6.18999	14.9268
ENST00000004103	ENSG00000002933	TMEM176A	protein_coding	0	0	0	0	0	0
ENST00000004531	ENSG00000003989	SLC7A2	protein_coding	0	0	0	0	0	0
ENST00000004982	ENSG00000004776	HSPB6	protein_coding	0	0	0	0	0	0
ENST00000005082	ENSG00000005801	ZNF195	protein_coding	1.78827	0.355179	1.04855	0	0.101182	0.430575
ENST00000005178	ENSG00000004799	PDK4	protein_coding	0.723418	0.455272	0.163372	1.0653	1.3646	0.345194
ENST00000005180	ENSG00000006606	CCL26	protein_coding	0	0	0	0	0	0
ENST00000005226	ENSG00000006611	USH1C	protein_coding	0	0	0	0	0	0
ENST00000005257	ENSG00000006451	RALA	protein_coding	7.75858	6.52346	6.16306	8.12841	7.2962	10.5822
ENST00000005259	ENSG00000075790	BCAP29	protein_coding	3.03639	0	0.91185	2.48646	1.72241	3.06087
ENST00000005260	ENSG00000006453	BAIAP2L1	protein_coding	0.412542	0.640042	0.42038	0.239111	0.555852	0.413526
ENST00000005284	ENSG00000006116	CACNG3	protein_coding	0	0.02724	0	0.009708	0	0.018348
ENST00000005286	ENSG00000006118	TMEM132A	protein_coding	0.196099	0.092005	0.127141	0.301703	0.157043	0
ENST00000005340	ENSG00000004975	DVL2	protein_coding	5.0228	7.90115	4.81495	8.53569	5.47191	5.56776
ENST00000005374	ENSG00000006625	GGCT	protein_coding	0	0	0	0	0	0
ENST00000005386	ENSG00000005175	RPAP3	protein_coding	6.04964	5.62484	4.94572	4.99547	4.76173	8.77564
ENST00000005558	ENSG00000006652	IFRD1	protein_coding	0	0	0	0	0	0
ENST00000005756	ENSG00000007001	UPP2	protein_coding	0	0	0	0	0	0
ENST00000005995	ENSG00000007038	PRSS21	protein_coding	0.161525	0.249071	0.601566	1.10275	0.953842	1.11072
ENST00000006015	ENSG00000005073	HOXA11	protein_coding	0	0	0	0	0	0
ENST00000006053	ENSG00000006210	CX3CL1	protein_coding	0	0	0	0	0	0
ENST00000006251	ENSG00000186654	PRR5	protein_coding	0	0	0	0	0	0
ENST00000006275	ENSG00000007255	TRAPPC6A	protein_coding	4.15514	10.1116	1.15806	10.4885	2.56487	2.94298
ENST00000006658	ENSG00000006282	SPATA20	protein_coding	6.10325	4.05194	6.87867	4.15831	1.61752	10.0839
ENST00000006724	ENSG00000007306	CEACAM7	protein_coding	0	0	0	0	0	0
ENST00000006750	ENSG00000007312	CD79B	protein_coding	1.90752	4.43267	2.00447	7.02757	2.78628	5.03204
ENST00000006777	ENSG00000005486	RHBDD2	protein_coding	10.29	12.5553	19.9631	12.081	16.7011	7.77214
ENST00000007264	ENSG00000007376	RPUSD1	protein_coding	0.462099	0.227974	0.267345	0.191472	0.027393	0.003456
ENST00000007390	ENSG00000007520	TSR3	protein_coding	15.3993	14.3586	13.4383	28.0784	12.8226	14.1803
ENST00000007414	ENSG00000006025	OSBPL7	protein_coding	10.4356	9.2499	10.5067	17.1562	14.9367	12.1276
ENST00000007510	ENSG00000004777	ARHGAP33	protein_coding	0	0	0	0	0	0
ENST00000007516	ENSG00000004779	NDUFAB1	protein_coding	8.4179	10.431	7.41745	14.8816	6.17206	13.5099
ENST00000007699	ENSG00000006047	YBX2	protein_coding	0	0	0	0	0	0
ENST00000007708	ENSG00000005882	PDK2	protein_coding	0.079994	0.035862	0.031823	0.087582	0.029898	0.013901
ENST00000007722	ENSG00000005884	ITGA3	protein_coding	0	0	0	0	0	0
ENST00000007735	ENSG00000006059	KRT33A	protein_coding	0	0	0	0	0	0
ENST00000007969	ENSG00000010626	LRRC23	protein_coding	0.393112	0.834909	0.756723	0.303423	0.557802	0.34413
ENST00000008180	ENSG00000008517	IL32	protein_coding	16.386	18.6428	28.1849	9.74433	22.2429	24.4268
ENST00000008391	ENSG00000008197	TFAP2D	protein_coding	0	0	0	0	0	0
ENST00000008440	ENSG00000010072	SPRTN	protein_coding	0	0	0	0	0	1.03709
ENST00000008527	ENSG00000008405	CRY1	protein_coding	21.4671	19.8009	22.0355	11.9273	22.4595	12.2223
ENST00000008938	ENSG00000008438	PGLYRP1	protein_coding	0	0	0.066315	0.762225	0.110117	0.068175
ENST00000009041	ENSG00000010270	STARD3NL	protein_coding	2.3224	3.97249	2.34998	4.33401	3.73472	2.61578
ENST00000009105	ENSG00000008118	CAMK1G	protein_coding	0	0	0	0	0	0
ENST00000009180	ENSG00000010278	CD9	protein_coding	0.905522	2.21019	0	0.620302	0.963991	0
ENST00000009530	ENSG00000019582	CD74	protein_coding	26.7743	25.4689	19.4191	62.8231	34.7258	29.6337
ENST00000009589	ENSG00000008988	RPS20	protein_coding	399.206	434.299	406.682	571.642	299.197	330.283
ENST00000010132	ENSG00000010219	DYRK4	protein_coding	0	0	0	0	0	0
ENST00000010299	ENSG00000009780	FAM76A	protein_coding	0.262584	0.216283	0.121499	0.146385	0.126797	0.167556
ENST00000010404	ENSG00000008394	MGST1	protein_coding	0	0	0	0	0	0
ENST00000011292	ENSG00000091704	CPA1	protein_coding	0	0	0	0	0	0
ENST00000011473	ENSG00000008282	SYPL1	protein_coding	0.008163	0	0	0	17.321	0
ENST00000011619	ENSG00000010017	RANBP9	protein_coding	22.9445	24.6134	25.1002	19.6305	21.1847	24.6825
ENST00000011653	ENSG00000010610	CD4	protein_coding	72.4372	83.8143	64.1352	109.409	75.5408	90.8794
ENST00000011684	ENSG00000008323	PLEKHG6	protein_coding	0	0	0	0	0	0
ENST00000011691	ENSG00000008324	SS18L2	protein_coding	20.9584	17.3363	14.0577	17.5734	15.902	18.3863
ENST00000011700	ENSG00000048707	VPS13D	protein_coding	10.8675	0	6.80514	0	0	10.5497
ENST00000011898	ENSG00000011105	TSPAN9	protein_coding	0.573487	0.6309	0.079005	0.066582	0.228694	0.053836
ENST00000011989	ENSG00000186115	CYP4F2	protein_coding	0	0	0	0	0	0
ENST00000012049	ENSG00000011478	QPCTL	protein_coding	2.81129	2.43949	1.78325	3.71201	2.48673	2.32572
ENST00000012134	ENSG00000010818	HIVEP2	protein_coding	0.629717	0.407073	0.605539	0.698815	0.673322	2.14172
ENST00000012443	ENSG00000011485	PPP5C	protein_coding	5.56868	4.84461	0.198163	7.88963	3.16136	5.31585
ENST00000013034	ENSG00000239672	NME1	protein_coding	0.097296	0.025994	0	0	0	0.085865
ENST00000013070	ENSG00000012963	UBR7	protein_coding	5.55095	5.92391	4.67097	6.91407	4.80674	6.66135
ENST00000013125	ENSG00000012983	MAP4K5	protein_coding	9.84259	8.32179	9.34684	4.7611	10.7264	7.90985
ENST00000013222	ENSG00000241644	INMT	protein_coding	0.076193	0.217539	0.289621	0.146222	0.196561	0.152383
ENST00000013807	ENSG00000012061	ERCC1	protein_coding	1.0013	0.417293	0.35671	0.885367	0.444186	0.46559
ENST00000014914	ENSG00000013588	GPRC5A	protein_coding	0.091239	0.039952	0.056685	0.007819	0	0
ENST00000014930	ENSG00000013583	HEBP1	protein_coding	4.2858	3.15459	3.11009	6.21391	3.88882	2.7163
ENST00000014935	ENSG00000013563	DNASE1L1	protein_coding	5.0759	0.810556	2.52629	9.63045	0.001093	1.88657
ENST00000016171	ENSG00000014919	COX15	protein_coding	4.76317	4.49163	4.73271	11.8557	4.47399	8.18529
ENST00000016913	ENSG00000071203	MS4A12	protein_coding	0	0	0	0	0	0
ENST00000016946	ENSG00000015568	RGPD5	protein_coding	15.6695	14.4409	10.8877	2.88558	18.0638	6.34417
ENST00000017003	ENSG00000015532	XYLT2	protein_coding	7.3249	8.44372	7.6969	8.20268	7.00624	9.57177
ENST00000019019	ENSG00000068438	FTSJ1	protein_coding	2.72954	2.56386	1.9769	1.48156	2.63862	0.410343
ENST00000019103	ENSG00000080293	SCTR	protein_coding	0	0	0	0	0	0
ENST00000019317	ENSG00000017797	RALBP1	protein_coding	4.73234	0	2.70318	0	0	0
ENST00000020673	ENSG00000059915	PSD	protein_coding	0	0	0.008907	0.006881	0	0
ENST00000020926	ENSG00000019505	SYT13	protein_coding	0	0	0	0	0	0
ENST00000020945	ENSG00000019549	SNAI2	protein_coding	0	0	0	0	0	0
ENST00000022615	ENSG00000078668	VDAC3	protein_coding	26.2533	24.0138	21.8305	29.5537	25.5207	32.2185
ENST00000023064	ENSG00000021488	SLC7A9	protein_coding	0.130269	0.019059	0.216685	0.092331	0.165913	0.287947
ENST00000023897	ENSG00000022355	GABRA1	protein_coding	0	0	0	0	0	0
ENST00000023939	ENSG00000022277	RTF2	protein_coding	0.094991	0.12322	0.042795	0.107004	0.200056	0.148752
ENST00000024061	ENSG00000022567	SLC45A4	protein_coding	0	0.110268	0	0	0	0
ENST00000025008	ENSG00000023287	RB1CC1	protein_coding	2.15746	1.94748	2.99116	0.802992	2.43653	3.37089
ENST00000025301	ENSG00000023516	AKAP11	protein_coding	23.1596	21.5417	21.6032	17.9737	21.6686	23.8836
ENST00000025399	ENSG00000023734	STRAP	protein_coding	7.48647	7.40906	6.37942	10.3957	10.7151	0.209863
ENST00000026218	ENSG00000007541	PIGQ	protein_coding	0	3.43243	0	4.62089	4.28248	4.51239
ENST00000027335	ENSG00000079112	CDH17	protein_coding	0.025859	0	0.023079	0.060897	0	0
ENST00000029410	ENSG00000027847	B4GALT7	protein_coding	8.29586	6.40783	8.80979	8.88804	8.06385	7.15968
ENST00000031146	ENSG00000029364	SLC39A9	protein_coding	4.35792	3.84748	5.60229	5.511	8.74832	4.31837
ENST00000033079	ENSG00000031003	FAM13B	protein_coding	20.8225	19.1304	19.9448	15.5481	19.3743	20.2136
ENST00000034275	ENSG00000031823	RANBP3	protein_coding	5.23374	2.98673	5.26339	5.01321	2.58925	5.96586
ENST00000035307	ENSG00000033100	CHPF2	protein_coding	12.111	19.4249	13.3347	28.3187	17.5091	22.393
ENST00000035383	ENSG00000033122	LRRC7	protein_coding	0	0.016823	0	0	0	0.000137
ENST00000037243	ENSG00000034713	GABARAPL2	protein_coding	24.1583	28.2575	22.213	30.3651	23.3907	25.4932
ENST00000037502	ENSG00000034971	MYOC	protein_coding	0	0	0	0	0	0
ENST00000037869	ENSG00000035141	FAM136A	protein_coding	8.89709	9.48601	9.67064	9.89877	8.78457	10.014
ENST00000038176	ENSG00000035681	NSMAF	protein_coding	6.15232	7.84714	3.97058	5.8369	6.88012	4.82143
ENST00000039007	ENSG00000036473	OTC	protein_coding	0	0	0.053953	0	0	0
ENST00000039989	ENSG00000052841	TTC17	protein_coding	9.67398	9.90656	9.84302	7.86472	11.3511	9.6534
ENST00000040584	ENSG00000037965	HOXC8	protein_coding	0	0	0	0	0	0
ENST00000040663	ENSG00000037757	MRI1	protein_coding	5.26989	4.51562	5.01693	8.33659	8.36714	5.85227
ENST00000040738	ENSG00000038219	BOD1L1	protein_coding	11.5071	11.6425	13.2907	8.7966	12.3909	12.9882
ENST00000040877	ENSG00000059588	TARBP1	protein_coding	14.8939	13.1555	17.8499	15.5374	15.2937	15.7519
ENST00000042381	ENSG00000039523	RIPOR1	protein_coding	0.215904	1.26225	2.48952	6.34139	4.04927	5.60247
ENST00000042931	ENSG00000039987	BEST2	protein_coding	0	0	0	0	0	0
ENST00000043402	ENSG00000040608	RTN4R	protein_coding	0.271179	0.389318	0.198229	0.204054	0.267991	0.573789
ENST00000044462	ENSG00000041357	PSMA4	protein_coding	7.14892	7.30552	4.22422	4.09108	4.05037	6.85215
ENST00000045083	ENSG00000042062	RIPOR3	protein_coding	0	0	0	0	0	0
ENST00000045347	ENSG00000042317	SPATA7	protein_coding	0	0	0	0.052714	0	0
ENST00000046087	ENSG00000042813	ZPBP	protein_coding	0	0	0	0	0	0
ENST00000046640	ENSG00000040531	CTNS	protein_coding	1.05226	1.63424	1.7211	3.21193	2.04495	3.01874
ENST00000046794	ENSG00000043462	LCP2	protein_coding	23.7326	27.3005	27.0043	44.2196	27.2827	39.6044
ENST00000052569	ENSG00000047932	GOPC	protein_coding	3.83532	6.55813	8.79555	3.27897	1.89407	5.04085
ENST00000052754	ENSG00000011465	DCN	protein_coding	0	0	0	0	0	0
ENST00000053243	ENSG00000048462	TNFRSF17	protein_coding	0	0	0	0.01092	0	0
ENST00000053468	ENSG00000048544	MRPS10	protein_coding	14.1179	11.7756	15.9944	10.1797	13.6782	13.8871
ENST00000053469	ENSG00000048545	GUCA1A	protein_coding	0	0	0	0	0	0
ENST00000053867	ENSG00000030582	GRN	protein_coding	17.0493	20.9693	8.77439	55.2884	20.5497	22.0322
ENST00000054650	ENSG00000041988	THAP3	protein_coding	1.28387	0.832325	1.98167	1.79292	0.668457	0.947793
ENST00000054666	ENSG00000049245	VAMP3	protein_coding	17.6797	18.5258	13.8985	17.09	19.3363	17.1806
ENST00000054668	ENSG00000049247	UTS2	protein_coding	0	0	0	1.68825	0	0
ENST00000054950	ENSG00000049449	RCN1	protein_coding	3.70152	3.43992	2.09273	2.84359	3.96517	3.67962
ENST00000055077	ENSG00000049541	RFC2	protein_coding	3.55105	4.60315	6.43392	3.96022	3.41546	4.54943
ENST00000055335	ENSG00000049769	PPP1R3F	protein_coding	4.18305	6.355	6.77827	9.2107	5.13192	5.50976
ENST00000055682	ENSG00000050030	NEXMIF	protein_coding	0.44658	0.405524	0.222127	0.050199	0.239179	0.326093
ENST00000056217	ENSG00000050327	ARHGEF5	protein_coding	2.53007	4.63353	4.00725	3.07065	6.62918	4.69754
ENST00000056233	ENSG00000050344	NFE2L3	protein_coding	1.95843	2.30803	1.47937	4.57918	1.4628	3.78779
ENST00000057513	ENSG00000050730	TNIP3	protein_coding	0.010222	0.193964	0.202752	0.263685	0.102668	0.172993
ENST00000060969	ENSG00000052723	SIKE1	protein_coding	0.756015	0.569232	0.690337	1.07205	0.460513	0.476346
ENST00000061240	ENSG00000038295	TLL1	protein_coding	0.023164	0.025037	0.022778	0	0	0
ENST00000062104	ENSG00000053438	NNAT	protein_coding	1.22365	0.662337	0.698684	1.08746	0.570451	0.413015
ENST00000064571	ENSG00000054803	CBLN4	protein_coding	0	0	0	0	0	0
ENST00000064724	ENSG00000013297	CLDN11	protein_coding	0.133791	0	0	0.099482	0	0
ENST00000064778	ENSG00000054965	FAM168A	protein_coding	9.14508	10.894	9.55438	9.84884	10.0516	8.48952
ENST00000064780	ENSG00000054967	RELT	protein_coding	10.0106	10.6192	5.44674	28.5325	17.6879	12.4686
ENST00000066544	ENSG00000004897	CDC27	protein_coding	8.69122	8.75575	0	5.58254	0	0
ENST00000070846	ENSG00000057294	PKP2	protein_coding	0	0	0	0	0	0
ENST00000072516	ENSG00000196083	IL1RAP	protein_coding	0.064466	0.017391	0.07885	0	0.008184	0.002367
ENST00000072644	ENSG00000058799	YIPF1	protein_coding	4.9172	5.81313	3.74615	7.47226	3.73805	6.26494
ENST00000072869	ENSG00000133597	ADCK2	protein_coding	8.75529	8.23763	6.29657	12.4521	7.3127	8.72293
ENST00000074304	ENSG00000040933	INPP4A	protein_coding	0.563096	0.391858	0	0	0	0
ENST00000075120	ENSG00000059804	SLC2A3	protein_coding	50.2906	69.6328	55.7932	43.8649	38.9646	36.7365
ENST00000075322	ENSG00000136960	ENPP2	protein_coding	0.140765	0	0.193086	0.133127	0	1.35547
ENST00000075430	ENSG00000060069	CTDP1	protein_coding	16.7557	12.9487	20.3998	19.1358	19.19	15.7804
ENST00000075503	ENSG00000060140	STYK1	protein_coding	0.017988	0.028086	0	0.130125	0.130404	0.018666
ENST00000078429	ENSG00000088256	GNA11	protein_coding	0.577698	0.727168	0.50369	1.05277	0.669476	1.59598
ENST00000078445	ENSG00000060566	CREB3L3	protein_coding	0.037238	0	0	0	0	0.021642
ENST00000078527	ENSG00000060642	PIGV	protein_coding	0	0	1.40697	0.787602	0.06294	0
ENST00000080059	ENSG00000061273	HDAC7	protein_coding	8.73978	23.496	22.1863	27.4488	21.4151	21.9887
ENST00000081029	ENSG00000061794	MRPS35	protein_coding	11.0531	11.2857	8.6939	10.148	11.8632	12.0915
ENST00000083182	ENSG00000062725	APPBP2	protein_coding	9.19	9.35739	9.04372	8.16011	7.76488	9.16979
ENST00000084795	ENSG00000063177	RPL18	protein_coding	601.29	592.023	423.184	468.433	397.274	293.388
ENST00000084798	ENSG00000063180	CA11	protein_coding	2.04858	2.6801	1.71774	1.38006	2.15086	2.15671
ENST00000085068	ENSG00000063241	ISOC2	protein_coding	0.946428	0.374074	0.860496	0.849045	0.261265	0.667437
ENST00000085079	ENSG00000063245	EPN1	protein_coding	2.20101	1.86826	2.08821	4.13354	2.09555	2.27253
ENST00000085219	ENSG00000012124	CD22	protein_coding	0.438919	0.153982	0.166851	0.487749	1.19749	0.470812
ENST00000086933	ENSG00000063515	GSC2	protein_coding	0	0	0	0	0	0
ENST00000155093	ENSG00000067646	ZFY	protein_coding	0.441643	0	0.562044	0	0.217415	0
ENST00000155674	ENSG00000069998	HDHD5	protein_coding	0	0	0.000863	0	0.29886	0.572638
ENST00000155840	ENSG00000053918	KCNQ1	protein_coding	10.5621	12.3964	12.9271	12.3885	8.97995	10.6474
ENST00000155858	ENSG00000070985	TRPM5	protein_coding	0.350169	0.237663	0.458272	0	0.273656	0.262208
ENST00000155926	ENSG00000071575	TRIB2	protein_coding	36.0093	38.21	33.9336	74.5533	32.635	55.6995
ENST00000156084	ENSG00000068308	OTUD5	protein_coding	0.768157	0.0645	0.083362	0.090956	0.114544	0.474109
ENST00000156109	ENSG00000068394	GPKOW	protein_coding	5.87154	5.23136	5.7437	7.81914	5.83659	7.39577
ENST00000156471	ENSG00000021776	AQR	protein_coding	10.8254	10.3015	10.4771	7.2297	9.82421	10.8944
ENST00000156499	ENSG00000129437	KLK14	protein_coding	0	0	0	0	0	0
ENST00000156626	ENSG00000070526	ST6GALNAC1	protein_coding	0.674628	0.865324	0.542474	1.10049	0.550451	1.21221
ENST00000156825	ENSG00000071655	MBD3	protein_coding	0.899721	1.75481	1.01108	3.16421	3.47531	2.45242
ENST00000157600	ENSG00000071282	LMCD1	protein_coding	0.056616	0.069622	0.055892	0.102577	0.091298	0.070621
ENST00000157812	ENSG00000013275	PSMC4	protein_coding	18.3356	22.3265	15.3201	27.0722	18.4615	21.7441
ENST00000158009	ENSG00000073598	FNDC8	protein_coding	0.130207	0.310099	0	0	0.122667	0.122652
ENST00000158166	ENSG00000004660	CAMKK1	protein_coding	1.11902	1.24986	0.912176	0.829385	0.41937	0.142337
ENST00000158526	ENSG00000071859	FAM50A	protein_coding	1.6406	1.60064	1.05393	3.09531	1.43034	2.00767
ENST00000158762	ENSG00000072818	ACAP1	protein_coding	97.476	100.331	92.8789	147.811	87.4938	127.723
ENST00000158771	ENSG00000072849	DERL2	protein_coding	9.49656	7.67358	9.12049	5.86251	8.66585	6.57118
ENST00000159060	ENSG00000074771	NOX3	protein_coding	0	0	0	0	0	0
ENST00000159087	ENSG00000074855	ANO8	protein_coding	7.18712	5.47964	6.66735	10.0155	6.03954	7.74991
ENST00000159111	ENSG00000127663	KDM4B	protein_coding	4.97429	7.07837	8.51872	13.3638	5.84555	11.6725
ENST00000159647	ENSG00000073150	PANX2	protein_coding	0	0	0	0	0	0
ENST00000160262	ENSG00000076662	ICAM3	protein_coding	48.0622	37.5806	59.4951	50.8607	58.3218	13.0379
ENST00000160298	ENSG00000076826	CAMSAP3	protein_coding	0	0	0	0	0	0
ENST00000160373	ENSG00000077063	CTTNBP2	protein_coding	0	0	0	0	0.047521	0.023727
ENST00000160382	ENSG00000077080	ACTL6B	protein_coding	0	0	0	0.024596	0.017386	0
ENST00000160713	ENSG00000147724	FAM135B	protein_coding	0	0	0	0	0	0
ENST00000160740	ENSG00000079432	CIC	protein_coding	4.6441	4.52832	5.2323	10.1068	6.45645	6.79433
ENST00000160827	ENSG00000079616	KIF22	protein_coding	23.9777	23.9231	27.5839	30.557	27.3492	7.39024
ENST00000161006	ENSG00000005001	PRSS22	protein_coding	0.13492	0.127642	0	0.146106	0	0.024214
ENST00000161559	ENSG00000079385	CEACAM1	protein_coding	0.157585	0.503081	0.142724	0.0317	0.035857	0.140426
ENST00000161863	ENSG00000047188	YTHDC2	protein_coding	19.9083	18.7372	20.3588	11.548	17.9764	19.9236
ENST00000162044	ENSG00000064545	TMEM161A	protein_coding	5.40115	5.349	2.84712	7.64107	4.88183	5.04413
ENST00000162330	ENSG00000050820	BCAR1	protein_coding	0	0	0	0	0	0
ENST00000162391	ENSG00000065970	FOXJ2	protein_coding	7.61274	8.66764	10.3683	7.88278	7.28168	8.255
ENST00000162749	ENSG00000067182	TNFRSF1A	protein_coding	9.31786	10.848	8.06898	18.7676	7.40714	13.5702
ENST00000163416	ENSG00000066455	GOLGA5	protein_coding	4.17694	4.12903	3.88543	5.37493	4.72827	6.94176
ENST00000164024	ENSG00000008300	CELSR3	protein_coding	1.57465	1.52706	1.80412	1.02228	1.66937	1.9242
ENST00000164133	ENSG00000068971	PPP2R5B	protein_coding	3.89181	3.83588	3.39608	9.92269	4.37902	7.34088
ENST00000164139	ENSG00000068976	PYGM	protein_coding	2.63746	2.63264	2.52499	2.52807	1.9858	3.07693
ENST00000164227	ENSG00000069399	BCL3	protein_coding	9.89404	16.3292	22.6591	22.6636	11.4596	11.3398
ENST00000164247	ENSG00000069424	KCNAB2	protein_coding	0.155357	0.213792	0.369534	0.556818	0.400382	0.241454
ENST00000164305	ENSG00000069943	PIGB	protein_coding	7.70898	6.89632	8.52202	2.7397	7.84794	4.77573
ENST00000164640	ENSG00000067840	PDZD4	protein_coding	7.60015	0.086775	6.20807	2.16987	3.22529	2.9694
ENST00000165524	ENSG00000071677	PRLH	protein_coding	0	0	0	0	0	0
ENST00000165698	ENSG00000068615	REEP1	protein_coding	0.037914	0.064845	0.053286	0.014875	0.01726	0.014494
ENST00000166139	ENSG00000070404	FSTL3	protein_coding	0.323403	0.246251	0.254328	0.673922	0.46136	0.111212
ENST00000166244	ENSG00000070886	EPHA8	protein_coding	0	0.017017	0	0.011646	0	0.022543
ENST00000166345	ENSG00000071539	TRIP13	protein_coding	0.56531	0.510867	0.625253	0.554911	0.4363	0.626036
ENST00000166534	ENSG00000072682	P4HA2	protein_coding	0	0	0	0	0	0
ENST00000167106	ENSG00000071246	VASH1	protein_coding	2.32663	1.80014	2.62919	8.83413	2.19542	2.13714
ENST00000167462	ENSG00000073350	LLGL2	protein_coding	2.54915	1.81176	0.362632	1.30102	4.59338	0.472001
ENST00000167586	ENSG00000186847	KRT14	protein_coding	0	0	0	0	0	0
ENST00000167588	ENSG00000171431	KRT20	protein_coding	0	0	0	0	0	0
ENST00000168148	ENSG00000072080	SPP2	protein_coding	0	0	0	0	0	0
ENST00000168216	ENSG00000072506	HSD17B10	protein_coding	8.20166	12.3831	7.70864	21.5444	9.10078	15.4614
ENST00000168712	ENSG00000075388	FGF4	protein_coding	0	0	0	0	0	0
ENST00000168977	ENSG00000077009	NMRK2	protein_coding	0	0	0	0	0	0
ENST00000169293	ENSG00000127241	MASP1	protein_coding	0	0	0	0	0	0
ENST00000169298	ENSG00000073849	ST6GAL1	protein_coding	21.3817	5.02925	15.5184	47.9897	3.9142	2.7309
ENST00000169551	ENSG00000075336	TIMM21	protein_coding	0.975503	1.15454	0.664822	0.441259	1.55792	1.5499
ENST00000170150	ENSG00000078898	BPIFB2	protein_coding	0	0	0	0	0	0
ENST00000170168	ENSG00000079313	REXO1	protein_coding	20.6919	20.482	25.702	24.7857	23.7337	22.0226
ENST00000170447	ENSG00000075975	MKRN2	protein_coding	5.61975	11.9442	6.89204	10.1593	4.97667	6.74886
ENST00000170564	ENSG00000076650	GPATCH1	protein_coding	3.04318	2.83013	2.36734	3.08555	2.76118	4.81992
ENST00000170630	ENSG00000077238	IL4R	protein_coding	0.103052	0.781576	5.56911	0.102096	0.02373	0.208606
ENST00000171111	ENSG00000079999	KEAP1	protein_coding	2.16364	0.68553	0.018826	1.72069	1.89962	1.73003
ENST00000171757	ENSG00000078589	P2RY10	protein_coding	37.3307	32.886	33.5326	8.40305	22.4055	23.2867
ENST00000171887	ENSG00000079308	TNS1	protein_coding	0.003699	0	0	0	0	0
ENST00000172229	ENSG00000064300	NGFR	protein_coding	0.199714	0.073851	0.07254	0.404362	0.349457	0.179689
ENST00000172853	ENSG00000183091	NEB	protein_coding	0	0	0	0	0	0
ENST00000173229	ENSG00000065320	NTN1	protein_coding	0.262938	0.179405	0.175457	0.139388	0.254	0.131841
ENST00000173527	ENSG00000066583	ISOC1	protein_coding	3.75604	4.2668	3.37242	3.53379	3.4277	4.53002
ENST00000173898	ENSG00000067445	TRO	protein_coding	0.041958	0.077272	0.001411	0.06194	0.159723	0.225302
ENST00000174618	ENSG00000070444	MNT	protein_coding	15.9401	17.5801	19.0854	17.1013	16.6012	13.7076
ENST00000174653	ENSG00000070718	AP3M2	protein_coding	7.09949	7.42638	10.3062	7.42351	9.2824	6.60379
ENST00000175091	ENSG00000068697	LAPTM4A	protein_coding	18.9247	18.8219	16.6405	18.1352	21.8891	18.7502
ENST00000175238	ENSG00000069206	ADAM7	protein_coding	0	0	0	0	0	0
ENST00000175506	ENSG00000070669	ASNS	protein_coding	0.341588	1.50943	0.239646	2.09509	0.326806	2.86493
ENST00000175756	ENSG00000072135	PTPN18	protein_coding	8.91545	10.1595	4.08665	16.1629	7.64517	12.0717
ENST00000176183	ENSG00000069696	DRD4	protein_coding	1.91193	1.7251	3.23466	1.66857	1.76878	1.29622
ENST00000176195	ENSG00000070031	SCT	protein_coding	2.4905	2.06728	1.41892	4.6381	4.22447	3.543
ENST00000176643	ENSG00000072210	ALDH3A2	protein_coding	5.02448	2.54884	3.20519	0.428594	1.35425	1.42442
ENST00000176763	ENSG00000072786	STK10	protein_coding	53.3972	61.2065	58.8618	88.5946	60.9415	72.9709
ENST00000177648	ENSG00000073331	ALPK1	protein_coding	0	0	0	0.284524	0.363785	4.07177
ENST00000177694	ENSG00000073861	TBX21	protein_coding	14.8899	8.35046	9.48362	15.9799	17.4956	11.3091
ENST00000177742	ENSG00000074071	MRPS34	protein_coding	4.77261	3.94489	4.41938	1.86042	3.16313	3.2991
ENST00000178638	ENSG00000074410	CA12	protein_coding	0	0	0	0	0	0
ENST00000178640	ENSG00000137764	MAP2K5	protein_coding	7.9587	9.07658	10.7976	9.90975	8.53473	11.3196
ENST00000179259	ENSG00000078237	TIGAR	protein_coding	2.59617	1.79706	2.05582	1.0277	2.36446	3.13124
ENST00000180166	ENSG00000078579	FGF20	protein_coding	0.056599	0	0	0	0	0.033566
ENST00000180173	ENSG00000003987	MTMR7	protein_coding	0.190847	0.286693	0.088848	0.1248	0.058257	0.069293
ENST00000181383	ENSG00000080618	CPB2	protein_coding	0	0.098095	0	0	0	0
ENST00000181796	ENSG00000065809	FAM107B	protein_coding	0	0	0	0	0	0
ENST00000181839	ENSG00000065883	CDK13	protein_coding	4.51293	8.21499	5.02633	3.84413	4.41595	3.13997
ENST00000182290	ENSG00000064201	TSPAN32	protein_coding	0.603819	15.5952	3.53926	2.79826	6.66704	3.92868
ENST00000182377	ENSG00000064763	FAR2	protein_coding	0.089793	0.048289	0	0.131091	0.056214	0.08963
ENST00000182527	ENSG00000065308	TRAM2	protein_coding	5.1193	6.09288	5.82164	3.75208	11.1608	5.88616
ENST00000183605	ENSG00000066405	CLDN18	protein_coding	0	0	0	0	0	0
ENST00000184183	ENSG00000065371	ROPN1	protein_coding	0	0	0	0	0	0
ENST00000184266	ENSG00000065518	NDUFB4	protein_coding	4.31441	6.25071	9.91776	7.11139	5.91803	5.61602
ENST00000184956	ENSG00000068097	HEATR6	protein_coding	3.67065	3.436	5.13326	4.303	6.48333	4.69189
ENST00000185150	ENSG00000068912	ERLEC1	protein_coding	7.66715	8.02535	9.02915	3.94403	7.2469	6.95082
ENST00000185206	ENSG00000112782	CLIC5	protein_coding	0.075366	1.10194	0.505105	0.431652	0.383907	0.110906
ENST00000186436	ENSG00000075568	TMEM131	protein_coding	14.3827	15.5485	15.4972	14.2294	15.5016	17.5595
ENST00000187397	ENSG00000172995	ARPP21	protein_coding	0	0.059214	0	0	0.024938	0.047276
ENST00000187608	ENSG00000007129	CEACAM21	protein_coding	0.214947	0.979604	0.186339	0.87467	0.521927	0.891495
ENST00000187762	ENSG00000072954	TMEM38A	protein_coding	0.073482	0.157523	0.112988	0.376211	0.203396	0.180831
ENST00000187879	ENSG00000159885	ZNF222	protein_coding	1.29125	0.173414	0.205275	0.430618	0.442154	0.50538
ENST00000187910	ENSG00000170848	PSG6	protein_coding	0	0	0	0	0	0
ENST00000188312	ENSG00000075089	ACTR6	protein_coding	3.39781	4.24189	7.05276	2.10439	2.35623	2.65695
ENST00000188376	ENSG00000075415	SLC25A3	protein_coding	14.2852	9.71974	11.7689	9.02473	10.5924	6.47842
ENST00000188403	ENSG00000012504	NR1H4	protein_coding	0	0	0	0	0	0
ENST00000188790	ENSG00000078098	FAP	protein_coding	0	0	0	0	0	0
ENST00000189444	ENSG00000077150	NFKB2	protein_coding	9.16067	0	8.65508	25.511	0	12.3658
ENST00000189978	ENSG00000030304	MUSK	protein_coding	0	0	0	0	0	0
ENST00000190165	ENSG00000064218	DMRT3	protein_coding	0	0	0	0	0	0
ENST00000190611	ENSG00000079156	OSBPL6	protein_coding	0.057997	0.016002	0.018896	0.005476	0	0.031681
ENST00000190983	ENSG00000064205	WISP2	protein_coding	0	0	0	0	0	0
ENST00000191018	ENSG00000064601	CTSA	protein_coding	0	0.196127	0	0.207845	0	0
ENST00000191063	ENSG00000134461	ANKRD16	protein_coding	0	1.33377	0	0.016618	0.032425	0.843958
ENST00000192314	ENSG00000154252	GAL3ST2	protein_coding	0.996078	0.341984	0.319294	0.472582	1.49009	0.481615
ENST00000192788	ENSG00000065060	UHRF1BP1	protein_coding	4.43124	4.65923	4.65294	4.12008	4.02746	5.06767
ENST00000193322	ENSG00000081087	OSTM1	protein_coding	10.1772	9.78355	6.50343	11.4025	7.64194	11.863
ENST00000193391	ENSG00000081148	IMPG2	protein_coding	0.734551	0.622747	0.945047	0.364528	0.417985	0.538971
ENST00000193403	ENSG00000072110	ACTN1	protein_coding	18.0841	19.4304	28.3545	21.124	17.7362	27.1143
ENST00000194097	ENSG00000249437	NAIP	protein_coding	0	4.4852	2.87062	0	0	6.40074
ENST00000194118	ENSG00000081791	DELE1	protein_coding	0	1.63611	0	10.0893	2.64323	3.41672
ENST00000194130	ENSG00000081800	SLC13A1	protein_coding	0	0	0	0	0	0
ENST00000194152	ENSG00000081818	PCDHB4	protein_coding	0.063293	0.064874	0	0	0	0
ENST00000194155	ENSG00000112852	PCDHB2	protein_coding	0.219504	0.01529	0.313172	0	0.001614	0.021971
ENST00000194214	ENSG00000081870	HSPB11	protein_coding	2.80277	4.3106	2.45729	3.24929	2.58236	3.95716
ENST00000194530	ENSG00000082146	STRADB	protein_coding	2.12778	3.72262	1.5982	5.47098	3.23797	3.66513
ENST00000194900	ENSG00000082458	DLG3	protein_coding	0.063168	0.013231	0.036924	0	0	0.000247
ENST00000195173	ENSG00000082684	SEMA5B	protein_coding	0	0	0	0	0	0
ENST00000195649	ENSG00000065609	SNAP91	protein_coding	0	0	0	0	0	0
ENST00000196061	ENSG00000083444	PLOD1	protein_coding	1.87759	1.65283	0.799895	2.73162	2.41798	0.992062
ENST00000196169	ENSG00000083544	TDRD3	protein_coding	0.159731	0.478677	1.83228	0.286781	0.80255	1.23503
ENST00000196371	ENSG00000083720	OXCT1	protein_coding	12.0334	11.3728	9.80215	9.16356	10.3835	13.7562
ENST00000196482	ENSG00000083812	ZNF324	protein_coding	6.7689	6.24427	7.23514	6.03979	7.56712	6.22044
ENST00000196489	ENSG00000083817	ZNF416	protein_coding	2.22767	2.85686	2.47438	1.43246	2.0756	1.79616
ENST00000196551	ENSG00000083845	RPS5	protein_coding	317.297	300.947	179.306	253.671	162.825	187.51
ENST00000197268	ENSG00000084444	FAM234B	protein_coding	1.09924	1.18517	0.689769	1.40492	1.01577	1.58052
ENST00000198536	ENSG00000085514	PILRA	protein_coding	2.24283	2.36088	1.98738	7.95174	5.32423	4.19397
ENST00000198767	ENSG00000085721	RRN3	protein_coding	17.0014	14.6667	19.0534	10.6647	19.9799	13.1084
ENST00000198801	ENSG00000166391	MOGAT2	protein_coding	0	0	0	0	0	0
ENST00000198939	ENSG00000085872	CHERP	protein_coding	0.179752	5.19144	3.16222	2.95153	2.39957	4.65314
ENST00000199280	ENSG00000167580	AQP2	protein_coding	0	0	0	0	0	0
ENST00000199320	ENSG00000086189	DIMT1	protein_coding	4.46759	5.91298	5.03432	5.49657	4.95217	7.65029
ENST00000199389	ENSG00000086232	EIF2AK1	protein_coding	13.8273	16.7051	15.472	11.8894	12.7881	14.5619
ENST00000199447	ENSG00000086288	NME8	protein_coding	0.672866	0.409724	0.157857	0.171239	0.50594	0.255752
ENST00000199448	ENSG00000086289	EPDR1	protein_coding	0.07502	0.006206	0	0.066449	0.101264	0.098828
ENST00000199706	ENSG00000086504	MRPL28	protein_coding	9.14426	11.5046	8.18231	17.1021	10.5777	11.6844
ENST00000199708	ENSG00000086506	HBQ1	protein_coding	0	0	0	0.209404	0.057183	0.181568
ENST00000199764	ENSG00000086548	CEACAM6	protein_coding	0	0	0	0	0.024657	0
ENST00000199814	ENSG00000086589	RBM22	protein_coding	19.2307	18.8139	15.5095	16.4929	18.5171	20.0839
ENST00000199936	ENSG00000086696	HSD17B2	protein_coding	0	0	0	0	0	0
ENST00000199940	ENSG00000078018	MAP2	protein_coding	0	0	0	0	0	0
ENST00000200135	ENSG00000086827	ZW10	protein_coding	1.9903	2.93629	2.88093	3.08365	2.40403	4.48848
ENST00000200181	ENSG00000132470	ITGB4	protein_coding	0.030855	0	0.041946	0	0.066698	0.077991
ENST00000200453	ENSG00000087074	PPP1R15A	protein_coding	33.0323	28.578	13.6347	70.2278	50.8124	17.562
ENST00000200457	ENSG00000087077	TRIP6	protein_coding	1.75078	1.55181	3.79274	6.08896	3.8833	5.05139
ENST00000200557	ENSG00000073670	ADAM11	protein_coding	0.132339	0.117666	0.216966	0.144329	0.197931	0.218115
ENST00000200639	ENSG00000005893	LAMP2	protein_coding	1.16047	3.82738	2.12966	9.28021	4.43548	2.22809
ENST00000200652	ENSG00000197208	SLC22A4	protein_coding	0	0.017573	0.145674	0.596676	0.112616	0.286807
ENST00000200676	ENSG00000087237	CETP	protein_coding	0.037667	0	0	0.333062	0.089667	0.187519
ENST00000200691	ENSG00000087250	MT3	protein_coding	0	0	0	0	0.230611	0
ENST00000201015	ENSG00000087494	PTHLH	protein_coding	0	0	0	0	0	0
ENST00000201031	ENSG00000087510	TFAP2C	protein_coding	0	0	0.021373	0	0	0
ENST00000201586	ENSG00000088002	SULT2B1	protein_coding	0	0	0	0	0.043638	0
ENST00000201647	ENSG00000131037	EPS8L1	protein_coding	0.109512	0.273333	0.075439	0	0.350186	0.175549
ENST00000201943	ENSG00000182389	CACNB4	protein_coding	0	0	0	0	0	0
ENST00000201961	ENSG00000197183	NOL4L	protein_coding	0.553208	0.677066	0.332686	19.2511	0.613601	7.00628
ENST00000201963	ENSG00000088305	DNMT3B	protein_coding	0	0	0	0	0	0
ENST00000201979	ENSG00000088320	REM1	protein_coding	0	0	0	0	0	0
ENST00000202017	ENSG00000088356	PDRG1	protein_coding	4.86258	5.15685	4.14569	5.15593	4.29442	4.24268
ENST00000202028	ENSG00000088367	EPB41L1	protein_coding	0	0	0	0	0.02826	0
ENST00000202556	ENSG00000088808	PPP1R13B	protein_coding	3.25402	3.32086	3.86445	2.33307	1.82513	3.6407
ENST00000202625	ENSG00000166948	TGM6	protein_coding	0	0.025461	0	0	0	0
ENST00000202677	ENSG00000188559	RALGAPA2	protein_coding	8.38733	8.04459	8.55485	5.04084	7.63796	9.13838
ENST00000202773	ENSG00000089009	RPL6	protein_coding	34.4375	298.231	40.3094	126.164	8.88797	35.0905
ENST00000202816	ENSG00000089048	ESF1	protein_coding	2.33266	2.47614	2.90105	1.32823	2.80688	3.64433
ENST00000202831	ENSG00000089060	SLC8B1	protein_coding	0	4.40999	0.16684	0.156371	0.000988	0.023124
ENST00000202834	ENSG00000089063	TMEM230	protein_coding	3.97053	3.30197	3.71577	7.25948	2.54966	2.38299
ENST00000202917	ENSG00000089127	OAS1	protein_coding	1.59367	1.52982	0.685583	4.32362	2.73188	18.0023
ENST00000202967	ENSG00000089163	SIRT4	protein_coding	0.480102	0.108515	0.359007	0.189208	0.058679	0.32973
ENST00000203001	ENSG00000089195	TRMT6	protein_coding	3.00916	2.97125	2.11049	4.04401	3.16901	4.12026
ENST00000203166	ENSG00000249115	HAUS5	protein_coding	5.87613	7.31724	6.45104	8.64345	5.95221	7.93593
ENST00000203407	ENSG00000010256	UQCRC1	protein_coding	20.9417	21.6055	15.9309	35.5699	20.2914	25.0531
ENST00000203556	ENSG00000089639	GMIP	protein_coding	8.72915	9.36547	9.78677	20.7614	12.9134	11.1384
ENST00000203629	ENSG00000089692	LAG3	protein_coding	2.95625	2.29236	2.89895	10.0694	2.79801	6.75681
ENST00000203630	ENSG00000089693	MLF2	protein_coding	17.555	17.4698	15.0307	24.2782	2.81161	17.9598
ENST00000203664	ENSG00000089723	OTUB2	protein_coding	0.920415	0.599912	0.643464	0.190331	0.522463	0.472953
ENST00000204005	ENSG00000090006	LTBP4	protein_coding	0	0.184757	0.124794	0.079692	0	0.173955
ENST00000204517	ENSG00000090447	TFAP4	protein_coding	3.88636	4.99266	6.36088	4.57579	4.40809	6.03724
ENST00000204549	ENSG00000090470	PDCD7	protein_coding	11.9032	11.395	12.5014	14.9213	9.82556	14.1115
ENST00000204566	ENSG00000090487	SPG21	protein_coding	5.12986	4.8938	7.41927	9.30606	1.79422	2.17348
ENST00000204604	ENSG00000090539	CHRD	protein_coding	0	0.011543	0	0	0	0.007003
ENST00000204615	ENSG00000090534	THPO	protein_coding	0	0	0	0	0	0
ENST00000204637	ENSG00000090554	FLT3LG	protein_coding	2.27944	3.64433	3.9063	8.36762	4.31298	5.48841
ENST00000204679	ENSG00000090581	GNPTG	protein_coding	8.67296	8.92911	9.40151	12.9551	8.02072	10.1985
ENST00000204726	ENSG00000090615	GOLGA3	protein_coding	0.81955	4.55105	2.0389	2.94788	0.656045	2.61968
ENST00000204801	ENSG00000090659	CD209	protein_coding	0	0	0	0	0	0
ENST00000204961	ENSG00000090776	EFNB1	protein_coding	0.802015	1.28594	0.75048	3.59534	0.796974	1.42536
ENST00000205061	ENSG00000090863	GLG1	protein_coding	24.4011	29.8084	22.1417	26.4707	20.8649	32.4691
ENST00000205135	ENSG00000090924	PLEKHG2	protein_coding	0	0	0	0	0	0
ENST00000205143	ENSG00000090932	DLL3	protein_coding	0	0	0	0	0	0
ENST00000205194	ENSG00000090971	NAT14	protein_coding	1.45145	0.322037	1.77355	1.36199	0.821039	0.788933
ENST00000205214	ENSG00000157426	AASDH	protein_coding	0	0.962681	0	0.661425	0	1.10731
ENST00000205386	ENSG00000091128	LAMB4	protein_coding	0	0	0	0	0	0
ENST00000205402	ENSG00000091140	DLD	protein_coding	19.4387	16.6356	19.7212	9.45482	19.4363	13.823
ENST00000205557	ENSG00000091262	ABCC6	protein_coding	0.041565	0.024046	0.047359	0.049765	0.123357	0.079189
ENST00000205636	ENSG00000091317	CMTM6	protein_coding	27.8891	26.5266	23.0296	34.1304	27.5833	26.0058
ENST00000205890	ENSG00000091536	MYO15A	protein_coding	0.252792	0.216227	0.256612	0.129139	0.159616	0.125062
ENST00000205948	ENSG00000091583	APOH	protein_coding	0	0	0	0	0	0
ENST00000206020	ENSG00000091640	SPAG7	protein_coding	1.23807	5.56255	5.47162	7.64318	6.51181	5.46225
ENST00000206249	ENSG00000091831	ESR1	protein_coding	0	0	0	0.326939	0	0.547956
ENST00000206262	ENSG00000091844	RGS17	protein_coding	0	0	0	0	0	0
ENST00000206380	ENSG00000091947	TMEM101	protein_coding	6.98737	5.72265	3.13085	8.25133	5.36868	5.31276
ENST00000206423	ENSG00000091986	CCDC80	protein_coding	0	0.020301	0.013737	0.004631	0	0.015954
ENST00000206446	ENSG00000092009	CMA1	protein_coding	0	0	0	0	0	0
ENST00000206451	ENSG00000092010	PSME1	protein_coding	28.5468	39.7523	23.3209	60.5736	36.6414	25.8138
ENST00000206474	ENSG00000092036	HAUS4	protein_coding	1.00114	0.532146	0.025491	0.167333	0.147628	2.86038
ENST00000206513	ENSG00000092067	CEBPE	protein_coding	0	0.139792	0.027515	0.183245	0.160763	0.139764
ENST00000206542	ENSG00000092094	OSGEP	protein_coding	7.03087	8.34908	6.88697	9.21784	7.82388	9.09288
ENST00000206595	ENSG00000092140	G2E3	protein_coding	3.83637	8.63955	3.72456	0.218667	1.85994	3.65396
ENST00000206765	ENSG00000092295	TGM1	protein_coding	0.576582	0.31113	0.594004	0.469055	0.406299	0.701785
ENST00000207157	ENSG00000092607	TBX15	protein_coding	0.035335	0.042662	0.056991	0	0.01455	0
ENST00000207457	ENSG00000092850	TEKT2	protein_coding	0	0.185022	0	0.087747	0.155165	0
ENST00000207549	ENSG00000092929	UNC13D	protein_coding	25.6222	29.8511	24.6863	49.5991	27.543	37.6422
ENST00000207870	ENSG00000093217	XYLB	protein_coding	0.3389	0.795357	0.589919	2.21277	1.15564	1.8499
ENST00000209540	ENSG00000094661	OR1I1	protein_coding	0	0	0	0	0	0
ENST00000209665	ENSG00000196344	ADH7	protein_coding	0	0	0	0	0	0
ENST00000209668	ENSG00000187758	ADH1A	protein_coding	0	0	0	0	0	0
ENST00000209718	ENSG00000108244	KRT23	protein_coding	0	0.042333	0	0.123322	0	0.02823
ENST00000209728	ENSG00000094804	CDC6	protein_coding	0.072249	0.141808	0.193257	0.527185	0.317121	0.520706
ENST00000209873	ENSG00000094914	AAAS	protein_coding	4.44458	7.90951	6.20545	11.5049	9.07918	8.81752
ENST00000209875	ENSG00000094916	CBX5	protein_coding	16.1488	18.1297	19.7331	15.5477	15.4754	17.6885
ENST00000209884	ENSG00000076321	KLHL20	protein_coding	9.77465	9.24056	9.74431	5.7061	8.51929	9.51454
ENST00000209929	ENSG00000094963	FMO2	protein_coding	0	0	0	0	0	0
ENST00000210060	ENSG00000095059	DHPS	protein_coding	18.7648	14.3769	19.9942	17.5737	20.1153	26.0142
ENST00000210187	ENSG00000167964	RAB26	protein_coding	0	0.04754	0.318122	0.266983	0.214733	0
ENST00000210227	ENSG00000119314	PTBP3	protein_coding	2.97653	2.87307	4.01845	4.03992	2.35308	3.34596
ENST00000210313	ENSG00000095261	PSMD5	protein_coding	9.28574	11.5753	14.4861	6.34771	10.7231	10.8438
ENST00000210444	ENSG00000095380	NANS	protein_coding	5.45326	4.92076	3.36755	7.64104	5.51334	7.49054
ENST00000210633	ENSG00000095539	SEMA4G	protein_coding	0.378585	0.090677	0.202532	0.133488	0.207188	0.357695
ENST00000211076	ENSG00000095917	TPSD1	protein_coding	0	0	0	0	0	0
ENST00000211122	ENSG00000174156	GSTA3	protein_coding	0	0	0	0	0	0
ENST00000211287	ENSG00000156711	MAPK13	protein_coding	4.37912	3.52589	4.14202	5.92501	4.34624	6.77647
ENST00000211314	ENSG00000096092	TMEM14A	protein_coding	3.43374	3.14164	1.93015	3.50216	3.58679	5.3453
ENST00000211379	ENSG00000204463	BAG6	protein_coding	5.2855	0.396243	3.64811	2.14123	6.96735	5.50129
ENST00000211413	ENSG00000204314	PRRT1	protein_coding	0.716486	0.618497	0.983576	0.493419	0.294678	0.48972
ENST00000211921	ENSG00000204482	LST1	protein_coding	0	0.073861	0.104852	0.124239	0	0
ENST00000211936	ENSG00000096654	ZNF184	protein_coding	4.43058	3.9187	4.18964	2.66266	1.17862	4.17864
ENST00000211998	ENSG00000035403	VCL	protein_coding	7.26184	12.2606	0.133723	0.239866	0.281746	0.670288
ENST00000212015	ENSG00000096717	SIRT1	protein_coding	8.87798	8.3756	8.70729	4.9052	11.469	7.73898
ENST00000212355	ENSG00000069702	TGFBR3	protein_coding	9.81266	4.27346	10.2178	4.13038	14.0584	5.08664
ENST00000214869	ENSG00000099203	TMED1	protein_coding	2.69607	3.00979	3.18629	7.21877	2.617	4.28935
ENST00000215057	ENSG00000099326	MZF1	protein_coding	6.87711	3.50556	3.73838	11.2276	2.10642	5.10102
ENST00000215061	ENSG00000099330	OCEL1	protein_coding	0.469406	0.541259	0.194148	0.396415	1.11666	0.10669
ENST00000215071	ENSG00000099341	PSMD8	protein_coding	11.3951	10.2758	2.04139	9.80012	7.55861	0.828751
ENST00000215095	ENSG00000099365	STX1B	protein_coding	0.368298	0.483291	0.486335	0.423648	0.448813	0.594493
ENST00000215115	ENSG00000099385	BCL7C	protein_coding	5.00014	4.88514	5.79605	9.29045	3.73465	4.70216
ENST00000215368	ENSG00000099617	EFNA2	protein_coding	0	0	0	0	0	0
ENST00000215375	ENSG00000099624	ATP5F1D	protein_coding	4.62968	13.0879	9.00449	19.0478	9.20456	15.6296
ENST00000215473	ENSG00000099715	PCDH11Y	protein_coding	0	0	0	0	0	0
ENST00000215479	ENSG00000099721	AMELY	protein_coding	0	0	0	0	0	0
ENST00000215530	ENSG00000070388	FGF22	protein_coding	0	0.064162	0	0.065461	0.050442	0.253504
ENST00000215531	ENSG00000095932	SMIM24	protein_coding	0	0	0	0	0.100185	0
ENST00000215539	ENSG00000099769	IGFALS	protein_coding	0	0	0	0	0	0
ENST00000215555	ENSG00000099785	2019-03-02	protein_coding	4.6276	6.44867	3.65205	4.03457	11.3275	2.35947
ENST00000215565	ENSG00000099795	NDUFB7	protein_coding	23.8349	17.4051	17.027	41.4881	19.8691	24.4225
ENST00000215567	ENSG00000099797	TECR	protein_coding	16.1335	17.127	21.6911	23.1294	18.0895	24.3661
ENST00000215570	ENSG00000099800	TIMM13	protein_coding	4.84061	7.13147	4.05013	13.001	5.42559	8.81897
ENST00000215574	ENSG00000099804	CDC34	protein_coding	9.02774	7.15558	9.43644	23.1454	6.74491	11.7872
ENST00000215582	ENSG00000099812	MISP	protein_coding	0.067198	0.087798	0.029786	0	0	0.019735
ENST00000215631	ENSG00000099860	GADD45B	protein_coding	14.6978	14.796	11.9851	11.0141	12.3753	11.8855
ENST00000215637	ENSG00000099866	MADCAM1	protein_coding	0	0.105611	0	0.089679	0.05259	0
ENST00000215659	ENSG00000188130	MAPK12	protein_coding	0.024433	0.206216	0.158631	0.107519	0.099889	0.057785
ENST00000215727	ENSG00000099937	SERPIND1	protein_coding	0.387071	0.228657	0.198378	0.405696	0.252213	0.16048
ENST00000215730	ENSG00000099940	SNAP29	protein_coding	6.3112	6.41794	4.02099	9.10565	6.93143	7.74335
ENST00000215739	ENSG00000099949	LZTR1	protein_coding	1.38056	0.048418	0.483375	0.288485	0.149062	0.07836
ENST00000215742	ENSG00000184436	THAP7	protein_coding	11.0521	4.41559	10.3631	6.79623	10.3157	9.57835
ENST00000215743	ENSG00000099953	MMP11	protein_coding	0.400992	0.334672	0.45267	0.461169	0.815609	0.929559
ENST00000215754	ENSG00000240972	MIF	protein_coding	39.9383	45.7097	39.7867	69.7647	34.6411	46.9189
ENST00000215770	ENSG00000099974	DDTL	protein_coding	3.16446	2.60683	2.205	6.05089	2.17571	2.78336
ENST00000215781	ENSG00000099985	OSM	protein_coding	3.70255	3.65695	2.74352	4.59517	2.28122	4.53008
ENST00000215790	ENSG00000099992	TBC1D10A	protein_coding	17.0842	22.0017	21.5563	27.2313	19.7207	22.5099
ENST00000215793	ENSG00000099995	SF3A1	protein_coding	30.3106	38.7604	38.3418	34.5256	37.9146	37.677
ENST00000215794	ENSG00000184979	USP18	protein_coding	2.12615	1.83546	1.46987	2.52185	3.303	9.05659
ENST00000215798	ENSG00000099999	RNF215	protein_coding	1.43251	0.987195	1.07781	1.26623	0.979767	1.16872
ENST00000215812	ENSG00000100012	SEC14L3	protein_coding	0	0	0	0	0	0
ENST00000215829	ENSG00000100028	SNRPD3	protein_coding	15.7472	16.5369	16.4828	13.2016	14.846	14.8674
ENST00000215832	ENSG00000100030	MAPK1	protein_coding	14.9617	15.0098	13.7793	14.2863	15.1398	14.7598
ENST00000215838	ENSG00000185339	TCN2	protein_coding	0.303812	0.033182	0.066794	0.312472	0.262965	0.144287
ENST00000215855	ENSG00000100053	CRYBB3	protein_coding	0	0	0	0.126536	0	0
ENST00000215862	ENSG00000133422	MORC2	protein_coding	1.76877	2.42728	3.75953	1.1662	2.15641	1.74921
ENST00000215882	ENSG00000100075	SLC25A1	protein_coding	9.38026	6.65359	8.14418	12.1134	9.78923	8.37781
ENST00000215885	ENSG00000100078	PLA2G3	protein_coding	0	0	0	0	0	0
ENST00000215886	ENSG00000100079	LGALS2	protein_coding	1.05077	1.84932	0.208071	1.6442	3.26406	2.33923
ENST00000215904	ENSG00000241360	PDXP	protein_coding	1.77755	3.01019	1.80041	6.29087	2.48572	4.08106
ENST00000215906	ENSG00000128203	ASPHD2	protein_coding	1.00141	1.3408	1.09878	3.93352	1.75161	2.53709
ENST00000215909	ENSG00000100097	LGALS1	protein_coding	63.6325	42.1667	19.2335	91.1728	50.6683	55.8298
ENST00000215912	ENSG00000100100	PIK3IP1	protein_coding	216.675	229.707	264.639	116.003	209.873	133.98
ENST00000215917	ENSG00000100104	SRRD	protein_coding	10.8278	10.3821	10.3269	6.56388	10.8258	7.5546
ENST00000215919	ENSG00000100105	PATZ1	protein_coding	11.5037	10.7318	14.2447	11.6011	11.6336	11.0708
ENST00000215939	ENSG00000100122	CRYBB1	protein_coding	0.051156	0	0	0.104477	0	0
ENST00000215941	ENSG00000100124	ANKRD54	protein_coding	3.46848	2.77518	3.53263	6.56589	3.93319	6.24356
ENST00000215956	ENSG00000100138	SNU13	protein_coding	10.2792	14.7086	12.606	17.0125	9.52856	13.8261
ENST00000215957	ENSG00000100139	MICALL1	protein_coding	7.08764	9.03833	8.0724	8.90013	7.23309	8.83996
ENST00000215980	ENSG00000100162	CENPM	protein_coding	5.15193	0.188466	2.1331	1.6189	0.927847	0.359787
ENST00000216014	ENSG00000100196	KDELR3	protein_coding	0.560295	0.807937	0.678843	0.044389	0.265195	0.099115
ENST00000216024	ENSG00000100206	DMC1	protein_coding	0.082235	0.050141	0.040123	0.178916	0.082456	0.1219
ENST00000216027	ENSG00000100209	HSCB	protein_coding	2.76993	2.31413	2.49375	5.22086	3.11102	3.68539
ENST00000216029	ENSG00000100211	CBY1	protein_coding	0	0	0	2.26473	0	1.98592
ENST00000216034	ENSG00000100216	TOMM22	protein_coding	11.1249	13.467	10.2122	19.1665	11.7643	12.8637
ENST00000216036	ENSG00000100218	RSPH14	protein_coding	0.059915	0	0	0.125367	0	0.169114
ENST00000216037	ENSG00000100219	XBP1	protein_coding	15.854	1.24229	4.5445	2.90502	2.90879	8.98382
ENST00000216038	ENSG00000100220	RTCB	protein_coding	15.4284	14.2138	13.4204	15.3812	13.0225	16.4522
ENST00000216039	ENSG00000100221	JOSD1	protein_coding	32.9256	36.3588	37.846	22.4776	31.8397	21.4571
ENST00000216044	ENSG00000100226	GTPBP1	protein_coding	21.1265	23.8833	24.3217	25.2585	23.0499	24.1076
ENST00000216061	ENSG00000100239	PPP6R2	protein_coding	5.2222	7.02536	8.92941	7.05011	6.61174	10.2073
ENST00000216068	ENSG00000100246	DNAL4	protein_coding	2.33863	1.78209	1.2758	4.55271	2.12191	1.81441
ENST00000216071	ENSG00000100249	C22orf31	protein_coding	0	0	0	0	0	0
ENST00000216075	ENSG00000100253	MIOX	protein_coding	0	0	0	0	0	0.100078
ENST00000216080	ENSG00000100258	LMF2	protein_coding	2.81317	2.55887	2.81734	8.38112	2.60465	3.90292
ENST00000216083	ENSG00000183741	CBX6	protein_coding	0.818873	1.42165	0	1.83907	1.03385	0.765365
ENST00000216085	ENSG00000100263	RHBDD3	protein_coding	2.81159	3.34847	3.42636	5.25305	2.8729	2.94111
ENST00000216099	ENSG00000243811	APOBEC3D	protein_coding	3.84308	7.64774	3.64948	9.18763	3.04081	12.169
ENST00000216101	ENSG00000100276	RASL10A	protein_coding	0	0	0	0.093475	0	0
ENST00000216106	ENSG00000100281	HMGXB4	protein_coding	8.11147	5.97522	8.54197	4.955	8.41983	4.9377
ENST00000216115	ENSG00000100290	BIK	protein_coding	0.498183	0.645619	0.669412	1.69035	0.925736	1.05074
ENST00000216117	ENSG00000100292	HMOX1	protein_coding	2.68746	1.68495	0.548271	26.5938	6.89357	5.04936
ENST00000216121	ENSG00000184117	NIPSNAP1	protein_coding	3.61093	4.26657	3.89606	5.33371	3.39701	4.499
ENST00000216122	ENSG00000100297	MCM5	protein_coding	9.15057	9.16471	8.69127	14.146	10.0857	13.7331
ENST00000216124	ENSG00000100299	ARSA	protein_coding	7.55105	12.6071	12.3685	27.2178	8.37385	17.0019
ENST00000216127	ENSG00000100302	RASD2	protein_coding	0	0	0.17536	0	0	0
ENST00000216129	ENSG00000100304	TTLL12	protein_coding	4.89523	7.32684	2.88078	11.8348	6.17371	10.6039
ENST00000216133	ENSG00000100307	CBX7	protein_coding	26.7095	32.2847	32.1201	30.5876	26.6271	29.0658
ENST00000216139	ENSG00000100312	ACR	protein_coding	0	0	0	0	0	0
ENST00000216144	ENSG00000100314	CABP7	protein_coding	0.378922	0.170339	0.411268	0.282615	0.170537	0.236048
ENST00000216146	ENSG00000100316	RPL3	protein_coding	1232.75	1205.22	1141.79	1204.3	951.86	851.105
ENST00000216155	ENSG00000100321	SYNGR1	protein_coding	0.088408	0	0	0.006479	0.043757	0.045534
ENST00000216160	ENSG00000100324	TAB1	protein_coding	9.0135	10.2453	9.36172	15.1501	10.0837	15.641
ENST00000216177	ENSG00000100341	PNPLA5	protein_coding	0	0	0	0	0	0
ENST00000216180	ENSG00000100344	PNPLA3	protein_coding	0	0	0.037922	0.030981	0	0
ENST00000216181	ENSG00000100345	MYH9	protein_coding	192.574	216.388	219.322	238.912	226.187	235.757
ENST00000216185	ENSG00000100348	TXN2	protein_coding	8.62543	8.12682	7.53651	0.924705	7.90668	6.15227
ENST00000216187	ENSG00000100350	FOXRED2	protein_coding	0	0	0	0	0	0
ENST00000216190	ENSG00000100353	EIF3D	protein_coding	28.8986	17.2741	24.9553	30.5089	21.2051	20.5796
ENST00000216194	ENSG00000239900	ADSL	protein_coding	0.338418	0.167908	0.345986	1.25577	1.08435	0.177124
ENST00000216200	ENSG00000100362	PVALB	protein_coding	0.327694	0.140545	0	0	0	0
ENST00000216211	ENSG00000100373	UPK3A	protein_coding	0	0	0	0.300923	0.401062	0.149691
ENST00000216214	ENSG00000100376	FAM118A	protein_coding	9.97516	22.5572	10.543	23.4729	17.9024	25.8359
ENST00000216218	ENSG00000100380	ST13	protein_coding	24.2296	23.7405	22.1928	20.4466	20.0058	20.8329
ENST00000216223	ENSG00000100385	IL2RB	protein_coding	13.4872	15.989	19.5896	32.0006	11.6897	19.8824
ENST00000216225	ENSG00000100387	RBX1	protein_coding	11.3514	11.2318	10.8557	17.537	11.1716	13.5195
ENST00000216237	ENSG00000100395	L3MBTL2	protein_coding	7.68143	9.17741	7.53984	16.0964	8.52569	12.8472
ENST00000216241	ENSG00000100399	CHADL	protein_coding	1.22172	0.796597	0	0	0	0.093385
ENST00000216252	ENSG00000100410	PHF5A	protein_coding	13.5704	12.5089	11.3386	7.71663	10.7079	11.9835
ENST00000216254	ENSG00000100412	ACO2	protein_coding	17.7499	20.4869	22.1963	22.6457	22.7365	22.88
ENST00000216259	ENSG00000100417	PMM1	protein_coding	9.31354	11.5755	9.61287	15.7334	7.84052	9.42915
ENST00000216264	ENSG00000100422	CERK	protein_coding	40.6066	42.3925	44.8989	51.1465	35.9602	42.3873
ENST00000216267	ENSG00000100425	BRD1	protein_coding	3.35482	1.49012	1.64865	1.49807	1.78101	1.2601
ENST00000216268	ENSG00000100426	ZBED4	protein_coding	16.3353	13.7272	17.8922	12.8579	23.166	13.0768
ENST00000216271	ENSG00000100429	HDAC10	protein_coding	1.43334	3.02161	0.335108	5.14555	3.09216	0.372928
ENST00000216274	ENSG00000129465	RIPK3	protein_coding	4.86351	5.27795	3.95597	8.2788	4.44435	10.4695
ENST00000216277	ENSG00000090060	PAPOLA	protein_coding	32.0217	3.43016	3.44153	25.9258	0.977686	31.1667
ENST00000216281	ENSG00000080824	HSP90AA1	protein_coding	75.5287	75.4823	60.2103	37.0274	73.3331	84.0414
ENST00000216286	ENSG00000087303	NID2	protein_coding	0.304085	0.161305	0.17682	0.064445	0.345013	0.043622
ENST00000216288	ENSG00000075413	MARK3	protein_coding	7.91403	9.34897	9.80331	5.80218	11.7428	12.2759
ENST00000216294	ENSG00000023608	SNAPC1	protein_coding	1.33149	1.9658	1.3391	1.2996	2.29097	1.5888
ENST00000216297	ENSG00000092201	SUPT16H	protein_coding	18.2892	17.4384	20.1356	13.3359	16.5935	18.6319
ENST00000216327	ENSG00000100439	ABHD4	protein_coding	0.636013	0.571115	0.26518	0.116907	0.327958	0.361181
ENST00000216330	ENSG00000100442	FKBP3	protein_coding	0	0	0	0	0	0
ENST00000216336	ENSG00000100448	CTSG	protein_coding	0	0	0	0	0	0.157529
ENST00000216338	ENSG00000100450	GZMH	protein_coding	39.7746	21.3694	15.4842	18.9657	42.7774	24.7128
ENST00000216341	ENSG00000100453	GZMB	protein_coding	7.86916	6.80418	2.45444	1.87885	11.2112	8.91658
ENST00000216350	ENSG00000100462	PRMT5	protein_coding	0	0	0	0	0	0
ENST00000216361	ENSG00000100473	COCH	protein_coding	0	0	0	0.097336	0	0
ENST00000216366	ENSG00000100478	AP4S1	protein_coding	3.57419	4.74892	3.32153	1.71019	2.40904	2.57911
ENST00000216367	ENSG00000100479	POLE2	protein_coding	0	0.510259	0	0.073809	0	0
ENST00000216373	ENSG00000100485	SOS2	protein_coding	17.0936	15.4058	17.2225	11.3297	14.3441	13.1782
ENST00000216378	ENSG00000100490	CDKL1	protein_coding	0.002601	0.19037	0.517842	0.437083	0.134756	0.146595
ENST00000216392	ENSG00000100504	PYGL	protein_coding	0.931773	0.927541	0.407569	2.58197	0.743877	0.459055
ENST00000216410	ENSG00000100522	GNPNAT1	protein_coding	3.69482	3.50563	2.30184	4.023	2.45221	4.42035
ENST00000216416	ENSG00000100528	CNIH1	protein_coding	9.81376	10.0833	8.1047	7.44968	7.83738	5.3989
ENST00000216420	ENSG00000100532	CGRRF1	protein_coding	9.43848	8.80809	7.67152	4.34295	6.94583	6.22235
ENST00000216442	ENSG00000100554	ATP6V1D	protein_coding	6.15792	3.40233	3.27966	5.99648	7.98549	8.9535
ENST00000216445	ENSG00000100557	CCDC198	protein_coding	0	0	0	0	0	0.01496
ENST00000216446	ENSG00000100558	PLEK2	protein_coding	0.216293	0.2547	0.084584	0	0.117159	0.236597
ENST00000216452	ENSG00000100564	PIGH	protein_coding	9.16622	8.81041	7.73132	9.49981	9.60601	10.388
ENST00000216455	ENSG00000100567	PSMA3	protein_coding	26.5025	23.2235	21.9256	19.7875	15.277	19.8571
ENST00000216465	ENSG00000100577	GSTZ1	protein_coding	1.36297	0.686064	0.792095	1.57584	0.666607	1.3538
ENST00000216468	ENSG00000100580	TMED8	protein_coding	4.84126	4.91162	4.31145	4.72262	4.72584	4.89781
ENST00000216471	ENSG00000100583	SAMD15	protein_coding	0.065808	0.031087	0	0	0.079458	0.017826
ENST00000216479	ENSG00000100591	AHSA1	protein_coding	2.91882	3.36554	2.14518	1.78908	2.7745	5.57027
ENST00000216484	ENSG00000100596	SPTLC2	protein_coding	3.43367	4.49748	3.13526	6.83885	4.21997	6.70346
ENST00000216487	ENSG00000100599	RIN3	protein_coding	12.1741	11.4182	12.9905	15.4492	17.0543	16.0013
ENST00000216489	ENSG00000100601	ALKBH1	protein_coding	1.89585	1.95537	2.54614	2.33891	1.86672	2.93365
ENST00000216492	ENSG00000100604	CHGA	protein_coding	0.100014	0.040142	0.116747	0.168226	0	0
ENST00000216500	ENSG00000100612	DHRS7	protein_coding	1.93379	0.925069	0.916232	0.424709	3.21887	1.16232
ENST00000216513	ENSG00000100625	SIX4	protein_coding	0	0	0	0	0	0
ENST00000216517	ENSG00000100629	CEP128	protein_coding	3.50452	3.51637	3.14968	0	0.442559	0
ENST00000216540	ENSG00000100652	SLC10A1	protein_coding	0.264877	0.233776	0.075953	0.059195	0.215165	0.02756
ENST00000216554	ENSG00000100664	EIF5	protein_coding	20.3692	17.5806	17.7787	11.5729	12.4427	13.0236
ENST00000216568	ENSG00000100678	SLC8A3	protein_coding	0	0	0	0	0	0
ENST00000216602	ENSG00000100711	ZFYVE21	protein_coding	0	0.198103	0.069823	0.84204	0.100863	0.547443
ENST00000216605	ENSG00000100714	MTHFD1	protein_coding	5.41418	6.2846	4.00972	9.73709	6.66215	8.70012
ENST00000216629	ENSG00000100739	BDKRB1	protein_coding	0	0	0	0	0	0
ENST00000216639	ENSG00000100749	VRK1	protein_coding	14.576	13.8075	14.9293	8.46234	13.2195	10.8228
ENST00000216714	ENSG00000100823	APEX1	protein_coding	3.18857	14.6176	22.4701	6.15726	6.17765	29.5394
ENST00000216727	ENSG00000100836	PABPN1	protein_coding	1.32377	1.33925	0.865991	0.721395	1.65037	1.84569
ENST00000216733	ENSG00000100842	EFS	protein_coding	0	0	0	0	0	0
ENST00000216756	ENSG00000100865	CINP	protein_coding	3.97649	4.33617	3.92419	3.77307	4.26146	6.12057
ENST00000216774	ENSG00000100883	SRP54	protein_coding	11.4531	12.4116	12.0492	8.82457	6.01489	4.5228
ENST00000216780	ENSG00000100889	PCK2	protein_coding	3.52593	0.895415	0	0.728054	0.867772	0.217556
ENST00000216797	ENSG00000100906	NFKBIA	protein_coding	13.1544	21.8268	19.6261	27.3459	21.9231	16.0149
ENST00000216799	ENSG00000100908	EMC9	protein_coding	0.004845	0.245465	0	1.5892	0	0.480979
ENST00000216802	ENSG00000100911	PSME2	protein_coding	15.0058	17.9304	17.423	58.5932	15.8106	31.0478
ENST00000216807	ENSG00000100916	BRMS1L	protein_coding	1.23268	1.73559	1.3214	1.16358	1.44692	1.90001
ENST00000216832	ENSG00000100941	PNN	protein_coding	22.633	24.2029	29.7626	17.4205	29.0969	27.7471
ENST00000216840	ENSG00000100949	RABGGTA	protein_coding	1.83651	3.28878	2.38033	3.73536	3.32173	1.3696
ENST00000216862	ENSG00000019186	CYP24A1	protein_coding	0	0.048479	0	0	0.061226	0
ENST00000216877	ENSG00000132670	PTPRA	protein_coding	17.4471	9.69566	15.7894	0.599845	2.1394	7.41564
ENST00000216879	ENSG00000088833	NSFL1C	protein_coding	7.25603	6.88652	7.51679	4.01552	7.51108	8.00377
ENST00000216923	ENSG00000020256	ZFP64	protein_coding	1.00193	0	0.707219	1.52277	1.22293	1.38126
ENST00000216927	ENSG00000089012	SIRPG	protein_coding	0	0	0	0	0	0
ENST00000216951	ENSG00000100983	GSS	protein_coding	7.7999	8.37131	5.82495	7.83217	6.589	10.5756
ENST00000216962	ENSG00000100994	PYGB	protein_coding	15.4971	17.8158	15.2367	28.7843	16.1132	20.5147
ENST00000216968	ENSG00000101000	PROCR	protein_coding	0.211419	0.21611	0.344824	0.270079	0.518017	0.460817
ENST00000217026	ENSG00000101057	MYBL2	protein_coding	0.31789	0.755523	0.589271	2.40069	2.40926	1.75577
ENST00000217043	ENSG00000101074	R3HDML	protein_coding	0	0	0	0	0	0
ENST00000217073	ENSG00000101104	PABPC1L	protein_coding	0	0	0	0	0	0
ENST00000217074	ENSG00000101104	PABPC1L	protein_coding	8.31268	7.42214	8.24706	1.14859	8.53311	11.5711
ENST00000217075	ENSG00000101104	PABPC1L	protein_coding	0	0	0	0.061009	0	0
ENST00000217086	ENSG00000101115	SALL4	protein_coding	0.084111	0.045741	0.04926	0.076785	0.025566	0.086925
ENST00000217109	ENSG00000101138	CSTF1	protein_coding	7.58994	6.18834	6.18278	3.88975	5.85183	5.33376
ENST00000217121	ENSG00000101150	TPD52L2	protein_coding	0.036412	0.046332	0.067325	0.135714	0.082347	0.093985
ENST00000217131	ENSG00000101160	CTSZ	protein_coding	10.8707	10.6444	7.28974	36.3226	15.2108	16.7647
ENST00000217133	ENSG00000101162	TUBB1	protein_coding	11.9058	16.9067	2.57331	0.915533	3.98841	0.84612
ENST00000217159	ENSG00000101187	SLCO4A1	protein_coding	0.035118	0.49392	0.273708	0.574856	0.40328	0.607494
ENST00000217162	ENSG00000101190	TCFL5	protein_coding	1.48757	0.434159	2.21015	1.76607	1.93709	1.59125
ENST00000217169	ENSG00000101197	BIRC7	protein_coding	0.070314	0.200154	0.037261	0.048844	0	0.037414
ENST00000217173	ENSG00000185019	UBOX5	protein_coding	4.39151	2.40529	5.418	4.77545	4.51429	3.65281
ENST00000217182	ENSG00000101210	EEF1A2	protein_coding	0.096489	0.233749	0.062842	0.114333	0.166181	0.247338
ENST00000217185	ENSG00000101213	PTK6	protein_coding	0	0	0	0	0	0
ENST00000217188	ENSG00000125508	SRMS	protein_coding	0.031856	0.065444	0.051904	0	0	0
ENST00000217195	ENSG00000101220	C20orf27	protein_coding	2.18899	1.95344	0.094597	6.09757	3.0143	0.197657
ENST00000217233	ENSG00000101255	TRIB3	protein_coding	0.724816	1.27139	0.797785	4.18527	0.79579	2.18761
ENST00000217244	ENSG00000101266	CSNK2A1	protein_coding	1.09266	0.125989	0.884619	0.846795	0.186829	0.299316
ENST00000217246	ENSG00000172264	MACROD2	protein_coding	0.058173	0	0	0.017291	0.108171	0.011345
ENST00000217254	ENSG00000101276	SLC52A3	protein_coding	0	0	0	0	0	0
ENST00000217260	ENSG00000101282	RSPO4	protein_coding	0	0	0.118844	0.145126	0.203939	0
ENST00000217270	ENSG00000101292	PROKR2	protein_coding	0	0	0	0	0	0
ENST00000217289	ENSG00000101311	FERMT1	protein_coding	0	0.048936	0	0	0	0
ENST00000217305	ENSG00000101327	PDYN	protein_coding	0	0	0	0	0	0
ENST00000217315	ENSG00000101337	TM9SF4	protein_coding	8.56306	3.76493	10.5472	13.2605	4.88496	6.24163
ENST00000217320	ENSG00000101342	TLDC2	protein_coding	2.52532	2.08688	2.40166	1.7873	2.18279	1.69968
ENST00000217381	ENSG00000101400	SNTA1	protein_coding	3.15958	2.86409	2.51229	3.84216	2.29499	2.50482
ENST00000217386	ENSG00000101405	OXT	protein_coding	0.797782	0.290457	0.622226	0.863271	0.267191	0.302275
ENST00000217398	ENSG00000101417	PXMP4	protein_coding	0.145593	0.292473	0.124461	0.147289	0	0.081615
ENST00000217402	ENSG00000101421	CHMP4B	protein_coding	18.9522	17.2292	19.0186	20.2293	20.7524	18.2365
ENST00000217407	ENSG00000129988	LBP	protein_coding	0	0	0	0	0	0
ENST00000217420	ENSG00000101438	SLC32A1	protein_coding	0	0	0	0.099921	0.400368	0.066036
ENST00000217423	ENSG00000101441	CST4	protein_coding	0	0	0	0	0	0
ENST00000217425	ENSG00000101443	WFDC2	protein_coding	0	0	0	0	0	0
ENST00000217426	ENSG00000101444	AHCY	protein_coding	6.65212	7.93111	4.41288	13.4267	8.68714	9.15302
ENST00000217428	ENSG00000101446	SPINT3	protein_coding	0	0	0	0.053305	0	0
ENST00000217446	ENSG00000101464	PIGU	protein_coding	5.39325	5.82442	3.5872	7.18883	5.19161	7.78745
ENST00000217455	ENSG00000101473	ACOT8	protein_coding	7.74772	8.9457	9.36895	10.831	6.62748	7.73928
ENST00000217456	ENSG00000101474	APMAP	protein_coding	20.0549	17.4334	12.1082	22.476	16.2422	16.6429
ENST00000217515	ENSG00000091164	TXNL1	protein_coding	2.65895	1.88923	2.40272	1.26577	2.48622	2.06399
ENST00000217652	ENSG00000101608	MYL12A	protein_coding	126.367	90.1797	49.0833	111.351	90.4212	136.538
ENST00000217740	ENSG00000101695	RNF125	protein_coding	47.7717	39.9757	52.8479	25.9557	50.3787	24.7523
ENST00000217800	ENSG00000101751	POLI	protein_coding	0	0	0	0	0	0
ENST00000217885	ENSG00000007952	NOX1	protein_coding	0	0	0	0	0	0
ENST00000217893	ENSG00000273841	TAF9	protein_coding	7.0625	7.59733	17.5543	5.29364	9.18233	7.44857
ENST00000217901	ENSG00000067829	IDH3G	protein_coding	6.0549	7.11136	5.91366	12.0227	8.70821	12.2716
ENST00000217909	ENSG00000077713	SLC25A43	protein_coding	1.38848	0.950788	1.01003	1.98949	1.65384	1.51756
ENST00000217926	ENSG00000123569	H2BFWT	protein_coding	0	0	0	0	0	0
ENST00000217939	ENSG00000101825	MXRA5	protein_coding	0	0	0	0	0	0
ENST00000217957	ENSG00000101842	VSIG1	protein_coding	0	1.67889	2.89036	2.23398	0	6.13646
ENST00000217958	ENSG00000101843	PSMD10	protein_coding	9.06517	9.33738	6.40384	5.61476	8.50993	5.93017
ENST00000217961	ENSG00000101846	STS	protein_coding	0.500122	0.933861	0.56548	1.26375	0.779321	1.11819
ENST00000217964	ENSG00000101849	TBL1X	protein_coding	0.342438	2.11901	0.664279	0.933984	0.934875	2.21479
ENST00000217971	ENSG00000101856	PGRMC1	protein_coding	8.565	9.94368	0.63594	7.97258	7.98244	0.449224
ENST00000217999	ENSG00000101883	RHOXF1	protein_coding	0	0.326693	0	0.149718	0.173141	0.650831
ENST00000218004	ENSG00000101888	NXT2	protein_coding	0	0	0	0	0	0
ENST00000218006	ENSG00000101890	GUCY2F	protein_coding	0	0	0	0	0	0
ENST00000218008	ENSG00000101892	ATP1B4	protein_coding	0	0	0	0	0	0
ENST00000218032	ENSG00000101916	TLR8	protein_coding	0.381077	0.348954	0.11156	0.656968	0.634701	0.724366
ENST00000218056	ENSG00000101940	WDR13	protein_coding	8.5869	3.57173	5.27466	12.7106	7.42946	10.1107
ENST00000218068	ENSG00000101951	PAGE4	protein_coding	0	0	0	0	0	0
ENST00000218075	ENSG00000101958	GLRA2	protein_coding	0	0	0	0	0	0
ENST00000218089	ENSG00000101972	STAG2	protein_coding	31.7917	17.9394	19.4285	14.298	19.2841	14.6655
ENST00000218099	ENSG00000101981	F9	protein_coding	0	0	0	0	0	0
ENST00000218104	ENSG00000101986	ABCD1	protein_coding	3.27248	3.08754	2.01008	6.70418	3.28698	5.43898
ENST00000218147	ENSG00000085185	BCORL1	protein_coding	1.03848	1.16875	0.415151	1.72283	0.286353	1.20884
ENST00000218176	ENSG00000102057	KCND1	protein_coding	0.815206	0.570412	0.653455	1.00129	0.574756	0.940994
ENST00000218197	ENSG00000102078	SLC25A14	protein_coding	0	1.71099	1.6299	0.540433	0.331123	0.949688
ENST00000218200	ENSG00000102081	FMR1	protein_coding	0.454197	9.69263	5.80797	7.14954	10.9463	10.305
ENST00000218224	ENSG00000102103	PQBP1	protein_coding	5.19061	2.11309	6.5464	6.38026	3.51122	5.41603
ENST00000218230	ENSG00000102109	PCSK1N	protein_coding	1.52826	1.49032	0.742497	2.95125	1.54407	2.48365
ENST00000218249	ENSG00000102128	RAB40AL	protein_coding	0.881096	0.425894	1.36848	0.932217	1.08669	0.420309
ENST00000218316	ENSG00000102195	GPR50	protein_coding	0	0	0	0	0	0
ENST00000218340	ENSG00000102218	RP2	protein_coding	4.8125	4.66739	3.20837	6.09886	6.11305	4.90653
ENST00000218348	ENSG00000102226	USP11	protein_coding	10.123	12.7591	14.7531	10.9016	16.0944	13.1978
ENST00000218364	ENSG00000102241	HTATSF1	protein_coding	4.89361	7.66805	9.2362	9.34793	9.805	4.20739
ENST00000218388	ENSG00000102265	TIMP1	protein_coding	12.9015	13.2509	10.9257	16.7236	9.62074	15.0951
ENST00000218432	ENSG00000102309	PIN4	protein_coding	0.863396	0.042605	0.354452	0.384243	0.466338	1.20253
ENST00000218436	ENSG00000102313	ITIH6	protein_coding	0	0	0	0	0.008881	0
ENST00000218439	ENSG00000102316	MAGED2	protein_coding	0	0	0.607178	0	0	0.581058
ENST00000218516	ENSG00000102393	GLA	protein_coding	2.57333	2.64496	1.74785	5.2123	2.96312	4.3956
ENST00000218548	ENSG00000075673	ATP12A	protein_coding	0	0	0	0	0	0
ENST00000218652	ENSG00000102471	NDFIP2	protein_coding	0	0	0	0	0	0.169089
ENST00000218721	ENSG00000102539	MLNR	protein_coding	0	0	0	0	0	0
ENST00000218758	ENSG00000102575	ACP5	protein_coding	1.48032	1.68367	0.634292	0.725544	1.46895	0.013693
ENST00000218789	ENSG00000102606	ARHGEF7	protein_coding	9.69113	1.10322	0.7298	0.449976	3.71546	1.35661
ENST00000218867	ENSG00000102683	SGCG	protein_coding	0	0	0	0	0	0
ENST00000218981	ENSG00000102796	DHRS12	protein_coding	4.24955	4.16414	3.68282	2.67846	2.86226	3.45063
ENST00000219022	ENSG00000102837	OLFM4	protein_coding	0	0	0.019154	0	0	0.058674
ENST00000219054	ENSG00000183747	ACSM2A	protein_coding	0	0	0	0	0	0
ENST00000219066	ENSG00000065057	NTHL1	protein_coding	1.09949	2.58916	1.26497	6.17534	1.66128	3.18322
ENST00000219069	ENSG00000006194	ZNF263	protein_coding	1.924	1.89954	1.77326	2.52326	1.2894	1.6641
ENST00000219070	ENSG00000087245	MMP2	protein_coding	0	0.044566	0	0	0	0
ENST00000219091	ENSG00000122386	ZNF205	protein_coding	0	0	0	0	0	0
ENST00000219097	ENSG00000091651	ORC6	protein_coding	0	0.722727	0.934891	1.40999	1.1279	0.467726
ENST00000219139	ENSG00000125149	C16orf70	protein_coding	2.39271	4.35414	3.23891	6.61885	5.14567	6.78214
ENST00000219150	ENSG00000102879	CORO1A	protein_coding	212.372	233.696	98.3002	328.8	154.735	310.888
ENST00000219162	ENSG00000102891	MT4	protein_coding	0	0	0	0	0	0
ENST00000219168	ENSG00000102897	LYRM1	protein_coding	0.052674	0.018744	0.441603	0.480458	0	0.36698
ENST00000219169	ENSG00000102898	NUTF2	protein_coding	1.75332	5.40364	3.62608	6.51604	4.27014	3.83443
ENST00000219197	ENSG00000102924	CBLN1	protein_coding	0	0	0	0	0	0
ENST00000219204	ENSG00000102931	ARL2BP	protein_coding	27.8359	27.3709	20.3956	9.90239	22.0531	22.0509
ENST00000219207	ENSG00000102934	PLLP	protein_coding	0.483526	0.583823	0	0.466161	0.38492	0.963556
ENST00000219235	ENSG00000102962	CCL22	protein_coding	0	0.011716	0	0.019654	0	0
ENST00000219240	ENSG00000102967	DHODH	protein_coding	0	1.32503	0.45474	2.23277	0.567447	2.25753
ENST00000219244	ENSG00000102970	CCL17	protein_coding	0	0	0	0	0	0
ENST00000219251	ENSG00000102977	ACD	protein_coding	0.006997	0	0	0.462687	0.030081	0
ENST00000219252	ENSG00000102978	POLR2C	protein_coding	23.5127	24.0274	22.2453	20.5652	23.1674	19.2087
ENST00000219255	ENSG00000102981	PARD6A	protein_coding	0	0.420696	0	1.2247	0.802041	0.449399
ENST00000219271	ENSG00000102996	MMP15	protein_coding	0.11454	0.172574	0.080284	0.176111	0.184576	0.333074
ENST00000219281	ENSG00000103005	USB1	protein_coding	3.67939	0.463473	4.16059	9.03787	5.31236	1.22246
ENST00000219299	ENSG00000103021	CCDC113	protein_coding	0.077289	0	0	0.010919	0.031681	0.050008
ENST00000219301	ENSG00000103023	PRSS54	protein_coding	0	0.046473	0	0	0	0
ENST00000219302	ENSG00000103024	NME3	protein_coding	8.97705	4.61062	11.1773	19.6105	2.5059	11.9605
ENST00000219313	ENSG00000103035	PSMD7	protein_coding	28.3809	22.0542	20.9028	17.5999	24.1033	21.231
ENST00000219315	ENSG00000103037	SETD6	protein_coding	2.43328	3.9226	0	5.75458	3.80332	4.43784
ENST00000219320	ENSG00000103042	SLC38A7	protein_coding	0	0.005648	0	1.55639	0.902261	0.0005
ENST00000219322	ENSG00000103044	HAS3	protein_coding	0.567083	0.511589	0.285143	0.5297	0.281654	0.284647
ENST00000219334	ENSG00000103056	SMPD3	protein_coding	1.16243	1.51333	0.545277	1.80254	2.2286	1.51061
ENST00000219343	ENSG00000103064	SLC7A6	protein_coding	10.8888	19.7474	8.96889	15.642	15.6001	19.6768
ENST00000219345	ENSG00000103066	PLA2G15	protein_coding	1.38183	0.690682	2.8851	1.37245	1.44403	0.819374
ENST00000219368	ENSG00000103089	FA2H	protein_coding	0	0	0.105837	0	0	0.044762
ENST00000219400	ENSG00000103121	CMC2	protein_coding	1.10599	0.897407	0.944897	0.869251	0.997442	0.844004
ENST00000219406	ENSG00000185615	PDIA2	protein_coding	0.028955	0	0.105708	0.116579	0	0.047956
ENST00000219409	ENSG00000242173	ARHGDIG	protein_coding	0	0	0	0	0	0
ENST00000219431	ENSG00000103152	MPG	protein_coding	0	0.053981	0	0.043587	0.197766	0.02861
ENST00000219439	ENSG00000103160	HSDL1	protein_coding	5.45364	5.26266	4.8562	4.0771	3.73396	5.88714
ENST00000219454	ENSG00000103175	WFDC1	protein_coding	0.063062	0.365609	0.05296	0	0	0
ENST00000219473	ENSG00000103194	USP10	protein_coding	18.3138	18.2291	20.1225	12.3216	21.2227	22.2828
ENST00000219476	ENSG00000103197	TSC2	protein_coding	0.657345	0	0.201354	0.552522	0.723133	0.525718
ENST00000219478	ENSG00000103199	ZNF500	protein_coding	5.28114	5.54119	5.89048	4.59944	3.82518	5.0468
ENST00000219479	ENSG00000103202	NME4	protein_coding	0	1.50753	0.57747	0.785339	0	2.68791
ENST00000219481	ENSG00000242612	DECR2	protein_coding	1.96223	1.65289	1.31675	0.938745	1.65312	1.59674
ENST00000219535	ENSG00000103254	FAM173A	protein_coding	0	0	0	1.1952	0.461473	1.85241
ENST00000219542	ENSG00000103260	METRN	protein_coding	1.42422	1.28615	0.666035	1.72941	0.703263	1.96241
ENST00000219548	ENSG00000103266	STUB1	protein_coding	11.3218	16.2765	9.64085	13.8761	8.86833	11.5643
ENST00000219551	ENSG00000103269	RHBDL1	protein_coding	0	0	2.51212	0	0	1.65935
ENST00000219596	ENSG00000103313	MEFV	protein_coding	1.50712	2.05761	0.723593	11.799	3.38974	4.32545
ENST00000219599	ENSG00000103316	CRYM	protein_coding	0.098101	0.359214	0	0.039134	0.697111	0.1117
ENST00000219611	ENSG00000103326	CAPN15	protein_coding	15.7755	18.5323	13.6142	31.598	17.2026	24.1914
ENST00000219660	ENSG00000103375	AQP8	protein_coding	0	0.431288	0.644695	0	0.427164	0
ENST00000219689	ENSG00000103404	USP31	protein_coding	1.40824	1.66705	1.3122	1.41393	1.49369	1.51649
ENST00000219700	ENSG00000103415	HMOX2	protein_coding	0	0	0	0	0	0
ENST00000219746	ENSG00000103460	TOX3	protein_coding	0	0	0	0	0	0
ENST00000219782	ENSG00000103495	MAZ	protein_coding	8.74991	10.0139	7.29351	17.8677	7.68761	10.4824
ENST00000219789	ENSG00000103502	CDIPT	protein_coding	3.59127	3.40919	3.51787	7.44846	3.29099	5.22634
ENST00000219794	ENSG00000103507	BCKDK	protein_coding	0.468326	1.28415	0.972199	1.79554	1.08809	1.32858
ENST00000219797	ENSG00000103510	KAT8	protein_coding	5.01296	2.75561	4.78432	2.67418	3.64909	4.00722
ENST00000219821	ENSG00000103534	TMC5	protein_coding	0	0	0	0	0	0
ENST00000219833	ENSG00000103546	SLC6A2	protein_coding	0	0	0	0	0	0
ENST00000219837	ENSG00000103550	KNOP1	protein_coding	3.55508	3.37271	2.76546	3.40445	2.62414	4.13136
ENST00000219905	ENSG00000174197	MGA	protein_coding	3.13398	1.32102	1.50553	0.563695	0.146364	0.907018
ENST00000219919	ENSG00000103569	AQP9	protein_coding	0.529579	0.823695	0.392353	3.59298	0.522738	0.710963
ENST00000220003	ENSG00000103653	CSK	protein_coding	13.5557	12.1222	11.6862	51.004	46.4938	17.975
ENST00000220058	ENSG00000103707	MTFMT	protein_coding	1.93897	2.42006	1.96331	2.0143	1.82162	2.46922
ENST00000220062	ENSG00000103710	RASL12	protein_coding	0	0	0	0	0	0
ENST00000220166	ENSG00000103811	CTSH	protein_coding	6.89616	6.0332	3.47381	8.39449	5.83202	6.06743
ENST00000220244	ENSG00000103888	CEMIP	protein_coding	0	0	0	0	0	0
ENST00000220325	ENSG00000103966	EHD4	protein_coding	5.63145	6.27618	4.73082	6.6869	4.62003	6.39202
ENST00000220420	ENSG00000104055	TGM5	protein_coding	0	0	0	0	0	0
ENST00000220429	ENSG00000104064	GABPB1	protein_coding	7.4838	5.6901	6.28086	3.15145	8.32413	5.16206
ENST00000220478	ENSG00000104112	SCG3	protein_coding	0	0	0	0.017366	0.040165	0
ENST00000220496	ENSG00000104129	DNAJC17	protein_coding	3.57138	4.27779	3.50155	3.67796	3.6755	4.51494
ENST00000220507	ENSG00000104140	RHOV	protein_coding	0	0	0	0	0	0
ENST00000220509	ENSG00000104142	VPS18	protein_coding	12.5439	11.0892	11.2471	11.318	12.4753	9.69669
ENST00000220514	ENSG00000104147	OIP5	protein_coding	0.157749	0.441962	0.227525	1.10212	0.461774	0.895284
ENST00000220531	ENSG00000104164	BLOC1S6	protein_coding	0.997822	1.84397	1.15064	1.47763	0.81833	1.07611
ENST00000220562	ENSG00000012232	EXTL3	protein_coding	3.24423	3.84111	1.61353	6.56478	3.33874	4.91485
ENST00000220584	ENSG00000079459	FDFT1	protein_coding	1.10817	12.1612	3.96176	0.700148	8.22672	3.23512
ENST00000220592	ENSG00000123908	AGO2	protein_coding	16.7266	18.5041	22.5169	17.4491	17.9165	18.1983
ENST00000220597	ENSG00000076641	PAG1	protein_coding	51.5794	58.5112	55.5949	43.7689	47.5851	50.601
ENST00000220616	ENSG00000042832	TG	protein_coding	0.603737	0.540011	0.212791	0.650974	0.891533	0.326082
ENST00000220659	ENSG00000104221	BRF2	protein_coding	7.87724	8.05357	6.66081	5.75486	5.87241	4.75608
ENST00000220669	ENSG00000104231	ZFAND1	protein_coding	1.93077	0.203545	0.14608	0.173766	0.095822	3.10067
ENST00000220676	ENSG00000104237	RP1	protein_coding	0	0	0	0	0	0
ENST00000220751	ENSG00000104312	RIPK2	protein_coding	7.36882	5.40666	3.46131	6.955	7.32327	5.40308
ENST00000220763	ENSG00000104324	CPQ	protein_coding	9.09013	7.76148	8.46562	4.92652	11.2246	7.32296
ENST00000220764	ENSG00000104325	DECR1	protein_coding	8.59833	16.7167	10.83	20.1761	7.69186	12.0887
ENST00000220772	ENSG00000104332	SFRP1	protein_coding	0	0	0	0	0	0
ENST00000220809	ENSG00000104368	PLAT	protein_coding	0.373701	0.142761	0.210183	0.225896	0.185468	0.074874
ENST00000220812	ENSG00000104371	DKK4	protein_coding	0	0	0	0	0	0
ENST00000220822	ENSG00000104381	GDAP1	protein_coding	1.94452	2.10621	1.57003	2.06697	1.91244	2.31026
ENST00000220847	ENSG00000129292	PHF20L1	protein_coding	0.059499	0	0	0.036899	2.56801	3.2e-05
ENST00000220849	ENSG00000104408	EIF3E	protein_coding	144.549	144.233	113.487	110.572	94.9849	90.4661
ENST00000220853	ENSG00000104412	EMC2	protein_coding	7.52723	8.14905	9.92482	3.75525	9.09472	8.22293
ENST00000220856	ENSG00000104415	WISP1	protein_coding	0	0	0	0	0	0
ENST00000220876	ENSG00000104435	STMN2	protein_coding	0	0	0	0	0	0
ENST00000220888	ENSG00000104447	TRPS1	protein_coding	0	4.18725	0	1.37419	6.65289	1.74725
ENST00000220913	ENSG00000104472	CHRAC1	protein_coding	6.34888	5.75477	7.13537	6.10779	8.42609	6.2853
ENST00000220931	ENSG00000104490	NCALD	protein_coding	0	0	0	0	0	0
ENST00000220940	ENSG00000104499	GML	protein_coding	0.413908	0	0	0.11585	0.249967	0
ENST00000220959	ENSG00000104517	UBR5	protein_coding	24.5864	22.9403	31.6823	24.5823	21.7867	20.1196
ENST00000220966	ENSG00000104524	PYCR3	protein_coding	0.138828	0.285662	0.136259	0.116781	0.023522	1.97208
ENST00000221086	ENSG00000104643	MTMR9	protein_coding	7.26596	7.05098	6.34951	5.01276	7.13995	5.75976
ENST00000221114	ENSG00000104671	DCTN6	protein_coding	11.7096	10.6049	16.8432	3.60591	18.0726	7.29838
ENST00000221130	ENSG00000104687	GSR	protein_coding	9.87096	11.3052	7.82098	22.2316	11.3482	18.9966
ENST00000221132	ENSG00000104689	TNFRSF10A	protein_coding	14.3838	16.8707	17.4799	16.2379	14.4395	19.4007
ENST00000221138	ENSG00000104695	PPP2CB	protein_coding	4.8559	4.40765	5.81757	5.86421	3.61698	7.15518
ENST00000221166	ENSG00000104722	NEFM	protein_coding	0.097004	0.041849	0.031909	0	0.033121	0.105707
ENST00000221200	ENSG00000104756	KCTD9	protein_coding	7.8857	7.31498	7.35592	6.67184	9.28021	7.93775
ENST00000221222	ENSG00000051128	HOMER3	protein_coding	0	0	0	0	0	0
ENST00000221232	ENSG00000088038	CNOT3	protein_coding	0.505153	0.653054	0.204355	0.37452	0.451838	0.038486
ENST00000221233	ENSG00000077348	EXOSC5	protein_coding	4.42615	5.87715	3.80054	11.47	3.87014	7.15973
ENST00000221249	ENSG00000032444	PNPLA6	protein_coding	5.65498	2.40282	1.5593	0	3.30706	22.1517
ENST00000221264	ENSG00000011422	PLAUR	protein_coding	0	0.739241	0	1.57013	1.22361	0
ENST00000221265	ENSG00000006712	PAF1	protein_coding	5.69483	7.61897	6.20457	9.33508	7.99267	12.4633
ENST00000221283	ENSG00000076944	STXBP2	protein_coding	16.4651	16.4441	17.961	21.4736	18.6517	27.1819
ENST00000221307	ENSG00000186529	CYP4F3	protein_coding	0	0.01552	0.092854	0.35297	0.058575	0.014264
ENST00000221315	ENSG00000256087	ZNF432	protein_coding	3.53505	0	0	0	0	0
ENST00000221327	ENSG00000167384	ZNF180	protein_coding	0.200027	0.288175	0.16884	0.177137	1.38616	0.366323
ENST00000221355	ENSG00000128000	ZNF780B	protein_coding	0.78667	0.057737	2.31734	2.06533	1.54182	3.00371
ENST00000221363	ENSG00000104774	MAN2B1	protein_coding	0	0	0	0	0	0
ENST00000221399	ENSG00000104804	TULP2	protein_coding	0.056244	0	0	0	0.03522	0.08883
ENST00000221403	ENSG00000104808	DHDH	protein_coding	0.157258	0.032422	0.455167	0	0.071057	0.181492
ENST00000221418	ENSG00000104823	ECH1	protein_coding	17.5247	19.9561	13.9227	30.0608	14.5747	26.983
ENST00000221419	ENSG00000104824	HNRNPL	protein_coding	72.6754	77.3614	79.1604	70.2968	85.3444	69.1615
ENST00000221421	ENSG00000104826	LHB	protein_coding	0	0	0	0	0	0.375627
ENST00000221431	ENSG00000104835	SARS2	protein_coding	3.00452	2.28622	2.0323	5.57811	2.89618	2.43565
ENST00000221444	ENSG00000104848	KCNA7	protein_coding	0	0	0	0	0	0
ENST00000221448	ENSG00000104852	SNRNP70	protein_coding	16.3975	14.4529	19.2307	13.7443	20.4611	20.4518
ENST00000221452	ENSG00000104856	RELB	protein_coding	1.96582	0.46697	9.7452	0.179766	3.96715	0.749426
ENST00000221455	ENSG00000104859	CLASRP	protein_coding	10.4594	13.8562	9.78312	8.54153	14.86	10.3923
ENST00000221459	ENSG00000104863	LIN7B	protein_coding	0.333582	1.66436	1.55223	1.92249	1.29805	1.65097
ENST00000221462	ENSG00000104866	PPP1R37	protein_coding	4.90259	5.50491	6.011	8.87933	5.22375	8.51279
ENST00000221466	ENSG00000104870	FCGRT	protein_coding	2.51746	1.08256	1.5836	8.92789	10.7513	11.0987
ENST00000221476	ENSG00000104879	CKM	protein_coding	0	0.026779	0.100121	0	0	0
ENST00000221480	ENSG00000104883	PEX11G	protein_coding	0.755531	1.75232	1.36339	3.67996	0.708381	1.00556
ENST00000221485	ENSG00000104888	SLC17A7	protein_coding	0	0	0.057528	0	0	0
ENST00000221486	ENSG00000104889	RNASEH2A	protein_coding	0.883955	0.944896	0.264524	2.20865	0.691831	1.41903
ENST00000221494	ENSG00000104897	SF3A2	protein_coding	17.7845	22.0737	22.2473	27.6976	21.7092	26.0478
ENST00000221496	ENSG00000104899	AMH	protein_coding	0.619942	0.978161	1.48151	1.01195	1.00951	0.885764
ENST00000221498	ENSG00000104901	DKKL1	protein_coding	0	0	0	0	0	0
ENST00000221504	ENSG00000104907	TRMT1	protein_coding	8.3457	6.56996	7.41976	9.72085	8.97987	12.5075
ENST00000221515	ENSG00000104918	RETN	protein_coding	0	0	0	0.321657	0	0.866957
ENST00000221538	ENSG00000104941	RSPH6A	protein_coding	0.248543	0.29454	0.286225	0.288504	0.227161	0.138418
ENST00000221543	ENSG00000104946	TBC1D17	protein_coding	2.96929	2.9912	8.92601	17.802	3.879	14.9112
ENST00000221554	ENSG00000104957	CCDC130	protein_coding	8.35253	9.06708	10.7974	12.2009	11.8511	10.5342
ENST00000221561	ENSG00000104964	AES	protein_coding	1.4488	2.1317	2.57139	2.4642	2.72327	2.20507
ENST00000221566	ENSG00000104969	SGTA	protein_coding	7.38818	8.51932	8.97735	16.7505	7.6269	11.6932
ENST00000221573	ENSG00000104976	SNAPC2	protein_coding	0.239832	0.069779	1.60747	0.373036	0.216425	0.178771
ENST00000221576	ENSG00000104979	C19orf53	protein_coding	6.50811	0	0	0	0	0
ENST00000221665	ENSG00000179943	FIZ1	protein_coding	1.48996	2.38484	1.46282	4.06827	1.96298	2.71729
ENST00000221671	ENSG00000105072	C19orf44	protein_coding	0.318671	0.249512	0.329993	0.645072	0.412571	0.676457
ENST00000221700	ENSG00000186115	CYP4F2	protein_coding	0	0	0	0	0	0
ENST00000221730	ENSG00000105131	EPHX3	protein_coding	0.026942	0	0.193312	0.03149	0.054228	0.183145
ENST00000221735	ENSG00000105136	ZNF419	protein_coding	0	0	0	0.118548	1.29145	0
ENST00000221742	ENSG00000105143	SLC1A6	protein_coding	0	0	0	0	0	0
ENST00000221770	ENSG00000105171	POP4	protein_coding	1.57144	1.55537	1.12148	1.54687	2.40273	1.65462
ENST00000221797	ENSG00000105198	LGALS13	protein_coding	0	0	0	0	0	0
ENST00000221801	ENSG00000105202	FBL	protein_coding	49.3152	49.3639	24.8012	42.9113	32.4039	38.0037
ENST00000221804	ENSG00000105205	CLC	protein_coding	0.069522	0.463191	0	0.539706	1.09347	0.387542
ENST00000221847	ENSG00000105246	EBI3	protein_coding	0	0	0	0.337019	0	0
ENST00000221855	ENSG00000105254	TBCB	protein_coding	5.3855	6.7167	4.05848	11.4559	4.69099	10.5155
ENST00000221856	ENSG00000105255	FSD1	protein_coding	0.368134	0.57774	0.149922	0.786519	0.357525	0.676273
ENST00000221859	ENSG00000105258	POLR2I	protein_coding	3.38507	4.1149	3.10608	4.83337	2.67154	2.90784
ENST00000221891	ENSG00000105290	APLP1	protein_coding	0.050458	0.064354	0.102738	0	0.013498	0.030808
ENST00000221899	ENSG00000105298	CACTIN	protein_coding	0	0	0	0	0.084346	0.140808
ENST00000221922	ENSG00000105321	CCDC9	protein_coding	2.739	5.90991	4.71881	7.84748	5.96042	5.36266
ENST00000221930	ENSG00000105329	TGFB1	protein_coding	78.4927	78.304	79.937	106.791	90.8864	78.7131
ENST00000221943	ENSG00000105341	DMAC2	protein_coding	0.670838	0.207163	5.15806	0.344245	0.159812	0.133569
ENST00000221954	ENSG00000105352	CEACAM4	protein_coding	0.917582	1.29256	2.03701	0.999875	0.754915	1.364
ENST00000221957	ENSG00000105355	PLIN3	protein_coding	9.03017	9.85405	6.20775	10.4974	10.5482	8.94383
ENST00000221972	ENSG00000105369	CD79A	protein_coding	2.56871	1.25339	0.990372	2.47929	2.95606	1.47444
ENST00000221973	ENSG00000105370	LIM2	protein_coding	0	0	0.062892	0	0	0.057639
ENST00000221975	ENSG00000105372	RPS19	protein_coding	0	0	0	0	0	0
ENST00000221978	ENSG00000105374	NKG7	protein_coding	74.6523	38.4255	32.4692	65.9432	104.239	44.9844
ENST00000221980	ENSG00000105376	ICAM5	protein_coding	0.09667	0.087658	0.031688	1.02222	0.148533	0
ENST00000221992	ENSG00000105388	CEACAM5	protein_coding	0	0	0	0	0	0
ENST00000221996	ENSG00000105392	CRX	protein_coding	0	0	0	0	0	0
ENST00000222002	ENSG00000105398	SULT2A1	protein_coding	0	0	0	0	0	0
ENST00000222005	ENSG00000105401	CDC37	protein_coding	25.0985	26.7744	26.0894	35.0711	25.8637	32.9782
ENST00000222008	ENSG00000105404	RABAC1	protein_coding	31.2452	25.9462	17.4354	22.9524	23.0478	26.7612
ENST00000222032	ENSG00000105427	CNFN	protein_coding	0	0	0	0	0	0
ENST00000222033	ENSG00000105428	ZNRF4	protein_coding	0	0	0	0	0	0
ENST00000222115	ENSG00000105509	HAS1	protein_coding	0	0	0	0	0	0
ENST00000222120	ENSG00000105514	RAB3D	protein_coding	2.60454	3.28216	2.27416	7.87099	3.39154	3.81219
ENST00000222122	ENSG00000105516	DBP	protein_coding	3.90894	8.68395	8.07891	8.87092	4.81402	6.55383
ENST00000222139	ENSG00000187266	EPOR	protein_coding	0.284679	0.455303	0.455244	0.818779	0.108207	0.698844
ENST00000222145	ENSG00000105538	RASIP1	protein_coding	0.027899	0.114694	0.094339	0.179059	0	0.069063
ENST00000222157	ENSG00000105550	FGF21	protein_coding	0	0	0	0	0	0
ENST00000222190	ENSG00000105583	WDR83OS	protein_coding	0	0	0	0	0.06938	0
ENST00000222212	ENSG00000105605	CACNG7	protein_coding	0	0	0	0	0	0
ENST00000222214	ENSG00000105607	GCDH	protein_coding	2.41429	3.61326	2.56229	1.26362	1.19016	1.88713
ENST00000222219	ENSG00000105612	DNASE2	protein_coding	10.0874	10.4529	7.22592	13.8471	8.59284	12.2407
ENST00000222224	ENSG00000105617	LENG1	protein_coding	3.77063	5.6863	3.973	3.69803	5.27359	5.08156
ENST00000222247	ENSG00000105640	RPL18A	protein_coding	63.099	41.5197	56.9319	87.7498	38.5426	38.7379
ENST00000222248	ENSG00000105641	SLC5A5	protein_coding	1.01182	0.983788	0.985798	0.853638	0.799171	1.15862
ENST00000222249	ENSG00000105642	KCNN1	protein_coding	0	0	0.047181	0	0.068718	0.01563
ENST00000222250	ENSG00000105643	ARRDC2	protein_coding	12.5326	16.1937	13.6331	15.5128	16.137	11.6142
ENST00000222254	ENSG00000105647	PIK3R2	protein_coding	3.06907	3.70717	2.89591	7.29766	3.84978	5.36369
ENST00000222256	ENSG00000105649	RAB3A	protein_coding	1.35326	1.90928	2.14022	0.617052	0.578028	1.25012
ENST00000222266	ENSG00000205155	PSENEN	protein_coding	0	0	0	0	0	2.22645
ENST00000222271	ENSG00000105664	COMP	protein_coding	0	0	0	0	0	0
ENST00000222275	ENSG00000105668	UPK1A	protein_coding	0	0	0	0	0	0
ENST00000222284	ENSG00000105677	TMEM147	protein_coding	6.43859	8.76541	7.30928	12.5536	9.40356	13.0251
ENST00000222286	ENSG00000105679	GAPDHS	protein_coding	0.092197	0.181673	0.075813	0.284783	0.115644	0.061184
ENST00000222304	ENSG00000105697	HAMP	protein_coding	0	0	0	0	0	0
ENST00000222305	ENSG00000105698	USF2	protein_coding	8.0471	11.2407	9.90561	11.8424	8.33541	10.4003
ENST00000222307	ENSG00000105700	KXD1	protein_coding	0.591568	0.818033	0.62511	0.338684	1.0649	0.299941
ENST00000222308	ENSG00000105701	FKBP8	protein_coding	11.8184	11.1319	7.29043	10.8088	4.4874	41.8748
ENST00000222329	ENSG00000105722	ERF	protein_coding	6.72617	8.43209	8.18541	3.69278	3.46911	5.57107
ENST00000222330	ENSG00000105723	GSK3A	protein_coding	4.42211	3.34333	2.88057	7.68815	2.79932	5.45716
ENST00000222339	ENSG00000105732	ZNF574	protein_coding	0	0	0	0	0	0
ENST00000222345	ENSG00000105738	SIPA1L3	protein_coding	6.1612	7.80511	8.01093	10.7274	8.11773	9.07542
ENST00000222374	ENSG00000105767	CADM4	protein_coding	0.192183	0.307293	0.045284	0.434965	0.405165	0.470894
ENST00000222381	ENSG00000005421	PON1	protein_coding	0	0	0	0	0.014402	0
ENST00000222382	ENSG00000021461	CYP3A43	protein_coding	0	0	0	0	0	0
ENST00000222388	ENSG00000285292	ABCF2	protein_coding	1.36717	0.663593	0.72943	1.07581	0.728355	0.579706
ENST00000222390	ENSG00000019991	HGF	protein_coding	0	0.042149	0	0.170951	0.061982	0.056527
ENST00000222399	ENSG00000091136	LAMB1	protein_coding	0	0.012787	0.025991	0	0	0
ENST00000222402	ENSG00000078967	UBE2D4	protein_coding	2.5694	2.83837	2.82129	3.34766	2.94013	3.59881
ENST00000222462	ENSG00000002745	WNT16	protein_coding	0	0	0	0	0	0
ENST00000222481	ENSG00000158516	CPA2	protein_coding	0	0	0	0	0	0
ENST00000222482	ENSG00000128510	CPA4	protein_coding	0.050469	0.058944	0.119953	0	0	0
ENST00000222511	ENSG00000105793	GTPBP10	protein_coding	2.14488	3.03465	2.16773	2.25039	2.16449	3.36613
ENST00000222543	ENSG00000105825	TFPI2	protein_coding	0	0.030172	0	0	0	0
ENST00000222547	ENSG00000105829	BET1	protein_coding	2.81233	2.50113	2.67068	1.18682	2.46488	3.99407
ENST00000222553	ENSG00000105835	NAMPT	protein_coding	8.02162	8.70371	8.31062	16.7791	14.3191	10.101
ENST00000222567	ENSG00000105849	TWISTNB	protein_coding	10.2555	8.96769	7.63057	4.34729	8.2911	6.34351
ENST00000222572	ENSG00000105854	PON2	protein_coding	0	0.0042	0	0.114838	0.179428	0
ENST00000222573	ENSG00000105855	ITGB8	protein_coding	0	0.027907	0.07808	0	0.060809	0.025408
ENST00000222574	ENSG00000105856	HBP1	protein_coding	38.247	20.1278	32.0039	13.5806	28.8169	17.5018
ENST00000222584	ENSG00000105866	SP4	protein_coding	16.8626	15.6112	14.2561	12.0004	13.0937	16.4404
ENST00000222597	ENSG00000105879	CBLL1	protein_coding	0.218528	0	0	0.426615	0	1.25328
ENST00000222598	ENSG00000105880	DLX5	protein_coding	0	0	0	0	0	0
ENST00000222644	ENSG00000105926	MPP6	protein_coding	4.3512	3.79166	0.317172	1.65309	0.656648	0.628418
ENST00000222673	ENSG00000105953	OGDH	protein_coding	8.10404	20.0077	13.8927	42.613	17.1034	33.7423
ENST00000222674	ENSG00000105954	NPVF	protein_coding	0	0	0	0	0	0
ENST00000222690	ENSG00000105968	H2AFV	protein_coding	35.7765	38.2677	40.4835	24.1134	37.0532	30.1498
ENST00000222693	ENSG00000105971	CAV2	protein_coding	0.088403	0.091825	0	0	0	0
ENST00000222718	ENSG00000105996	HOXA2	protein_coding	0	0	0	0.083157	0	0
ENST00000222725	ENSG00000106003	LFNG	protein_coding	13.0636	31.268	30.708	98.1324	32.4917	47.2336
ENST00000222726	ENSG00000106004	HOXA5	protein_coding	0.058639	0	0	0.171275	0	0
ENST00000222728	ENSG00000106006	HOXA6	protein_coding	0	0	0	0	0	0
ENST00000222747	ENSG00000106025	TSPAN12	protein_coding	0.069685	0	0	0	0	0
ENST00000222753	ENSG00000106031	HOXA13	protein_coding	0	0	0	0	0	0
ENST00000222761	ENSG00000106038	EVX1	protein_coding	0	0	0	0	0	0
ENST00000222792	ENSG00000106069	CHN2	protein_coding	1.18502	0.636358	0.657159	1.84925	1.27872	0.631907
ENST00000222800	ENSG00000106077	ABHD11	protein_coding	2.5828	1.04464	2.44398	2.3982	0.912909	2.86095
ENST00000222803	ENSG00000106080	FKBP14	protein_coding	1.01543	1.51737	1.30051	0.797392	1.55618	1.68169
ENST00000222812	ENSG00000106089	STX1A	protein_coding	0.904153	0.949916	1.00666	2.29699	0.688423	1.45822
ENST00000222823	ENSG00000106100	NOD1	protein_coding	6.91157	7.32307	6.68534	8.31712	7.79352	9.84836
ENST00000222902	ENSG00000106178	CCL24	protein_coding	0	0	0	0	0	0
ENST00000222969	ENSG00000106245	BUD31	protein_coding	19.3609	2.59298	11.2071	16.5591	12.604	12.5041
ENST00000222982	ENSG00000106258	CYP3A5	protein_coding	0	0	0.015578	0	0	0
ENST00000222990	ENSG00000106266	SNX8	protein_coding	1.12459	1.19434	1.04075	3.61913	1.57869	2.16238
ENST00000223023	ENSG00000106299	WASL	protein_coding	7.65372	7.93556	9.01871	5.58924	9.02036	7.70628
ENST00000223026	ENSG00000106302	HYAL4	protein_coding	0	0	0.106584	0	0	0
ENST00000223028	ENSG00000106304	SPAM1	protein_coding	0	0	0	0	0	0
ENST00000223029	ENSG00000106305	AIMP2	protein_coding	3.98256	2.34556	2.17544	3.84269	2.78439	3.86375
ENST00000223051	ENSG00000106327	TFR2	protein_coding	0	0	0	0	0	0
ENST00000223054	ENSG00000106330	MOSPD3	protein_coding	2.21004	2.0718	1.77011	3.61009	2.46156	2.27375
ENST00000223061	ENSG00000106333	PCOLCE	protein_coding	0.264609	0.585815	0.641086	0.575461	0.793219	0.627462
ENST00000223073	ENSG00000106344	RBM28	protein_coding	2.76132	3.21074	3.2344	3.50118	3.16161	4.19093
ENST00000223095	ENSG00000106366	SERPINE1	protein_coding	0.045841	0.112852	0.026808	0.051852	0	0
ENST00000223114	ENSG00000106384	MOGAT3	protein_coding	0	0	0	0	0	0.026487
ENST00000223122	ENSG00000106392	C1GALT1	protein_coding	1.04744	6.39987	2.63272	0.797658	3.30625	2.12279
ENST00000223127	ENSG00000106397	PLOD3	protein_coding	6.53922	6.37972	3.9447	10.8772	6.32488	8.81323
ENST00000223129	ENSG00000106399	RPA3	protein_coding	4.0499	1.80766	3.06249	4.07001	1.10218	2.68742
ENST00000223136	ENSG00000214253	FIS1	protein_coding	50.0327	37.8915	37.4416	24.5968	27.6019	41.131
ENST00000223145	ENSG00000106415	GLCCI1	protein_coding	11.2977	12.779	11.4962	14.8877	10.0998	15.1737
ENST00000223167	ENSG00000106436	MYL10	protein_coding	0	0	0	0	0	0
ENST00000223190	ENSG00000106459	NRF1	protein_coding	11.0772	9.72303	11.5463	9.89634	10.5741	0
ENST00000223208	ENSG00000106477	CEP41	protein_coding	1.24803	1.26999	1.01698	0.971858	0.60658	1.2998
ENST00000223210	ENSG00000106479	ZNF862	protein_coding	10.0253	12.4193	11.1632	13.0738	10.4523	14.8573
ENST00000223215	ENSG00000106484	MEST	protein_coding	0.988123	0	0	0.212351	0.135956	0.010405
ENST00000223271	ENSG00000106538	RARRES2	protein_coding	0	0	0	0	0	0
ENST00000223273	ENSG00000241127	YAE1D1	protein_coding	2.88599	2.1338	2.45514	1.87329	2.53505	1.14683
ENST00000223293	ENSG00000106560	GIMAP2	protein_coding	29.9054	30.7533	21.6353	29.2934	26.3124	37.1226
ENST00000223321	ENSG00000106588	PSMA2	protein_coding	20.4788	17.667	19.413	21.7181	19.9645	22.1337
ENST00000223324	ENSG00000106591	MRPL32	protein_coding	10.9514	12.4955	9.80804	8.04468	9.81591	10.9607
ENST00000223336	ENSG00000106603	COA1	protein_coding	1.38001	1.44213	1.41634	2.10766	0.026833	1.56882
ENST00000223357	ENSG00000106624	AEBP1	protein_coding	1.86123	2.60262	1.59171	2.46645	2.49154	3.22037
ENST00000223361	ENSG00000106628	POLD2	protein_coding	0	0	0	2.524	0	0.997843
ENST00000223364	ENSG00000106631	MYL7	protein_coding	0	0	0	0	0	0
ENST00000223368	ENSG00000106635	BCL7B	protein_coding	14.8449	17.176	15.3957	20.2922	19.6994	12.0148
ENST00000223369	ENSG00000106636	YKT6	protein_coding	16.3509	12.5089	13.569	12.0001	13.6866	11.9549
ENST00000223398	ENSG00000106665	CLIP2	protein_coding	1.11112	1.67325	0.835919	1.50441	1.09854	0.634207
ENST00000223423	ENSG00000095303	PTGS1	protein_coding	0	0.339819	0	0.364674	0.285078	0.192204
ENST00000223428	ENSG00000081386	ZNF510	protein_coding	0.021742	3.61446	3.14414	1.27675	1.52819	0.011987
ENST00000223459	ENSG00000229809	ZNF688	protein_coding	5.38811	4.46122	4.5702	6.58803	5.42603	6.26879
ENST00000223500	ENSG00000086065	CHMP5	protein_coding	5.93438	6.69562	6.87019	7.40229	7.64483	13.2203
ENST00000223528	ENSG00000106692	FKTN	protein_coding	0	0	2.47899	0	0	0
ENST00000223609	ENSG00000106772	PRUNE2	protein_coding	0	0	0	0	0	0
ENST00000223641	ENSG00000106803	SEC61B	protein_coding	23.3202	18.2367	19.0414	22.9421	18.144	18.6451
ENST00000223642	ENSG00000106804	C5	protein_coding	0.701061	0.96925	0.826928	0.817553	0.806369	0.755592
ENST00000223791	ENSG00000106948	AKNA	protein_coding	3.15495	2.44029	3.38796	7.63428	5.45924	4.10369
ENST00000223795	ENSG00000106952	TNFSF8	protein_coding	36.6459	24.5184	38.4605	16.7797	54.8947	23.7721
ENST00000223836	ENSG00000106992	AK1	protein_coding	0.143275	0	0	0.046376	0.084164	0.056843
ENST00000223862	ENSG00000107018	RLN1	protein_coding	0	0.347947	0.3841	0.148828	0.234996	0.62091
ENST00000223864	ENSG00000107020	PLGRKT	protein_coding	8.72729	9.54129	5.41693	9.88268	6.57657	9.09413
ENST00000223865	ENSG00000107021	TBC1D13	protein_coding	0	0	0	1.23794	0	0
ENST00000223951	ENSG00000107105	ELAVL2	protein_coding	0	0	0	0	0	0
ENST00000224073	ENSG00000107223	EDF1	protein_coding	6.28103	18.5156	10.5672	12.3118	11.735	16.735
ENST00000224140	ENSG00000107290	SETX	protein_coding	27.3659	25.9574	22.237	22.5664	23.6225	34.4962
ENST00000224181	ENSG00000176919	C8G	protein_coding	0	0	0.12169	0.953535	0.240986	0.71942
ENST00000224237	ENSG00000026025	VIM	protein_coding	340.551	312.201	294.989	395.332	278.829	325.447
ENST00000224337	ENSG00000095585	BLNK	protein_coding	0	0.657022	0.080437	0.739763	0.473085	1.01603
ENST00000224356	ENSG00000095596	CYP26A1	protein_coding	0	0	0	0	0	0
ENST00000224652	ENSG00000107669	ATE1	protein_coding	1.11888	1.67808	1.26478	2.6151	1.81167	0.474036
ENST00000224721	ENSG00000107736	CDH23	protein_coding	1.4449	2.23326	1.90214	2.80209	1.66604	1.73049
ENST00000224756	ENSG00000107771	CCSER2	protein_coding	6e-06	1e-06	6.3e-05	0.000577	0.001104	5e-06
ENST00000224784	ENSG00000107796	ACTA2	protein_coding	0.836751	0.965546	1.68838	1.58727	1.02269	2.00528
ENST00000224807	ENSG00000107819	SFXN3	protein_coding	0	0	0	0	0	0
ENST00000224862	ENSG00000107872	FBXL15	protein_coding	0.019741	3.42532	2.40323	2.32242	3.38268	2.78096
ENST00000224949	ENSG00000107959	PITRM1	protein_coding	7.85192	3.71536	4.23712	2.26202	2.45491	0.480771
ENST00000224950	ENSG00000107960	STN1	protein_coding	11.0398	12.5417	8.15	11.8145	6.8152	16.2864
ENST00000225171	ENSG00000108176	DNAJC12	protein_coding	0	0	0	0	0	0
ENST00000225174	ENSG00000108179	PPIF	protein_coding	8.98175	13.706	13.8441	12.6955	8.86599	11.0178
ENST00000225235	ENSG00000108239	TBC1D12	protein_coding	0.364928	0.230498	0.492617	1.24578	0.92886	0.396588
ENST00000225275	ENSG00000005381	MPO	protein_coding	0	0.012431	0.039899	0.10981	0.090361	0.107855
ENST00000225276	ENSG00000070731	ST6GALNAC2	protein_coding	0.321871	0.147284	0.247684	0.132465	0.113497	0.043938
ENST00000225296	ENSG00000005100	DHX33	protein_coding	2.52629	1.98843	1.89593	3.22165	2.36763	2.84299
ENST00000225298	ENSG00000011260	UTP18	protein_coding	15.493	16.7127	15.7406	13.6909	15.3351	20.825
ENST00000225308	ENSG00000013306	SLC25A39	protein_coding	2.02058	3.00436	2.07313	15.7512	2.52596	5.87957
ENST00000225328	ENSG00000083454	P2RX5	protein_coding	5.02284	0.61806	0.19825	5.12418	0.133845	2.74621
ENST00000225371	ENSG00000121053	EPX	protein_coding	0	0	0.063009	0	0.024042	0
ENST00000225387	ENSG00000108255	CRYBA1	protein_coding	0	0	0.029703	0	0.088286	0
ENST00000225388	ENSG00000108256	NUFIP2	protein_coding	36.3252	34.0968	38.6078	20.0161	33.4463	28.6022
ENST00000225394	ENSG00000108262	GIT1	protein_coding	10.0544	14.3204	7.16976	9.05551	13.0883	15.2153
ENST00000225430	ENSG00000108298	RPL19	protein_coding	432.791	497.049	470.26	632.968	442.419	486.556
ENST00000225441	ENSG00000108309	RUNDC3A	protein_coding	0	0.022685	0	0.038192	0	0
ENST00000225474	ENSG00000108342	CSF3	protein_coding	0	0	0	0	0	0
ENST00000225504	ENSG00000213246	SUPT4H1	protein_coding	1.93451	1.58568	2.10176	1.82747	1.06109	1.42586
ENST00000225512	ENSG00000108379	WNT3	protein_coding	0	0	0	0.017158	0	0
ENST00000225519	ENSG00000197417	SHPK	protein_coding	2.86823	4.7293	4.23952	6.25133	4.36978	6.75153
ENST00000225525	ENSG00000213977	TAX1BP3	protein_coding	5.85029	5.79911	2.23739	8.56773	5.45948	6.1866
ENST00000225538	ENSG00000108405	P2RX1	protein_coding	2.08635	1.84312	0.503182	11.6489	4.00289	4.26817
ENST00000225550	ENSG00000108417	KRT37	protein_coding	0	0	0	0	0	0
ENST00000225567	ENSG00000108433	GOSR2	protein_coding	0	0	0	0.434367	0	0
ENST00000225573	ENSG00000108439	PNPO	protein_coding	0.593513	0	0	1.09713	0.646444	3.991
ENST00000225576	ENSG00000175106	TVP23C	protein_coding	1.52194	2.10767	1.85013	2.33902	1.40319	2.34152
ENST00000225577	ENSG00000108443	RPS6KB1	protein_coding	0.033548	4.90688	15.9463	7.21756	7.86577	9.8774
ENST00000225603	ENSG00000108468	CBX1	protein_coding	3.26437	0	0	7.59415	2.4881	9.8723
ENST00000225609	ENSG00000108474	PIGL	protein_coding	7.01335	5.75933	5.71194	8.71719	2.69132	4.17889
ENST00000225614	ENSG00000108479	GALK1	protein_coding	0	0	1.25468	0	1.9092	0
ENST00000225648	ENSG00000108511	HOXB6	protein_coding	0	0	0	0	0	0
ENST00000225655	ENSG00000108518	PFN1	protein_coding	157.39	93.7989	66.3509	236.892	179.535	182.745
ENST00000225665	ENSG00000108528	SLC25A11	protein_coding	10.3712	11.225	10.0815	18.8204	9.77416	14.6773
ENST00000225688	ENSG00000108551	RASD1	protein_coding	0.192668	0.143726	0.146935	0.651702	0.563037	0.421428
ENST00000225696	ENSG00000108559	NUP88	protein_coding	0.736885	3.26761	1.13829	0.41244	1.95342	1.33906
ENST00000225698	ENSG00000108561	C1QBP	protein_coding	32.3193	34.047	30.0997	45.3568	31.8061	34.6139
ENST00000225719	ENSG00000108582	CPD	protein_coding	9.73656	8.4105	7.60644	7.45198	8.56752	7.54644
ENST00000225724	ENSG00000108587	GOSR1	protein_coding	7.52859	6.51501	9.35749	4.32484	7.08507	5.64078
ENST00000225726	ENSG00000108588	CCDC47	protein_coding	5.23355	5.79628	6.10678	5.58761	6.52241	6.16812
ENST00000225728	ENSG00000108590	MED31	protein_coding	5.59138	4.81443	3.80112	2.94859	4.42938	3.29552
ENST00000225729	ENSG00000108591	DRG2	protein_coding	9.44342	6.66578	10.1227	7.55256	14.6929	3.93483
ENST00000225737	ENSG00000108599	AKAP10	protein_coding	13.3374	13.8019	13.4706	8.78493	13.6135	16.2657
ENST00000225740	ENSG00000108602	ALDH3A1	protein_coding	0	0	0	0	0	0
ENST00000225742	ENSG00000108604	SMARCD2	protein_coding	0.100312	0.086843	0.52222	0.500701	0.211563	0.104974
ENST00000225777	ENSG00000108639	SYNGR2	protein_coding	9.11073	10.8271	8.0707	26.6484	13.8789	15.0364
ENST00000225792	ENSG00000108654	DDX5	protein_coding	316.208	336.529	312.317	300.628	178.217	387.229
ENST00000225805	ENSG00000108666	C17orf75	protein_coding	2.02235	1.73084	1.69932	1.27267	1.84415	2.27438
ENST00000225823	ENSG00000108684	ASIC2	protein_coding	0	0	0	0	0	0
ENST00000225831	ENSG00000108691	CCL2	protein_coding	0	0	0	0	0	0
ENST00000225842	ENSG00000108702	CCL1	protein_coding	0	0	0	0	0	0
ENST00000225844	ENSG00000181374	CCL13	protein_coding	0	0	0	0	0	0
ENST00000225873	ENSG00000108733	PEX12	protein_coding	0.235903	0.235296	0	0	0	0.129793
ENST00000225899	ENSG00000108759	KRT32	protein_coding	0	0	0	0	0	0
ENST00000225916	ENSG00000108773	KAT2A	protein_coding	10.5673	12.6866	12.1469	17.8698	13.6021	17.2813
ENST00000225927	ENSG00000108784	NAGLU	protein_coding	4.57991	2.34524	1.58524	3.15152	2.5797	4.31829
ENST00000225929	ENSG00000108786	HSD17B1	protein_coding	0	0.007775	0	0	0	0
ENST00000225941	ENSG00000108798	ABI3	protein_coding	5.98109	5.07716	2.38729	11.584	8.42646	6.1027
ENST00000225964	ENSG00000108821	COL1A1	protein_coding	0.786398	0.420956	0.541773	0.07047	0.026055	0.059519
ENST00000225969	ENSG00000108826	MRPL27	protein_coding	0.001061	2.18543	2.85366	0.003807	0.000754	1.74237
ENST00000225972	ENSG00000108829	LRRC59	protein_coding	12.274	13.9651	10.8728	15.6862	13.2973	14.4264
ENST00000225983	ENSG00000108840	HDAC5	protein_coding	8.60265	10.4837	0	7.03715	9.04573	5.52534
ENST00000225992	ENSG00000108849	PPY	protein_coding	0	0	0	0	0	0
ENST00000226004	ENSG00000108861	DUSP3	protein_coding	2.75745	1.9637	2.0666	4.60832	3.63484	2.39325
ENST00000226021	ENSG00000108878	CACNG1	protein_coding	0	0.034788	0.202645	0	0	0
ENST00000226067	ENSG00000108924	HLF	protein_coding	1.22624	0.844842	0.422474	0.732592	0.528514	0.61939
ENST00000226091	ENSG00000108947	EFNB3	protein_coding	0	0	0	0	0	0
ENST00000226105	ENSG00000108961	RANGRF	protein_coding	3.3191	3.1671	1.96626	5.61446	2.86933	4.62487
ENST00000226193	ENSG00000109047	RCVRN	protein_coding	0	0.056435	0.052392	0.020421	0.069054	0
ENST00000226207	ENSG00000109061	MYH1	protein_coding	0	0	0	0	0	0
ENST00000226218	ENSG00000109072	VTN	protein_coding	0.468084	0.4089	0.362745	0.153695	0.310187	0.248669
ENST00000226225	ENSG00000109079	TNFAIP1	protein_coding	3.1802	3.29873	2.64626	5.47405	3.02173	4.07078
ENST00000226230	ENSG00000109084	TMEM97	protein_coding	0	1.69959	1.07662	0.446366	0.485151	0.565657
ENST00000226247	ENSG00000109101	FOXN1	protein_coding	0	0	0	0	0	0
ENST00000226253	ENSG00000109107	ALDOC	protein_coding	2.91499	7.11367	2.3169	2.1965	1.19626	1.71688
ENST00000226279	ENSG00000004468	CD38	protein_coding	2.47845	3.86054	2.85285	8.76181	2.53834	6.58302
ENST00000226284	ENSG00000029559	IBSP	protein_coding	0	0	0	0	0	0
ENST00000226299	ENSG00000002549	LAP3	protein_coding	1.60365	1.45512	0.092667	0.801177	0.973928	0.919516
ENST00000226317	ENSG00000124875	CXCL6	protein_coding	0	0	0	0	0	0
ENST00000226319	ENSG00000077684	JADE1	protein_coding	0.760745	0.848156	2.75442	6.12976	0.849562	1.06482
ENST00000226328	ENSG00000018189	RUFY3	protein_coding	2.709	2.60676	1.55323	1.83794	3.67678	2.80615
ENST00000226355	ENSG00000079557	AFM	protein_coding	0	0	0	0	0	0
ENST00000226359	ENSG00000081051	AFP	protein_coding	0	0	0	0	0	0
ENST00000226382	ENSG00000109132	PHOX2B	protein_coding	0	0	0	0	0	0
ENST00000226413	ENSG00000109163	GNRHR	protein_coding	0	0	0	0	0.137554	0.026183
ENST00000226432	ENSG00000109182	CWH43	protein_coding	0	0	0	0	0	0
ENST00000226444	ENSG00000109193	SULT1E1	protein_coding	0	0	0	0	0	0
ENST00000226460	ENSG00000109208	SMR3A	protein_coding	0	0	0	0	0	0
ENST00000226522	ENSG00000109270	LAMTOR3	protein_coding	0	0	0	0	0	0
ENST00000226524	ENSG00000109272	PF4V1	protein_coding	0	0.322284	0	0.330107	0.357946	0
ENST00000226574	ENSG00000109320	NFKB1	protein_coding	2.02519	5.06442	5.51994	3.68224	3.79972	8.1374
ENST00000226578	ENSG00000109323	MANBA	protein_coding	0	0.596173	0.73923	0.496118	0	0.272965
ENST00000226725	ENSG00000109466	KLHL2	protein_coding	5.11237	6.22926	5.1734	6.40727	7.52861	8.53317
ENST00000226730	ENSG00000109471	IL2	protein_coding	0.62123	0.158041	0	0.165024	0.064697	0.271641
ENST00000226760	ENSG00000109501	WFS1	protein_coding	0.254422	0.754524	0.415214	0	0	0.858804
ENST00000226796	ENSG00000109534	GAR1	protein_coding	3.2449	3.51729	3.08773	4.54311	5.14514	7.56792
ENST00000226798	ENSG00000109536	FRG1	protein_coding	3.71348	4.45627	5.12804	4.2002	4.96011	4.10876
ENST00000226951	ENSG00000109684	CLNK	protein_coding	0.032038	0.1004	0.120097	0.101575	0.197168	0.056897
ENST00000227065	ENSG00000109794	FAM149A	protein_coding	0	0	0	0	0	0
ENST00000227135	ENSG00000064199	SPA17	protein_coding	0	0	0	0	0	0
ENST00000227155	ENSG00000085117	CD82	protein_coding	12.1647	16.1045	8.98314	25.7823	12.1956	17.0405
ENST00000227157	ENSG00000134333	LDHA	protein_coding	0	0	0	0	0	0
ENST00000227163	ENSG00000066336	SPI1	protein_coding	5.14309	4.28165	3.18115	27.0587	13.3909	10.1728
ENST00000227214	ENSG00000021300	PLEKHB1	protein_coding	9.0935	1.90437	0.996113	2.0761	1.09572	0.76314
ENST00000227251	ENSG00000109846	CRYAB	protein_coding	0	0	0	0	0	0
ENST00000227266	ENSG00000109861	CTSC	protein_coding	20.4127	21.632	15.8676	33.3198	25.3212	33.0746
ENST00000227322	ENSG00000109917	ZPR1	protein_coding	12.9447	13.7366	13.6124	9.76584	14.3529	10.8571
ENST00000227348	ENSG00000109943	CRTAM	protein_coding	0.26318	0.484331	0.351441	0.777451	0.853206	0.429037
ENST00000227349	ENSG00000109944	JHY	protein_coding	0	0.945554	0	0.458716	0	0
ENST00000227378	ENSG00000109971	HSPA8	protein_coding	16.4759	11.5363	7.09224	6.57017	11.9748	14.241
ENST00000227451	ENSG00000110042	DTX4	protein_coding	0.127344	0.047091	0.225702	0.670142	0.549967	0.605727
ENST00000227471	ENSG00000110057	UNC93B1	protein_coding	9.15349	11.469	6.73285	33.9766	17.0589	19.4274
ENST00000227474	ENSG00000110060	PUS3	protein_coding	0	0	0.778569	0	0	0
ENST00000227495	ENSG00000110080	ST3GAL4	protein_coding	0.134815	0	0.008746	0.321659	0.292999	0.11666
ENST00000227503	ENSG00000168066	SF1	protein_coding	1.68635	1.52726	1.60999	0.728765	1.14423	1.18022
ENST00000227507	ENSG00000110092	CCND1	protein_coding	0.391435	0.184234	0.304709	0.585334	0.200682	0.870977
ENST00000227520	ENSG00000110104	CCDC86	protein_coding	4.0429	3.92701	3.41567	4.49086	5.05996	5.23326
ENST00000227524	ENSG00000110107	PRPF19	protein_coding	21.4253	23.5337	22.5385	31.5741	20.1536	31.6696
ENST00000227525	ENSG00000110108	TMEM109	protein_coding	15.7689	15.8767	12.931	29.2257	15.2071	19.1311
ENST00000227618	ENSG00000110200	ANAPC15	protein_coding	1.39179	0.253696	1.78388	1.41231	0.992117	0.425012
ENST00000227638	ENSG00000110218	PANX1	protein_coding	4.82505	4.47749	4.43897	6.622	3.4515	5.57124
ENST00000227665	ENSG00000110243	APOA5	protein_coding	0	0	0	0	0	0
ENST00000227667	ENSG00000110245	APOC3	protein_coding	0	0	0	0	0	0
ENST00000227752	ENSG00000110324	IL10RA	protein_coding	79.9655	86.3498	76.492	107.466	78.3964	92.9682
ENST00000227756	ENSG00000110328	GALNT18	protein_coding	0.114887	0	0.102455	0.009342	0.043394	0
ENST00000227758	ENSG00000110330	BIRC2	protein_coding	30.3048	24.682	25.8833	14.1517	29.3086	25.8932
ENST00000227868	ENSG00000110435	PDHX	protein_coding	6.44074	6.10893	4.40702	3.63468	5.12018	6.66736
ENST00000227880	ENSG00000110446	SLC15A3	protein_coding	3.319	4.35518	2.76169	16.7174	5.73179	5.6343
ENST00000227918	ENSG00000110484	SCGB2A2	protein_coding	0	0	0	0	0	0
ENST00000228027	ENSG00000062282	DGAT2	protein_coding	0	0.226159	0.187526	0.746742	0.173538	0.15794
ENST00000228136	ENSG00000110696	C11orf58	protein_coding	9.06317	8.7354	9.10807	24.9389	40.3827	35.3639
ENST00000228140	ENSG00000110700	RPS13	protein_coding	49.6422	12.1156	11.4492	5.1082	9.82252	7.90231
ENST00000228226	ENSG00000257017	HP	protein_coding	0	0	0	0	0	0
ENST00000228251	ENSG00000060138	YBX3	protein_coding	0.837522	1.65754	2.02996	3.82577	2.66691	1.36112
ENST00000228264	ENSG00000013573	DDX11	protein_coding	0	0	0	0	0	0
ENST00000228280	ENSG00000049130	KITLG	protein_coding	0	0	0	0	0	0
ENST00000228284	ENSG00000075856	SART3	protein_coding	14.2856	12.3292	13.5414	10.3907	12.4215	11.896
ENST00000228289	ENSG00000090612	ZNF268	protein_coding	0.769638	0	0	0	0	0
ENST00000228306	ENSG00000089157	RPLP0	protein_coding	0	0	0	0	0	0
ENST00000228307	ENSG00000089159	PXN	protein_coding	0.756374	0.59709	0.682101	0.387198	0.417074	0.281543
ENST00000228318	ENSG00000075415	SLC25A3	protein_coding	4.04376	5.153	6.02655	3.04036	5.69783	2.81747
ENST00000228347	ENSG00000013503	POLR3B	protein_coding	2.60988	2.48646	1.62197	2.35074	2.05753	3.57243
ENST00000228425	ENSG00000110841	PPFIBP1	protein_coding	0	0.268126	0.081401	0.221845	0	0.067355
ENST00000228434	ENSG00000110848	CD69	protein_coding	110.928	90.7247	75.8163	115.386	96.3838	100.925
ENST00000228437	ENSG00000110851	PRDM4	protein_coding	12.3896	12.8616	13.2094	8.02912	12.4173	11.0909
ENST00000228438	ENSG00000110852	CLEC2B	protein_coding	27.1333	25.0888	21.9595	16.7125	24.515	22.0896
ENST00000228463	ENSG00000110876	SELPLG	protein_coding	0.401214	0.270982	0.434805	1.43992	0.284709	1.31629
ENST00000228468	ENSG00000110881	ASIC1	protein_coding	0	0.384089	0.305805	0.142083	0	0.07322
ENST00000228476	ENSG00000110887	DAO	protein_coding	0	0	0	0	0	0
ENST00000228495	ENSG00000110906	KCTD10	protein_coding	5.86745	6.1027	3.55237	4.76524	3.8607	3.8281
ENST00000228506	ENSG00000110917	MLEC	protein_coding	8.53148	8.32392	6.3432	12.3573	9.26714	12.0677
ENST00000228510	ENSG00000110921	MVK	protein_coding	0	0	0	0	0	0.005995
ENST00000228515	ENSG00000110925	CSRNP2	protein_coding	4.56662	4.00254	3.94691	4.64328	3.58682	5.74233
ENST00000228534	ENSG00000110944	IL23A	protein_coding	3.93715	5.26544	4.35374	2.19535	3.60571	2.33335
ENST00000228567	ENSG00000110975	SYT10	protein_coding	0	0	0	0	0	0
ENST00000228606	ENSG00000111012	CYP27B1	protein_coding	0.215299	0.291337	0.034666	0.349808	0.38549	0.195466
ENST00000228641	ENSG00000111046	MYF6	protein_coding	0	0	0	0	0	0
ENST00000228644	ENSG00000111049	MYF5	protein_coding	0	0	0	0	0	0
ENST00000228682	ENSG00000111087	GLI1	protein_coding	0.392605	0.30643	0.278436	0.141187	0.334357	0.130328
ENST00000228705	ENSG00000111110	PPM1H	protein_coding	0.045883	0.046341	0.079553	0.240266	0.218486	0.04874
ENST00000228740	ENSG00000111144	LTA4H	protein_coding	22.0575	23.6989	18.7755	26.8515	22.2831	22.1652
ENST00000228741	ENSG00000111145	ELK3	protein_coding	13.1546	13.2209	12.4461	11.1178	10.3232	17.3928
ENST00000228799	ENSG00000111203	ITFG2	protein_coding	19.2626	19.9313	21.2852	15.642	19.4365	21.2914
ENST00000228811	ENSG00000111215	PRR4	protein_coding	0.636652	1.04123	0.387792	0.329305	1.14852	0.545807
ENST00000228820	ENSG00000111224	PARP11	protein_coding	2.56364	1.58788	2.81003	2.04793	2.2699	4.00934
ENST00000228825	ENSG00000111229	ARPC3	protein_coding	39.8999	44.5705	34.1218	59.6346	42.3753	52.3786
ENST00000228827	ENSG00000111231	GPN3	protein_coding	1.88405	0.26658	1.93421	2.9099	1.00293	3.01668
ENST00000228837	ENSG00000111241	FGF6	protein_coding	0	0	0	0	0	0
ENST00000228841	ENSG00000111245	MYL2	protein_coding	0	0	0	0	0	0
ENST00000228843	ENSG00000111247	RAD51AP1	protein_coding	0.133646	0.495154	0.526929	0.60268	0.655308	0.704605
ENST00000228850	ENSG00000111254	AKAP3	protein_coding	0.087591	0.062616	0.038417	0.190901	0.197821	0
ENST00000228862	ENSG00000111266	DUSP16	protein_coding	8.84327	3.36577	6.77133	1.98861	6.06785	2.8601
ENST00000228865	ENSG00000111269	CREBL2	protein_coding	11.0414	14.377	9.23994	13.6624	10.0555	18.1594
ENST00000228872	ENSG00000111276	CDKN1B	protein_coding	121.246	124.836	107.375	78.8668	106.672	77.3588
ENST00000228887	ENSG00000111291	GPRC5D	protein_coding	0	0.081037	0	0	0	0.048173
ENST00000228916	ENSG00000111319	SCNN1A	protein_coding	0	0	0	0	0	0
ENST00000228918	ENSG00000111321	LTBR	protein_coding	0.621603	1.06404	0.597603	4.23285	1.54247	1.07875
ENST00000228922	ENSG00000111325	OGFOD2	protein_coding	2.08808	0.971663	3.50861	3.79922	2.6635	2.12787
ENST00000228928	ENSG00000111331	OAS3	protein_coding	12.6517	13.8031	6.86692	22.6299	12.768	36.9803
ENST00000228936	ENSG00000111339	ART4	protein_coding	0	0	0	0	0.012884	0
ENST00000228938	ENSG00000111341	MGP	protein_coding	0.089284	0	0.068762	0.058996	0.032407	0.00762
ENST00000228945	ENSG00000111348	ARHGDIB	protein_coding	170.172	196.126	154.061	90.5945	235.121	88.9366
ENST00000228955	ENSG00000111358	GTF2H3	protein_coding	0.138712	1.621	0.674213	0	1.2852	0
ENST00000229002	ENSG00000111404	RERGL	protein_coding	0	0	0	0	0	0
ENST00000229003	ENSG00000111405	ENDOU	protein_coding	0	0	0	0	0	0
ENST00000229022	ENSG00000111424	VDR	protein_coding	0.750014	0.035357	0.008007	0.153392	0.016309	1.35985
ENST00000229030	ENSG00000111432	FZD10	protein_coding	0	0	0	0	0	0
ENST00000229134	ENSG00000111536	IL26	protein_coding	0	0.116752	0	0.052469	0.123857	0.133673
ENST00000229135	ENSG00000111537	IFNG	protein_coding	1.03788	0.830572	0.520705	4.42431	1.54499	2.07424
ENST00000229179	ENSG00000111581	NUP107	protein_coding	5.67387	4.65124	4.29788	4.19492	3.61458	6.34243
ENST00000229195	ENSG00000111596	CNOT2	protein_coding	3.94658	7.09741	4.95647	4.17719	5.23786	2.45157
ENST00000229201	ENSG00000111602	TIMELESS	protein_coding	0	0.124626	0	1.80352	0.024301	1.7919
ENST00000229214	ENSG00000111615	KRR1	protein_coding	18.0308	15.639	17.098	6.78969	16.039	11.4957
ENST00000229238	ENSG00000111639	MRPL51	protein_coding	0.971048	1.82693	0.840583	5.6436	1.46263	4.49495
ENST00000229239	ENSG00000111640	GAPDH	protein_coding	55.2627	100.136	92.007	212.189	118.873	119.636
ENST00000229243	ENSG00000111644	ACRBP	protein_coding	0.651831	0.84461	0.520078	0.738265	0.719824	0.369677
ENST00000229251	ENSG00000111652	COPS7A	protein_coding	4.61445	0	4.10276	6.89241	0.42114	0.566053
ENST00000229264	ENSG00000111664	GNB3	protein_coding	0.14388	0.12467	0.175186	0.026489	0.176241	0.289295
ENST00000229265	ENSG00000111665	CDCA3	protein_coding	0	0	0	0	0	0
ENST00000229266	ENSG00000111666	CHPT1	protein_coding	1.81106	1.47624	1.44198	2.55487	1.76369	1.49231
ENST00000229268	ENSG00000111667	USP5	protein_coding	0.807263	0.309303	1.90199	0.195781	0.379939	0.769934
ENST00000229270	ENSG00000111669	TPI1	protein_coding	0.406966	0.674936	0.506333	0.395193	0.270185	0.398819
ENST00000229277	ENSG00000111674	ENO2	protein_coding	6.21179	1.56479	7.20285	4.37624	1.85967	3.89356
ENST00000229281	ENSG00000111678	C12orf57	protein_coding	7.89747	6.9483	8.58461	17.1749	6.40115	6.42826
ENST00000229304	ENSG00000111701	APOBEC1	protein_coding	0	0	0	0	0	0
ENST00000229307	ENSG00000111704	NANOG	protein_coding	0	0.016229	0.016499	0	0.012802	0.016398
ENST00000229314	ENSG00000111711	GOLT1B	protein_coding	18.497	14.623	11.8812	8.27264	15.7473	12.4746
ENST00000229328	ENSG00000111725	PRKAB1	protein_coding	5.69104	7.87706	6.21338	8.47972	4.91642	4.79691
ENST00000229329	ENSG00000111726	CMAS	protein_coding	6.5915	6.94331	5.44711	5.12275	4.51277	7.487
ENST00000229330	ENSG00000111727	HCFC2	protein_coding	4.90376	4.15911	4.98744	3.36189	4.42374	4.46358
ENST00000229332	ENSG00000111729	CLEC4A	protein_coding	0.917582	2.38406	2.36927	5.21481	1.66118	3.14464
ENST00000229335	ENSG00000111732	AICDA	protein_coding	0	0	0	0	0	0
ENST00000229340	ENSG00000111737	RAB35	protein_coding	13.8119	15.9888	15.1887	20.3051	15.9656	17.9191
ENST00000229379	ENSG00000111775	COX6A1	protein_coding	40.8008	46.084	33.454	67.6073	41.6606	48.6423
ENST00000229384	ENSG00000257218	GATC	protein_coding	1.32283	0.537902	0.481629	1.24861	0.810254	0.695801
ENST00000229387	ENSG00000111783	RFX4	protein_coding	0	0	0	0	0	0
ENST00000229390	ENSG00000111786	SRSF9	protein_coding	36.8881	35.783	35.2505	39.2899	40.6983	42.1616
ENST00000229395	ENSG00000111790	FGFR1OP2	protein_coding	0.495976	1.30771	1.63711	3.57058	0.475121	0.515868
ENST00000229402	ENSG00000111796	KLRB1	protein_coding	37.2406	40.8934	38.7916	58.2896	20.3987	28.8094
ENST00000229416	ENSG00000001084	GCLC	protein_coding	2.31666	4.52014	2.27735	2.50544	1.18187	3.87984
ENST00000229447	ENSG00000009765	IYD	protein_coding	0	0	0	0	0	0
ENST00000229465.10	ENSG00000232774.7	FLJ22447	lincRNA	1.52005	1.46851	1.28383	0.487493	1.84629	0.813727
ENST00000229471	ENSG00000010810	FYN	protein_coding	5.41364	31.9661	14.1607	17.4424	21.5691	5.05828
ENST00000229554	ENSG00000111834	RSPH4A	protein_coding	0.653878	0.157817	0.192947	0.022435	0	0
ENST00000229563	ENSG00000111843	TMEM14C	protein_coding	8.36435	0.964625	4.56047	11.8401	5.89728	8.78716
ENST00000229570	ENSG00000111850	SMIM8	protein_coding	0	0	0	0	0.915271	2.79411
ENST00000229583	ENSG00000111863	ADTRP	protein_coding	0	0	0.03713	0	0	0.00108
ENST00000229595	ENSG00000111875	ASF1A	protein_coding	11.8646	12.1753	9.38088	9.41193	8.10872	11.0308
ENST00000229633	ENSG00000111911	HINT3	protein_coding	6.12979	6.11179	7.19128	5.68544	6.00488	5.42396
ENST00000229634	ENSG00000111912	NCOA7	protein_coding	3.8314	2.22482	3.1981	1.63611	3.7812	1.17033
ENST00000229708	ENSG00000111981	ULBP1	protein_coding	0	0	0	0	0	0
ENST00000229729	ENSG00000204385	SLC44A4	protein_coding	0	0	0	0	0	0
ENST00000229758	ENSG00000112029	FBXO5	protein_coding	0.349532	0.965352	0	0.957146	1.06228	1.45891
ENST00000229768	ENSG00000112038	OPRM1	protein_coding	0	0	0	0	0	0
ENST00000229769	ENSG00000112039	FANCE	protein_coding	1.43269	1.755	0.780939	3.2801	0.826557	3.46166
ENST00000229771	ENSG00000112041	TULP1	protein_coding	0	0	0	0	0	0
ENST00000229794	ENSG00000112062	MAPK14	protein_coding	13.1182	20.1515	15.0069	15.936	4.89857	22.8187
ENST00000229795	ENSG00000112062	MAPK14	protein_coding	1.04954	1.68052	0.710625	1.47667	4.08581	2.08344
ENST00000229810	ENSG00000112077	RHAG	protein_coding	0	0	0	0	0	0
ENST00000229812	ENSG00000112079	STK38	protein_coding	52.0039	55.5261	51.8275	64.3389	50.9639	84.5558
ENST00000229829	ENSG00000204252	HLA-DOA	protein_coding	2.15628	2.85426	1.1684	7.31895	3.61516	2.93919
ENST00000229854	ENSG00000112118	MCM3	protein_coding	6.57582	7.59405	0.012238	9.5649	0.132047	0.005666
ENST00000229903	ENSG00000112167	SAYSD1	protein_coding	1.89164	1.3358	0.822889	1.88399	2.8953	2.69401
ENST00000229913	ENSG00000164627	KIF6	protein_coding	0	0	0	0	0	0
ENST00000229922	ENSG00000112186	CAP2	protein_coding	0	0	0	0	0	0
ENST00000229955	ENSG00000112218	GPR63	protein_coding	0.188306	0.238178	0.113217	0.409214	0.183396	0.284279
ENST00000229971	ENSG00000112234	FBXL4	protein_coding	2.24884	1.87926	2.07243	1.05995	1.62901	1.21749
ENST00000230036	ENSG00000112293	GPLD1	protein_coding	0.18971	0.170898	0.161965	0.278498	0.424867	0.276721
ENST00000230048	ENSG00000112304	ACOT13	protein_coding	0.638118	0	0.559823	0.771573	0	1.35332
ENST00000230050	ENSG00000112306	RPS12	protein_coding	982.806	1074.89	981.577	1168.01	908.414	976.127
ENST00000230053	ENSG00000112309	B3GAT2	protein_coding	0.414192	0.227042	0.243469	0.29723	0.209863	0.185557
ENST00000230056	ENSG00000112312	GMNN	protein_coding	1.20192	0.393588	0.114637	1.76541	1.44874	1.64873
ENST00000230085	ENSG00000112335	SNX3	protein_coding	13.4326	12.4137	9.58292	12.8168	11.7524	18.3055
ENST00000230122	ENSG00000112365	ZBTB24	protein_coding	4.34384	4.49888	4.80645	4.27833	7.02761	4.50204
ENST00000230124	ENSG00000112367	FIG4	protein_coding	2.88754	2.62306	2.4706	4.20658	2.85598	4.7648
ENST00000230173	ENSG00000112414	ADGRG6	protein_coding	0.081958	0.153123	0.131925	0.403034	0.240422	0.123305
ENST00000230256	ENSG00000112494	UNC93A	protein_coding	0	0	0	0	0	0.016553
ENST00000230301	ENSG00000112539	C6orf118	protein_coding	0	0	0	0	0	0
ENST00000230321	ENSG00000112559	MDFI	protein_coding	0	0	0	0	0	0
ENST00000230323	ENSG00000112561	TFEB	protein_coding	0.491215	0.265176	0.476111	0.140408	0.266081	0.311117
ENST00000230340	ENSG00000112578	BYSL	protein_coding	1.3866	1.71471	1.48246	2.84282	1.17983	2.13385
ENST00000230354	ENSG00000112592	TBP	protein_coding	0.119977	0.079223	1.69188	3.96296	0.00118	5.1453
ENST00000230361	ENSG00000112599	GUCA1B	protein_coding	1.4574	1.66764	3.1808	1.94237	1.77392	1.75039
ENST00000230381	ENSG00000112619	PRPH2	protein_coding	0.024569	0.028265	0	0.019344	0	0.102015
ENST00000230413	ENSG00000112651	MRPL2	protein_coding	1.01876	0	1.56533	0	1.26059	0.428432
ENST00000230419	ENSG00000112655	PTK7	protein_coding	0.145018	0	0.18994	0.579754	0.935378	0
ENST00000230431	ENSG00000112667	DNPH1	protein_coding	0.006107	0.006779	1.54318	0.005227	1.27967	0.870247
ENST00000230449	ENSG00000112685	EXOC2	protein_coding	16.4554	16.5283	15.3646	12.0831	16.6407	17.3956
ENST00000230461	ENSG00000112697	TMEM30A	protein_coding	17.5011	15.593	15.0349	12.9198	14.2039	12.5208
ENST00000230480	ENSG00000112715	VEGFA	protein_coding	0	0.084725	0.095952	0.055215	0.079003	0.142317
ENST00000230510	ENSG00000112742	TTK	protein_coding	0	0	0	0.477844	0	0
ENST00000230529	ENSG00000112761	WISP3	protein_coding	0	0	0	0	0	0
ENST00000230538	ENSG00000112769	LAMA4	protein_coding	0	0	0	0	0	0
ENST00000230565	ENSG00000112796	ENPP5	protein_coding	0	0	0	0	0	0
ENST00000230568	ENSG00000112799	LY86	protein_coding	0.128136	0.049371	1.22172	0.219898	0.259734	0.083431
ENST00000230582	ENSG00000112812	PRSS16	protein_coding	0.096301	0.146806	0.091939	0.254428	0.072799	0.028928
ENST00000230588	ENSG00000112818	MEP1A	protein_coding	0	0	0	0	0	0
ENST00000230640	ENSG00000039123	MTREX	protein_coding	25.7887	23.8891	24.6095	15.0372	22.8707	22.4818
ENST00000230658	ENSG00000016082	ISL1	protein_coding	0	0	0	0	0	0
ENST00000230671	ENSG00000011083	SLC6A7	protein_coding	0	0	0	0	0.026552	0
ENST00000230732	ENSG00000091010	POU4F3	protein_coding	0	0	0	0	0	0
ENST00000230771	ENSG00000112855	HARS2	protein_coding	2.91386	2.26266	0.814201	1.87614	2.78871	3.27683
ENST00000230792	ENSG00000112874	NUDT12	protein_coding	0.441417	0.724703	0.505864	0.300989	0.272802	0.741316
ENST00000230859	ENSG00000112941	TENT4A	protein_coding	14.9628	16.2198	18.1986	14.3885	16.9848	16.082
ENST00000230882	ENSG00000112964	GHR	protein_coding	0	0	0	0	0	0
ENST00000230895	ENSG00000112977	DAP	protein_coding	11.0979	12.4049	10.8218	19.4781	11.8057	14.1567
ENST00000230901	ENSG00000112983	BRD8	protein_coding	3.93493	2.14914	0.285906	4.36183	0.390472	2.357
ENST00000230990	ENSG00000113070	HBEGF	protein_coding	0.573406	0.773826	0.80349	4.26261	0.938512	0.808805
ENST00000231004	ENSG00000113083	LOX	protein_coding	0.105094	0.032919	0.077995	0.021889	0	0.011105
ENST00000231009	ENSG00000113088	GZMK	protein_coding	15.4378	19.1847	14.994	24.773	7.03331	17.3002
ENST00000231021	ENSG00000113100	CDH9	protein_coding	0	0	0	0	0	0
ENST00000231061	ENSG00000113140	SPARC	protein_coding	2.56037	3.83382	0.645664	0.155232	0.936805	0.227443
ENST00000231121	ENSG00000113196	HAND1	protein_coding	0	0	0	0	0	0
ENST00000231130	ENSG00000113205	PCDHB3	protein_coding	0.072257	0	0.165	0	0.019843	0.016888
ENST00000231134	ENSG00000113209	PCDHB5	protein_coding	0.056735	0	0.21287	0.016892	0	0.016625
ENST00000231136	ENSG00000113211	PCDHB6	protein_coding	0	0	0	0	0	0
ENST00000231137	ENSG00000113212	PCDHB7	protein_coding	0	0	0.022713	0	0	0
ENST00000231173	ENSG00000113248	PCDHB15	protein_coding	0.004854	0.019684	0.232968	0.035827	0.034803	0.049452
ENST00000231188	ENSG00000113262	GRM6	protein_coding	0	0	0	0	0	0
ENST00000231198	ENSG00000113272	THG1L	protein_coding	1.7086	1.73457	1.91666	1.79598	1.45338	2.39128
ENST00000231228	ENSG00000113302	IL12B	protein_coding	0	0	0	0	0	0
ENST00000231229	ENSG00000113303	BTNL8	protein_coding	0	0	0.038365	0	0	0
ENST00000231238	ENSG00000113312	TTC1	protein_coding	9.49821	9.8418	3.56726	11.5455	8.48081	11.5018
ENST00000231338	ENSG00000082196	C1QTNF3	protein_coding	0	0	0	0	0	0
ENST00000231357	ENSG00000113430	IRX4	protein_coding	0	0	0	0	0	0
ENST00000231368	ENSG00000113441	LNPEP	protein_coding	45.0444	44.3448	40.9707	31.9539	39.4477	48.3937
ENST00000231420	ENSG00000113492	AGXT2	protein_coding	0	0	0	0	0	0
ENST00000231423	ENSG00000113494	PRLR	protein_coding	0	0	0	0	0	0
ENST00000231449	ENSG00000113520	IL4	protein_coding	0	0	0	0	0	0
ENST00000231454	ENSG00000113525	IL5	protein_coding	0	0	0	0	0	0.053719
ENST00000231461	ENSG00000113532	ST8SIA4	protein_coding	3.54421	3.82684	3.03174	4.76765	3.09382	5.26268
ENST00000231484	ENSG00000113555	PCDH12	protein_coding	0.378849	0.320716	0.155472	0.4707	0.161326	0.179448
ENST00000231498	ENSG00000113569	NUP155	protein_coding	8.64973	8.28351	9.01781	6.37162	9.34175	9.24051
ENST00000231509	ENSG00000113580	NR3C1	protein_coding	1.36752	3.40713	4.78045	2.39191	4.94996	13.5456
ENST00000231512	ENSG00000113583	C5orf15	protein_coding	6.90362	6.9664	6.70202	6.17901	7.69258	7.42327
ENST00000231524	ENSG00000113595	TRIM23	protein_coding	15.4664	13.1179	15.6668	5.54026	13.3835	8.28575
ENST00000231526	ENSG00000113597	TRAPPC13	protein_coding	3.68609	3.84815	0	3.41633	0	2.07089
ENST00000231572	ENSG00000113643	RARS	protein_coding	14.3511	12.6506	16.3582	8.45155	13.6236	14.3865
ENST00000231656	ENSG00000113722	CDX1	protein_coding	0	0	0	0	0	0
ENST00000231668	ENSG00000113734	BNIP1	protein_coding	0.130893	2.71972	0.205284	0.990985	1.68839	0.169317
ENST00000231683	ENSG00000113749	HRH2	protein_coding	0.136453	0.208813	0.149685	0.617692	0.094881	0.182777
ENST00000231706	ENSG00000013293	SLC7A14	protein_coding	0	0	0	0	0	0
ENST00000231721	ENSG00000010319	SEMA3G	protein_coding	0.803966	0.618387	0.841428	1.52924	1.52027	0.963465
ENST00000231749	ENSG00000004838	ZMYND10	protein_coding	0.141716	0.716263	0.625105	0.698788	0.388975	0.051403
ENST00000231751	ENSG00000012223	LTF	protein_coding	0.17792	0.253939	0.243812	0.153434	0.337297	0.202474
ENST00000231790	ENSG00000076242	MLH1	protein_coding	7.08403	4.73037	5.3017	4.97038	5.83619	5.14224
ENST00000231887	ENSG00000113790	EHHADH	protein_coding	0.049968	0.152866	0.187196	0.194082	0.227709	0.174687
ENST00000231948	ENSG00000113851	CRBN	protein_coding	3.06176	11.6175	1.26715	12.8069	2.16145	17.0664
ENST00000232003	ENSG00000113905	HRG	protein_coding	0	0	0	0	0	0
ENST00000232014	ENSG00000113916	BCL6	protein_coding	1.16812	0.201049	1.7109	2.34111	1.39908	1.3573
ENST00000232125	ENSG00000114023	FAM162A	protein_coding	0.528882	2.56254	0.422113	0.513038	0.5136	0.613793
ENST00000232165	ENSG00000114062	UBE3A	protein_coding	0	1.85388	1.53441	1.66856	1.1549	0.941143
ENST00000232217	ENSG00000114113	RBP2	protein_coding	0	0	0	0	0	0.111296
ENST00000232219	ENSG00000114115	RBP1	protein_coding	0	0	0	0	0	0
ENST00000232375	ENSG00000114268	PFKFB4	protein_coding	1.04376	1.04773	0.640628	5.52426	1.49068	2.00312
ENST00000232424	ENSG00000114315	HES1	protein_coding	0	0.083131	0	0.569685	0.042188	0.12938
ENST00000232458	ENSG00000114346	ECT2	protein_coding	0	0	0	0	0.057182	1.16002
ENST00000232461	ENSG00000114349	GNAT1	protein_coding	0	0	0.01978	0.019848	0	0
ENST00000232496	ENSG00000114383	TUSC2	protein_coding	6.97509	7.24712	4.52242	10.0955	5.92857	7.20117
ENST00000232501	ENSG00000114388	NPRL2	protein_coding	8.98094	9.00994	8.50281	8.98385	7.79425	10.2905
ENST00000232508	ENSG00000114395	CYB561D2	protein_coding	0.636089	1.0912	0.475098	0.964773	0.333171	0.839514
ENST00000232519	ENSG00000114405	C3orf14	protein_coding	0	0	0	0.258862	0	0
ENST00000232564	ENSG00000114450	GNB4	protein_coding	1.24132	1.42797	0.447783	4.63246	2.44722	2.31372
ENST00000232603	ENSG00000114487	MORC1	protein_coding	0	0	0	0	0	0
ENST00000232607	ENSG00000114491	UMPS	protein_coding	5.40553	5.30393	6.06976	3.35788	4.23772	4.4228
ENST00000232744	ENSG00000114626	ABTB1	protein_coding	15.8876	17.4109	19.8286	17.316	12.138	13.1493
ENST00000232766	ENSG00000114648	KLHL18	protein_coding	5.49174	5.55657	5.37317	6.73176	6.80502	7.28035
ENST00000232854	ENSG00000114735	HEMK1	protein_coding	1.1513	1.66809	1.62978	7.08584	1.8889	0.97962
ENST00000232888	ENSG00000114767	RRP9	protein_coding	2.03438	1.31191	1.65111	1.90036	1.40219	1.67168
ENST00000232892	ENSG00000114771	AADAC	protein_coding	0	0	0	0	0	0
ENST00000232905	ENSG00000114784	EIF1B	protein_coding	29.7141	30.6392	34.238	15.945	30.7809	22.4472
ENST00000232974	ENSG00000114853	ZBTB47	protein_coding	0.991103	0.618482	0.377874	1.39343	0.548834	0.731499
ENST00000232975	ENSG00000114854	TNNC1	protein_coding	0	0.128511	0.724917	0.593009	0	0.567213
ENST00000232978	ENSG00000114857	NKTR	protein_coding	24.6306	7.41278	11.779	3.20586	18.576	30.5884
ENST00000233025	ENSG00000114902	SPCS1	protein_coding	5.3e-05	4.9e-05	1.4e-05	0.017731	0.000237	1.8e-05
ENST00000233027	ENSG00000114904	NEK4	protein_coding	1.94339	2.48681	1.47446	3.12986	1.79556	4.46754
ENST00000233047	ENSG00000011638	TMEM159	protein_coding	4.91007	0.13564	1.77278	0.455802	0.856281	0.379556
ENST00000233055	ENSG00000085449	WDFY1	protein_coding	21.2743	15.709	18.1405	23.0927	23.3225	19.0256
ENST00000233057	ENSG00000055332	EIF2AK2	protein_coding	16.7789	15.0686	14.3956	9.84151	18.3548	22.4866
ENST00000233072	ENSG00000021826	CPS1	protein_coding	1.18979	0.600306	0.806901	0.035071	0.057052	0.105687
ENST00000233078	ENSG00000071626	DAZAP1	protein_coding	12.5435	1.13422	1.46106	0.592512	0.010145	0.009328
ENST00000233084	ENSG00000079785	DDX1	protein_coding	20.8604	15.2873	19.1082	0	18.5117	15.5835
ENST00000233099	ENSG00000008869	HEATR5B	protein_coding	23.1535	23.2085	20.5501	17.1907	19.3958	24.8769
ENST00000233114	ENSG00000014641	MDH1	protein_coding	22.3196	4.97664	20.6018	2.60576	21.1551	25.2784
ENST00000233121	ENSG00000084764	MAPRE3	protein_coding	0.886735	0.989313	0.552395	1.51838	0.981821	1.19088
ENST00000233143	ENSG00000034510	TMSB10	protein_coding	252.378	320.227	293.925	673.53	308.926	440.956
ENST00000233146	ENSG00000095002	MSH2	protein_coding	3.39701	3.20555	1.66431	4.51839	3.77787	1.28687
ENST00000233154	ENSG00000071051	NCK2	protein_coding	17.6841	19.3464	21.1051	29.007	15.607	19.7795
ENST00000233156	ENSG00000003436	TFPI	protein_coding	0.146882	0.278081	0.08671	0.012941	0.032742	0.08697
ENST00000233190	ENSG00000023228	NDUFS1	protein_coding	6.95595	5.90419	6.95378	5.57594	5.78871	6.87528
ENST00000233202	ENSG00000018280	SLC11A1	protein_coding	1.03402	1.31794	0.688451	11.7202	4.30844	2.75554
ENST00000233242	ENSG00000084674	APOB	protein_coding	0	0	0	0	0.004714	0
ENST00000233330	ENSG00000114993	RTKN	protein_coding	0	0	0	0	0	0
ENST00000233331	ENSG00000115274	INO80B	protein_coding	13.8551	11.9588	12.9623	11.0474	13.5472	2.68086
ENST00000233336	ENSG00000114999	TTL	protein_coding	1.47387	2.01146	1.32498	3.13401	1.65232	2.6743
ENST00000233379	ENSG00000115042	FAHD2A	protein_coding	3.62719	2.93879	2.98697	1.43036	1.5316	3.06959
ENST00000233468	ENSG00000115128	SF3B6	protein_coding	20.2334	22.0687	18.5237	13.1639	17.1052	15.4533
ENST00000233505	ENSG00000115163	CENPA	protein_coding	0	0	0	0.627604	0	0
ENST00000233535	ENSG00000115194	SLC30A3	protein_coding	0	0	0	0	0	0
ENST00000233545	ENSG00000115204	MPV17	protein_coding	6.199	5.12388	0	5.71498	0	0.168889
ENST00000233557	ENSG00000115216	NRBP1	protein_coding	12.9691	14.3335	13.7534	10.3171	8.85536	14.1027
ENST00000233573	ENSG00000115232	ITGA4	protein_coding	76.248	73.285	56.9858	132.261	77.4599	114.858
ENST00000233575	ENSG00000115234	SNX17	protein_coding	30.2905	35.8309	24.511	58.1592	33.6975	23.8448
ENST00000233596	ENSG00000115255	REEP6	protein_coding	0.937033	0.908054	0.47207	0.634356	0.983873	0.855361
ENST00000233607	ENSG00000115266	APC2	protein_coding	0	0	0	0	0	0.10912
ENST00000233609	ENSG00000115268	RPS15	protein_coding	0.013642	0.67787	0	0.63935	2.12335	0.000137
ENST00000233612	ENSG00000115271	GCA	protein_coding	1.03789	0.241865	0.484013	1.14003	0.512286	0.353423
ENST00000233615	ENSG00000239779	WBP1	protein_coding	17.1465	14.9855	7.42856	9.98503	7.02916	6.74223
ENST00000233616	ENSG00000115275	MOGS	protein_coding	0.888409	2.26646	1.0055	5.01472	2.23383	2.70121
ENST00000233623	ENSG00000115282	TTC31	protein_coding	4.62176	2.38444	5.4041	7.13027	4.73268	7.07726
ENST00000233627	ENSG00000115286	NDUFS7	protein_coding	4.59252	5.26035	4.95169	10.1716	4.4031	4.7994
ENST00000233630	ENSG00000115289	PCGF1	protein_coding	1.62101	1.63429	0.677655	2.06816	2.19736	2.58939
ENST00000233638	ENSG00000115297	TLX2	protein_coding	0.077966	0.062063	0	0.055812	0.14188	0.152508
ENST00000233668	ENSG00000115325	DOK1	protein_coding	2.31163	2.35526	1.49332	3.28918	1.42792	2.92391
ENST00000233710	ENSG00000115361	ACADL	protein_coding	0	0	0	0	0	0
ENST00000233712	ENSG00000115363	EVA1A	protein_coding	0	0	0	0	0	0
ENST00000233714	ENSG00000115365	LANCL1	protein_coding	0	0	0	0	0	0
ENST00000233735	ENSG00000115386	REG1A	protein_coding	0	0	0	0	0	0
ENST00000233741	ENSG00000115392	FANCL	protein_coding	0	0	0.11111	0.188262	3.36847	1.6665
ENST00000233809	ENSG00000115457	IGFBP2	protein_coding	0	0.197966	0	0.069075	0	0.059061
ENST00000233813	ENSG00000115461	IGFBP5	protein_coding	0	0.067491	0.054305	0	0.010712	0
ENST00000233826	ENSG00000115474	KCNJ13	protein_coding	0.634775	0.326665	0.606339	0.36757	0.276656	0.265498
ENST00000233838	ENSG00000115486	GGCX	protein_coding	2.0525	2.0725	1.39281	2.30838	1.90174	2.9198
ENST00000233840	ENSG00000115488	NEU2	protein_coding	0	0	0	0	0	0
ENST00000233892	ENSG00000115540	MOB4	protein_coding	0	0	0	0.001013	0	0
ENST00000233893	ENSG00000115541	HSPE1	protein_coding	5.42374	5.4871	6.43719	7.72469	7.30685	11.6729
ENST00000233948	ENSG00000115596	WNT6	protein_coding	0	0.049609	0	0.235418	0	0
ENST00000233954	ENSG00000115602	IL1RL1	protein_coding	0	0	0	0.439057	0	0
ENST00000233957	ENSG00000115604	IL18R1	protein_coding	0.297509	0.251284	0	0.109131	0	1.74288
ENST00000233969	ENSG00000115616	SLC9A2	protein_coding	0.01802	0	0	0	0	0
ENST00000233997	ENSG00000172232	AZU1	protein_coding	0	0	0	0.137781	0.128437	0
ENST00000234038	ENSG00000115685	PPP1R7	protein_coding	0.146116	2.62719	0.079119	2.09277	0.130465	0.202096
ENST00000234040	ENSG00000115687	PASK	protein_coding	11.1632	6.13907	2.77839	1.84639	6.30553	6.13068
ENST00000234071	ENSG00000115718	PROC	protein_coding	0	0.047443	0.048232	0.097405	0	0
ENST00000234091	ENSG00000115738	ID2	protein_coding	0.448904	1.28756	0.254859	14.9211	0.006383	2.06265
ENST00000234111	ENSG00000115758	ODC1	protein_coding	21.0636	20.8676	15.6705	21.2458	21.472	15.0765
ENST00000234115	ENSG00000115762	PLEKHB2	protein_coding	1.68466	0.000641	2.14772	1.72114	2.92632	5.7664
ENST00000234142	ENSG00000196208	GREB1	protein_coding	0.045671	0	0	0	0	0
ENST00000234160	ENSG00000115806	GORASP2	protein_coding	13.1573	15.6034	14.5108	11.2492	14.3834	13.7295
ENST00000234170	ENSG00000115816	CEBPZ	protein_coding	27.0093	23.9933	25.3812	10.6643	21.2795	18.4119
ENST00000234179	ENSG00000115825	PRKD3	protein_coding	10.9426	9.45916	11.363	5.44204	9.05832	8.88912
ENST00000234195	ENSG00000115841	RMDN2	protein_coding	0	0	0	0	0	0
ENST00000234198	ENSG00000115844	DLX2	protein_coding	0	0	0	0	0	0
ENST00000234256	ENSG00000115902	SLC1A4	protein_coding	2.03929	1.41111	1.98383	4.27972	3.9424	1.90005
ENST00000234296	ENSG00000115942	ORC2	protein_coding	9.55486	9.66181	10.3414	9.98194	9.13474	13.9
ENST00000234301	ENSG00000115944	COX7A2L	protein_coding	3.52306	2.30236	1.65652	8.72817	3.54737	1.32496
ENST00000234310	ENSG00000221823	PPP3R1	protein_coding	45.0844	41.6453	44.9287	35.4973	43.2798	35.7292
ENST00000234313	ENSG00000115956	PLEK	protein_coding	14.9711	13.4107	5.0945	35.5691	16.6958	22.0887
ENST00000234347	ENSG00000196415	PRTN3	protein_coding	0	0	0	0	0	0
ENST00000234371	ENSG00000116014	KISS1R	protein_coding	0.477567	0.153117	0.609286	0.168098	0.25127	0.318846
ENST00000234389	ENSG00000116032	GRIN3B	protein_coding	0.425854	0.33336	0.854041	0.466107	0.256576	0.349
ENST00000234392	ENSG00000116035	VAX2	protein_coding	0	0	0	0	0	0
ENST00000234396	ENSG00000116039	ATP6V1B1	protein_coding	0.062555	0	0	0.061969	0	0
ENST00000234420	ENSG00000116062	MSH6	protein_coding	0.710903	0.018761	2.93898	1.35468	0.32624	4.51395
ENST00000234453	ENSG00000116095	PLEKHA3	protein_coding	7.3768	7.05891	6.46916	5.06362	7.50331	5.25869
ENST00000234454	ENSG00000116096	SPR	protein_coding	0	0.11367	0	0	0	0
ENST00000234549	ENSG00000009780	FAM76A	protein_coding	0	0	0	0	0	0
ENST00000234590	ENSG00000074800	ENO1	protein_coding	104.082	110.964	76.2035	185.025	93.6376	140.472
ENST00000234626	ENSG00000097046	CDC7	protein_coding	0	3.70274	0	3.10557	0	4.05748
ENST00000234677	ENSG00000031698	SARS	protein_coding	15.5293	20.76	16.7117	23.03	19.2518	26.8301
ENST00000234701	ENSG00000016490	CLCA1	protein_coding	0	0	0	0	0	0
ENST00000234739	ENSG00000116128	BCL9	protein_coding	2.01029	3.25392	2.83269	2.54972	2.06449	4.41965
ENST00000234798	ENSG00000116176	TPSG1	protein_coding	0.058658	0	0	0	0	0
ENST00000234816	ENSG00000116194	ANGPTL1	protein_coding	0	0.027315	0.036015	0.009144	0.00933	0
ENST00000234827	ENSG00000116205	TCEANC2	protein_coding	1.67091	2.05192	1.51069	2.47397	1.69564	3.80724
ENST00000234831	ENSG00000116209	TMEM59	protein_coding	6.54769	6.3752	5.88751	4.24925	6.40984	5.23614
ENST00000234875	ENSG00000116251	RPL22	protein_coding	75.0956	83.8617	76.264	80.5643	70.7781	68.2507
ENST00000234961	ENSG00000116329	OPRD1	protein_coding	0	0	0	0.01154	0	0.004795
ENST00000235090	ENSG00000116455	WDR77	protein_coding	12.5482	11.4142	11.5417	15.8958	11.085	14.3389
ENST00000235150	ENSG00000116514	RNF19B	protein_coding	10.3234	9.53752	8.4039	18.8579	10.0145	12.0514
ENST00000235180	ENSG00000116544	DLGAP3	protein_coding	0	0	0	0.032897	0	0
ENST00000235307	ENSG00000116667	C1orf21	protein_coding	2.90691	1.84069	1.04905	0.785295	2.89794	1.05532
ENST00000235310	ENSG00000116670	MAD2L2	protein_coding	0	0.684469	0.114467	3.48657	0.073492	4.1234
ENST00000235329	ENSG00000116688	MFN2	protein_coding	13.3555	13.5366	1.42369	16.34	13.8286	16.002
ENST00000235332	ENSG00000116691	MIIP	protein_coding	11.836	12.4253	8.75732	23.3211	12.643	15.0592
ENST00000235345	ENSG00000116704	SLC35D1	protein_coding	10.1685	10.0435	11.4917	6.38206	9.61779	8.79084
ENST00000235347	ENSG00000187545	PRAMEF10	protein_coding	0	0	0	0	0	0
ENST00000235349	ENSG00000243073	PRAMEF4	protein_coding	0	0	0	0	0	0
ENST00000235372	ENSG00000116731	PRDM2	protein_coding	10.6697	3.58656	2.8914	7.74589	3.32417	15.878
ENST00000235382	ENSG00000116741	RGS2	protein_coding	12.417	13.1198	11.6647	25.9885	13.3887	16.2713
ENST00000235453	ENSG00000213047	DENND1B	protein_coding	3.93951	3.66449	2.33083	3.02919	3.09077	3.37926
ENST00000235521	ENSG00000116874	WARS2	protein_coding	2.35294	2.16914	1.2203	2.27801	2.43456	2.50671
ENST00000235532	ENSG00000116885	OSCP1	protein_coding	0	0	0	0	0.192033	0
ENST00000235628	ENSG00000116981	NT5C1A	protein_coding	1.29765	0.827081	1.21405	0.480532	0.871743	0.40743
ENST00000235739	ENSG00000117090	SLAMF1	protein_coding	0	0	0	0	0	0
ENST00000235790	ENSG00000117139	KDM5B	protein_coding	0.189047	0.186498	0.186139	0.208074	0.078487	0.106247
ENST00000235835	ENSG00000053371	AKR7A2	protein_coding	13.1831	12.0425	6.62833	16.5925	6.29091	11.8545
ENST00000235932	ENSG00000117280	RAB29	protein_coding	0.213086	1e-06	0	0.631153	0	0.344259
ENST00000235933	ENSG00000117281	CD160	protein_coding	0	0.152141	0	0.115812	0.086682	0.512599
ENST00000235958	ENSG00000117305	HMGCL	protein_coding	0	0	0	0	0	0
ENST00000236017	ENSG00000117362	APH1A	protein_coding	0	0	1.1549	1.40714	0.563591	1.36279
ENST00000236040	ENSG00000117385	P3H1	protein_coding	2.46538	2.38007	3.11644	4.40177	1.95751	3.27075
ENST00000236051	ENSG00000117395	EBNA1BP2	protein_coding	4.76866	3.73023	0	11.7868	4.54508	7.07702
ENST00000236067	ENSG00000117410	ATP6V0B	protein_coding	5.39398	5.26653	3.66662	11.8543	5.17616	8.18753
ENST00000236137	ENSG00000117479	SLC19A2	protein_coding	0.501762	1.48129	1.50228	0.524402	1.11106	1.40133
ENST00000236147	ENSG00000188404	SELL	protein_coding	122.292	178.089	100.404	121.73	99.5213	202.306
ENST00000236192	ENSG00000117533	VAMP4	protein_coding	8.49633	7.47562	8.4179	6.86767	6.74968	9.5192
ENST00000236255	ENSG00000158055	GRHL3	protein_coding	0	0	0	0.011735	0	0
ENST00000236273	ENSG00000117614	SYF2	protein_coding	17.6164	17.7613	20.1149	11.5575	18.6527	15.015
ENST00000236342	ENSG00000117682	DHDDS	protein_coding	3.50621	1.06454	2.00297	3.23997	1.32986	2.2427
ENST00000236412	ENSG00000117751	PPP1R8	protein_coding	0.622972	3.06115	2.0089	0.722243	0.852096	0.909962
ENST00000236495	ENSG00000117834	SLC5A9	protein_coding	0	0.035391	0	0.029323	0.082842	0
ENST00000236671	ENSG00000117984	CTSD	protein_coding	29.4116	38.5431	29.2007	43.9544	25.4783	8.9357
ENST00000236693	ENSG00000118004	COLEC11	protein_coding	0	0	0	0	0	0
ENST00000236698	ENSG00000118007	STAG1	protein_coding	0.09761	0	0	0	0	0
ENST00000236709	ENSG00000118017	A4GNT	protein_coding	0	0	0	0	0	0
ENST00000236826	ENSG00000118113	MMP8	protein_coding	0	0	0	0	0	0.01854
ENST00000236850	ENSG00000118137	APOA1	protein_coding	0.079453	0.205663	0.45996	0.036818	0.175912	0.001739
ENST00000236877	ENSG00000118160	SLC8A2	protein_coding	0.03688	0.016071	0.065028	0.010865	0.025142	0
ENST00000236914	ENSG00000116833	NR5A2	protein_coding	0	0	0	0	0	0
ENST00000236918	ENSG00000118194	TNNT2	protein_coding	0	0	0	0	0	0
ENST00000236925	ENSG00000118200	CAMSAP2	protein_coding	0	0	0.001115	0	0	0
ENST00000236937	ENSG00000072694	FCGR2B	protein_coding	0.093852	4.00483	0	3.93294	1.96411	1.67967
ENST00000236938	ENSG00000132185	FCRLA	protein_coding	0	0	0	0	0.511027	0
ENST00000236957	ENSG00000114942	EEF1B2	protein_coding	0	7.99902	0.996288	34.3117	10.2633	0.577828
ENST00000236959	ENSG00000138363	ATIC	protein_coding	2.59861	2.15331	1.44768	7.13446	2.32374	3.42445
ENST00000236979	ENSG00000118245	TNP1	protein_coding	0	0	0	0	0	0
ENST00000236980	ENSG00000118246	FASTKD2	protein_coding	5.44173	4.05357	5.05598	2.86668	4.36365	4.23634
ENST00000237014	ENSG00000118271	TTR	protein_coding	0	0	0	0	0	0
ENST00000237019	ENSG00000118276	B4GALT6	protein_coding	0	0	0	0	0	0
ENST00000237163	ENSG00000083097	DOPEY1	protein_coding	1.15323	0	0	0	3.94587	0
ENST00000237172	ENSG00000118407	FILIP1	protein_coding	0	0	0	0	0	0
ENST00000237201	ENSG00000118434	SPACA1	protein_coding	0	0	0	0	0	0
ENST00000237247	ENSG00000118473	SGIP1	protein_coding	0	0	0	0	0	0
ENST00000237264	ENSG00000028839	TBPL1	protein_coding	5.10584	4.52884	3.39016	2.8203	4.12075	4.18634
ENST00000237275	ENSG00000118491	ZC2HC1B	protein_coding	0	0	0	0.111073	0.110582	0.16627
ENST00000237281	ENSG00000118496	FBXO30	protein_coding	2.44186	1.92272	1.86508	2.51583	2.17939	3.14335
ENST00000237283	ENSG00000189007	ADAT2	protein_coding	0	0	0	0	0.956148	0
ENST00000237289	ENSG00000118503	TNFAIP3	protein_coding	2.55654	2.27645	2.42204	1.50064	3.56228	1.23704
ENST00000237305	ENSG00000118515	SGK1	protein_coding	2.11097	0.900946	2.02444	1.45992	0.69045	1.19197
ENST00000237316	ENSG00000118526	TCF21	protein_coding	0	0	0	0	0	0
ENST00000237353	ENSG00000118557	PMFBP1	protein_coding	0.038483	0	0.045748	0	0.017944	0
ENST00000237380	ENSG00000118579	MED28	protein_coding	20.9338	21.3915	24.3506	14.7473	20.4471	18.0946
ENST00000237449	ENSG00000115423	DNAH6	protein_coding	0	0	0	0	0	0
ENST00000237455	ENSG00000239305	RNF103	protein_coding	22.344	20.5247	27.9552	12.9477	22.1017	11.9639
ENST00000237500	ENSG00000118680	MYL12B	protein_coding	101.4	91.8054	81.3465	104.734	81.2908	94.3731
ENST00000237512	ENSG00000118690	ARMC2	protein_coding	0.630132	0	0	1.88103	0	0.038857
ENST00000237527	ENSG00000118702	GHRH	protein_coding	0	0	0	0	0	0
ENST00000237530	ENSG00000118705	RPN2	protein_coding	40.875	36.0333	28.2801	37.3682	38.1016	37.1996
ENST00000237536	ENSG00000149639	SOGA1	protein_coding	0.519159	0.633199	0.41557	2.41486	1.3135	1.48145
ENST00000237596	ENSG00000118762	PKD2	protein_coding	2.7827	3.2385	3.66467	3.84592	4.08787	3.4443
ENST00000237612	ENSG00000118777	ABCG2	protein_coding	0.144985	0.086918	0.201494	0.086843	0.188863	0
ENST00000237623	ENSG00000118785	SPP1	protein_coding	0.120654	0	0	0	0	0
ENST00000237642	ENSG00000118804	STBD1	protein_coding	0.081811	0.095712	0.087517	0.226563	0.038023	0.198583
ENST00000237653	ENSG00000172955	ADH6	protein_coding	0	0	0	0	0	0
ENST00000237654	ENSG00000118816	CCNI	protein_coding	160.661	174.06	158.814	165.892	172.205	140.393
ENST00000237696	ENSG00000118849	RARRES1	protein_coding	0	0.111283	0.073407	0.19726	0.082772	0
ENST00000237822	ENSG00000118961	LDAH	protein_coding	3.74573	4.3474	3.37948	4.17316	2.79379	4.70995
ENST00000237837	ENSG00000118972	FGF23	protein_coding	0	0	0	0	0	0
ENST00000237853	ENSG00000118985	ELL2	protein_coding	5.72575	5.43377	8.03476	1.44064	7.8221	1.80772
ENST00000237858	ENSG00000173221	GLRX	protein_coding	12.0055	13.7121	10.2184	17.9752	7.51417	17.4868
ENST00000237889	ENSG00000119013	NDUFB3	protein_coding	6.22107	8.71057	4.46559	10.9258	4.70848	11.1131
ENST00000237937	ENSG00000107372	ZFAND5	protein_coding	5.93209	4.04002	6.20558	2.3943	2.71866	2.71499
ENST00000238018	ENSG00000119125	GDA	protein_coding	0	0	0	0	0	0
ENST00000238044	ENSG00000119147	C2orf40	protein_coding	0.783887	0	0.50697	0.364808	0.704952	0.428235
ENST00000238081	ENSG00000134308	YWHAQ	protein_coding	56.1341	47.6555	34.1596	62.673	54.1207	47.5898
ENST00000238091	ENSG00000119185	ITGB1BP1	protein_coding	0.94101	0.403564	0	0.309662	0.427766	1.08247
ENST00000238112	ENSG00000119203	CPSF3	protein_coding	5.25476	2.29448	2.07688	6.25015	5.60875	5.44857
ENST00000238146	ENSG00000111364	DDX55	protein_coding	7.25239	5.72717	8.12496	6.00082	6.69462	7.65673
ENST00000238156	ENSG00000119242	CCDC92	protein_coding	2.54239	1.4056	2.8504	2.76493	1.88958	2.73043
ENST00000238181	ENSG00000116977	LGALS8	protein_coding	0	0.916254	0	0.51352	0	0
ENST00000238256	ENSG00000119321	FKBP15	protein_coding	0.802598	0.607827	1.77596	0.497471	1.39379	0.491861
ENST00000238341	ENSG00000119397	CNTRL	protein_coding	0	0	1.75174	0	11.598	16.5751
ENST00000238379	ENSG00000119431	HDHD3	protein_coding	5.25341	4.23161	3.21581	4.8314	2.06712	3.54151
ENST00000238483	ENSG00000115266	APC2	protein_coding	0	0	0	0	0	0
ENST00000238497	ENSG00000119541	VPS4B	protein_coding	16.8464	17.097	16.3976	16.0947	19.1693	19.5655
ENST00000238508	ENSG00000242550	SERPINB10	protein_coding	0	0	0	0	0	0.053402
ENST00000238558	ENSG00000133937	GSC	protein_coding	0.077128	0	0	0	0	0
ENST00000238561	ENSG00000063761	ADCK1	protein_coding	2.77845	2.39685	1.60365	3.72877	2.65646	3.03133
ENST00000238607	ENSG00000119630	PGF	protein_coding	0	0	0	0	0	0
ENST00000238609	ENSG00000119632	IFI27L2	protein_coding	4.78161	5.63957	1.82215	8.42846	2.1685	5.55244
ENST00000238616	ENSG00000119638	NEK9	protein_coding	13.6358	14.9627	14.5461	13.8011	14.0924	16.7746
ENST00000238618	ENSG00000119640	ACYP1	protein_coding	2.38707	2.26627	2.22188	4.08199	0	1.36454
ENST00000238628	ENSG00000119650	IFT43	protein_coding	0.243521	0.044897	0.277974	0.057776	0.121949	0.033753
ENST00000238633	ENSG00000119655	NPC2	protein_coding	0	0	0	0	0	0
ENST00000238647	ENSG00000119669	IRF2BPL	protein_coding	13.4772	15.0391	13.9936	29.0531	10.7232	14.6529
ENST00000238651	ENSG00000119673	ACOT2	protein_coding	0.171438	2.54833	0.749232	2.15202	1.21286	0.92635
ENST00000238667	ENSG00000119686	FLVCR2	protein_coding	0.614385	0.666033	0.397314	1.89886	1.05493	1.02837
ENST00000238682	ENSG00000119699	TGFB3	protein_coding	1.68376	1.27577	1.53899	0.832128	1.78031	1.2194
ENST00000238686	ENSG00000119703	ZC2HC1C	protein_coding	0	0	0	0	0	0
ENST00000238688	ENSG00000119705	SLIRP	protein_coding	0	0	0	0	0	0
ENST00000238714	ENSG00000115421	PAPOLG	protein_coding	9.43495	8.5844	7.81748	5.06842	8.64776	8.60976
ENST00000238721	ENSG00000115129	TP53I3	protein_coding	0	0.114975	0	0.944792	0.012401	0
ENST00000238738	ENSG00000119729	RHOQ	protein_coding	5.17862	5.48054	4.46983	6.04532	6.1243	4.87082
ENST00000238788	ENSG00000119777	TMEM214	protein_coding	5.7551	6.64993	5.52956	13.4942	6.62347	10.3311
ENST00000238789	ENSG00000119778	ATAD2B	protein_coding	11.3055	12.8783	16.5358	7.63762	13.4637	13.9166
ENST00000238823	ENSG00000119812	FAM98A	protein_coding	2.32864	2.99697	1.12933	3.44282	2.50739	3.34929
ENST00000238831	ENSG00000119820	YIPF4	protein_coding	12.2241	12.0404	12.7255	10.376	12.1547	11.4069
ENST00000238855	ENSG00000119844	AFTPH	protein_coding	0.093862	0.057524	1.48596	1.18085	0.048423	2.47519
ENST00000238856	ENSG00000119844	AFTPH	protein_coding	14.0049	12.3062	1.73692	1.05457	12.9861	1.05694
ENST00000238875	ENSG00000119862	LGALSL	protein_coding	0.58015	1.11995	0.107155	0.113214	0.374183	0.062699
ENST00000238892	ENSG00000119878	CRIPT	protein_coding	17.3033	17.1146	19.1932	9.39194	14.5377	14.8341
ENST00000238918	ENSG00000135298	ADGRB3	protein_coding	0	0	0	0	0	0
ENST00000238936	ENSG00000138111	MFSD13A	protein_coding	2.20719	1.54221	1.20214	3.41308	1.53881	3.09129
ENST00000238961	ENSG00000119906	SLF2	protein_coding	7.2051	7.41788	7.35876	6.30916	6.34083	11.3418
ENST00000238983	ENSG00000182333	LIPF	protein_coding	0	0	0	0	0	0
ENST00000238994	ENSG00000119938	PPP1R3C	protein_coding	0	0	0.023876	0	0	0
ENST00000239007	ENSG00000119950	MXI1	protein_coding	22.0295	21.5669	11.916	11.3483	16.6728	17.9517
ENST00000239026	ENSG00000119969	HELLS	protein_coding	0	0	0.009717	0.007266	0.002025	0.003607
ENST00000239032	ENSG00000119973	PRLHR	protein_coding	0	0	0	0	0	0
ENST00000239117	ENSG00000120049	KCNIP2	protein_coding	0	1.45705	0	0.569399	0	0
ENST00000239144	ENSG00000120068	HOXB8	protein_coding	0	0	0	0	0	0
ENST00000239151	ENSG00000120075	HOXB5	protein_coding	0	0	0.083798	0	0	0
ENST00000239165	ENSG00000260027	HOXB7	protein_coding	0	0.184062	0.062375	0.140802	0.387643	0.165308
ENST00000239174	ENSG00000120094	HOXB1	protein_coding	0	0	0	0	0	0
ENST00000239223	ENSG00000120129	DUSP1	protein_coding	177.151	119.862	71.6329	439.28	187.956	76.4866
ENST00000239231	ENSG00000120137	PANK3	protein_coding	22.0872	19.2861	19.9852	13.0345	19.8497	15.6682
ENST00000239243	ENSG00000120149	MSX2	protein_coding	0	0	0	0.025688	0	0
ENST00000239316	ENSG00000120211	INSL4	protein_coding	0	0.043092	0.079494	0.029491	0	0
ENST00000239347	ENSG00000214042	IFNA7	protein_coding	0	0	0	0	0	0
ENST00000239367	ENSG00000120256	LRP11	protein_coding	0.800287	0.564215	0.522179	0.861516	0.629209	0.531395
ENST00000239374	ENSG00000120262	CCDC170	protein_coding	0.049484	0	0.063764	0.263706	0.208754	0.081332
ENST00000239440	ENSG00000120318	ARAP3	protein_coding	0.772884	0.761686	0	0.171626	0.607212	0.17443
ENST00000239444	ENSG00000120322	PCDHB8	protein_coding	0.01779	0.007675	0	0	0	0
ENST00000239446	ENSG00000120324	PCDHB10	protein_coding	0.029632	0	0.075061	0	0.021719	0.001722
ENST00000239449	ENSG00000120327	PCDHB14	protein_coding	0.020193	0.026134	0.038161	0	0.020683	0.029307
ENST00000239450	ENSG00000120328	PCDHB12	protein_coding	0	0	0	0	0.004319	0.002451
ENST00000239451	ENSG00000120329	SLC25A2	protein_coding	1.37232	0.830872	1.49024	0.345319	1.09138	0.7244
ENST00000239461	ENSG00000116132	PRRX1	protein_coding	0	0	0	0	0	0
ENST00000239462	ENSG00000120332	TNN	protein_coding	0	0	0	0	0.018252	0.004682
ENST00000239587	ENSG00000120440	TTLL2	protein_coding	0	0.040538	0	0	0	0
ENST00000239614	ENSG00000120458	MSANTD2	protein_coding	0.226265	0.00483	1.03182	0.735948	0.187589	0.345867
ENST00000239666	ENSG00000120509	PDZD11	protein_coding	1.97775	1.8595	2.33591	6.74158	3.10043	5.8487
ENST00000239690	ENSG00000120526	NUDCD1	protein_coding	1.69517	1.88585	1.31759	2.44009	1.6985	4.59814
ENST00000239830	ENSG00000120647	CCDC77	protein_coding	0.96674	1.36603	0	0.486515	0.380203	1.28552
ENST00000239849	ENSG00000120659	TNFSF11	protein_coding	0	0	0	0	0	0
ENST00000239859	ENSG00000242715	CCDC169	protein_coding	0	0	0	0	0	0
ENST00000239860	ENSG00000242715	CCDC169	protein_coding	0	0	0	0	0	0
ENST00000239878	ENSG00000120686	UFM1	protein_coding	20.3893	18.9112	17.9285	13.242	19.5078	18.3974
ENST00000239882	ENSG00000120690	ELF1	protein_coding	86.1654	66.219	81.1486	35.2205	91.6504	51.292
ENST00000239891	ENSG00000120697	ALG5	protein_coding	10.3821	8.88758	9.04202	7.63564	10.8922	8.50713
ENST00000239906	ENSG00000120709	FAM53C	protein_coding	12.2415	14.4217	11.9831	13.4703	13.2199	13.5302
ENST00000239926	ENSG00000120729	MYOT	protein_coding	0.214136	0.060558	0.191195	0.02108	0.147663	0.067884
ENST00000239938	ENSG00000120738	EGR1	protein_coding	0.630251	0.681311	0.381161	9.25621	0.686166	2.56778
ENST00000239940	ENSG00000070087	PFN2	protein_coding	1.58757	1.20072	1.86592	0.586958	1.00622	0.768652
ENST00000239944	ENSG00000120742	SERP1	protein_coding	0.74383	0.853882	0.74882	0.303441	15.0759	22.7174
ENST00000240050	ENSG00000120832	MTERF2	protein_coding	4.09735	0.180155	0.361527	0	0.134342	0.008481
ENST00000240055	ENSG00000120837	NFYB	protein_coding	2.28468	2.51975	2.02095	1.40751	2.28353	2.46412
ENST00000240079	ENSG00000120860	WASHC3	protein_coding	6.18804	7.9922	6.32593	4.70623	4.93631	11.7334
ENST00000240093	ENSG00000104290	FZD3	protein_coding	1.54599	1.12969	0.394577	0.402013	0.021456	0.09388
ENST00000240095	ENSG00000104635	SLC39A14	protein_coding	0	0	0	0	0	0
ENST00000240100	ENSG00000120875	DUSP4	protein_coding	4.41098	3.79766	6.28956	6.51143	4.5171	3.7916
ENST00000240101	ENSG00000120875	DUSP4	protein_coding	1.22201	0.532965	1.33958	2.58166	1.13165	1.6302
ENST00000240123	ENSG00000120896	SORBS3	protein_coding	7.29469	6.15995	4.29511	8.27376	7.16704	6.64902
ENST00000240132	ENSG00000120903	CHRNA2	protein_coding	0	0	0	0	0	0
ENST00000240139	ENSG00000120910	PPP3CC	protein_coding	35.1506	19.1087	10.0678	10.8774	37.1877	16.3502
ENST00000240185	ENSG00000120948	TARDBP	protein_coding	31.6287	25.7106	29.6648	11.8159	28.9639	5.28634
ENST00000240189	ENSG00000120952	PRAMEF2	protein_coding	0	0	0	0	0	0
ENST00000240285	ENSG00000121039	RDH10	protein_coding	1.50663	1.7485	1.02815	2.99715	2.02255	2.54486
ENST00000240304	ENSG00000108848	LUC7L3	protein_coding	0	0	2.74017	0.666462	0.583035	0.721011
ENST00000240306	ENSG00000108813	DLX4	protein_coding	0	0.041626	0	0.055217	0	0
ENST00000240316	ENSG00000121058	COIL	protein_coding	8.371	7.76961	6.3201	4.75874	7.43348	8.1662
ENST00000240328	ENSG00000121068	TBX2	protein_coding	0	0	0	0	0	0
ENST00000240333	ENSG00000121073	SLC35B1	protein_coding	9.56999	7.98961	9.0562	8.40548	8.20242	7.20072
ENST00000240335	ENSG00000121075	TBX4	protein_coding	0	0	0	0	0	0
ENST00000240361	ENSG00000121101	TEX14	protein_coding	0	0	0	0	0	0.009702
ENST00000240364	ENSG00000121104	FAM117A	protein_coding	19.9218	22.5298	18.871	30.6844	17.5907	31.389
ENST00000240423	ENSG00000121152	NCAPH	protein_coding	1.41579	0	0	0	2.18452	0
ENST00000240487	ENSG00000121210	TMEM131L	protein_coding	1.75896	0.871389	0.813146	1.09099	0.922905	0.458435
ENST00000240488	ENSG00000121211	MND1	protein_coding	0.028079	0.137453	0	0.118543	0.06694	0.057557
ENST00000240499	ENSG00000131127	ZNF141	protein_coding	10.6352	9.5733	10.7702	4.68363	8.74094	11.4745
ENST00000240587	ENSG00000121297	TSHZ3	protein_coding	0.432259	0.258611	0.165106	0.440313	0.627786	0.587426
ENST00000240615	ENSG00000121314	TAS2R8	protein_coding	0.030065	0.129705	0	0	0.107116	0.068374
ENST00000240617	ENSG00000121316	PLBD1	protein_coding	0.655701	1.35709	0.390179	3.49853	1.18455	1.0125
ENST00000240618	ENSG00000213809	KLRK1	protein_coding	1.52205	1.70612	0.261192	4.71283	6.89732	1.76109
ENST00000240619	ENSG00000121318	TAS2R10	protein_coding	1.00951	0.464711	0.474633	0.423371	0.542422	0.358877
ENST00000240651	ENSG00000121350	PYROXD1	protein_coding	10.3361	9.21759	10.1067	5.91414	10.1448	8.09347
ENST00000240652	ENSG00000121351	IAPP	protein_coding	0	0	0	0	0	0
ENST00000240662	ENSG00000121361	KCNJ8	protein_coding	0	0	0	0	0	0
ENST00000240687	ENSG00000121377	TAS2R7	protein_coding	0	0	0.156051	0	0.002227	0
ENST00000240691	ENSG00000121381	TAS2R9	protein_coding	0.181375	0	0.119325	0.051408	0.061928	0
ENST00000240719	ENSG00000121406	ZNF549	protein_coding	0.044854	0.15906	0.317836	0.291488	0.283766	0.081175
ENST00000240727	ENSG00000121413	ZSCAN18	protein_coding	0.502182	4.27317	0.646793	0.360259	0.726059	2.22736
ENST00000240731	ENSG00000121417	ZNF211	protein_coding	0	2.68636	4.38017	2.03744	1.33492	3.05659
ENST00000240851	ENSG00000114354	TFG	protein_coding	17.8056	5.02254	6.96395	2.95506	4.84867	2.07841
ENST00000240874	ENSG00000160145	KALRN	protein_coding	0	0	0	0	0	0
ENST00000240922	ENSG00000121579	NAA50	protein_coding	15.0727	12.176	13.6732	11.5128	6.33573	11.9417
ENST00000241001	ENSG00000007372	PAX6	protein_coding	0	0	0	0	0	0
ENST00000241014	ENSG00000121653	MAPK8IP1	protein_coding	0.479921	0.523401	0.548587	0.815875	0.251282	0.324536
ENST00000241041	ENSG00000121680	PEX16	protein_coding	15.8908	13.1337	9.56639	18.568	12.3665	12.8933
ENST00000241051	ENSG00000121690	DEPDC7	protein_coding	0	0	0	0	0	0
ENST00000241052	ENSG00000121691	CAT	protein_coding	12.0222	13.8908	8.61067	14.2241	11.6298	14.4162
ENST00000241069	ENSG00000087085	ACHE	protein_coding	0	0	0	0	0	0
ENST00000241071	ENSG00000106336	FBXO24	protein_coding	0.086238	0.22148	0.305548	0.215306	0.153898	0.140652
ENST00000241124	ENSG00000121742	GJB6	protein_coding	0.11864	0.052695	0	0	0	0
ENST00000241125	ENSG00000121743	GJA3	protein_coding	0	0	0	0.010347	0.012776	0.054365
ENST00000241256	ENSG00000121853	GHSR	protein_coding	0	0	0	0	0	0
ENST00000241261	ENSG00000121858	TNFSF10	protein_coding	7.3294	4.78489	3.73496	18.6114	7.24914	16.3796
ENST00000241274	ENSG00000121871	SLITRK3	protein_coding	0	0	0	0	0	0
ENST00000241305	ENSG00000121898	CPXM2	protein_coding	0	0	0	0	0	0
ENST00000241337	ENSG00000213366	GSTM2	protein_coding	12.7245	12.7856	12.3059	10.8274	19.0219	17.0209
ENST00000241356	ENSG00000282608	ADORA3	protein_coding	0.12902	0	0	0	0.054627	0
ENST00000241391	ENSG00000121964	GTDC1	protein_coding	1.20887	0.707014	1.54546	0	2.6245	0.572928
ENST00000241393	ENSG00000121966	CXCR4	protein_coding	444.309	329.924	308.93	145.785	433.119	195.542
ENST00000241416	ENSG00000121989	ACVR2A	protein_coding	4.07285	4.06326	2.64932	1.88488	2.45817	4.28401
ENST00000241436	ENSG00000122008	POLK	protein_coding	4.23353	3.72466	3.43442	3.80104	4.50169	5.98686
ENST00000241453	ENSG00000122025	FLT3	protein_coding	1.5846	1.1237	0.765865	2.25237	2.33144	1.45906
ENST00000241463	ENSG00000122035	RASL11A	protein_coding	0.384144	0.31782	0.494329	0.73634	0.127997	0.1836
ENST00000241502	ENSG00000122068	FYTTD1	protein_coding	11.9346	12.5185	12.5395	7.00817	10.8939	10.1251
ENST00000241600	ENSG00000122140	MRPS2	protein_coding	3.40634	4.94849	5.11007	4.99113	4.7208	5.28882
ENST00000241651	ENSG00000122180	MYOG	protein_coding	0	0	0	0	0	0
ENST00000241704	ENSG00000122218	COPA	protein_coding	18.2922	21.1331	22.1213	32.8908	23.2768	15.0575
ENST00000241808	ENSG00000122304	PRM2	protein_coding	0	0	0	0	0	0
ENST00000241891	ENSG00000122375	OPN4	protein_coding	0	0	0	0	0	0
ENST00000242057	ENSG00000106546	AHR	protein_coding	17.4207	17.3499	16.4303	24.5533	18.0975	17.6758
ENST00000242059	ENSG00000136193	SCRN1	protein_coding	0	0	1.68632	5.48139	2.73224	2.06028
ENST00000242066	ENSG00000006468	ETV1	protein_coding	0	0	0	0	0	0
ENST00000242067	ENSG00000122507	BBS9	protein_coding	8.84747	6.04467	2.79072	0.533855	2.53621	5.11672
ENST00000242104	ENSG00000122543	OCM	protein_coding	0	0	0	0	0	0
ENST00000242108	ENSG00000122547	EEPD1	protein_coding	1.71235	2.57938	1.43137	3.05838	1.75076	2.27057
ENST00000242140	ENSG00000122574	WIPF3	protein_coding	0	0	0	0	0	0
ENST00000242152	ENSG00000122585	NPY	protein_coding	0	0	0	0	0	0
ENST00000242159	ENSG00000122592	HOXA7	protein_coding	0	0	0	0	0	0
ENST00000242208	ENSG00000122641	INHBA	protein_coding	0	0	0	0.009493	0.010978	0
ENST00000242209	ENSG00000122642	FKBP9	protein_coding	0	0	0	0	0	0
ENST00000242210	ENSG00000122643	NT5C3A	protein_coding	0.925954	2.03504	0.006409	0.07386	1.20733	0.375356
ENST00000242248	ENSG00000122678	POLM	protein_coding	6.44993	4.59066	6.60449	9.99131	4.61657	5.03218
ENST00000242249	ENSG00000122679	RAMP3	protein_coding	0	0	0	0	0.05032	0.042826
ENST00000242257	ENSG00000122687	MRM2	protein_coding	0.341195	0.497231	0.787849	0.4933	0.774375	0.885024
ENST00000242261	ENSG00000122691	TWIST1	protein_coding	0	0	0	0.103661	0	0.102027
ENST00000242275	ENSG00000122696	SLC25A51	protein_coding	8.08598	5.41709	3.67899	1.50376	7.38083	5.19064
ENST00000242285	ENSG00000122705	CLTA	protein_coding	0	0	0	0	0	0.15766
ENST00000242310	ENSG00000122728	TAF1L	protein_coding	0.069687	0.066263	0.075987	0.024789	0.024704	0.048948
ENST00000242315	ENSG00000122733	PHF24	protein_coding	0.01705	0	0	0	0.011643	0.007702
ENST00000242317	ENSG00000122735	DNAI1	protein_coding	0	0	0	0	0	0
ENST00000242323	ENSG00000122741	DCAF10	protein_coding	4.15363	4.35806	4.00876	3.6312	3.51022	5.32631
ENST00000242351	ENSG00000105939	ZC3HAV1	protein_coding	28.669	29.289	33.3168	22.4453	23.9348	28.7808
ENST00000242375	ENSG00000122787	AKR1D1	protein_coding	0	0	0	0	0	0
ENST00000242462	ENSG00000122859	NEUROG3	protein_coding	0	0	0	0	0	0
ENST00000242465	ENSG00000122862	SRGN	protein_coding	158.685	133.251	131.577	150.938	174.002	100.045
ENST00000242480	ENSG00000122877	EGR2	protein_coding	0	0.099194	0.098827	0.66605	0.134423	0.13051
ENST00000242505	ENSG00000138286	FAM149B1	protein_coding	0.558873	1.74559	1.61368	1.87397	1.74893	2.04635
ENST00000242576	ENSG00000076248	UNG	protein_coding	0	0	0	0.48712	0	0.772552
ENST00000242577	ENSG00000088986	DYNLL1	protein_coding	6.06141	6.77624	0.7648	22.6555	4.00445	18.9007
ENST00000242591	ENSG00000122970	IFT81	protein_coding	0.228541	0	0.137429	0.254421	0.271373	0.117936
ENST00000242592	ENSG00000122971	ACADS	protein_coding	4.42102	5.06508	4.56619	8.06422	5.44028	7.44653
ENST00000242607	ENSG00000122986	HVCN1	protein_coding	0	2.25648	1.11488	0.910914	0.472513	0.642749
ENST00000242719	ENSG00000123091	RNF11	protein_coding	20.3445	23.4253	18.5198	17.5407	19.4026	17.5231
ENST00000242728	ENSG00000123095	BHLHE41	protein_coding	0.025408	0	0	0.015003	0.01735	0.014766
ENST00000242729	ENSG00000123096	SSPN	protein_coding	0	0	0	0	0	0
ENST00000242737	ENSG00000123104	ITPR2	protein_coding	0.170466	0.138927	0.138808	0.092305	0.062086	0.045449
ENST00000242770	ENSG00000104915	STX10	protein_coding	0	0.40152	0.48979	0.798914	0.645457	0.540269
ENST00000242776	ENSG00000123136	DDX39A	protein_coding	35.0402	37.1598	34.1153	49.7873	46.3042	41.7008
ENST00000242783	ENSG00000123143	PKN1	protein_coding	53.7615	55.9073	56.9925	100.795	62.6178	67.8734
ENST00000242784	ENSG00000123144	TRIR	protein_coding	27.2424	48.7481	47.3119	49.7625	43.9299	45.7594
ENST00000242786	ENSG00000123146	ADGRE5	protein_coding	33.6414	38.2076	32.2876	64.93	43.5873	53.0529
ENST00000242804	ENSG00000198342	ZNF442	protein_coding	0.139882	0.12072	0.060765	0.142934	0.251025	0.193811
ENST00000242810	ENSG00000114796	KLHL24	protein_coding	2.07069	1.67841	1.51992	1.5626	0.124076	2.93208
ENST00000242819	ENSG00000123171	CCDC70	protein_coding	0	0.050956	0	0	0	0
ENST00000242827	ENSG00000123179	EBPL	protein_coding	0.954608	2.33185	0.245007	9.00974	4.05283	4.99616
ENST00000242839	ENSG00000123191	ATP7B	protein_coding	0.404785	0.443867	0.13804	0.273788	0.314794	0.342415
ENST00000242848	ENSG00000123200	ZC3H13	protein_coding	4.99195	4.44811	4.21474	4.05444	3.98651	6.81482
ENST00000242872	ENSG00000123219	CENPK	protein_coding	3.50793	4.06352	1.31236	0.085028	7.668	0.078812
ENST00000242994	ENSG00000123307	NEUROD4	protein_coding	0	0	0	0	0	0
ENST00000243045	ENSG00000123353	ORMDL2	protein_coding	0.526857	3.25189	2.69796	4.91006	2.70365	5.12076
ENST00000243050	ENSG00000123358	NR4A1	protein_coding	0	0	0	1.59737	0.015762	0.66555
ENST00000243052	ENSG00000123360	PDE1B	protein_coding	4.26917	4.71876	4.65631	5.87863	5.39212	3.45716
ENST00000243056	ENSG00000123364	HOXC13	protein_coding	0	0	0	0	0	0
ENST00000243077	ENSG00000123384	LRP1	protein_coding	3.06322	3.3413	2.84247	13.8972	5.67516	5.22178
ENST00000243082	ENSG00000123388	HOXC11	protein_coding	0	0	0	0	0	0
ENST00000243103	ENSG00000123407	HOXC12	protein_coding	0	0	0	0	0	0
ENST00000243108	ENSG00000197757	HOXC6	protein_coding	0	0	0	0	0	0
ENST00000243112	ENSG00000123415	SMUG1	protein_coding	0	0.956708	0	0	0	0
ENST00000243167	ENSG00000117480	FAAH	protein_coding	1.4202	2.12362	2.0129	2.839	1.92304	2.68495
ENST00000243189	ENSG00000117616	RSRP1	protein_coding	14.7204	18.6789	17.4612	22.6505	18.9533	31.4761
ENST00000243213	ENSG00000123496	IL13RA2	protein_coding	0	0	0	0	0	0
ENST00000243219	ENSG00000112769	LAMA4	protein_coding	0	0	0	0	0	0
ENST00000243222	ENSG00000123500	COL10A1	protein_coding	0.021135	0.510787	0.612659	0.473443	0.354359	0.289525
ENST00000243253	ENSG00000058262	SEC61A1	protein_coding	40.9179	39.726	39.3107	38.8067	43.1377	37.1664
ENST00000243286	ENSG00000196507	TCEAL3	protein_coding	0	0.252308	0	0.349296	0.156491	0.453985
ENST00000243298	ENSG00000123570	RAB9B	protein_coding	0.299126	0.190017	0.067156	0.201719	0.151964	0.218997
ENST00000243300	ENSG00000123572	NRK	protein_coding	0	0	0	0	0	0
ENST00000243314	ENSG00000123584	MAGEA9	protein_coding	0	0	0	0	0	0
ENST00000243325	ENSG00000123595	RAB9A	protein_coding	7.00716	4.42957	3.31221	1.46351	5.83605	1.99614
ENST00000243326	ENSG00000080345	RIF1	protein_coding	8.42724	11.1706	9.45156	5.63267	6.44907	8.27293
ENST00000243344	ENSG00000123607	TTC21B	protein_coding	12.5917	12.7819	14.3354	4.96382	11.3553	11.6346
ENST00000243346	ENSG00000123609	NMI	protein_coding	11.9837	11.3646	13.0224	12.5812	12.8413	17.6594
ENST00000243347	ENSG00000123610	TNFAIP6	protein_coding	0	0.093942	0	0.362543	0	0
ENST00000243349	ENSG00000123612	ACVR1C	protein_coding	2.99058	2.9504	3.34586	0.857355	2.76556	2.19977
ENST00000243389	ENSG00000123643	SLC36A1	protein_coding	1.4409	1.79042	0.666009	2.13211	1.46589	2.8346
ENST00000243440	ENSG00000123685	BATF3	protein_coding	0.493414	0.429164	0.523277	2.86188	0.912999	0.53051
ENST00000243457	ENSG00000123700	KCNJ2	protein_coding	0.071598	0.039	0	0.526021	0.110679	0.078144
ENST00000243498	ENSG00000123737	EXOSC9	protein_coding	8.63125	13.5023	17.1489	4.52322	17.1541	14.4859
ENST00000243501	ENSG00000123739	PLA2G12A	protein_coding	4.47891	4.38087	4.38418	3.10738	3.4159	4.59203
ENST00000243562	ENSG00000090006	LTBP4	protein_coding	0	0	0	0	0.672361	0
ENST00000243563	ENSG00000077312	SNRPA	protein_coding	12.6779	13.5626	7.79571	22.7112	13.9875	7.09101
ENST00000243578	ENSG00000123810	B9D2	protein_coding	5.33611	5.75626	4.77957	9.76988	5.74977	4.58772
ENST00000243583	ENSG00000123815	COQ8B	protein_coding	1.60614	0	0.007429	0	0	0.002574
ENST00000243611	ENSG00000123843	C4BPB	protein_coding	0.412398	0.172109	0.232608	0.064053	0.445832	1.31461
ENST00000243639	ENSG00000204604	ZNF468	protein_coding	1.34801	2.51103	0	0	0	1.28555
ENST00000243643	ENSG00000170954	ZNF415	protein_coding	0	0	0	0	0	0
ENST00000243644	ENSG00000256683	ZNF350	protein_coding	8.36114	8.37522	9.36248	3.02284	8.23526	0.30746
ENST00000243662	ENSG00000123892	RAB38	protein_coding	0.794317	0.536125	0.052195	0.63749	1.11559	0.808698
ENST00000243673	ENSG00000123901	GPR83	protein_coding	0.045534	0.137509	0.125551	0.1025	0.062189	0.079392
ENST00000243706	ENSG00000214367	HAUS3	protein_coding	3.77596	6.78936	7.38968	4.92685	8.77143	7.66781
ENST00000243776	ENSG00000123989	CHPF	protein_coding	1.13916	1.21465	1.38715	3.32352	1.48354	1.73042
ENST00000243786	ENSG00000123999	INHA	protein_coding	0	0	0	0	0	0
ENST00000243806	ENSG00000124019	FAM124B	protein_coding	0.123114	0.020687	0.014928	0.207661	0.260562	0.09153
ENST00000243810	ENSG00000185404	SP140L	protein_coding	0	0	2.86639	0.888157	2.45397	3.86188
ENST00000243878	ENSG00000124074	ENKD1	protein_coding	0.949122	1.05673	1.22019	2.24877	1.21591	1.35972
ENST00000243893	ENSG00000175063	UBE2C	protein_coding	0	0	0	0	0	0
ENST00000243896	ENSG00000080189	SLC35C2	protein_coding	0	1.6308	0	1.40297	2.32179	0
ENST00000243903	ENSG00000101442	ACTR5	protein_coding	8.7668	9.55688	8.31	9.12694	7.35105	7.66849
ENST00000243911	ENSG00000124089	MC3R	protein_coding	0	0	0	0	0	0
ENST00000243913	ENSG00000124091	GCNT7	protein_coding	0.341362	0.208763	0.327354	0.189292	0.278539	0.221288
ENST00000243914	ENSG00000124092	CTCFL	protein_coding	0	0	0	0	0	0
ENST00000243918	ENSG00000204070	SYS1	protein_coding	15.0494	13.9474	14.1395	1.71276	14.3123	11.117
ENST00000243924	ENSG00000124102	PI3	protein_coding	0	0.145782	0.289006	0.688738	0	0.062037
ENST00000243938	ENSG00000124116	WFDC3	protein_coding	0	0	0	0	0	0.056281
ENST00000243964	ENSG00000124140	SLC12A5	protein_coding	0	0	0	0	0	0
ENST00000243967	ENSG00000124143	ARHGAP40	protein_coding	0	0	0	0	0	0
ENST00000243997	ENSG00000124172	ATP5F1E	protein_coding	12.0981	12.9779	12.3433	16.891	13.706	12.0441
ENST00000244007	ENSG00000124181	PLCG1	protein_coding	38.4669	43.281	51.4401	72.168	47.8747	72.1416
ENST00000244020	ENSG00000124193	SRSF6	protein_coding	64.1854	66.1159	61.382	48.6253	67.6169	63.1128
ENST00000244040	ENSG00000124209	RAB22A	protein_coding	5.0499	6.13315	4.9621	5.68244	5.49558	6.59009
ENST00000244043	ENSG00000124212	PTGIS	protein_coding	0	0.014776	0	0	0	0
ENST00000244049	ENSG00000124215	CDH26	protein_coding	0	0	0	0	0	0
ENST00000244050	ENSG00000124216	SNAI1	protein_coding	0.167878	0.195074	0.304159	0.692971	0.337208	0.100353
ENST00000244051	ENSG00000124217	MOCS3	protein_coding	2.32572	1.88698	1.52877	1.45578	1.55176	1.16792
ENST00000244061	ENSG00000124226	RNF114	protein_coding	33.2619	35.6636	34.032	35.0727	35.3844	34.4738
ENST00000244096	ENSG00000124260	MAGEA10	protein_coding	0	0	0	0	0	0
ENST00000244137	ENSG00000124299	PEPD	protein_coding	11.3652	12.8292	12.2523	22.2161	12.5757	15.8784
ENST00000244174	ENSG00000124334	IL9R	protein_coding	0.957855	0.453332	0.405947	0	0.546738	0.960859
ENST00000244204	ENSG00000124357	NAGK	protein_coding	10.1911	6.47264	6.92889	20.7343	4.42677	13.4136
ENST00000244217	ENSG00000124370	MCEE	protein_coding	1.18206	0.818681	0.184762	1.29512	1.44506	1.89182
ENST00000244221	ENSG00000124374	PAIP2B	protein_coding	2.10037	2.10485	1.58678	1.49031	1.5774	2.44038
ENST00000244227	ENSG00000124380	SNRNP27	protein_coding	16.6071	17.9666	13.8175	9.89251	15.6863	12.3903
ENST00000244230	ENSG00000124383	MPHOSPH10	protein_coding	2.35078	2.18887	2.84079	3.22711	3.36634	3.38449
ENST00000244241	ENSG00000124391	IL17C	protein_coding	0.735409	0.479226	0.451203	0.165421	0.408276	0.224315
ENST00000244289	ENSG00000079435	LIPE	protein_coding	1.08082	1.46614	1.11513	1.5251	1.11461	1.83838
ENST00000244293	ENSG00000183668	PSG9	protein_coding	0	0	0	0	0	0
ENST00000244295	ENSG00000243137	PSG4	protein_coding	0	0	0	0	0	0
ENST00000244296	ENSG00000231924	PSG1	protein_coding	0	0	0	0	0	0
ENST00000244303	ENSG00000124440	HIF3A	protein_coding	0	0	0	0	0	0
ENST00000244314	ENSG00000124449	IRGC	protein_coding	0.087986	0.202108	0	0	0	0.102273
ENST00000244333	ENSG00000124466	LYPD3	protein_coding	0.96883	1.66445	0.669675	2.03554	0.371771	1.01601
ENST00000244336	ENSG00000124469	CEACAM8	protein_coding	0	0	0	0.02356	0	0
ENST00000244360	ENSG00000204618	RNF39	protein_coding	0.218563	0.197809	0.367175	0.242567	0.326226	0.260213
ENST00000244364	ENSG00000151914	DST	protein_coding	0.0073	0	0	0	0	0
ENST00000244426	ENSG00000112146	FBXO9	protein_coding	1.30347	1.19449	0.748074	0.344254	0.755932	0.687001
ENST00000244458	ENSG00000124507	PACSIN1	protein_coding	0	0	0	1.09673	1.22291	1.00622
ENST00000244496	ENSG00000124541	RRP36	protein_coding	1.59666	1.42424	1.93659	1.3301	1.84662	1.3855
ENST00000244513	ENSG00000124557	BTN1A1	protein_coding	0.167589	0	0	0	0	0.019571
ENST00000244519	ENSG00000111801	BTN3A3	protein_coding	21.8414	15.8642	9.62996	16.9486	15.5789	32.7783
ENST00000244520	ENSG00000124562	SNRPC	protein_coding	7.10866	8.43462	6.58658	8.60072	4.70667	7.16554
ENST00000244527	ENSG00000124568	SLC17A1	protein_coding	0.052128	0	0	0.031218	0	0.061452
ENST00000244533	ENSG00000124574	ABCC10	protein_coding	5.36784	2.97389	4.69823	7.40658	0.939602	7.0992
ENST00000244534	ENSG00000124575	HIST1H1D	protein_coding	296.689	277.506	247.854	295.411	293.75	262.508
ENST00000244537	ENSG00000274618	HIST1H4F	protein_coding	116.74	116.646	102.272	98.7538	106.54	74.8161
ENST00000244546	ENSG00000124587	PEX6	protein_coding	1.04666	1.2148	0.028717	0.290408	0.295746	0.117697
ENST00000244565	ENSG00000124602	UNC5CL	protein_coding	2.26822	3.02838	2.89171	2.2664	2.43994	2.63611
ENST00000244571	ENSG00000124608	AARS2	protein_coding	9.52377	10.1531	9.44304	9.73424	9.47785	10.6697
ENST00000244573	ENSG00000124610	HIST1H1A	protein_coding	1.82892	1.78747	1.58143	0.128518	1.27838	1.11628
ENST00000244576	ENSG00000124613	ZNF391	protein_coding	0.249436	0.247324	0.411344	0.203697	0.341542	0.499408
ENST00000244623	ENSG00000124657	OR2B6	protein_coding	0	0	0.090781	0	0.16867	0
ENST00000244645	ENSG00000124678	TCP11	protein_coding	0	0	0	0	0	0
ENST00000244669	ENSG00000124701	APOBEC2	protein_coding	0.290237	0.251084	0.11793	0.417586	0.104525	0.049226
ENST00000244670	ENSG00000124702	KLHDC3	protein_coding	1.01604	0.703137	7.0697	1.45677	3.49711	0.032938
ENST00000244709	ENSG00000124731	TREM1	protein_coding	0.597425	1.01497	0.642195	1.25255	0.874448	0.870226
ENST00000244711	ENSG00000124733	MEA1	protein_coding	0	3.2799	0	0	1.01339	0
ENST00000244728	ENSG00000124749	COL21A1	protein_coding	0	0	0	0	0	0
ENST00000244741	ENSG00000124762	CDKN1A	protein_coding	2.90634	2.70276	3.42783	3.77964	5.83791	2.18166
ENST00000244745	ENSG00000124766	SOX4	protein_coding	1.23433	1.91082	2.64283	3.09147	3.06047	1.28341
ENST00000244751	ENSG00000124772	CPNE5	protein_coding	0.360643	0.336364	0.182209	0.467222	0.262357	0.214229
ENST00000244763	ENSG00000124783	SSR1	protein_coding	19.4604	19.4317	13.2721	13.8027	14.5653	17.0544
ENST00000244766	ENSG00000124785	NRN1	protein_coding	0	0	0	0	0	0.069777
ENST00000244769	ENSG00000124788	ATXN1	protein_coding	3.56067	1.05542	3.62876	0.904845	1.14632	1.02068
ENST00000244776	ENSG00000124795	DEK	protein_coding	0.638881	0	0.609749	0	0.42868	0
ENST00000244815	ENSG00000124831	LRRFIP1	protein_coding	4.20857	9.65323	24.8323	13.0424	27.4627	22.2242
ENST00000244869	ENSG00000124882	EREG	protein_coding	0.157944	0.12995	0.238584	0.004114	0.678679	0.072684
ENST00000244891	ENSG00000124900	TRIM51	protein_coding	0	0	0	0	0	0
ENST00000244926	ENSG00000124935	SCGB1D2	protein_coding	0	0	0	0	0	0
ENST00000244930	ENSG00000124939	SCGB2A1	protein_coding	0	0	0	0	0	0
ENST00000245046	ENSG00000125037	EMC3	protein_coding	8.104	8.14352	8.6969	8.03126	7.73042	8.76305
ENST00000245105	ENSG00000125089	SH3TC1	protein_coding	19.2569	14.2965	18.8176	23.2238	19.2496	11.2376
ENST00000245121	ENSG00000167216	KATNAL2	protein_coding	0.11849	0.357934	0.352145	0.15044	0.043831	0
ENST00000245157	ENSG00000125124	BBS2	protein_coding	14.8089	12.1982	15.8352	7.86522	13.8327	14.627
ENST00000245185	ENSG00000125148	MT2A	protein_coding	9.09359	7.02674	11.9872	37.1995	22.6142	25.5082
ENST00000245206	ENSG00000125166	GOT2	protein_coding	9.2608	10.5823	6.75173	13.5441	9.20384	13.8172
ENST00000245222	ENSG00000063176	SPHK2	protein_coding	3.77208	2.86038	3.78868	1.11292	3.14532	2.14816
ENST00000245255	ENSG00000125207	PIWIL1	protein_coding	0	0	0	0	0	0
ENST00000245304	ENSG00000125249	RAP2A	protein_coding	7.80256	5.78986	5.02836	7.03239	6.8115	7.19455
ENST00000245312	ENSG00000125255	SLC10A2	protein_coding	0	0	0	0	0	0
ENST00000245323	ENSG00000125266	EFNB2	protein_coding	0	0	0	0	0	0
ENST00000245382	ENSG00000125319	C17orf53	protein_coding	0	0	0	0	0.024658	0
ENST00000245407	ENSG00000197375	SLC22A5	protein_coding	3.03556	0	2.04336	2.83628	2.05091	2.99899
ENST00000245414	ENSG00000125347	IRF1	protein_coding	119.83	112.32	82.9428	122.52	63.6231	79.6917
ENST00000245441	ENSG00000100503	NIN	protein_coding	13.2027	16.4316	8.28603	6.79301	11.3793	13.7053
ENST00000245448	ENSG00000125375	ATP5S	protein_coding	0.03525	1.62705	2.1904	3.3957	1.65562	2.59357
ENST00000245451	ENSG00000125378	BMP4	protein_coding	0	0	0	0	0.031834	0.017931
ENST00000245457	ENSG00000125384	PTGER2	protein_coding	12.0935	11.5114	9.12364	25.1979	9.81351	22.5064
ENST00000245458	ENSG00000213741	RPS29	protein_coding	848.862	986.258	976.705	1478.78	770.214	920.709
ENST00000245479	ENSG00000125398	SOX9	protein_coding	0	0	0	0	0	0
ENST00000245503	ENSG00000125414	MYH2	protein_coding	0	0	0	0	0	0
ENST00000245539	ENSG00000125445	MRPS7	protein_coding	0.128214	1.18076	0.801795	1.33812	0.653027	0.748322
ENST00000245543	ENSG00000125449	ARMC7	protein_coding	1.856	2.77944	2.73117	4.41787	2.07164	4.47565
ENST00000245544	ENSG00000125450	NUP85	protein_coding	9.82941	9.78568	5.20464	6.94674	8.59216	9.06909
ENST00000245551	ENSG00000125457	MIF4GD	protein_coding	0.394091	0.357405	0.010469	0.739972	0.139902	0.717935
ENST00000245552	ENSG00000125458	NT5C	protein_coding	5.50252	5.54938	7.59496	15.1188	7.45343	6.43622
ENST00000245564	ENSG00000125459	MSTO1	protein_coding	4.58286	4.72934	3.58881	4.53048	4.79141	7.10621
ENST00000245615	ENSG00000125505	MBOAT7	protein_coding	4.16289	6.07792	0	6.21747	2.46342	5.38654
ENST00000245618	ENSG00000131037	EPS8L1	protein_coding	0	0	0	0.489918	0	0
ENST00000245620	ENSG00000204577	LILRB3	protein_coding	0	0	0	2.36562	0.096191	0
ENST00000245621	ENSG00000244482	LILRA6	protein_coding	0	0	0	0.217423	0	0
ENST00000245663	ENSG00000130584	ZBTB46	protein_coding	0.348733	0.431885	0	1.43725	0.677713	0.615094
ENST00000245680	ENSG00000115084	SLC35F5	protein_coding	8.12556	8.00838	7.83275	6.6231	7.51341	7.89431
ENST00000245787	ENSG00000125629	INSIG2	protein_coding	6.37628	5.40149	4.5588	4.73544	4.87897	5.87177
ENST00000245796	ENSG00000125637	PSD4	protein_coding	23.8663	29.6492	26.5999	21.3131	27.5229	36.1605
ENST00000245810	ENSG00000125650	PSPN	protein_coding	0	0	0	0	0	0
ENST00000245812	ENSG00000125652	ALKBH7	protein_coding	22.468	21.9337	15.8259	29.9961	15.3021	15.6422
ENST00000245816	ENSG00000125656	CLPP	protein_coding	12.5826	13.2817	14.1245	20.0935	12.9001	16.3514
ENST00000245817	ENSG00000125657	TNFSF9	protein_coding	0.56288	1.08753	1.34891	1.34806	2.31066	0.817275
ENST00000245838	ENSG00000125676	THOC2	protein_coding	14.0886	12.1522	12.1084	9.42704	12.3816	15.387
ENST00000245857	ENSG00000125691	RPL23	protein_coding	0	0	0	0	0	0
ENST00000245865	ENSG00000266173	STRADA	protein_coding	0.072115	0.026269	0	0.498507	0.784592	0.01444
ENST00000245903	ENSG00000125726	CD70	protein_coding	0.392946	0.368526	0.415248	2.25061	0.271474	0.591768
ENST00000245907	ENSG00000125730	C3	protein_coding	0.046309	0.100424	0.01549	1.82097	0.3685	0.371836
ENST00000245908	ENSG00000125731	SH2D3A	protein_coding	8.66779	11.7307	10.4466	15.4307	9.72333	11.6109
ENST00000245912	ENSG00000125735	TNFSF14	protein_coding	0.468104	0.435538	0.533175	0.755386	0.4703	0.446301
ENST00000245923	ENSG00000125744	RTN2	protein_coding	0	0	0	0	0.5129	0
ENST00000245925	ENSG00000125746	EML2	protein_coding	5.68999	5.89861	1.70985	10.2289	3.55166	9.25906
ENST00000245932	ENSG00000125753	VASP	protein_coding	19.0753	21.7865	14.3857	70.9177	28.4203	35.9758
ENST00000245934	ENSG00000125755	SYMPK	protein_coding	7.09229	7.20574	11.9766	20.9587	8.39138	13.0582
ENST00000245957	ENSG00000089101	CFAP61	protein_coding	0	0.017156	0	0	0	0
ENST00000245960	ENSG00000101224	CDC25B	protein_coding	25.2265	39.8006	30.876	63.2579	28.2117	50.6831
ENST00000245983	ENSG00000125787	GNRH2	protein_coding	0.552014	1.17289	0.481667	0.554769	0.164898	0.580149
ENST00000246006	ENSG00000125810	CD93	protein_coding	1.03741	1.18299	1.1641	4.25657	1.3566	1.56964
ENST00000246012	ENSG00000125815	CST8	protein_coding	0	0	0	0	0	0
ENST00000246015	ENSG00000125818	PSMF1	protein_coding	10.329	0	12.0626	14.4901	7.98271	13.7029
ENST00000246020	ENSG00000125823	CSTL1	protein_coding	0	0	0	0	0	0
ENST00000246024	ENSG00000125827	TMX4	protein_coding	28.237	23.8375	23.799	15.7517	21.2089	16.5057
ENST00000246041	ENSG00000125843	AP5S1	protein_coding	0.004029	0.092466	0.013825	0.041879	0.013026	0.004521
ENST00000246043	ENSG00000125844	RRBP1	protein_coding	0	1.95555	1.3515	0	2.21538	2.25807
ENST00000246069	ENSG00000125868	DSTN	protein_coding	9.12351	8.72384	6.49381	6.37466	8.46296	8.55805
ENST00000246070	ENSG00000125869	LAMP5	protein_coding	0.441488	0.427456	0.102194	0.286177	1.95633	0.61736
ENST00000246071	ENSG00000125870	SNRPB2	protein_coding	3.15013	7.26088	5.29098	4.96951	2.50799	3.34642
ENST00000246080	ENSG00000125878	TCF15	protein_coding	0	0	0	0	0	0
ENST00000246081	ENSG00000125879	OTOR	protein_coding	0	0.031997	0	0	0.021635	0
ENST00000246090	ENSG00000125888	BANF2	protein_coding	0	0	0	0	0	0
ENST00000246100	ENSG00000125898	FAM110A	protein_coding	0.047011	0.077182	0.060893	0.057655	0.064183	0.059812
ENST00000246104	ENSG00000215397	SCRT2	protein_coding	0	0	0	0	0	0
ENST00000246105	ENSG00000125903	DEFB129	protein_coding	0	0	0	0	0	0
ENST00000246108	ENSG00000244588	RAD21L1	protein_coding	0	0	0	0.098032	0.110253	0
ENST00000246112	ENSG00000104953	TLE6	protein_coding	0	0.076372	0	0	0	0.02308
ENST00000246115	ENSG00000125910	S1PR4	protein_coding	88.6582	92.0521	84.1948	146.336	77.8128	92.5172
ENST00000246117	ENSG00000125912	NCLN	protein_coding	18.5517	17.8557	24.0866	24.9105	20.1747	17.6379
ENST00000246139	ENSG00000125931	CITED1	protein_coding	0.078931	0	0	0.026105	0.142082	0.092054
ENST00000246149	ENSG00000131503	ANKHD1	protein_coding	5.53243	5.09027	5.1468	1.79519	4.31448	3.40883
ENST00000246151	ENSG00000057757	PITHD1	protein_coding	26.2011	26.2644	23.4206	18.8229	22.9414	22.8154
ENST00000246163	ENSG00000125952	MAX	protein_coding	16.6851	21.0475	23.5726	16.0764	23.9926	17.1096
ENST00000246166	ENSG00000257365	FNTB	protein_coding	3.95972	3.39168	3.54853	4.13746	3.15659	3.56872
ENST00000246174	ENSG00000125962	ARMCX5	protein_coding	0	0.055378	0	0.063512	0	0.099832
ENST00000246186	ENSG00000125966	MMP24	protein_coding	0.620606	0.777508	0.683173	0.681336	0.639569	0.48127
ENST00000246190	ENSG00000125967	NECAB3	protein_coding	1.67417	1.48267	1.27944	6.21912	1.20598	2.94602
ENST00000246194	ENSG00000125970	RALY	protein_coding	5.20126	5.52979	6.65114	7.68535	7.18958	4.39894
ENST00000246199	ENSG00000125975	C20orf173	protein_coding	0	0	0	0	0	0
ENST00000246229	ENSG00000126003	PLAGL2	protein_coding	7.72109	8.91449	8.15108	13.5635	9.14606	8.57455
ENST00000246314	ENSG00000126070	AGO3	protein_coding	0.1847	0	0	0	0.147062	0.530054
ENST00000246337	ENSG00000126088	UROD	protein_coding	11.5331	8.50641	6.12942	12.9807	2.61055	8.67301
ENST00000246489	ENSG00000126214	KLC1	protein_coding	0	11.3072	8.44461	5.33953	14.3398	8.04333
ENST00000246505	ENSG00000126226	PCID2	protein_coding	0.993952	3.96813	0.181683	0.607805	0.447246	0.937008
ENST00000246515	ENSG00000126233	SLURP1	protein_coding	0	0	0	0	0	0
ENST00000246529	ENSG00000126243	LRFN3	protein_coding	0.902292	0.402459	0.717212	2.60949	0.820347	0.824886
ENST00000246532	ENSG00000126246	IGFLR1	protein_coding	5.24272	2.22477	3.02899	4.43033	1.96595	3.50454
ENST00000246533	ENSG00000126247	CAPNS1	protein_coding	16.3067	18.0815	13.949	29.1328	13.9486	13.6612
ENST00000246535	ENSG00000126249	PDCD2L	protein_coding	0.367578	2.47096	1.37324	4.98694	2.06458	3.51015
ENST00000246548	ENSG00000126261	UBA2	protein_coding	19.4179	17.6209	17.6322	13.1832	15.5934	17.8673
ENST00000246549	ENSG00000126262	FFAR2	protein_coding	0.118831	0.686975	0.20083	2.70761	0.388548	0.703622
ENST00000246551	ENSG00000126264	HCST	protein_coding	11.1346	12.3105	10.6274	24.1553	9.99899	21.5411
ENST00000246553	ENSG00000126266	FFAR1	protein_coding	0	0.036398	0.005427	0.02383	0.027271	0
ENST00000246554	ENSG00000126267	COX6B1	protein_coding	17.7819	24.4975	20.3084	37.7617	20.0976	27.5792
ENST00000246635	ENSG00000171401	KRT13	protein_coding	0	0	0	0	0	0
ENST00000246639	ENSG00000197079	KRT35	protein_coding	0	0	0	0	0	0
ENST00000246646	ENSG00000171360	KRT38	protein_coding	0	0	0	0.024633	0	0
ENST00000246657	ENSG00000126353	CCR7	protein_coding	79.2976	134.314	140.899	68.4117	108.332	70.7762
ENST00000246662	ENSG00000171403	KRT9	protein_coding	0	0	0	0	0	0
ENST00000246672	ENSG00000126368	NR1D1	protein_coding	14.3598	15.4267	12.024	12.3234	10.2868	10.8647
ENST00000246747	ENSG00000213465	ARL2	protein_coding	0.843181	1.1017	3.03228	1.67758	1.62309	1.59805
ENST00000246784	ENSG00000126453	BCL2L12	protein_coding	0.098499	0.973829	0.00667	0.56596	0.058265	0.000543
ENST00000246785	ENSG00000126453	BCL2L12	protein_coding	2.50078	3.36264	0.021318	4.59414	3.41239	0.94597
ENST00000246792	ENSG00000126458	RRAS	protein_coding	2.43598	4.1294	2.54705	8.8096	3.74292	5.71313
ENST00000246794	ENSG00000126460	PRRG2	protein_coding	0.0425	0.574339	0.022026	0.398812	0.14225	0.117332
ENST00000246801	ENSG00000126467	TSKS	protein_coding	0.44026	0.685851	0.751949	0.995602	0.379628	0.379456
ENST00000246802	ENSG00000105373	NOP53	protein_coding	166.478	198.765	235.614	228.279	185.647	189.057
ENST00000246841	ENSG00000126500	FLRT1	protein_coding	0	0.021301	0.058021	0.264726	0.101742	0.042995
ENST00000246868	ENSG00000126524	SBDS	protein_coding	58.1712	51.7602	49.1499	32.9581	51.6237	38.7458
ENST00000246891	ENSG00000126545	CSN1S1	protein_coding	0	0	0	0	0	0
ENST00000246895	ENSG00000126549	STATH	protein_coding	0	0	0	0	0	0
ENST00000246896	ENSG00000126550	HTN1	protein_coding	0	0	0	0	0	0
ENST00000246912	ENSG00000108788	MLX	protein_coding	5.00498	3.28771	0.805893	0.010934	3.97765	3.54717
ENST00000246914	ENSG00000126562	WNK4	protein_coding	0.20441	0.215054	0.252632	0.183124	0.232084	0.13621
ENST00000246949	ENSG00000213918	DNASE1	protein_coding	0.666534	1.64047	1.59337	3.39094	1.33475	3.4668
ENST00000246957	ENSG00000126602	TRAP1	protein_coding	5.98207	5.60023	6.29201	7.43762	3.7201	6.86271
ENST00000247001	ENSG00000105705	SUGP1	protein_coding	7.33193	8.48504	10.032	7.79156	7.81895	9.35669
ENST00000247003	ENSG00000105671	DDX49	protein_coding	4.56947	9.75984	9.9522	15.7894	11.4214	10.6681
ENST00000247005	ENSG00000130283	GDF1	protein_coding	0	0	0.021155	0	0	0
ENST00000247020	ENSG00000132581	SDF2	protein_coding	6.89201	7.52593	5.75597	10.9383	6.87155	9.3826
ENST00000247026	ENSG00000126653	NSRP1	protein_coding	2.21625	1.89071	4.80243	0	1.13724	0.434316
ENST00000247087	ENSG00000126705	AHDC1	protein_coding	2.6864	2.53539	0	3.7633	2.75733	1.70795
ENST00000247138	ENSG00000102100	SLC35A2	protein_coding	0	0	0.006854	2.5508	0.000893	0.00118
ENST00000247140	ENSG00000102103	PQBP1	protein_coding	5.92113	5.41335	5.3686	5.75512	4.61941	5.39217
ENST00000247153	ENSG00000126759	CFP	protein_coding	0	0.064701	0.160202	0	0.001166	0.035253
ENST00000247161	ENSG00000126767	ELK1	protein_coding	8.65099	6.75846	7.26305	11.7487	6.49412	9.85484
ENST00000247178	ENSG00000126775	ATG14	protein_coding	16.4933	15.0837	17.9935	9.79869	17.3633	11.2977
ENST00000247182	ENSG00000126778	SIX1	protein_coding	0	0	0	0	0	0
ENST00000247191	ENSG00000126787	DLGAP5	protein_coding	0.079793	0.332258	0	0	0.126891	0
[truncated: 111,040 more rows]

## Sheet: summary of gene FPKM
Summary of gene FPKM values
Gene ID	Gene_symbol	Gene_type	HC	HC	EC	EC	HP	HP
ENSG00000145416	1-Mar	protein_coding	1.05742	2.00348	0.59245	5.8021	3.61861	2.80732
ENSG00000186205	1-Mar	protein_coding	0.023292	0	0	0.046405	0	0.015233
ENSG00000099785	2-Mar	protein_coding	16.8549	12.719	11.4954	22.0675	19.89	14.2147
ENSG00000117791	2-Mar	protein_coding	0.072782	0.072045	0	0	0	0
ENSG00000173926	3-Mar	protein_coding	1.57278	4.22832	3.77364	2.67561	4.06435	3.5352
ENSG00000198060	5-Mar	protein_coding	11.3821	11.0049	10.9706	9.00719	11.9648	8.83508
ENSG00000145495	6-Mar	protein_coding	46.4889	47.8543	55.101	28.3901	47.3573	38.4455
ENSG00000136536	7-Mar	protein_coding	44.1249	45.1044	40.5913	37.8558	34.3049	33.8582
ENSG00000165406	8-Mar	protein_coding	35.0744	30.8084	31.1868	25.5131	30.3967	27.8063
ENSG00000139266	9-Mar	protein_coding	14.7986	18.6811	13.524	18.8353	12.8912	21.314
ENSG00000173838	10-Mar	protein_coding	0.03925	0	0.023718	0.017246	0	0.016239
ENSG00000180096	1-Sep	protein_coding	44.6032	60.678	54.957	92.9631	47.7303	84.6081
ENSG00000168385	2-Sep	protein_coding	48.1252	69.4134	57.0146	30.7869	50.7852	50.941
ENSG00000108387	4-Sep	protein_coding	0.105822	0.086352	0.104308	0.018096	0.207843	0.083609
ENSG00000184702	5-Sep	protein_coding	1.56242	2.66786	0.089167	0.11829	0.664734	0.075175
ENSG00000125354	6-Sep	protein_coding	44.3265	74.9977	59.148	52.0567	44.4408	78.1008
ENSG00000122545	7-Sep	protein_coding	30.949	29.358	25.0272	21.9487	30.1805	28.003
ENSG00000164402	8-Sep	protein_coding	2.50917	1.89404	1.90359	1.61686	1.98785	2.52652
ENSG00000184640	9-Sep	protein_coding	156.059	234.403	216.789	263.065	119.329	208.299
ENSG00000186522	10-Sep	protein_coding	1.04289	0.37745	0.21922	0.214811	0.245023	0.74351
ENSG00000138758	11-Sep	protein_coding	5.88921	8.6194	6.33435	7.8831	7.18765	9.54625
ENSG00000140623	12-Sep	protein_coding	0	0	0.058214	0	0.072312	0
ENSG00000173077	1-Dec	protein_coding	0	0	0	0	0	0
ENSG00000100167	3-Sep	protein_coding	0.02294	0.017973	0	0.112138	0.07327	0.073165
ENSG00000121410	A1BG	protein_coding	2.1113	1.5786	1.6429	3.76561	1.80556	1.44799
ENSG00000148584	A1CF	protein_coding	0	0	0	0	0	0
ENSG00000175899	A2M	protein_coding	1.66533	1.04251	0.623959	0.576648	0.601124	0.637919
ENSG00000166535	A2ML1	protein_coding	0	0	0	0	0	0
ENSG00000184389	A3GALT2	protein_coding	0.314621	0.147491	0.212499	0.225427	0.541079	0.444048
ENSG00000128274	A4GALT	protein_coding	0	0.041662	0	0	0.028683	0
ENSG00000094914	AAAS	protein_coding	7.54192	7.90951	6.47234	11.5049	9.07918	10.1662
ENSG00000081760	AACS	protein_coding	3.31421	3.5533	4.31474	3.92356	4.22602	3.3588
ENSG00000158122	AAED1	protein_coding	6.99644	5.5597	4.70163	3.31412	5.15674	4.32107
ENSG00000103591	AAGAB	protein_coding	10.7919	10.0006	8.11114	10.18	9.87473	11.2313
ENSG00000115977	AAK1	protein_coding	119.882	137.905	144.836	75.6779	127.755	144.604
ENSG00000087884	AAMDC	protein_coding	1.75413	1.24242	1.22847	1.02062	1.04266	1.15591
ENSG00000127837	AAMP	protein_coding	11.849	14.5447	13.4488	23.3359	13.8403	19.4691
ENSG00000129673	AANAT	protein_coding	0	0.087648	0.134613	0.067913	0.011822	0.085064
ENSG00000131043	AAR2	protein_coding	13.9299	14.9271	14.0557	12.7373	15.7901	12.6069
ENSG00000205002	AARD	protein_coding	0.039229	0	0	0	0	0
ENSG00000090861	AARS	protein_coding	5.09959	6.33808	5.17469	11.9872	5.24163	12.6723
ENSG00000124608	AARS2	protein_coding	9.52377	10.1531	9.44304	9.73424	9.47785	10.6697
ENSG00000266967	AARSD1	protein_coding	1.41784	6.00047	6.67238	5.26828	5.30987	7.37101
ENSG00000157426	AASDH	protein_coding	5.19216	5.00743	4.44154	4.24982	4.92635	7.05663
ENSG00000149313	AASDHPPT	protein_coding	10.6532	7.78926	7.4672	7.58525	6.97633	9.16353
ENSG00000008311	AASS	protein_coding	1.40265	1.08864	0.730237	0.348604	2.06618	2.66539
ENSG00000275700	AATF	protein_coding	18.4546	17.7872	19.0481	19.2479	21.3382	18.9352
ENSG00000181409	AATK	protein_coding	0.188262	0.746197	0.258849	0.870565	0.14494	2.63336
ENSG00000183044	ABAT	protein_coding	3.59221	2.60671	3.2338	3.20593	2.06235	2.75518
ENSG00000165029	ABCA1	protein_coding	2.57005	4.23424	3.94176	1.23463	4.79324	4.15118
ENSG00000154263	ABCA10	protein_coding	1.43409	1.13497	1.60027	0.482812	0.806831	1.11654
ENSG00000179869	ABCA13	protein_coding	0.005617	0.009317	0.004976	0.005008	0.005218	0.013013
ENSG00000107331	ABCA2	protein_coding	25.0771	20.6437	25.0355	27.584	25.3192	25.7578
ENSG00000167972	ABCA3	protein_coding	2.28253	2.52508	3.06413	2.45032	2.08288	3.28366
ENSG00000154265	ABCA5	protein_coding	22.3701	22.938	19.6389	10.6361	18.88	17.3666
ENSG00000154262	ABCA6	protein_coding	0.142786	0.105363	0.292703	0.086315	0.26817	0.25004
ENSG00000064687	ABCA7	protein_coding	26.8918	31.8128	31.1821	66.8573	34.0108	59.5997
ENSG00000141338	ABCA8	protein_coding	0.015961	0.028891	0	0	0	0
ENSG00000154258	ABCA9	protein_coding	0.029932	0	0.043268	0	0.02446	0.112538
ENSG00000085563	ABCB1	protein_coding	3.17359	3.98588	2.38855	0.560545	1.34403	2.42072
ENSG00000135776	ABCB10	protein_coding	7.18685	8.57231	9.01426	11.9917	8.56012	10.1367
ENSG00000005471	ABCB4	protein_coding	0.066488	0.059311	0.040467	0.112854	0.166836	0.021141
ENSG00000115657	ABCB6	protein_coding	0.916292	1.12685	1.23509	2.46294	1.1677	2.31526
ENSG00000131269	ABCB7	protein_coding	10.3999	12.0089	10.4791	9.02272	7.85386	9.84465
ENSG00000197150	ABCB8	protein_coding	10.5712	12.8821	11.4293	19.727	14.2101	17.9467
ENSG00000150967	ABCB9	protein_coding	2.72683	2.27091	4.02441	5.11326	2.71782	5.02772
ENSG00000103222	ABCC1	protein_coding	29.9429	30.7237	39.8085	41.8117	38.4542	31.7024
ENSG00000124574	ABCC10	protein_coding	11.8079	12.6926	12.9079	20.5761	11.6116	18.2136
ENSG00000121270	ABCC11	protein_coding	0.019984	0	0	0	0.005518	0
ENSG00000023839	ABCC2	protein_coding	1.73919	2.12068	2.47226	0.94133	1.47748	1.92277
ENSG00000108846	ABCC3	protein_coding	0.841817	1.14813	0.147383	5.48204	1.23515	1.01348
ENSG00000125257	ABCC4	protein_coding	4.74683	3.6858	3.4064	3.5285	4.13541	6.14844
ENSG00000114770	ABCC5	protein_coding	7.58173	8.52931	7.25175	8.40392	8.02191	12.1538
ENSG00000091262	ABCC6	protein_coding	0.041565	0.024046	0.047359	0.049765	0.123357	0.079189
ENSG00000006071	ABCC8	protein_coding	0	0.013267	0	0.005844	0	0
ENSG00000069431	ABCC9	protein_coding	0	0	0	0	0	0
ENSG00000101986	ABCD1	protein_coding	4.08183	3.85754	2.30193	7.62722	3.79598	6.59067
ENSG00000173208	ABCD2	protein_coding	7.08287	7.39961	4.67596	7.42515	4.57277	10.9944
ENSG00000117528	ABCD3	protein_coding	12.0032	9.33603	10.8902	8.62247	9.58254	9.6502
ENSG00000119688	ABCD4	protein_coding	15.1004	17.0784	18.0052	15.4228	16.6388	17.1422
ENSG00000164163	ABCE1	protein_coding	25.1444	22.0311	20.9941	14.4465	21.5141	19.6204
ENSG00000204574	ABCF1	protein_coding	10.32	13.3958	13.7515	19.994	14.4136	18.7757
ENSG00000033050	ABCF2	protein_coding	6.44337	7.1527	6.26503	13.9169	6.09963	11.6941
ENSG00000285292	ABCF2	protein_coding	1.36717	0.663593	0.72943	1.07581	0.728355	0.579706
ENSG00000161204	ABCF3	protein_coding	15.5446	14.771	16.111	16.2113	15.5056	16.3325
ENSG00000160179	ABCG1	protein_coding	9.44511	12.7827	11.2181	11.5559	9.22544	10.7839
ENSG00000118777	ABCG2	protein_coding	0.221098	0.213834	0.287219	0.122113	0.215676	0.31994
ENSG00000143921	ABCG8	protein_coding	0	0	0.023166	0.069693	0	0
ENSG00000143994	ABHD1	protein_coding	0.266251	0.612304	0.587201	0.225194	0.376419	0.264872
ENSG00000144827	ABHD10	protein_coding	9.53695	8.50014	7.95242	5.0258	8.51686	7.6553
ENSG00000106077	ABHD11	protein_coding	2.5828	2.97628	2.44398	6.97049	3.53947	4.0053
ENSG00000100997	ABHD12	protein_coding	12.2123	12.6369	14.0355	21.9365	15.5405	14.9991
ENSG00000139826	ABHD13	protein_coding	19.3065	15.9688	13.6524	7.60009	14.0386	11.3043
ENSG00000248487	ABHD14A	protein_coding	4.61125	5.68306	3.95938	8.51839	3.49419	7.87735
ENSG00000114786	ABHD14A-ACY1	protein_coding	0.244581	0	0	0	0.443252	0
ENSG00000114779	ABHD14B	protein_coding	17.1318	20.2447	11.2552	24.9924	11.9553	20.3421
ENSG00000168792	ABHD15	protein_coding	6.45214	7.91321	4.77171	11.9887	7.92283	9.42541
ENSG00000204427	ABHD16A	protein_coding	10.7333	9.80542	8.86174	15.696	9.70945	13.3339
ENSG00000183260	ABHD16B	protein_coding	1.87132	2.21339	1.4094	3.42105	1.8872	2.55416
ENSG00000129968	ABHD17A	protein_coding	41.3237	57.5594	40.0694	75.3338	62.8942	65.3026
ENSG00000107362	ABHD17B	protein_coding	12.3399	9.65983	13.8473	11.2884	12.9603	8.91291
ENSG00000136379	ABHD17C	protein_coding	0.820506	0.937309	0.358484	0.76091	1.10861	0.73424
ENSG00000164074	ABHD18	protein_coding	12.3812	11.4789	11.7816	9.53703	10.9519	13.994
ENSG00000140526	ABHD2	protein_coding	19.0796	15.6406	17.4384	18.7066	23.3791	18.6875
ENSG00000158201	ABHD3	protein_coding	12.7357	15.5945	12.9263	16.8448	14.832	21.5672
ENSG00000100439	ABHD4	protein_coding	3.08319	3.76954	2.93067	3.15215	2.82685	2.84572
ENSG00000011198	ABHD5	protein_coding	4.93161	2.5665	2.32938	2.819	2.93483	2.94573
ENSG00000163686	ABHD6	protein_coding	1.5556	1.51918	1.01638	3.57678	1.52127	2.01398
ENSG00000127220	ABHD8	protein_coding	3.68355	4.23434	2.9573	6.6893	3.17555	3.79728
ENSG00000136754	ABI1	protein_coding	33.6092	29.065	34.7864	21.8518	35.5332	28.1973
ENSG00000138443	ABI2	protein_coding	4.20149	6.1121	5.3808	3.57827	3.74358	5.88893
ENSG00000108798	ABI3	protein_coding	9.14134	6.22092	3.44404	15.7342	10.3935	8.14946
ENSG00000154175	ABI3BP	protein_coding	0.028745	0.023834	0	0.024782	0.034803	0.008353
ENSG00000097007	ABL1	protein_coding	9.23452	11.4371	10.8516	11.4285	12.229	12.3591
ENSG00000143322	ABL2	protein_coding	8.1626	7.10647	8.84828	4.5018	8.92044	5.63624
ENSG00000099204	ABLIM1	protein_coding	91.1356	95.5411	80.604	68.5778	81.1333	103.074
ENSG00000163995	ABLIM2	protein_coding	0.949131	0.926934	0.898374	0.953946	1.38988	1.00231
ENSG00000173210	ABLIM3	protein_coding	0.155974	0.487226	0.018717	0.024419	0.115399	0
ENSG00000175164	ABO	protein_coding	0.308499	3.30886	0	0.304833	5.61079	0.035883
ENSG00000159842	ABR	protein_coding	20.1929	28.9915	20.4921	51.963	32.0147	35.0535
ENSG00000174429	ABRA	protein_coding	0.106159	0.091495	0	0	0.096658	0.041132
ENSG00000146386	ABRACL	protein_coding	19.2657	21.8422	14.8606	27.3444	20.9654	32.5003
ENSG00000163322	ABRAXAS1	protein_coding	7.38849	8.33809	8.5197	5.23306	6.1734	8.28332
ENSG00000165660	ABRAXAS2	protein_coding	6.94447	5.18679	6.22935	3.97573	6.26134	5.38331
ENSG00000146109	ABT1	protein_coding	22.9721	20.8109	18.1661	12.3165	19.3494	13.0737
ENSG00000114626	ABTB1	protein_coding	37.2241	41.9677	41.3772	51.6956	32.8654	40.0483
ENSG00000166016	ABTB2	protein_coding	0.115654	0.27077	0.443027	0.247109	0.375094	0.287551
ENSG00000283208	AC001226.2	protein_coding	1.72376	1.69147	1.61219	1.15967	1.85047	0.936671
ENSG00000273171	AC002094.3	protein_coding	0	0	0	0.178948	0	0.003329
ENSG00000260869	AC002310.4	protein_coding	2.8546	0	0	0	0	0
ENSG00000257767	AC002996.1	protein_coding	0	0	0	0	0	0
ENSG00000268133	AC003002.1	protein_coding	0	0	0	0	0	0.103991
ENSG00000268533	AC003002.2	protein_coding	1.53514	1.18043	1.41532	3.19092	2.38498	1.49665
ENSG00000269533	AC003002.3	protein_coding	0.030447	0	0	0	0.069539	0
ENSG00000268163	AC004076.1	protein_coding	0.717159	0	0.072408	0.608778	0	0.209965
ENSG00000267618	AC004223.3	protein_coding	0.43201	0.164076	0.103735	0.48099	0.345224	0.62086
ENSG00000270168	AC004233.2	protein_coding	0	0	0	0	0	0
ENSG00000276345	AC004556.1	protein_coding	7.24768	6.3089	10.5537	9.14365	3.91972	12.1373
ENSG00000285162	AC004593.3	protein_coding	0.025119	0	0	0.155538	0	0.381022
ENSG00000250424	AC004691.2	protein_coding	0	0	0.110268	0	0	0
ENSG00000269881	AC004754.1	protein_coding	0	0.613783	0.106098	4.53325	0.305712	0.803579
ENSG00000249590	AC004832.3	protein_coding	0	0	0	0.043082	0	0
ENSG00000284292	AC004922.1	protein_coding	0.455313	0	0	2.09282	0.010779	1.24208
ENSG00000248751	AC004997.1	protein_coding	1.0558	0	0	0	0	0
ENSG00000251537	AC005324.3	protein_coding	0.35725	0.113317	0	0	0.150438	0.130046
ENSG00000284638	AC005551.1	protein_coding	0.156615	0.227824	0.522169	0.104922	0	0.215247
ENSG00000266202	AC005697.1	protein_coding	0	0	0	0	0	0
ENSG00000267318	AC005702.1	protein_coding	0	0	0.081959	0	0.037833	0
ENSG00000258472	AC005726.1	protein_coding	1.52251	1.6589	2.09029	2.08343	1.76465	2.14577
ENSG00000268643	AC006486.1	protein_coding	0	1.30573	0	0.95377	0.738023	0
ENSG00000284826	AC006518.7	protein_coding	0	0	0	0	0	0
ENSG00000258881	AC007040.2	protein_coding	0.194247	0.086842	0.054739	0.130643	0.041406	0.105856
ENSG00000277196	AC007325.2	protein_coding	0	0	0	0	0	0.019257
ENSG00000278817	AC007325.4	protein_coding	1.63322	2.46797	1.52984	1.23198	1.22361	1.34021
ENSG00000283809	AC007326.4	protein_coding	0.091595	0.162171	0.192371	0.398495	0.129585	0.153166
ENSG00000267140	AC007998.2	protein_coding	0	0.361076	0	0	0.600213	0.779215
ENSG00000284797	AC008397.1	protein_coding	0.154308	0	0.074961	0	0	0.0312
ENSG00000285188	AC008397.2	protein_coding	0	0.010634	0.052416	0	0.024835	0
ENSG00000268465	AC008403.1	protein_coding	0	0.345275	0	0	0	0
ENSG00000268655	AC008687.4	protein_coding	0	0	0	0.100541	0	0.013411
ENSG00000196826	AC008758.1	protein_coding	0	0	0	0	0	0.087266
ENSG00000268870	AC008758.5	protein_coding	0	0	0.329849	0	0.157697	0.104582
ENSG00000269711	AC008763.3	protein_coding	0	0	0	0	0	0
ENSG00000267179	AC008770.2	protein_coding	0.394671	0.233988	0.108781	0.25353	0.145281	0.244905
ENSG00000268861	AC008878.3	protein_coding	10.0438	67.0414	11.2019	17.0028	9.34672	14.1522
ENSG00000268083	AC008982.1	protein_coding	0	0	0	0	15.7311	0
ENSG00000277669	AC009086.2	protein_coding	0	0	0.386399	0	0.100262	0
ENSG00000260300	AC009119.2	protein_coding	0	0.093333	0.038991	0.267647	0.221301	0.065804
ENSG00000261717	AC009163.4	protein_coding	0	0.951903	0.00196	1e-06	0.002532	0.683913
ENSG00000284479	AC009477.2	protein_coding	0	0	0	0	0.182978	0
ENSG00000258311	AC009779.3	protein_coding	2.47555	2.0968	2.46004	2.31504	3.99697	1.8113
ENSG00000250803	AC010255.3	protein_coding	0.020549	0	0	0	0	0
ENSG00000261341	AC010325.1	protein_coding	1.09144	1.01775	1.62567	0.502741	0.576068	0.608778
ENSG00000268750	AC010522.1	protein_coding	3.56357	3.83844	2.23325	0.245476	2.28686	2.28997
ENSG00000131152	AC010531.1	protein_coding	0	0	0	0	0	0
ENSG00000268041	AC010616.1	protein_coding	3.86985	4.3267	5.27328	5.96508	3.18266	4.75349
ENSG00000230626	AC011005.1	protein_coding	0.306953	0	0.135869	0.156033	0	0.067291
ENSG00000276256	AC011043.1	protein_coding	0.086682	0.216051	0	0.03016	0.293057	0.250901
ENSG00000278198	AC011043.2	protein_coding	0	0	0	0	0	0
ENSG00000266826	AC011195.2	protein_coding	0	0	0	0	0	0
ENSG00000258674	AC011448.1	protein_coding	1.07212	0.261555	0.542534	1.59683	1.02425	1.66119
ENSG00000255730	AC011462.1	protein_coding	0	0	0	0	0	0
ENSG00000267748	AC011479.1	protein_coding	0.486489	0.384579	0	0	0	0.287958
ENSG00000267157	AC011499.1	protein_coding	0	0	0	0	0	0
ENSG00000267360	AC012309.1	protein_coding	0	0	0	0	0	0
ENSG00000285396	AC012476.1	protein_coding	0.553829	0.335517	0	0.060213	0.267958	0.298555
ENSG00000279765	AC013394.1	protein_coding	9.33205	9.11822	9.65642	10.3694	10.4348	8.16459
ENSG00000284526	AC015802.6	protein_coding	0.592534	0.443087	0.280865	0.061089	0.385275	0.301854
ENSG00000266086	AC015813.2	protein_coding	1.00737	0.980796	1.54027	1.21066	0.499941	1.16391
ENSG00000278499	AC018554.3	protein_coding	0	0	0	0	0	0
ENSG00000275778	AC018630.2	protein_coding	8.58559	8.83053	8.43009	5.54403	10.3027	7.89829
ENSG00000268500	AC018755.2	protein_coding	0	0	0	0.010883	0	0
ENSG00000283321	AC019117.3	protein_coding	0	0	0	0	0	0
ENSG00000142539	AC020909.1	protein_coding	0	0	0	0.001104	0.012944	0
ENSG00000283536	AC021072.1	protein_coding	0	0	0	0.005286	0	0
ENSG00000285480	AC021097.2	protein_coding	0.293603	2.19939	1.43786	1.10408	0.813882	2.61094
ENSG00000283516	AC022167.5	protein_coding	0.222207	0.096551	0.272849	0.073608	0.259619	0.06849
ENSG00000284762	AC022414.1	protein_coding	0.01812	0	0	0	0	0
ENSG00000285133	AC022506.1	protein_coding	0.002182	0.005595	0.002308	0.000701	0.001113	0.000751
ENSG00000267281	AC023509.3	protein_coding	0.400501	0.869303	0.317604	0.105414	0.505123	0
ENSG00000267740	AC024592.3	protein_coding	2.31219	1.17292	2.339	1.08499	1.52473	0.770811
ENSG00000257921	AC025165.3	protein_coding	0.93069	0.250486	0.245204	0.63945	0.717353	0.441574
ENSG00000262621	AC025283.2	protein_coding	0.925189	0.955875	0.728958	1.04659	0.809261	0.913291
ENSG00000284484	AC025287.4	protein_coding	0	0.101075	0	0	0.053688	0.091233
ENSG00000260371	AC026464.3	protein_coding	1.2385	0	0	0.904223	0.432404	0
ENSG00000260914	AC026464.4	protein_coding	0	0	2.77259	0	0	0
ENSG00000248235	AC037459.1	protein_coding	0.812467	0.371508	0.668316	1.43496	0.701257	0.686258
ENSG00000282278	AC058822.1	protein_coding	0.037212	0	0	0	0	0
ENSG00000249319	AC068533.4	protein_coding	0	0	0	0.735447	0	0
ENSG00000250644	AC068580.4	protein_coding	0.888377	1.97966	1.2574	2.5379	1.89237	1.56087
ENSG00000283149	AC068631.2	protein_coding	0	0	0	0	0	0.509154
ENSG00000255641	AC068775.1	protein_coding	0	0	0	0	0	0
ENSG00000274874	AC068790.8	protein_coding	0.423088	0	0.670117	0.032848	0.065604	0.029861
ENSG00000284730	AC068987.5	protein_coding	0.502097	1.12751	0.692562	0.288125	0.472148	0.26904
ENSG00000249240	AC069368.1	protein_coding	0	0	0	0	0	0
ENSG00000284041	AC073111.3	protein_coding	0	0	0.334799	0	0	0
ENSG00000284691	AC073111.5	protein_coding	13.5054	17.9268	11.3476	14.052	12.5592	19.2598
ENSG00000272822	AC073610.3	protein_coding	0.208101	0	0.368232	0.08536	0.1291	0.058542
ENSG00000144785	AC073896.1	protein_coding	0	1.22854	0.397085	0.404426	0.121824	0.155751
ENSG00000284791	AC078864.2	protein_coding	0	0	0.071185	0.14129	0.184379	0.235171
ENSG00000284849	AC079341.3	protein_coding	0.028974	0.03632	0	0.049712	0.114404	0.14597
ENSG00000180042	AC087498.1	protein_coding	0	0.011275	0	0.302149	0	0.17987
ENSG00000285253	AC090517.4	protein_coding	1.16998	0.551688	1.08567	1.44025	0.816568	1.76188
ENSG00000260170	AC090527.2	protein_coding	0.112675	0.22341	0.226225	0.131067	3.63107	0.241507
ENSG00000284906	AC091057.6	protein_coding	2.11482	2.73579	2.79975	2.83351	3.14694	2.84667
ENSG00000275674	AC091167.6	protein_coding	0.081554	0	0	0	0.14265	0
ENSG00000275740	AC091959.3	protein_coding	1.52972	0.211431	0.264403	0.003342	0.201681	0.172546
ENSG00000275038	AC091980.2	protein_coding	0	0	0.030714	0	0	0
ENSG00000273291	AC092042.3	protein_coding	0	0	0	0	0	0
ENSG00000266953	AC092073.1	protein_coding	1.42394	0.408828	0	0	0	0
ENSG00000198211	AC092143.1	protein_coding	0	0.288393	0.285728	0.296497	0	0
ENSG00000283201	AC092329.3	protein_coding	0	1.37405	0.112359	0	0.33946	0
ENSG00000273155	AC092587.1	protein_coding	0.961525	0.195009	0.581085	0.084468	1.6142	0.858587
ENSG00000249773	AC092647.5	protein_coding	0.181315	0.587027	0.734644	0	0.364986	0.556348
ENSG00000260643	AC092718.3	protein_coding	0	0.006462	0.477597	0	0.036059	0.026635
ENSG00000284512	AC092718.8	protein_coding	0	0.15198	0	0	0.111936	0.031234
ENSG00000233757	AC092835.1	protein_coding	0.944502	1.01039	0.880663	1.76604	1.03926	1.86398
ENSG00000267561	AC093155.3	protein_coding	0.111371	0.154527	0.076503	0.070236	0.11565	0.067568
ENSG00000170846	AC093323.1	protein_coding	5.64149	8.27765	5.74344	2.48406	4.76288	4.28269
ENSG00000285043	AC093512.2	protein_coding	2.80781	3.32159	2.14255	3.50837	2.09489	3.67107
ENSG00000260272	AC093525.2	protein_coding	0	0	0.419614	1.20461	0	1.55431
ENSG00000270249	AC093668.1	protein_coding	0	0	4.94643	2e-06	0	4.65046
ENSG00000284981	AC093668.3	protein_coding	46.0662	49.7852	58.3268	37.072	36.3744	72.2234
ENSG00000285458	AC093827.5	protein_coding	0.181547	0.413156	0.162974	0.054421	0.374407	0.225595
ENSG00000173366	AC097637.1	protein_coding	0.083691	0	0	0	0.106891	0.202821
ENSG00000285385	AC098582.1	protein_coding	0	0.860552	0	0	0	0
ENSG00000188897	AC099489.1	protein_coding	1.77695	1.48395	2.18545	1.26717	2.0056	1.66741
ENSG00000272772	AC104109.3	protein_coding	1.61153	1.50891	1.35627	0.886894	1.17417	1.40693
ENSG00000284931	AC104389.5	protein_coding	0	0.322699	0	0.507928	0	0.269473
ENSG00000283189	AC104452.1	protein_coding	1.14208	0	0.477351	0.552339	0	0
ENSG00000281028	AC104662.2	protein_coding	0.637624	3.03208	0	0	0	0
ENSG00000284552	AC106774.10	protein_coding	0	0	0	0.005766	0	0
ENSG00000284042	AC106774.5	protein_coding	0	0	0	0.048213	0	0
ENSG00000284234	AC106774.6	protein_coding	0	0	0	0.084373	0	0
ENSG00000284283	AC106774.7	protein_coding	0	0	0	0.012053	0	0
ENSG00000284439	AC106774.9	protein_coding	0	0	0	0.048213	0	0
ENSG00000258130	AC106782.1	protein_coding	0.4192	0.686539	0.161071	0.900491	0.654484	1.33547
ENSG00000260007	AC107871.1	protein_coding	0	0	0.00163	0	0	0
ENSG00000284956	AC107959.5	protein_coding	0	0	0	0	0.017188	0.059252
ENSG00000284773	AC114490.3	protein_coding	5.14623	5.23642	5.54876	4.90056	4.11686	3.98823
ENSG00000283782	AC116366.3	protein_coding	1.39283	4.49606	3.52065	4.20976	3.46192	1.36994
ENSG00000036549	AC118549.1	protein_coding	17.6299	17.1927	15.8956	11.0053	17.5571	20.6421
ENSG00000283761	AC118553.2	protein_coding	0.485398	0	0	0	0	0
ENSG00000263264	AC119396.1	protein_coding	76.416	91.3119	90.7064	171.225	84.55	130.169
ENSG00000284895	AC119676.1	protein_coding	0.285596	0.000522	0.001602	0.000253	0.000222	0.000205
ENSG00000233024	AC126755.2	protein_coding	17.6951	15.9685	15.8136	16.6282	14.9492	29.0572
ENSG00000216921	AC131097.2	protein_coding	0.005462	0.100859	0.192436	0.237578	0.083356	0.354281
ENSG00000283765	AC131160.1	protein_coding	1.74029	2.25136	2.79941	1.57871	1.64864	1.33399
ENSG00000258150	AC133555.3	protein_coding	0.233412	0.633402	0	0.665892	0	0
ENSG00000265118	AC134669.1	protein_coding	1.06483	0	0	0.705607	0.494781	0.474886
ENSG00000255439	AC135050.2	protein_coding	0	0	0.320951	0	0	0
ENSG00000256632	AC135586.2	protein_coding	0	0	0	0.023013	0	0
ENSG00000277666	AC136352.3	protein_coding	0	0	0	0.175959	0	0
ENSG00000275869	AC136612.1	protein_coding	0	0	0.052952	0	0	0
ENSG00000260342	AC138811.2	protein_coding	0	0	0	0	0	3.81639
ENSG00000183889	AC138969.1	protein_coding	8.70334	8.33935	5.30927	8.43478	10.5986	14.7081
ENSG00000262660	AC139530.2	protein_coding	0	0.334216	0	0	0	0
ENSG00000277400	AC145212.1	protein_coding	0.7144	0.292108	0.151308	2.70231	0.148019	0.424517
ENSG00000277475	AC213203.1	protein_coding	0	0	0	0	0	0
ENSG00000283988	AC233724.18	protein_coding	0	0	0	0	0	0
ENSG00000284356	AC233724.19	protein_coding	0	0	0	0	0	0
ENSG00000284465	AC233724.20	protein_coding	0	0	0	0	0	0
ENSG00000275063	AC233755.1	protein_coding	0	0	0.397938	0.063416	0	0.448315
ENSG00000277856	AC233755.2	protein_coding	0	0	0	0	0.1113	0
ENSG00000271254	AC240274.1	protein_coding	4.42886	2.74564	3.37955	3.11066	4.90185	5.50043
ENSG00000280778	AC243547.3	protein_coding	0	1.92012	2.99105	2.82267	0	0.931078
ENSG00000270339	AC243756.1	protein_coding	1.28449	0.423767	0.278791	0.294375	0.012608	0.926863
ENSG00000241489	AC244197.3	protein_coding	4.31115	1.80655	3.40484	2.41185	0	3.99195
ENSG00000267173	AC245748.1	protein_coding	0	0	0	0	0	0
ENSG00000060971	ACAA1	protein_coding	22.0147	22.7774	23.9841	31.6486	20.8081	24.9426
ENSG00000167315	ACAA2	protein_coding	5.30147	6.12162	4.21007	6.86345	4.73325	7.11639
ENSG00000278540	ACACA	protein_coding	12.8623	11.8917	11.2327	10.6761	11.0833	9.19746
ENSG00000076555	ACACB	protein_coding	7.67138	8.94449	8.40348	5.7397	8.02812	6.89293
ENSG00000111271	ACAD10	protein_coding	12.3728	10.1812	8.03472	11.2977	11.5711	12.3053
ENSG00000240303	ACAD11	protein_coding	14.3935	10.7615	13.0352	8.96989	11.0324	12.0381
ENSG00000151498	ACAD8	protein_coding	6.46429	6.17843	5.29668	8.68041	5.81144	9.04294
ENSG00000177646	ACAD9	protein_coding	11.8186	15.8226	13.4056	12.0514	12.7819	13.7108
ENSG00000117054	ACADM	protein_coding	2.4064	3.40967	3.09084	3.9591	2.47008	5.55142
ENSG00000122971	ACADS	protein_coding	4.86548	5.42419	4.95798	8.17899	5.78349	7.78421
ENSG00000196177	ACADSB	protein_coding	7.1318	7.49285	6.722	4.51127	5.46995	7.56211
ENSG00000072778	ACADVL	protein_coding	31.6692	32.4628	30.644	34.1767	35.4707	37.5162
ENSG00000157766	ACAN	protein_coding	0.020902	0.028758	0.009455	0.0131	0.011153	0.005798
ENSG00000072818	ACAP1	protein_coding	102.198	104.846	96.7721	152.381	89.6149	130.953
ENSG00000114331	ACAP2	protein_coding	30.6378	29.5001	25.4122	26.4354	27.2196	29.6425
ENSG00000131584	ACAP3	protein_coding	12.6653	11.9325	12.7687	23.5829	13.8674	15.4719
ENSG00000075239	ACAT1	protein_coding	7.04927	7.77262	7.22791	7.87582	6.4692	6.69924
ENSG00000120437	ACAT2	protein_coding	4.65428	4.70953	3.41984	5.02405	3.17844	4.63874
ENSG00000182827	ACBD3	protein_coding	12.3416	11.6259	13.0093	10.3509	12.1242	10.5793
ENSG00000181513	ACBD4	protein_coding	5.59792	9.06912	9.70958	9.50501	6.49402	11.5962
ENSG00000107897	ACBD5	protein_coding	13.1659	11.9472	13.5373	9.96763	13.4595	10.037
ENSG00000230124	ACBD6	protein_coding	13.3572	9.70838	10.2668	12.4818	9.08569	8.76775
ENSG00000176244	ACBD7	protein_coding	0.073744	0.063416	0	0	0.178163	0.042859
ENSG00000110455	ACCS	protein_coding	18.5616	9.86976	15.7332	8.12351	16.3596	19.4578
ENSG00000205126	ACCSL	protein_coding	0	0	0	0	0	0
ENSG00000102977	ACD	protein_coding	5.68318	6.05998	4.42695	10.683	4.09204	9.71625
ENSG00000159640	ACE	protein_coding	2.36765	2.64199	2.04799	2.47575	3.32404	1.74412
ENSG00000130234	ACE2	protein_coding	0	0	0	0	0	0
ENSG00000167769	ACER1	protein_coding	1.88459	1.40991	1.61931	1.09508	1.96426	1.39099
ENSG00000177076	ACER2	protein_coding	1.46914	2.22869	0.948465	1.79122	1.1268	1.97543
ENSG00000078124	ACER3	protein_coding	2.40305	2.41118	3.01102	2.52148	3.19151	1.95067
ENSG00000087085	ACHE	protein_coding	0	0	0	0	0	0.019168
ENSG00000100813	ACIN1	protein_coding	33.6643	36.6103	38.7723	25.9545	37.013	47.1573
ENSG00000144648	ACKR2	protein_coding	0.03298	0.056912	0	0.077898	0.112606	0.534308
ENSG00000144476	ACKR3	protein_coding	0.685182	1.19768	0.248953	1.12222	0.284842	1.58863
ENSG00000129048	ACKR4	protein_coding	0.331076	0.398721	0.551802	0.120306	0.396573	0.148012
ENSG00000131473	ACLY	protein_coding	21.4937	24.1419	18.8198	30.4885	23.006	30.7468
ENSG00000122729	ACO1	protein_coding	2.69007	2.92511	2.57386	1.66194	2.23087	2.29258
ENSG00000100412	ACO2	protein_coding	19.5215	21.8461	23.6763	23.0392	23.513	23.5356
ENSG00000102794	ACOD1	protein_coding	0	0.035403	0	0.026235	0	0.02617
ENSG00000184227	ACOT1	protein_coding	1.14817	0.760305	1.12592	0.675352	1.71738	1.03062
ENSG00000162390	ACOT11	protein_coding	0.287658	0.191307	0.057362	0.394833	0.362579	0.325948
ENSG00000172497	ACOT12	protein_coding	0.483555	0.089216	0.254364	0	0.112274	0.020258
ENSG00000112304	ACOT13	protein_coding	0.905838	1.08789	0.612242	1.06132	0.607843	1.36976
ENSG00000119673	ACOT2	protein_coding	9.40171	8.5554	6.56176	10.6844	6.50703	7.59375
ENSG00000177465	ACOT4	protein_coding	0.643463	0.970315	0.296036	0.449338	0.424935	0.690128
ENSG00000205669	ACOT6	protein_coding	0	0	0	0.105433	0	0
ENSG00000097021	ACOT7	protein_coding	2.72049	3.27832	1.94453	7.20736	2.27473	4.47999
ENSG00000101473	ACOT8	protein_coding	13.3451	14.6464	15.5477	13.347	12.5142	10.5583
ENSG00000123130	ACOT9	protein_coding	7.12694	7.71299	8.01133	8.29828	8.28408	6.87716
ENSG00000161533	ACOX1	protein_coding	7.30693	9.66735	8.06597	7.44214	7.06309	7.38179
ENSG00000168306	ACOX2	protein_coding	0.064717	0	0	0.023729	0.034514	0
ENSG00000087008	ACOX3	protein_coding	6.75358	5.694	6.26572	10.9521	5.98795	8.31988
ENSG00000153093	ACOXL	protein_coding	0	0	0.031509	0.072777	0	0.020877
ENSG00000143727	ACP1	protein_coding	44.8369	36.9336	38.8086	26.6621	39.5918	32.4834
ENSG00000134575	ACP2	protein_coding	4.58809	3.62902	3.01616	7.7201	5.39497	5.9735
ENSG00000142513	ACP4	protein_coding	0.804907	0.471101	0.881041	0.297427	0.477087	0.203139
ENSG00000102575	ACP5	protein_coding	6.89379	8.02948	5.58189	17.993	6.59469	12.0552
ENSG00000162836	ACP6	protein_coding	4.30145	3.7078	4.09223	2.96963	2.29633	6.13654
ENSG00000183760	ACP7	protein_coding	0.030787	0.02836	0	0	0	0
ENSG00000014257	ACPP	protein_coding	0.076535	0.304882	0.505808	3.2337	1.05448	0.695951
ENSG00000111644	ACRBP	protein_coding	0.651831	0.84461	0.520078	1.31677	0.719824	1.18319
ENSG00000134940	ACRV1	protein_coding	0	0	0	0	0	0.050802
ENSG00000103740	ACSBG1	protein_coding	0.151315	0.163828	0.119815	0.199043	0.108378	0.135162
ENSG00000130377	ACSBG2	protein_coding	0	0	0	0	0	0
ENSG00000167107	ACSF2	protein_coding	3.7366	2.3827	2.32499	5.25618	2.29026	3.10873
ENSG00000176715	ACSF3	protein_coding	21.9226	22.5514	29.4292	32.8986	23.0867	28.8955
ENSG00000151726	ACSL1	protein_coding	5.68073	4.70163	9.22906	11.1457	9.12357	5.39015
ENSG00000123983	ACSL3	protein_coding	9.62043	8.53681	7.30193	7.18568	9.04542	10.6826
ENSG00000068366	ACSL4	protein_coding	11.2385	9.64442	8.89433	12.1822	12.3004	11.3452
ENSG00000197142	ACSL5	protein_coding	12.4799	12.3782	7.89549	17.4263	13.0129	18.5913
ENSG00000164398	ACSL6	protein_coding	6.53001	7.24975	4.81506	6.06007	4.26172	7.94123
ENSG00000166743	ACSM1	protein_coding	0.10975	0.215746	0.123875	0.095069	0.102528	0.128908
ENSG00000066813	ACSM2B	protein_coding	0	0	0	0.009884	0.088193	0
ENSG00000005187	ACSM3	protein_coding	1.74726	1.4578	1.04397	0.744139	1.36341	1.0022
ENSG00000183549	ACSM5	protein_coding	0	0	0	0	0	0.019855
ENSG00000154930	ACSS1	protein_coding	17.1848	20.9793	15.8267	27.9671	17.2014	23.3937
ENSG00000131069	ACSS2	protein_coding	6.24458	6.09691	5.05288	5.66248	5.68138	8.90623
ENSG00000143632	ACTA1	protein_coding	0	0.03526	0.035963	0	0.121954	0.041173
ENSG00000107796	ACTA2	protein_coding	0.836751	2.07973	2.25237	4.70735	1.8226	3.82896
ENSG00000075624	ACTB	protein_coding	838.082	784.057	822.025	2817.1	789.932	1637.91
ENSG00000184009	ACTG1	protein_coding	211.076	284.564	232.082	554.281	257.242	322.532
ENSG00000163017	ACTG2	protein_coding	0.07085	0.118709	0.022512	0.027891	0.032254	0.096079
ENSG00000182584	ACTL10	protein_coding	0.683417	0.920521	0.288005	2.29765	0.22946	0.69548
ENSG00000136518	ACTL6A	protein_coding	5.9178	5.90245	5.45932	5.2073	4.95224	7.86289
ENSG00000077080	ACTL6B	protein_coding	0	0	0	0.024596	0.017386	0
ENSG00000187003	ACTL7A	protein_coding	0.130507	0	0	0.038532	0.04456	0
ENSG00000148156	ACTL7B	protein_coding	0.372909	0.176318	0.035946	0.036216	0.139638	0.169255
ENSG00000072110	ACTN1	protein_coding	25.5594	34.1709	32.5181	24.4766	28.867	30.2212
ENSG00000077522	ACTN2	protein_coding	0	0	0	0.011281	0	0
ENSG00000248746	ACTN3	protein_coding	0	0.027275	0.036931	0.184435	0.107782	0.14419
ENSG00000130402	ACTN4	protein_coding	17.9935	20.7955	18.2897	31.9276	24.5746	26.6373
ENSG00000131966	ACTR10	protein_coding	9.48708	8.4949	6.92277	7.72881	6.62229	10.3081
ENSG00000138107	ACTR1A	protein_coding	12.6548	14.1969	11.4995	24.8258	13.2548	19.5711
ENSG00000115073	ACTR1B	protein_coding	31.1932	32.5455	31.6679	40.1988	30.1013	32.6331
ENSG00000138071	ACTR2	protein_coding	114.277	103.554	83.7446	109.24	99.0588	104.917
ENSG00000115091	ACTR3	protein_coding	35.3876	36.5314	36.3381	37.5955	35.9746	42.1318
ENSG00000133627	ACTR3B	protein_coding	4.77567	3.69242	5.15454	4.66999	4.17235	4.49945
ENSG00000106526	ACTR3C	protein_coding	4.2455	4.47091	5.97895	5.10025	6.17986	8.75561
ENSG00000101442	ACTR5	protein_coding	8.7668	9.55688	8.31	9.12694	7.35105	7.66849
ENSG00000075089	ACTR6	protein_coding	9.61003	10.6341	9.0641	5.7709	7.07906	7.6472
ENSG00000113812	ACTR8	protein_coding	5.78383	5.58664	4.84687	5.80864	5.07165	6.49596
ENSG00000184378	ACTRT3	protein_coding	0	0	0	0.057423	0	0.08118
ENSG00000115170	ACVR1	protein_coding	8.95356	14.257	7.62452	18.6096	11.5838	19.8393
ENSG00000135503	ACVR1B	protein_coding	4.35938	5.27301	6.76345	4.91885	5.55829	6.42193
ENSG00000123612	ACVR1C	protein_coding	3.84441	3.57506	4.01483	0.857355	3.41137	2.67757
ENSG00000121989	ACVR2A	protein_coding	4.07285	4.06326	2.64932	1.88488	2.45817	4.28439
ENSG00000114739	ACVR2B	protein_coding	2.96192	4.54807	2.8284	4.58589	4.38405	6.91558
ENSG00000139567	ACVRL1	protein_coding	0	0.040823	0	0.095639	0.016155	0
ENSG00000243989	ACY1	protein_coding	1.75842	1.59246	1.51646	2.46094	1.73663	2.15911
ENSG00000132744	ACY3	protein_coding	0.073742	0.129409	0.131563	0.690237	0.535891	0.309993
ENSG00000119640	ACYP1	protein_coding	4.30452	4.42305	7.02735	11.2914	7.17668	13.9411
ENSG00000170634	ACYP2	protein_coding	6.85775	10.0116	12.413	14.5603	9.89944	6.80115
ENSG00000196839	ADA	protein_coding	11.0464	9.36091	7.62282	21.8871	18.4162	17.5299
ENSG00000093072	ADA2	protein_coding	23.6771	29.5475	23.6698	61.3891	30.8121	42.25
ENSG00000164113	ADAD1	protein_coding	0	0	0	0	0	0.029241
ENSG00000140955	ADAD2	protein_coding	0	0.025588	0	0	0	0
ENSG00000168803	ADAL	protein_coding	1.33542	0.876077	1.17667	1.46982	1.49314	2.28597
ENSG00000137845	ADAM10	protein_coding	24.7247	21.7629	20.3991	16.8697	30.8989	23.8323
ENSG00000073670	ADAM11	protein_coding	0.132339	0.117666	0.216966	0.144329	0.247642	0.268358
ENSG00000148848	ADAM12	protein_coding	1.40269	1.76117	0.483482	0.664831	0.566756	1.83473
ENSG00000143537	ADAM15	protein_coding	8.43838	7.99298	6.04087	14.4295	6.87491	7.63755
ENSG00000151694	ADAM17	protein_coding	13.1027	12.7695	12.7346	11.5278	15.1701	14.8427
ENSG00000135074	ADAM19	protein_coding	19.6672	19.0865	18.3107	44.0864	21.0131	34.8666
ENSG00000134007	ADAM20	protein_coding	0.810003	0.372554	0.563499	0.520428	1.03987	1.97334
ENSG00000139985	ADAM21	protein_coding	0	0	0	0.021658	0	0.034327
ENSG00000008277	ADAM22	protein_coding	1.7808	2.43184	1.86878	0.977932	2.32865	1.33042
ENSG00000114948	ADAM23	protein_coding	2.17565	2.31674	3.46136	0.144873	1.39482	1.68118
ENSG00000042980	ADAM28	protein_coding	0.443578	0.619693	0.426973	1.77683	1.44599	0.799993
ENSG00000168594	ADAM29	protein_coding	0	0	0.019073	0	0	0.033467
ENSG00000134249	ADAM30	protein_coding	0.032902	0.042583	0.021742	0	0	0
ENSG00000197140	ADAM32	protein_coding	0	0	0.115032	0.011737	0.08823	0.160194
ENSG00000149451	ADAM33	protein_coding	0.026425	0	0.01006	0.051677	0	0
ENSG00000151651	ADAM8	protein_coding	31.0664	30.2817	24.3355	62.3681	31.2369	40.2991
ENSG00000168615	ADAM9	protein_coding	3.24956	3.15986	3.28229	2.3361	5.33072	2.26491
ENSG00000134028	ADAMDEC1	protein_coding	0.04152	0	0	0	0	0.024131
ENSG00000154734	ADAMTS1	protein_coding	0.300236	0.162565	0.058885	0.069393	0.012825	0.114404
ENSG00000142303	ADAMTS10	protein_coding	7.27707	7.56454	10.3052	6.50248	7.16089	3.2664
ENSG00000151388	ADAMTS12	protein_coding	0	0	0	0	0	0
ENSG00000160323	ADAMTS13	protein_coding	0.572335	0.42467	0.513818	1.15674	0.737231	1.18486
ENSG00000138316	ADAMTS14	protein_coding	0.018132	0	0	0.005008	0.037399	0.032588
ENSG00000166106	ADAMTS15	protein_coding	0	0	0.015074	0	0.040304	0.009987
ENSG00000145536	ADAMTS16	protein_coding	0	0.009805	0	0	0	0.00671
ENSG00000140470	ADAMTS17	protein_coding	3.8241	3.05404	1.96416	2.32608	1.74073	2.23919
ENSG00000140873	ADAMTS18	protein_coding	0	0	0.009471	0	0	0
ENSG00000087116	ADAMTS2	protein_coding	0	0	0	0	0	0
ENSG00000173157	ADAMTS20	protein_coding	0.018798	0	0	0	0	0
ENSG00000156140	ADAMTS3	protein_coding	0	0	0	0	0.007949	0
ENSG00000158859	ADAMTS4	protein_coding	0.136701	0.147417	0.164108	0.285076	0.246373	0.410333
ENSG00000154736	ADAMTS5	protein_coding	0.010765	0.009196	0.018886	0	0	0
ENSG00000049192	ADAMTS6	protein_coding	1.03017	0.621624	0.44333	0.201925	0.856277	0.609886
ENSG00000136378	ADAMTS7	protein_coding	0	0	0	0	0	0.010212
ENSG00000134917	ADAMTS8	protein_coding	0	0	0.021326	0.009228	0.011969	0.014129
ENSG00000197859	ADAMTSL2	protein_coding	0.225962	0.170837	0.577311	0.106252	0.202748	0.115338
ENSG00000156218	ADAMTSL3	protein_coding	0	0	0	0	0	0
ENSG00000143382	ADAMTSL4	protein_coding	1.31004	1.07595	0.963863	8.07152	1.68325	1.48708
ENSG00000185761	ADAMTSL5	protein_coding	1.53424	1.475	0.834761	2.71439	1.54939	2.53292
ENSG00000105963	ADAP1	protein_coding	4.31129	4.30642	4.18912	19.0493	6.78657	5.23933
ENSG00000184060	ADAP2	protein_coding	0.504579	0.550699	0.536412	3.13915	1.23483	0.845106
ENSG00000160710	ADAR	protein_coding	79.111	84.0643	82.1327	84.0272	86.7509	107.582
ENSG00000197381	ADARB1	protein_coding	8.4751	10.4198	6.52069	6.56632	7.35344	7.58236
ENSG00000185736	ADARB2	protein_coding	0.403203	0.128557	0.029721	0.620866	0.141912	0.303469
ENSG00000065457	ADAT1	protein_coding	27.8644	34.9921	30.9627	34.1594	32.5206	30.5684
ENSG00000189007	ADAT2	protein_coding	3.35908	3.69604	4.02714	2.77487	4.16563	4.28628
ENSG00000213638	ADAT3	protein_coding	1.40709	1.91734	1.8378	9.74822	3.57826	5.59212
ENSG00000063761	ADCK1	protein_coding	2.77845	2.39685	1.60365	3.72877	2.65646	3.03133
ENSG00000133597	ADCK2	protein_coding	8.82675	8.34271	6.49375	12.4805	7.48194	8.84388
ENSG00000173137	ADCK5	protein_coding	6.20307	6.6921	4.97696	9.0693	5.30886	7.80485
ENSG00000164742	ADCY1	protein_coding	0.023392	0.011953	0.027017	0.022837	0.021067	0
ENSG00000143199	ADCY10	protein_coding	0.112091	0.082464	0.075743	0.026748	0.062959	0.063117
ENSG00000138031	ADCY3	protein_coding	7.7318	9.24972	7.28039	14.7409	13.1386	8.67503
ENSG00000129467	ADCY4	protein_coding	1.37877	1.60319	1.88644	1.86105	1.51668	1.70911
ENSG00000173175	ADCY5	protein_coding	0	0.033864	0	0.037148	0	0.034538
ENSG00000174233	ADCY6	protein_coding	0.085982	0.090701	0.026415	0.238953	0.041613	0.017531
ENSG00000121281	ADCY7	protein_coding	44.711	38.0552	42.6434	83.1529	44.8247	59.3106
ENSG00000162104	ADCY9	protein_coding	4.1612	3.00691	3.50863	3.81818	4.77567	3.92665
ENSG00000141433	ADCYAP1	protein_coding	0	0	0	0	0	0
ENSG00000078549	ADCYAP1R1	protein_coding	0	0	0	0.008755	0	0
ENSG00000087274	ADD1	protein_coding	48.4344	46.7897	46.1248	50.081	45.5989	43.4827
ENSG00000075340	ADD2	protein_coding	1.13249	1.87322	1.57916	1.99927	1.63275	1.80007
ENSG00000148700	ADD3	protein_coding	76.4855	84.832	76.8549	60.4641	80.5713	86.4138
ENSG00000020181	ADGRA2	protein_coding	0.162271	0.173666	0.221996	0.366171	0.164255	0.143684
ENSG00000152990	ADGRA3	protein_coding	1.52274	1.28166	3.24423	0.50852	1.60393	0.886183
ENSG00000181790	ADGRB1	protein_coding	0.702522	0.547333	0.921972	0.636447	0.599212	1.13705
ENSG00000121753	ADGRB2	protein_coding	0.439613	0.19373	0.244695	0.252472	0.120875	0.405039
ENSG00000135298	ADGRB3	protein_coding	0	0.027526	0	0	0.047225	0.041361
ENSG00000111452	ADGRD1	protein_coding	0.244821	0.234942	0.324212	0.63728	0.261763	0.121273
ENSG00000174837	ADGRE1	protein_coding	4.86693	2.9767	2.2656	12.7166	6.56426	6.07207
ENSG00000127507	ADGRE2	protein_coding	1.89083	2.25742	1.3289	18.5438	10.1331	8.59523
ENSG00000131355	ADGRE3	protein_coding	0.128587	0.421596	0.075444	1.91929	0.740598	0.646731
ENSG00000123146	ADGRE5	protein_coding	75.3219	72.4065	68.4408	183.508	140.07	118.989
ENSG00000164393	ADGRF2	protein_coding	0.062579	0	0.009924	0	0	0.01862
ENSG00000173567	ADGRF3	protein_coding	0.475498	0.272208	0.244504	0.786121	0.909489	0.725889
ENSG00000153294	ADGRF4	protein_coding	0.018254	0	0	0	0	0
ENSG00000205336	ADGRG1	protein_coding	22.4283	9.61105	9.32878	7.322	33.7908	13.602
ENSG00000173698	ADGRG2	protein_coding	0.012064	0.017513	0	0	0	0
ENSG00000182885	ADGRG3	protein_coding	0.572339	0.625583	0.778783	0.661269	1.0513	0.226229
ENSG00000159618	ADGRG5	protein_coding	3.14858	2.17843	1.36228	3.63605	6.05416	6.03032
ENSG00000112414	ADGRG6	protein_coding	0.081958	0.153123	0.131925	0.758207	0.240422	0.123305
ENSG00000072071	ADGRL1	protein_coding	7.24866	7.30204	11.0262	7.53887	7.51527	9.54948
ENSG00000117114	ADGRL2	protein_coding	0	0	0	0.002614	0	0
ENSG00000150471	ADGRL3	protein_coding	0	0	0	0	0.010045	0
ENSG00000164199	ADGRV1	protein_coding	0.24425	0.123795	0.149014	0.252382	0.331731	0.377195
ENSG00000198099	ADH4	protein_coding	0	0	0	0	0	0
ENSG00000197894	ADH5	protein_coding	18.1125	15.2932	15.1424	14.1303	14.362	15.3006
ENSG00000147576	ADHFE1	protein_coding	3.96149	5.48981	4.92435	3.7604	3.75871	4.51488
ENSG00000182551	ADI1	protein_coding	12.6021	14.305	21.7312	13.1987	14.8758	8.66594
ENSG00000182035	ADIG	protein_coding	0	0	0.220031	0	0	0
ENSG00000159346	ADIPOR1	protein_coding	30.513	31.8683	32.7781	26.9638	35.4434	23.1595
ENSG00000006831	ADIPOR2	protein_coding	7.76253	8.23786	5.39527	9.6485	9.11224	9.33679
ENSG00000148671	ADIRF	protein_coding	0.121226	0.362332	0	0.47606	0.128374	0.174017
ENSG00000156110	ADK	protein_coding	18.0561	17.7671	14.0208	14.6607	15.9144	16.5466
ENSG00000148926	ADM	protein_coding	0.387028	0.283817	0.285289	3.51916	1.10328	0.377671
ENSG00000128165	ADM2	protein_coding	0.249878	0.273633	0.119128	0.453559	0.337483	0.760402
ENSG00000224420	ADM5	protein_coding	2.38956	0.225144	1.531	2.49668	1.66122	2.48007
ENSG00000101126	ADNP	protein_coding	13.9818	8.90052	37.428	7.03332	18.0076	12.5207
ENSG00000101544	ADNP2	protein_coding	26.2186	25.4936	31.6927	15.6441	29.1324	19.0738
ENSG00000181915	ADO	protein_coding	10.2841	9.73045	9.60914	7.48546	8.12812	7.82584
ENSG00000163485	ADORA1	protein_coding	0.066796	0.024689	0	0.150194	0	0.066465
ENSG00000128271	ADORA2A	protein_coding	11.4751	10.4765	9.37251	23.9772	8.59043	20.4627
ENSG00000170425	ADORA2B	protein_coding	0.14613	0.212674	0	0.589856	0.172667	0.096519
ENSG00000282608	ADORA3	protein_coding	0.12902	0	0	0	0.054627	0
ENSG00000159322	ADPGK	protein_coding	25.0918	30.2014	26.0287	30.6372	28.3611	33.6046
ENSG00000144843	ADPRH	protein_coding	0.716657	0.55333	0.356676	1.1925	0.50413	1.16767
ENSG00000153531	ADPRHL1	protein_coding	0.10539	0.064587	0.042022	0.163354	0.064265	0.091084
ENSG00000116863	ADPRHL2	protein_coding	11.9112	12.7368	10.8746	11.1353	10.8013	10.504
ENSG00000170222	ADPRM	protein_coding	28.6897	19.2096	30.7746	11.4858	25.1798	26.1497
ENSG00000170214	ADRA1B	protein_coding	0	0	0	0	0.032522	0
ENSG00000171873	ADRA1D	protein_coding	0	0	0	0	0	0
ENSG00000150594	ADRA2A	protein_coding	0.026032	0.168457	0.022835	0	0.035553	0
ENSG00000274286	ADRA2B	protein_coding	0.029595	0.099811	0.064351	0.113676	0.068528	0.050423
ENSG00000043591	ADRB1	protein_coding	0	0.092873	0.059948	0.075262	0.070003	0.059578
ENSG00000169252	ADRB2	protein_coding	5.9343	3.5368	2.08653	3.91056	8.55695	4.58067
ENSG00000130706	ADRM1	protein_coding	17.4799	19.0664	16.8459	33.8662	18.0565	24.3979
ENSG00000239900	ADSL	protein_coding	13.9511	16.6234	16.6996	17.9441	15.6973	13.3136
ENSG00000035687	ADSS	protein_coding	27.8458	23.9426	26.3702	17.4123	26.1544	21.2014
ENSG00000185100	ADSSL1	protein_coding	0.60529	0.617497	0.606263	0.721924	0.491453	0.812399
ENSG00000111863	ADTRP	protein_coding	7.15054	6.57018	7.01843	4.86826	5.43225	6.77531
ENSG00000106624	AEBP1	protein_coding	2.59789	3.15499	2.44784	2.93882	3.02886	4.80227
ENSG00000139154	AEBP2	protein_coding	8.90453	12.4714	16.6772	13.8503	9.22322	23.3489
ENSG00000181026	AEN	protein_coding	21.9355	22.5268	20.6391	26.8581	25.0914	22.8151
ENSG00000104964	AES	protein_coding	156.134	196.043	252.35	285.167	195.424	261.321
ENSG00000196526	AFAP1	protein_coding	4.08183	2.74207	4.87853	2.64513	3.43243	3.75055
ENSG00000157510	AFAP1L1	protein_coding	0	0.056386	0	0.040518	0.015832	0
ENSG00000169129	AFAP1L2	protein_coding	0.231682	0.665177	0.150133	0.394034	0.291955	0.477737
ENSG00000130396	AFDN	protein_coding	8.35291	7.16651	12.8072	4.84274	8.72275	7.88711
ENSG00000172493	AFF1	protein_coding	28.9148	15.9998	15.2816	14.2556	20.4802	31.4532
ENSG00000155966	AFF2	protein_coding	0.344075	0.4586	0.480362	0.255601	0.222766	0.236056
ENSG00000144218	AFF3	protein_coding	4.37394	6.41159	5.62309	11.5229	8.41264	10.3754
ENSG00000072364	AFF4	protein_coding	37.9784	34.3565	38.5169	18.6682	39.8677	27.2462
ENSG00000135537	AFG1L	protein_coding	1.4268	1.52218	1.3547	1.28958	1.39776	1.17029
ENSG00000141385	AFG3L2	protein_coding	12.098	11.111	12.2122	10.9137	12.6906	12.241
ENSG00000183077	AFMID	protein_coding	1.24443	0.393057	1.32023	3.74265	0.921684	1.57431
ENSG00000119844	AFTPH	protein_coding	18.5005	15.6298	5.70503	10.4823	19.1091	5.58639
ENSG00000038002	AGA	protein_coding	5.64499	6.58374	6.13785	6.7146	5.02593	5.74954
ENSG00000157985	AGAP1	protein_coding	4.79278	2.48284	2.91679	1.50929	3.31129	2.51323
ENSG00000135439	AGAP2	protein_coding	14.3848	17.3752	12.4994	26.4833	11.7579	20.2658
ENSG00000133612	AGAP3	protein_coding	8.06638	5.39379	3.95225	11.1222	5.27519	7.6024
ENSG00000188234	AGAP4	protein_coding	5.39859	5.79815	7.35696	4.90604	5.0932	6.61027
ENSG00000172650	AGAP5	protein_coding	2.20981	3.21801	2.1023	3.82881	2.74919	3.52984
ENSG00000204149	AGAP6	protein_coding	8.61018	9.26947	10.6355	11.6397	10.5021	13.2815
ENSG00000204172	AGAP9	protein_coding	7.46694	6.44231	7.49536	7.7092	3.06576	11.1937
ENSG00000165923	AGBL2	protein_coding	0.551809	0.391063	0.508484	0.6829	0.488908	2.09461
ENSG00000146856	AGBL3	protein_coding	0.949737	0.533993	2.43378	0.733872	0.419367	1.29873
ENSG00000186094	AGBL4	protein_coding	0.066162	0	0.021716	0.029042	0.016905	0.092444
ENSG00000084693	AGBL5	protein_coding	5.72016	4.7873	6.15125	4.47515	4.86323	3.52594
ENSG00000204305	AGER	protein_coding	7.67302	7.98024	7.77538	15.0821	6.56666	13.2625
ENSG00000173744	AGFG1	protein_coding	15.0433	17.1097	15.82	16.24	21.3483	17.2701
ENSG00000106351	AGFG2	protein_coding	4.22534	6.08363	4.12704	13.4862	3.84434	9.88565
ENSG00000164252	AGGF1	protein_coding	13.7824	10.3558	12.7792	9.11567	11.002	11.1628
ENSG00000006530	AGK	protein_coding	6.87082	7.52667	6.94847	7.67001	7.2233	9.19109
ENSG00000162688	AGL	protein_coding	7.50613	6.91582	6.24259	5.43225	6.30473	8.6454
ENSG00000116771	AGMAT	protein_coding	2.81802	4.03741	3.019	10.1249	2.9889	6.3624
ENSG00000092847	AGO1	protein_coding	9.53957	9.51551	10.4029	8.97851	9.39571	8.97701
ENSG00000123908	AGO2	protein_coding	22.8604	25.5437	28.1308	19.99	22.8132	20.3062
ENSG00000126070	AGO3	protein_coding	11.743	12.4575	13.4347	9.41188	12.2232	10.9202
ENSG00000134698	AGO4	protein_coding	11.1813	10.9604	7.61705	11.6025	10.382	10.9258
ENSG00000204310	AGPAT1	protein_coding	8.70816	11.4573	9.48635	16.9677	9.31371	13.4852
ENSG00000169692	AGPAT2	protein_coding	4.38328	3.215	3.17575	10.7098	4.33678	5.62151
ENSG00000160216	AGPAT3	protein_coding	17.6884	20.2988	21.5426	37.3729	22.5895	25.4442
ENSG00000026652	AGPAT4	protein_coding	9.01995	6.20266	6.41537	4.15925	7.77916	6.65476
ENSG00000155189	AGPAT5	protein_coding	4.99779	4.61372	3.8546	5.04896	5.44952	5.38069
ENSG00000018510	AGPS	protein_coding	9.50963	8.82923	8.83759	6.34023	8.49535	8.94327
ENSG00000188157	AGRN	protein_coding	1.13547	1.35227	1.69489	2.61053	2.04916	2.5885
ENSG00000159723	AGRP	protein_coding	0.124238	0	0	0	0.088994	0
ENSG00000135049	AGTPBP1	protein_coding	31.7747	27.1191	29.278	17.4608	31.0174	22.1469
ENSG00000177674	AGTRAP	protein_coding	5.05477	9.71961	6.50475	22.2424	9.48685	9.28109
ENSG00000153207	AHCTF1	protein_coding	34.3068	31.1249	40.2297	23.4614	34.3017	29.1227
ENSG00000101444	AHCY	protein_coding	6.65212	7.93111	4.41288	13.4267	8.68714	9.15302
ENSG00000168710	AHCYL1	protein_coding	6.74634	7.30122	5.07922	12.3018	5.7817	12.7711
ENSG00000158467	AHCYL2	protein_coding	4.26588	7.01857	6.54978	5.63838	5.23803	8.4757
ENSG00000126705	AHDC1	protein_coding	4.73523	5.37475	5.02087	7.28031	5.33401	7.87597
ENSG00000135541	AHI1	protein_coding	6.25092	5.79082	7.21597	3.58865	9.6702	6.0422
ENSG00000124942	AHNAK	protein_coding	251.903	202.239	196.425	209.769	239.956	198.148
ENSG00000185567	AHNAK2	protein_coding	0.058694	0.054981	0.032793	0.040976	0.028773	0.023186
ENSG00000106546	AHR	protein_coding	17.4207	17.3499	16.4303	24.5533	18.0975	17.6815
ENSG00000063438	AHRR	protein_coding	0.205647	0.10243	0.210438	0.330399	0.392603	0.182871
ENSG00000100591	AHSA1	protein_coding	8.208	12.2471	9.19698	13.9525	11.0136	18.0288
ENSG00000169877	AHSP	protein_coding	0	0	0	0	0	0.207966
ENSG00000111732	AICDA	protein_coding	0	0	0	0	0	0
ENSG00000186063	AIDA	protein_coding	15.5976	16.8257	13.7844	14.5128	13.9445	15.6171
ENSG00000204472	AIF1	protein_coding	11.7042	10.9027	9.64129	46.2959	21.4406	22.9021
ENSG00000126878	AIF1L	protein_coding	0	0.047861	0.084665	0.049132	0.167222	0.016119
ENSG00000156709	AIFM1	protein_coding	5.44717	5.50278	4.96335	6.22529	4.96946	7.5972
ENSG00000042286	AIFM2	protein_coding	1.18135	1.20642	1.60045	1.57177	1.1946	2.03744
ENSG00000183773	AIFM3	protein_coding	0.224493	0.310006	0.22609	3.40966	0.517895	0.565359
ENSG00000146416	AIG1	protein_coding	3.79996	6.94273	4.14201	3.99742	3.83376	4.59025
ENSG00000163568	AIM2	protein_coding	0.769678	0.657215	0.45926	2.59621	0.620027	2.52564
ENSG00000164022	AIMP1	protein_coding	15.6641	16.4621	16.6205	10.3481	14.9913	14.9089
ENSG00000106305	AIMP2	protein_coding	4.26906	4.1627	3.64112	7.89468	4.11779	4.19433
ENSG00000110711	AIP	protein_coding	69.4589	67.3132	58.2499	80.2311	57.5894	60.5392
ENSG00000129221	AIPL1	protein_coding	0	0	0	0	0	0
ENSG00000160224	AIRE	protein_coding	0.212026	0.32485	0.09025	0.477904	0.044603	0.240116
ENSG00000196581	AJAP1	protein_coding	0.252203	0.307919	0.136376	0.080532	0.378427	0.223298
ENSG00000232434	AJM1	protein_coding	2.58756	1.9427	2.71356	4.87971	3.05246	2.11375
ENSG00000129474	AJUBA	protein_coding	0.349122	0.32282	0.154788	0.453126	0.232425	0.640966
ENSG00000106992	AK1	protein_coding	3.09464	0.012573	0.093303	1.78059	3.2262	2.91064
ENSG00000004455	AK2	protein_coding	17.7787	19.0397	15.5684	22.1347	15.1439	21.4913
ENSG00000147853	AK3	protein_coding	12.0774	9.57813	14.3162	8.55937	14.2876	11.9866
ENSG00000162433	AK4	protein_coding	0.041746	0.05399	0.01222	0.016452	0.052084	0.072693
ENSG00000154027	AK5	protein_coding	4.76146	8.83394	8.17126	4.59296	5.19783	10.7039
ENSG00000085231	AK6	protein_coding	2.00296	2.86605	2.57692	1.84788	2.35592	4.56531
ENSG00000140057	AK7	protein_coding	0	0	0	0	0.059378	0.042924
ENSG00000165695	AK8	protein_coding	0	0.020734	0	0.018545	0	0
ENSG00000155085	AK9	protein_coding	2.39394	3.1954	2.90032	1.6057	2.39652	3.90062
ENSG00000121057	AKAP1	protein_coding	8.09335	7.92281	8.25694	7.29584	9.55205	15.3514
ENSG00000108599	AKAP10	protein_coding	15.2692	15.4993	14.4104	9.1615	14.0173	17.6935
ENSG00000023516	AKAP11	protein_coding	23.1596	21.5417	21.6032	17.9737	21.6686	23.8836
ENSG00000131016	AKAP12	protein_coding	0.131111	0.077188	0.100742	0.060739	0.099375	0.020159
ENSG00000170776	AKAP13	protein_coding	75.7253	70.8002	83.1007	80.3165	95.9666	88.8696
ENSG00000186471	AKAP14	protein_coding	0.034727	0	0	0	0.083225	0
ENSG00000197976	AKAP17A	protein_coding	40.618	40.2291	52.2527	55.5808	43.3512	51.3445
ENSG00000241978	AKAP2	protein_coding	4.91842	5.89541	7.73614	6.12192	6.14729	7.54915
ENSG00000111254	AKAP3	protein_coding	0.131664	0.243	0.038417	0.190901	0.197821	0.336964
ENSG00000179841	AKAP5	protein_coding	0.426506	0.201827	0.264998	0.212456	0.256244	0.140457
ENSG00000151320	AKAP6	protein_coding	0.81657	1.25179	1.40327	0.106022	1.28753	0.420071
ENSG00000118507	AKAP7	protein_coding	3.42252	5.46119	5.55897	4.61524	5.46084	6.54659
ENSG00000105127	AKAP8	protein_coding	24.8208	26.3383	28.4072	19.7379	28.619	21.0829
ENSG00000011243	AKAP8L	protein_coding	23.1476	25.0582	24.909	26.4227	25.6899	29.606
ENSG00000127914	AKAP9	protein_coding	30.1732	29.3741	37.1839	14.8662	32.9813	33.6571
ENSG00000166452	AKIP1	protein_coding	1.28682	2.30959	1.3498	4.17092	2.26772	3.20104
ENSG00000174574	AKIRIN1	protein_coding	26.044	26.0576	32.9763	39.8902	40.086	26.3627
ENSG00000135334	AKIRIN2	protein_coding	24.2596	23.1076	19.1094	32.5343	30.0989	25.3555
ENSG00000106948	AKNA	protein_coding	131.619	117.497	123.262	145.055	158.719	134.656
ENSG00000117448	AKR1A1	protein_coding	13.8674	11.9774	7.86062	23.2985	11.514	15.6918
ENSG00000085662	AKR1B1	protein_coding	23.0558	24.3575	19.9328	24.0432	17.7951	23.9063
ENSG00000227471	AKR1B15	protein_coding	0	0	0	0	0.016134	0
ENSG00000187134	AKR1C1	protein_coding	1.20256	0.942632	0.580606	0.466995	1.0184	1.58678
ENSG00000151632	AKR1C2	protein_coding	0.111522	0.209229	0.029688	0.024216	0.060538	0.114647
ENSG00000196139	AKR1C3	protein_coding	1.81778	1.04475	0.902403	1.15887	1.02861	1.46544
ENSG00000198610	AKR1C4	protein_coding	0	0	0.038172	0.115462	0	0.031687
ENSG00000165568	AKR1E2	protein_coding	4.67798	5.43201	2.45449	3.03754	4.81666	3.56971
ENSG00000053371	AKR7A2	protein_coding	13.1831	12.0425	7.62788	16.5925	7.12505	11.8545
ENSG00000162482	AKR7A3	protein_coding	0.983119	1.28838	1.37569	1.14957	0.845855	0.962773
ENSG00000142208	AKT1	protein_coding	26.6178	19.6713	18.0196	24.3934	28.0709	16.7337
ENSG00000204673	AKT1S1	protein_coding	5.62694	6.46901	5.51822	6.24323	5.85617	5.66112
ENSG00000105221	AKT2	protein_coding	38.5564	48.2563	46.2518	64.0143	53.6035	49.3481
ENSG00000117020	AKT3	protein_coding	26.0532	25.4507	23.0902	9.31352	21.5791	21.8527
ENSG00000166971	AKTIP	protein_coding	18.4911	22.6596	15.6226	19.6655	13.9481	18.831
ENSG00000111780	AL021546.1	protein_coding	0	0	0	0	0.720842	0
ENSG00000276302	AL021997.3	protein_coding	0	0.861338	1.15247	0	0.249983	0
ENSG00000285025	AL022312.1	protein_coding	28.5099	22.7832	26.0497	18.0278	20.986	13.7207
ENSG00000284554	AL022318.4	protein_coding	0.632355	0	0	0	0	0
ENSG00000282988	AL031777.3	protein_coding	2.86112	9.99171	7.16655	3.76431	7.02995	2.07624
ENSG00000284395	AL032819.3	protein_coding	0.156998	0.272809	0.1849	0.229398	0.427594	0.051867
ENSG00000285283	AL035078.4	protein_coding	0	0	0	0	0	0
ENSG00000284755	AL049557.1	protein_coding	0	0	0	0.30548	0.008074	0.162918
ENSG00000260861	AL049634.2	protein_coding	0	0	0.518476	2.65946	1.1307	0.445157
ENSG00000258973	AL096870.1	protein_coding	1.65659	1.89612	1.42171	0.763245	1.04735	0.857489
ENSG00000277726	AL109811.4	protein_coding	10.1266	11.7103	15.6483	0.114743	10.5078	5.90848
ENSG00000273047	AL121845.2	protein_coding	0.753552	1.14625	1.4002	2.66146	1.41182	0.254694
ENSG00000273154	AL121845.3	protein_coding	2.50802	3.21368	3.38639	3.83235	4.72737	5.972
ENSG00000284776	AL121900.2	protein_coding	0	0	0.118202	0	0	0
ENSG00000254692	AL136295.1	protein_coding	0	0.026365	0	0	0	0
ENSG00000259371	AL136295.3	protein_coding	0	0.401505	0.525025	0.72776	0.439778	0.000677
ENSG00000282881	AL136373.1	protein_coding	0	0	0	0	0.049313	0
ENSG00000231767	AL136454.1	protein_coding	24.3767	22.5301	15.2826	22.3167	13.0667	14.7031
ENSG00000283384	AL138694.1	protein_coding	0	0	0	0	0	0.067092
ENSG00000258465	AL139011.2	protein_coding	0.828473	1.11594	0.81312	0.539998	0.637701	0.687889
ENSG00000203546	AL139353.1	protein_coding	0	0	0	0	0.096567	0.019944
ENSG00000282246	AL157392.5	protein_coding	0	0	0.154538	0.006096	0	0
ENSG00000249141	AL159163.1	protein_coding	0	0.593647	0.74017	0.245216	0	0.910759
ENSG00000187186	AL162231.1	protein_coding	0.040684	0.061945	0	0.049612	0.068583	0
ENSG00000258728	AL162231.3	protein_coding	0.578148	0.403326	0.641447	0	1.63041	0.486917
ENSG00000285245	AL162417.1	protein_coding	0	0	0.048914	2.05073	0	0
ENSG00000278384	AL354822.1	protein_coding	1.41837	1.32292	0.890898	12.7553	0.181369	0.667262
ENSG00000258989	AL355916.3	protein_coding	0.078716	0	0	0.086393	0.179048	0
ENSG00000285130	AL358113.1	protein_coding	0.077496	0	2.17843	0	0	0
ENSG00000254536	AL360181.3	protein_coding	0	0.368611	0.327536	1.25582	0.368613	3.18916
ENSG00000236782	AL391650.1	protein_coding	0.106597	0	0	0.312669	0.166062	0.099499
ENSG00000274068	AL449266.1	protein_coding	0.113118	0	0.190309	0	0.002108	0.002366
ENSG00000284188	AL451007.3	protein_coding	0	0	0	0	0	0
ENSG00000282804	AL512428.1	protein_coding	0	0	0	0	0	0
ENSG00000284299	AL590132.1	protein_coding	0.038692	0	0	0	0.014644	0
ENSG00000273748	AL592183.1	protein_coding	7.64188	5.38531	6.87486	6.05929	1.47621	6.95242
ENSG00000244255	AL645922.1	protein_coding	0.233163	0.212745	0	0.208683	0	0.115295
ENSG00000248993	AL645941.2	protein_coding	0.002478	0	0	0	0	0
ENSG00000285064	AL662820.1	protein_coding	0	0	0	0	0	0
ENSG00000285085	AL662884.4	protein_coding	0.873337	0.08017	0.119274	0	0.15283	0.187133
ENSG00000263020	AL662899.2	protein_coding	0.000736	3.24235	2.65215	0.160507	0.581085	2.26387
ENSG00000250264	AL669918.1	protein_coding	0.229888	0.113494	0.182258	0.324119	0.160589	0.439067
ENSG00000148218	ALAD	protein_coding	5.00844	7.0949	5.77522	10.6181	5.59864	9.30551
ENSG00000023330	ALAS1	protein_coding	4.24104	3.46553	3.94837	6.85888	6.0756	7.65148
ENSG00000158578	ALAS2	protein_coding	0.096191	0.325758	0.124247	0.827281	0.19454	0.157902
ENSG00000163631	ALB	protein_coding	0.043079	0	0.258475	0.025438	0	0.145466
ENSG00000170017	ALCAM	protein_coding	2.97275	3.24134	3.07576	3.08242	4.26132	3.4104
ENSG00000161618	ALDH16A1	protein_coding	11.6979	14.2115	9.55291	31.4061	12.6888	20.2635
ENSG00000059573	ALDH18A1	protein_coding	7.77571	7.94319	5.7817	11.0705	7.48867	10.6154
ENSG00000165092	ALDH1A1	protein_coding	0	0	0	0.027322	0	0.052168
ENSG00000128918	ALDH1A2	protein_coding	0	0	0	0.250326	0	0
ENSG00000184254	ALDH1A3	protein_coding	0	0	0.01279	0.006584	0	0.042382
ENSG00000137124	ALDH1B1	protein_coding	0.950195	1.16746	0.68874	1.54537	0.665077	1.65487
ENSG00000136010	ALDH1L2	protein_coding	0.229154	0.055097	0.090447	0.058691	0	0.010911
ENSG00000111275	ALDH2	protein_coding	0.446239	0.697505	0.546901	1.74151	1.11299	0.807931
ENSG00000072210	ALDH3A2	protein_coding	6.98647	8.73035	6.98143	8.38495	5.12732	11.1788
ENSG00000006534	ALDH3B1	protein_coding	0.844475	0.948189	0.419919	8.87524	2.93913	2.34716
ENSG00000159423	ALDH4A1	protein_coding	0.234644	0.407332	0.21399	1.3743	0.57744	0.638845
ENSG00000112294	ALDH5A1	protein_coding	4.99181	3.74964	4.73093	2.57238	5.35931	4.17247
ENSG00000119711	ALDH6A1	protein_coding	2.98432	3.38861	3.09835	2.91451	2.45018	3.17681
ENSG00000164904	ALDH7A1	protein_coding	0.10363	0.217134	0.126103	0.164668	0.108498	0.27475
ENSG00000118514	ALDH8A1	protein_coding	1.25502	1.899	2.83241	1.4364	1.42722	1.35235
ENSG00000143149	ALDH9A1	protein_coding	10.8188	13.0981	9.61009	17.6835	10.1016	16.643
ENSG00000149925	ALDOA	protein_coding	102.619	114.694	101.221	201.746	103.829	129.268
ENSG00000136872	ALDOB	protein_coding	0	0	0	0	0	0.046233
ENSG00000109107	ALDOC	protein_coding	5.98997	8.76989	4.52216	8.61399	4.99455	7.53196
ENSG00000033011	ALG1	protein_coding	4.51239	6.05214	3.28838	7.93846	4.25635	7.91111
ENSG00000139133	ALG10	protein_coding	6.90634	7.25441	7.85658	4.64625	6.84202	7.479
ENSG00000175548	ALG10B	protein_coding	3.45665	3.26364	3.56721	1.98007	3.86031	2.51152
ENSG00000253710	ALG11	protein_coding	13.7714	12.3398	13.715	7.7052	12.2652	12.8637
ENSG00000182858	ALG12	protein_coding	5.61989	5.85087	7.33908	7.62268	7.29029	6.40409
ENSG00000101901	ALG13	protein_coding	29.0565	34.5543	27.7775	29.3678	30.9343	48.819
ENSG00000172339	ALG14	protein_coding	0.228449	0.162778	0.186303	0.205208	0.256409	0.372796
ENSG00000189366	ALG1L	protein_coding	0.448643	0.350027	0	0.083888	0	0.070384
ENSG00000251287	ALG1L2	protein_coding	0.194452	0.353693	0.115941	0.380983	0.360925	0.355794
ENSG00000119523	ALG2	protein_coding	13.979	14.0205	10.3711	10.4815	12.8622	10.9539
ENSG00000214160	ALG3	protein_coding	4.37198	4.54703	3.28947	9.84906	4.6239	7.75739
ENSG00000120697	ALG5	protein_coding	10.4219	8.92644	9.09033	7.63564	10.9392	9.3803
ENSG00000088035	ALG6	protein_coding	7.33389	6.59143	6.02593	4.26031	6.03323	7.55778
ENSG00000159063	ALG8	protein_coding	8.4279	9.16891	7.63378	7.92145	8.30206	10.8402
ENSG00000086848	ALG9	protein_coding	10.816	11.7957	13.1691	7.09072	11.4285	9.44579
ENSG00000171094	ALK	protein_coding	0.094856	0.124484	0.309389	0.02647	0.071072	0.051603
ENSG00000189292	ALKAL2	protein_coding	0	0.161569	0.089365	0	0.184703	0.040427
ENSG00000100601	ALKBH1	protein_coding	1.89585	1.95537	2.54614	2.33891	1.86672	2.93365
ENSG00000189046	ALKBH2	protein_coding	2.15466	2.68741	3.36639	3.063	3.17312	2.89575
ENSG00000166199	ALKBH3	protein_coding	7.90321	8.2675	8.36218	6.79445	8.79643	9.48865
ENSG00000160993	ALKBH4	protein_coding	2.07066	2.8758	2.42519	3.34515	2.91002	2.43585
ENSG00000091542	ALKBH5	protein_coding	48.0757	48.8507	48.9079	48.2769	44.5302	45.6749
ENSG00000239382	ALKBH6	protein_coding	5.95107	6.09308	5.38437	7.47629	3.78301	5.53822
ENSG00000125652	ALKBH7	protein_coding	22.468	21.9337	15.8259	30.9867	15.3021	15.6422
ENSG00000137760	ALKBH8	protein_coding	3.65513	3.42298	2.83502	1.67124	3.63391	3.61599
ENSG00000116127	ALMS1	protein_coding	13.928	14.0547	15.4817	7.13826	13.3535	14.2085
ENSG00000108839	ALOX12	protein_coding	0.833006	1.23137	0.58557	0.538753	0.456521	0.245588
ENSG00000179477	ALOX12B	protein_coding	0.031411	0.047674	0.047281	0.048901	0.008694	0.074271
ENSG00000161905	ALOX15	protein_coding	0	0.024995	0.200098	0.04108	0.091187	0.033341
ENSG00000179593	ALOX15B	protein_coding	0	0	0	0.042035	0	0
ENSG00000012779	ALOX5	protein_coding	3.8127	3.53801	2.31695	18.6628	4.52847	6.03481
ENSG00000132965	ALOX5AP	protein_coding	13.2194	13.2058	8.51944	16.6354	10.5028	20.923
ENSG00000179148	ALOXE3	protein_coding	0.052745	0.106275	0.085494	0.006197	0.16329	0.051483
ENSG00000163286	ALPG	protein_coding	0	0.033741	0	0.017972	0	0
ENSG00000163295	ALPI	protein_coding	0.105503	0.032877	0.077141	0	0	0
ENSG00000073331	ALPK1	protein_coding	3.38508	3.45229	4.30952	4.28814	3.19491	5.8938
ENSG00000198796	ALPK2	protein_coding	0.223631	0.111226	0.051796	0.203713	0.382503	0.488261
ENSG00000136383	ALPK3	protein_coding	0.169738	0.093292	0.154636	0.199512	0.187309	0.164943
ENSG00000162551	ALPL	protein_coding	0.301241	0.194072	0.365538	0.237189	0.102169	0
ENSG00000163283	ALPP	protein_coding	0	0	0	0	0	0.034264
ENSG00000003393	ALS2	protein_coding	3.53626	3.3426	2.58299	2.63094	3.32261	4.5793
ENSG00000178038	ALS2CL	protein_coding	6.94017	11.4104	8.58288	11.727	7.40448	9.34032
ENSG00000155749	ALS2CR12	protein_coding	1.41516	1.1404	2.22201	0.752762	1.45543	1.86007
ENSG00000156150	ALX3	protein_coding	0.052442	0.019855	0.141907	0.322269	0.105327	0
ENSG00000052850	ALX4	protein_coding	0	0.058516	0	0.039579	0.046312	0.029429
ENSG00000183684	ALYREF	protein_coding	12.7596	13.9639	11.8212	20.5309	14.7897	15.3097
ENSG00000242110	AMACR	protein_coding	1.29622	1.28545	1.54261	1.32252	1.26093	2.14683
ENSG00000110497	AMBRA1	protein_coding	16.7583	18.1357	18.0879	19.1376	18.8457	22.3883
ENSG00000123505	AMD1	protein_coding	48.2856	40.4323	23.5447	34.6944	39.2787	31.7909
ENSG00000139344	AMDHD1	protein_coding	0.556098	0.415351	0.627034	0.145615	0.619211	0.4488
ENSG00000162066	AMDHD2	protein_coding	21.1457	22.5847	22.1522	27.0812	21.4669	24.3885
ENSG00000184675	AMER1	protein_coding	1.84767	2.31523	2.02019	1.93116	1.79683	2.16127
ENSG00000165566	AMER2	protein_coding	0	0.026311	0	0	0	0
ENSG00000159461	AMFR	protein_coding	36.1669	31.3858	31.9931	35.7504	37.4882	27.3246
ENSG00000104899	AMH	protein_coding	0.619942	0.978161	1.48151	1.01195	1.00951	0.885764
ENSG00000135409	AMHR2	protein_coding	0.036536	0	0.028064	0.050055	0	0.023067
ENSG00000181754	AMIGO1	protein_coding	9.17901	10.0135	10.909	3.65038	9.11525	6.30269
ENSG00000139211	AMIGO2	protein_coding	5.83676	4.74915	5.52752	3.26004	5.10593	8.71208
ENSG00000176020	AMIGO3	protein_coding	4.34114	3.97666	3.6046	1.27477	4.37973	3.19036
ENSG00000101935	AMMECR1	protein_coding	8.8407	7.75076	6.91535	7.38512	7.04904	9.75072
ENSG00000144233	AMMECR1L	protein_coding	4.73414	4.85406	4.35157	6.01512	4.43362	6.00238
ENSG00000166126	AMN	protein_coding	1.08258	1.07799	0.685556	2.3229	1.45397	1.71992
ENSG00000151743	AMN1	protein_coding	5.44063	5.31139	5.41391	5.31839	4.74811	6.29561
ENSG00000126016	AMOT	protein_coding	0.997615	0.628099	0.375042	0.445591	0.759136	1.04133
ENSG00000166025	AMOTL1	protein_coding	0.107195	0.197721	0.147	0.15621	0.140005	0.138955
ENSG00000114019	AMOTL2	protein_coding	0.030338	0.037211	0.056746	0	0	0.03664
ENSG00000116748	AMPD1	protein_coding	0	0	0	0	0	0
ENSG00000116337	AMPD2	protein_coding	16.9422	17.9762	18.1319	41.9651	18.5216	19.082
ENSG00000133805	AMPD3	protein_coding	4.2879	6.15477	7.30582	9.01593	5.45916	9.38862
ENSG00000078053	AMPH	protein_coding	0.010116	0	0	0	0.019477	0
ENSG00000145020	AMT	protein_coding	6.78407	6.48866	7.65642	8.00305	7.17699	5.32266
ENSG00000187689	AMTN	protein_coding	0	0.081115	0	0	0	0
ENSG00000237763	AMY1A	protein_coding	0.417294	0	0	0	0	0
ENSG00000174876	AMY1B	protein_coding	0	0.044874	0.163163	0.117534	0	0.158607
ENSG00000187733	AMY1C	protein_coding	0.460133	0.604762	0.31477	0	0.3915	0.502213
ENSG00000243480	AMY2A	protein_coding	0	0	0.149263	0	0.593851	0.126176
ENSG00000240038	AMY2B	protein_coding	18.8035	17.2766	18.3243	12.5921	17.957	22.1247
ENSG00000174945	AMZ1	protein_coding	0.106043	0.098071	0.123808	0.186937	0.099382	0.209098
ENSG00000196704	AMZ2	protein_coding	12.218	13.5157	12.0368	14.0185	14.7633	10.5311
ENSG00000153107	ANAPC1	protein_coding	12.5658	13.4505	14.1078	11.0009	15.1141	14.5371
ENSG00000164162	ANAPC10	protein_coding	20.2881	20.0933	21.2174	11.6646	22.3172	13.7333
ENSG00000141552	ANAPC11	protein_coding	12.0617	10.8146	7.70624	18.8446	7.0752	11.4646
ENSG00000129055	ANAPC13	protein_coding	5.05514	7.99481	7.70522	7.80669	6.05593	7.73112
ENSG00000110200	ANAPC15	protein_coding	7.48642	7.37925	7.20817	8.63682	7.70318	7.96835
ENSG00000166295	ANAPC16	protein_coding	29.8405	34.3321	26.1461	34.8767	27.3218	32.6294
ENSG00000176248	ANAPC2	protein_coding	23.8857	25.2581	25.8633	34.7021	24.26	27.4812
ENSG00000053900	ANAPC4	protein_coding	14.3754	16.1735	13.8659	20.2138	15.1366	18.2263
ENSG00000089053	ANAPC5	protein_coding	51.98	54.8484	46.6042	57.0222	51.8558	60.6141
ENSG00000196510	ANAPC7	protein_coding	9.29494	11.318	10.4808	10.9316	12.226	16.3114
ENSG00000214274	ANG	protein_coding	0.202787	0.13767	0	0.021984	0	0.046211
ENSG00000013523	ANGEL1	protein_coding	8.71688	10.1884	11.332	11.572	11.0334	12.1041
ENSG00000174606	ANGEL2	protein_coding	12.6215	12.6653	14.2963	7.32895	12.9555	12.855
ENSG00000154188	ANGPT1	protein_coding	0.089509	0.019195	0.039291	0	0.014548	0
ENSG00000091879	ANGPT2	protein_coding	0.193141	0.371784	0.200995	0.204002	0.054184	0.142666
ENSG00000101280	ANGPT4	protein_coding	0.050926	0.026444	0	0	0	0
ENSG00000116194	ANGPTL1	protein_coding	0	0.027315	0.036015	0.009144	0.00933	0
ENSG00000136859	ANGPTL2	protein_coding	0.052597	0	0.09748	0.052398	0.095605	0.09282
ENSG00000132855	ANGPTL3	protein_coding	0	0.015173	0	0	0	0
ENSG00000167772	ANGPTL4	protein_coding	0.175526	0.187144	0.045511	0.079732	0.191273	0.129138
ENSG00000130812	ANGPTL6	protein_coding	1.04167	1.24751	1.01537	1.67282	0.800068	1.10682
ENSG00000171819	ANGPTL7	protein_coding	0.025666	0.118422	0.176007	0.101103	0.085607	0.043199
ENSG00000029534	ANK1	protein_coding	2.65292	2.67735	1.99626	1.50145	1.77623	1.35447
ENSG00000145362	ANK2	protein_coding	0	0.01008	0.006024	0	0	0
ENSG00000151150	ANK3	protein_coding	49.8028	47.0672	73.9656	27.6188	61.1201	48.5706
ENSG00000151687	ANKAR	protein_coding	3.33062	3.08184	3.15917	1.24994	3.2633	3.16195
ENSG00000166839	ANKDD1A	protein_coding	2.07761	2.76926	5.93483	4.09389	3.97569	2.78444
ENSG00000189045	ANKDD1B	protein_coding	0.013436	0.242813	0.168062	0.205126	0.207779	0.195545
ENSG00000132623	ANKEF1	protein_coding	1.40941	0.620769	0.811004	0.970355	0.621063	1.28164
ENSG00000153930	ANKFN1	protein_coding	0	0	0	0	0	0
ENSG00000185722	ANKFY1	protein_coding	13.7369	13.8839	11.7469	15.3574	13.3706	26.4397
ENSG00000154122	ANKH	protein_coding	11.0744	12.9364	11.3269	10.3289	8.57103	16.8125
ENSG00000131503	ANKHD1	protein_coding	58.4231	67.5468	89.2664	46.2558	50.5211	47.9681
ENSG00000254996	ANKHD1-EIF4EBP3	protein_coding	20.3623	16.614	16.0292	18.8384	20.1704	24.1012
ENSG00000001629	ANKIB1	protein_coding	13.2752	14.5401	12.7635	11.6074	12.6706	15.0533
ENSG00000170209	ANKK1	protein_coding	1.33188	1.1417	2.32674	0.783533	1.31223	1.65639
ENSG00000160117	ANKLE1	protein_coding	0.552541	0.462459	0.406668	1.748	0.387718	0.6247
ENSG00000176915	ANKLE2	protein_coding	29.5308	28.3168	34.2444	27.4793	32.2185	33.2433
ENSG00000144504	ANKMY1	protein_coding	16.2664	21.8369	18.5465	19.6582	12.8326	20.8081
ENSG00000106524	ANKMY2	protein_coding	5.02356	4.00053	5.34161	4.74466	5.3185	6.387
ENSG00000164331	ANKRA2	protein_coding	15.3869	13.6957	16.5398	11.4252	15.079	11.3103
ENSG00000088448	ANKRD10	protein_coding	50.2578	47.1287	47.8439	47.497	55.8796	51.8459
ENSG00000167522	ANKRD11	protein_coding	75.7579	87.193	119.061	93.0182	101.008	95.1967
ENSG00000101745	ANKRD12	protein_coding	52.0844	54.0948	48.3568	56.9278	49.636	41.9074
ENSG00000076513	ANKRD13A	protein_coding	19.9525	24.0032	22.0634	26.1566	28.427	30.5557
ENSG00000198720	ANKRD13B	protein_coding	0.502003	0.531306	1.02486	1.69213	0.66185	0.643457
ENSG00000118454	ANKRD13C	protein_coding	14.9728	14.9223	17.7015	13.1147	14.5672	13.5239
ENSG00000172932	ANKRD13D	protein_coding	23.1185	24.5751	22.6303	46.7018	23.6045	36.2945
ENSG00000134461	ANKRD16	protein_coding	1.94079	2.87456	3.35424	3.78606	2.67775	2.94109
ENSG00000132466	ANKRD17	protein_coding	15.3176	15.8394	16.5181	14.9524	15.5015	20.5043
ENSG00000180071	ANKRD18A	protein_coding	1.74159	1.27541	1.30821	0.458684	1.24502	1.39945
ENSG00000230453	ANKRD18B	protein_coding	0	0.021477	0.05621	0	0.052934	0.037543
ENSG00000260691	ANKRD20A1	protein_coding	0	0.01708	0	0	0.151338	0.044715
ENSG00000183148	ANKRD20A2	protein_coding	0	0.012342	0	0	0	0.016138
ENSG00000276203	ANKRD20A3	protein_coding	0	0.085147	0.021286	0.11522	0.027982	0
ENSG00000172014	ANKRD20A4	protein_coding	0.069176	0.156584	0.067538	0.06788	0.115529	0
ENSG00000152766	ANKRD22	protein_coding	0	0.053802	0	0.700983	0.166571	0.066388
ENSG00000163126	ANKRD23	protein_coding	5.60426	4.93797	4.89533	8.07291	5.27756	6.33511
ENSG00000089847	ANKRD24	protein_coding	0.522962	0.570424	0.690385	0.561205	0.731572	0.435428
ENSG00000107890	ANKRD26	protein_coding	4.80908	4.03889	6.42984	2.79253	3.74334	5.67536
ENSG00000105186	ANKRD27	protein_coding	10.3503	11.0359	8.81278	12.0725	9.72915	15.0118
ENSG00000206560	ANKRD28	protein_coding	14.6069	12.6911	16.2028	6.61607	10.5041	10.2088
ENSG00000154065	ANKRD29	protein_coding	0.073463	0.057095	0.117798	0.038953	0.045288	0.066973
ENSG00000163046	ANKRD30BL	protein_coding	0	0	0	0	0	0
ENSG00000145700	ANKRD31	protein_coding	0.225245	0.197592	0.645148	0.088911	0.358249	0.597284
ENSG00000167612	ANKRD33	protein_coding	0	0	0.044047	0	0	0
ENSG00000164236	ANKRD33B	protein_coding	0.424454	0.636218	0.468349	1.077	0.642547	0.465261
ENSG00000272031	ANKRD34A	protein_coding	0.659663	0.341536	0.512979	0.731333	0.265731	0.670458
ENSG00000189127	ANKRD34B	protein_coding	0	0	0	0.02921	0	0
ENSG00000198483	ANKRD35	protein_coding	0	0.035405	0	0.017225	0	0
ENSG00000135976	ANKRD36	protein_coding	30.3455	29.1129	33.3546	18.0661	31.7934	29.9945
ENSG00000196912	ANKRD36B	protein_coding	18.9075	17.2422	18.6269	12.0402	14.2848	21.4371
ENSG00000174501	ANKRD36C	protein_coding	28.8011	30.2862	38.2263	17.1123	35.1022	34.2834
ENSG00000186352	ANKRD37	protein_coding	6.42109	4.37329	4.59456	7.98081	7.87063	5.45873
ENSG00000213337	ANKRD39	protein_coding	12.2013	9.36166	8.47187	11.4258	7.6195	8.79087
ENSG00000154945	ANKRD40	protein_coding	13.4709	13.6912	14.0356	10.9597	12.2385	12.221
ENSG00000137494	ANKRD42	protein_coding	1.95512	2.33545	2.15522	1.82935	3.52813	2.20892
ENSG00000065413	ANKRD44	protein_coding	126.301	120.893	127.362	80.7773	119.283	108.941
ENSG00000183831	ANKRD45	protein_coding	0.066296	0	0	0	0	0
ENSG00000186106	ANKRD46	protein_coding	8.27116	6.82681	8.28081	5.32963	5.18608	6.91118
ENSG00000168876	ANKRD49	protein_coding	24.0498	16.0713	17.428	8.95869	17.0053	14.3334
ENSG00000151458	ANKRD50	protein_coding	0.258411	0.300538	0.150403	0.749093	0.456869	0.336219
ENSG00000139645	ANKRD52	protein_coding	10.8618	11.1582	12.091	13.8643	12.2234	13.6768
ENSG00000144031	ANKRD53	protein_coding	0.283184	0.134132	0	0.052429	0.314815	0.010555
ENSG00000100124	ANKRD54	protein_coding	4.36489	4.49997	4.27905	8.17509	4.38298	7.49454
ENSG00000164512	ANKRD55	protein_coding	4.45298	3.6704	1.86498	4.61373	4.95012	10.2789
ENSG00000135299	ANKRD6	protein_coding	1.54114	1.76119	1.59889	0.39003	1.05203	1.20207
ENSG00000157999	ANKRD61	protein_coding	0.51502	0.140731	0.728762	0.599147	0.481512	0.475392
ENSG00000230778	ANKRD63	protein_coding	0	0	0	0.436828	0	0.099141
ENSG00000235098	ANKRD65	protein_coding	0	0.115228	0	0.215233	0.205292	0.025528
ENSG00000106013	ANKRD7	protein_coding	0.050554	0	0	0	0	0
ENSG00000156381	ANKRD9	protein_coding	1.02082	0.770744	0.77905	1.99124	0.854288	1.27738
ENSG00000064999	ANKS1A	protein_coding	4.4141	5.30927	5.21719	5.61662	5.18248	5.99984
ENSG00000185046	ANKS1B	protein_coding	0.090617	0.235676	0.163451	0.520129	0.20497	0.256887
ENSG00000168096	ANKS3	protein_coding	5.66988	5.94676	6.53833	9.65788	6.33154	8.53374
ENSG00000165138	ANKS6	protein_coding	2.77252	3.24043	3.7912	2.21912	2.57741	3.28767
ENSG00000163516	ANKZF1	protein_coding	26.7664	28.7001	33.9038	29.7582	30.0489	35.1161
ENSG00000011426	ANLN	protein_coding	0.398519	0.351729	0.130066	0.422797	0.410692	0.603653
ENSG00000160746	ANO10	protein_coding	4.37112	3.61537	3.71786	2.35065	5.10116	4.49873
ENSG00000047617	ANO2	protein_coding	0	0	0.022988	0	0	0
ENSG00000151572	ANO4	protein_coding	0	0	0.055254	0	0	0
ENSG00000171714	ANO5	protein_coding	0	0.032486	0	0.017282	0.096978	0
ENSG00000177119	ANO6	protein_coding	11.4767	12.386	10.0647	9.67067	9.74476	10.7671
ENSG00000146205	ANO7	protein_coding	0.025495	0.036089	0.053244	0.018668	0.087515	0.070921
ENSG00000074855	ANO8	protein_coding	7.40248	8.39915	7.30327	12.6006	7.96796	9.7537
ENSG00000185101	ANO9	protein_coding	25.055	25.3015	27.8354	41.1433	25.1707	38.522
ENSG00000011201	ANOS1	protein_coding	0.01544	0	0	0.010409	0	0
ENSG00000140350	ANP32A	protein_coding	24.3077	23.0989	23.1141	22.6088	21.9718	24.2764
ENSG00000136938	ANP32B	protein_coding	38.4803	52.2748	55.1253	49.0686	48.6207	53.5085
ENSG00000139223	ANP32D	protein_coding	0	0	0	0	0	0
ENSG00000143401	ANP32E	protein_coding	27.4159	20.3923	23.4317	23.283	21.7314	25.7685
ENSG00000166825	ANPEP	protein_coding	0.574912	0.969691	0.566041	8.47967	1.12502	0.889261
ENSG00000169604	ANTXR1	protein_coding	0.225583	0.189504	0.127954	0	0	0
ENSG00000163297	ANTXR2	protein_coding	11.4034	11.2857	8.54003	9.7276	6.7106	11.2807
ENSG00000274209	ANTXRL	protein_coding	0	0	0	0	0	0.017465
ENSG00000135046	ANXA1	protein_coding	145.095	103.403	61.1397	79.0336	123.734	79.2244
ENSG00000109511	ANXA10	protein_coding	0	0	0	0	0	0
ENSG00000122359	ANXA11	protein_coding	33.4305	36.06	44.4559	37.5341	33.5066	33.9791
ENSG00000182718	ANXA2	protein_coding	34.5581	32.9003	18.4096	47.5907	35.6208	37.1722
ENSG00000177721	ANXA2R	protein_coding	11.2063	18.7429	12.7548	16.6779	10.8372	11.7912
ENSG00000138772	ANXA3	protein_coding	0.069975	0.159589	0	0.109783	0	0
ENSG00000196975	ANXA4	protein_coding	2.2279	1.49745	1.20925	3.93269	2.62274	3.32593
ENSG00000164111	ANXA5	protein_coding	25.5631	28.8492	14.9628	41.8468	31.9639	30.8735
ENSG00000197043	ANXA6	protein_coding	105.289	102.027	71.6903	120.071	78.8065	132.793
ENSG00000138279	ANXA7	protein_coding	48.9912	45.5971	48.9226	33.2071	44.2885	39.9719
ENSG00000265190	ANXA8	protein_coding	0	0	0	0	0	0
ENSG00000264230	ANXA8L1	protein_coding	0	0	0	0.039146	0	0
ENSG00000143412	ANXA9	protein_coding	0.349971	0.438142	0.208644	0.340736	0.1431	0.173983
ENSG00000136250	AOAH	protein_coding	6.25155	9.60046	7.201	12.2068	8.56969	6.62064
ENSG00000002726	AOC1	protein_coding	0	0	0.027334	0	0	0.018073
ENSG00000131480	AOC2	protein_coding	1.32168	1.25361	1.76476	1.85678	1.79343	1.51347
ENSG00000131471	AOC3	protein_coding	0.106949	0.251359	0.25225	0.355414	0.30938	0.420555
ENSG00000138356	AOX1	protein_coding	0	0.016412	0	0	0	0.011055
ENSG00000265590	AP000275.2	protein_coding	0	0	0	0.056335	0	0
ENSG00000249624	AP000295.1	protein_coding	0	0	0	0	4.28002	0
ENSG00000249209	AP000311.1	protein_coding	0.218129	0.720215	0.073771	0.194516	0.348006	0.364576
ENSG00000251357	AP000350.4	protein_coding	0	0	0	0	2.76114	0
ENSG00000285509	AP000646.1	protein_coding	0	0	0	0	0.296447	0
ENSG00000254979	AP000781.2	protein_coding	0	0	0.23009	0	0.035737	0
ENSG00000284873	AP000790.3	protein_coding	0	0.033333	0	0	0	0
ENSG00000284057	AP001273.2	protein_coding	0	0	7.75975	0	0	0
ENSG00000258529	AP001781.2	protein_coding	0	0	0.021535	0	0	0.020343
ENSG00000285231	AP002347.1	protein_coding	0	0	0	0.135451	0	0
ENSG00000254469	AP002495.2	protein_coding	8.27389	8.7129	10.7655	6.38865	6.81652	8.807
ENSG00000256349	AP002748.4	protein_coding	0	0	1.4749	0	0	0
ENSG00000284713	AP003071.5	protein_coding	0.19568	0.472216	0.240824	0.76464	0.320425	0.89982
ENSG00000256591	AP003108.2	protein_coding	2.43357	2.29778	2.06932	0.84752	1.17959	2.36098
ENSG00000256514	AP003419.1	protein_coding	0	0	0	0	0.063499	0.081771
ENSG00000138660	AP1AR	protein_coding	4.23716	4.48363	3.28394	6.82746	2.75498	7.02835
ENSG00000100280	AP1B1	protein_coding	15.1676	17.1882	14.6995	23.5363	16.1917	19.571
ENSG00000166747	AP1G1	protein_coding	46.8196	40.7649	51.454	36.1881	44.0203	33.0338
ENSG00000213983	AP1G2	protein_coding	39.0173	44.1627	35.8057	59.2871	38.746	59.8943
ENSG00000072958	AP1M1	protein_coding	9.05034	8.86521	10.1428	21.3847	8.53829	15.2759
ENSG00000129354	AP1M2	protein_coding	0	0.069897	0.048672	0.095496	0.03789	0
ENSG00000106367	AP1S1	protein_coding	2.44184	3.14666	2.91092	5.24392	2.84395	4.98909
ENSG00000182287	AP1S2	protein_coding	9.4412	13.4761	8.27043	17.2966	12.2355	13.7742
ENSG00000152056	AP1S3	protein_coding	1.04329	0.768384	1.23403	1.13519	1.63915	1.41544
ENSG00000196961	AP2A1	protein_coding	12.3098	14.0417	12.2668	34.3117	15.9547	21.4926
ENSG00000183020	AP2A2	protein_coding	13.5911	16.655	16.7441	28.5555	14.7299	25.2561
ENSG00000006125	AP2B1	protein_coding	41.8054	40.8588	32.74	28.8288	30.2488	58.5234
ENSG00000161203	AP2M1	protein_coding	47.1442	46.4616	35.6026	48.334	37.8992	45.7649
ENSG00000042753	AP2S1	protein_coding	7.52589	7.52002	8.48298	25.1332	13.3453	9.5483
ENSG00000132842	AP3B1	protein_coding	18.7194	17.599	17.9781	11.9556	21.1013	21.8418
ENSG00000103723	AP3B2	protein_coding	0.052349	0.031461	0.053305	0	0.124256	0.085942
ENSG00000065000	AP3D1	protein_coding	19.8017	21.4671	21.8036	40.0337	21.3168	31.649
ENSG00000185009	AP3M1	protein_coding	12.6184	11.7248	10.5146	8.54642	10.737	11.2827
ENSG00000070718	AP3M2	protein_coding	51.8628	43.046	48.8739	30.686	46.7614	32.3983
ENSG00000177879	AP3S1	protein_coding	13.4342	12.8929	9.02245	11.6958	12.2588	11.3466
ENSG00000157823	AP3S2	protein_coding	6.28955	9.36424	6.91629	7.60436	6.96281	7.45718
ENSG00000134262	AP4B1	protein_coding	12.2645	13.6282	10.8454	11.4055	12.4329	14.0611
ENSG00000081014	AP4E1	protein_coding	4.17364	4.06216	3.9727	4.1409	5.46657	5.86353
ENSG00000221838	AP4M1	protein_coding	1.8993	2.30757	1.43414	3.17012	2.29143	2.1782
ENSG00000100478	AP4S1	protein_coding	13.9324	10.5149	15.3236	8.54838	11.0455	10.0002
ENSG00000254470	AP5B1	protein_coding	11.9211	12.249	11.3544	23.1076	12.9626	12.8138
ENSG00000053770	AP5M1	protein_coding	12.3634	12.2848	16.5914	8.25785	11.807	11.6014
ENSG00000125843	AP5S1	protein_coding	1.46824	2.3814	2.41883	2.33871	1.91172	3.1011
ENSG00000242802	AP5Z1	protein_coding	21.8871	22.447	20.9421	38.491	24.0243	30.0933
ENSG00000120868	APAF1	protein_coding	8.21061	17.7366	13.8174	10.975	9.2016	10.0762
ENSG00000107282	APBA1	protein_coding	0.894597	0.24014	0.607874	1.13139	0.166806	0.373547
ENSG00000034053	APBA2	protein_coding	27.5344	38.0984	47.5173	16.7054	52.8714	44.2738
ENSG00000011132	APBA3	protein_coding	15.987	17.4734	17.29	25.4309	12.5259	21.2197
ENSG00000166313	APBB1	protein_coding	30.8484	36.6083	39.2244	27.2158	29.171	31.2461
ENSG00000077420	APBB1IP	protein_coding	35.0251	40.019	40.9108	43.9501	41.117	53.0833
ENSG00000163697	APBB2	protein_coding	0.032525	0.023407	0.040699	0.063578	0.02231	0.031302
ENSG00000113108	APBB3	protein_coding	12.1908	13.6548	13.8753	16.7226	12.6145	15.9056
ENSG00000134982	APC	protein_coding	11.0722	6.18941	13.1962	7.23542	8.55832	14.8643
ENSG00000115266	APC2	protein_coding	0.232654	0.159472	0.189699	0.518078	0.21025	0.330964
ENSG00000154856	APCDD1	protein_coding	0	0.022084	0	0.060453	0	0.039909
ENSG00000198768	APCDD1L	protein_coding	0	0.024552	0	0.033046	0.05103	0
ENSG00000164062	APEH	protein_coding	14.3147	16.8373	15.5454	22.3329	13.8714	17.821
ENSG00000100823	APEX1	protein_coding	12.2287	30.184	25.1261	10.5473	10.6671	32.5176
ENSG00000169188	APEX2	protein_coding	2.70521	2.91031	2.1155	4.12182	2.56311	4.37134
ENSG00000117362	APH1A	protein_coding	35.104	31.3418	33.6239	34.891	29.4373	29.545
ENSG00000138613	APH1B	protein_coding	7.64383	8.69398	8.65352	4.16954	6.17326	6.27005
ENSG00000166181	API5	protein_coding	30.1102	27.2207	31.9843	18.5348	25.0572	26.5127
ENSG00000149089	APIP	protein_coding	4.10388	4.52923	4.67292	2.17188	4.44201	3.00454
ENSG00000171388	APLN	protein_coding	0	0	0.026682	0	0	0
ENSG00000134817	APLNR	protein_coding	0	0	0	0	0.017401	0
ENSG00000105290	APLP1	protein_coding	0.050458	0.064354	0.102738	0	0.013498	0.030808
ENSG00000084234	APLP2	protein_coding	14.3532	15.106	14.2353	17.5987	14.9771	17.5061
ENSG00000101474	APMAP	protein_coding	20.0783	17.4564	12.1317	22.5152	16.2686	16.665
ENSG00000118137	APOA1	protein_coding	0.079453	0.205663	0.45996	0.191215	0.175912	0.124367
ENSG00000158874	APOA2	protein_coding	0	0	0	0.087448	0	0
ENSG00000110244	APOA4	protein_coding	0	0.057105	0	0	0	0
ENSG00000084674	APOB	protein_coding	0	0	0	0	0.004714	0
ENSG00000124701	APOBEC2	protein_coding	0.290237	0.251084	0.11793	0.417586	0.104525	0.049226
ENSG00000128383	APOBEC3A	protein_coding	0.705225	0.697473	0.392531	4.06627	1.18762	2.10766
ENSG00000179750	APOBEC3B	protein_coding	0	0.605934	0.158449	0.44348	0.697958	0.62299
ENSG00000244509	APOBEC3C	protein_coding	14.5675	15.5561	11.3659	31.9667	16.1622	20.6091
ENSG00000243811	APOBEC3D	protein_coding	5.87812	7.64774	5.49405	18.0152	7.99015	12.169
ENSG00000128394	APOBEC3F	protein_coding	6.48995	5.94035	4.1993	7.84947	4.26573	7.7415
ENSG00000239713	APOBEC3G	protein_coding	9.7901	9.67404	6.46834	18.834	8.92106	17.1029
ENSG00000100298	APOBEC3H	protein_coding	2.06949	1.77752	0.910882	5.40696	2.92883	2.79486
ENSG00000173627	APOBEC4	protein_coding	0	0.031636	0	0.021723	0	0
ENSG00000184730	APOBR	protein_coding	2.67185	2.94207	3.4864	9.3101	4.35076	5.99978
ENSG00000130208	APOC1	protein_coding	0	0.122084	0	0	0	0
ENSG00000110245	APOC3	protein_coding	0	0	0	0	0	0
ENSG00000130203	APOE	protein_coding	0.651471	0.717632	0.878504	0.747658	0.940844	0.775599
ENSG00000091583	APOH	protein_coding	0	0	0.114478	0	0	0
ENSG00000100342	APOL1	protein_coding	3.42725	4.69244	2.84325	9.88957	3.47151	3.7099
ENSG00000128335	APOL2	protein_coding	10.4889	11.6968	8.37633	20.8881	9.85618	20.1832
ENSG00000128284	APOL3	protein_coding	32.7087	45.6703	33.0077	30.5595	26.4256	42.8427
ENSG00000100336	APOL4	protein_coding	0	0	0	0.268801	0.019449	0.033105
ENSG00000128313	APOL5	protein_coding	0	0	0	0	0	0
ENSG00000221963	APOL6	protein_coding	34.6327	30.6338	27.6907	39.6365	30.7457	42.8997
ENSG00000178878	APOLD1	protein_coding	0.51546	0.837311	0.988598	1.84466	0.742628	0.661608
ENSG00000204444	APOM	protein_coding	0.775301	1.7101	1.84822	1.8709	1.37213	1.41047
ENSG00000184831	APOO	protein_coding	2.70269	1.73479	2.06426	3.23363	1.79396	3.05303
ENSG00000155008	APOOL	protein_coding	2.57032	2.74127	2.66093	2.69383	2.84109	4.40854
ENSG00000256053	APOPT1	protein_coding	7.07205	8.37835	9.83372	6.72875	8.07361	6.75277
ENSG00000142192	APP	protein_coding	16.219	21.9661	14.6274	12.7392	22.1062	23.8721
ENSG00000062725	APPBP2	protein_coding	9.19	9.35739	9.04372	8.16011	7.76488	9.16979
ENSG00000157500	APPL1	protein_coding	12.3188	12.9112	11.2507	8.00463	11.5709	11.3868
ENSG00000136044	APPL2	protein_coding	26.3021	25.2571	27.7709	12.2224	28.9672	20.0684
ENSG00000198931	APRT	protein_coding	62.6353	59.1678	47.8261	65.5015	48.1606	54.1187
ENSG00000137074	APTX	protein_coding	7.40607	7.29657	6.4969	6.28959	6.58391	7.1903
ENSG00000240583	AQP1	protein_coding	0.066822	0.075944	0	0.065961	0.065666	0.066847
ENSG00000143595	AQP10	protein_coding	0.150845	0.335731	0	0.025449	0.104667	0
ENSG00000178301	AQP11	protein_coding	0.426404	0.171333	0.538251	0.26395	0.323171	0.2933
ENSG00000184945	AQP12A	protein_coding	0	0	0	0	0.059722	0
ENSG00000165272	AQP3	protein_coding	30.2479	47.0477	27.3567	59.5771	26.0204	59.4318
ENSG00000165269	AQP7	protein_coding	0.206323	0.242099	0.117814	0.149518	0.266867	0.456585
ENSG00000103375	AQP8	protein_coding	0.631953	0.431288	0.644695	0.248816	0.427164	0.227891
ENSG00000103569	AQP9	protein_coding	0.529579	0.823695	0.392353	3.59298	0.522738	0.710963
ENSG00000021776	AQR	protein_coding	17.4767	13.6197	16.1516	9.60885	14.4534	14.2729
ENSG00000169083	AR	protein_coding	0.05409	0.172602	0	0.093155	0.120078	0.091901
ENSG00000078061	ARAF	protein_coding	33.1833	37.1051	37.5356	39.4879	40.9228	43.9433
ENSG00000186635	ARAP1	protein_coding	44.5773	45.1277	41.6841	105.046	50.4888	56.4364
ENSG00000047365	ARAP2	protein_coding	53.0458	47.1615	42.2941	45.6548	41.9659	48.9394
ENSG00000120318	ARAP3	protein_coding	0.772884	0.788836	0.718104	3.96688	0.672745	0.961643
ENSG00000198576	ARC	protein_coding	0	0.03788	0.18836	0.078109	0.090179	0.01922
ENSG00000095139	ARCN1	protein_coding	22.6524	28.8648	22.7757	21.6426	23.504	25.9332
ENSG00000109321	AREG	protein_coding	3.07195	3.8398	3.34473	2.19585	6.48423	1.73961
ENSG00000119682	AREL1	protein_coding	15.4524	14.9067	14.5161	14.8582	14.5386	15.0489
ENSG00000143761	ARF1	protein_coding	90.3373	88.0363	86.6351	97.1533	89.6019	79.5953
ENSG00000134287	ARF3	protein_coding	23.3624	27.7015	19.5556	36.4357	23.6401	26.6432
ENSG00000168374	ARF4	protein_coding	18.9106	18.7368	13.188	22.8004	18.7458	21.4595
ENSG00000004059	ARF5	protein_coding	38.5094	43.7832	34.2842	54.1729	41.9899	44.0307
ENSG00000165527	ARF6	protein_coding	35.7145	40.827	36.1488	50.1128	34.0187	44.252
ENSG00000101199	ARFGAP1	protein_coding	18.7027	10.5134	21.599	31.1534	19.327	21.7672
ENSG00000149182	ARFGAP2	protein_coding	35.4536	40.7927	37.556	52.7706	33.4995	44.0433
ENSG00000242247	ARFGAP3	protein_coding	15.8969	18.1442	12.7803	14.1107	13.7902	13.8687
ENSG00000066777	ARFGEF1	protein_coding	47.9721	44.7277	50.2403	30.0183	42.0557	46.2211
ENSG00000124198	ARFGEF2	protein_coding	21.0067	18.5978	23.5005	14.5153	22.3244	16.8557
ENSG00000112379	ARFGEF3	protein_coding	0.006553	0	0	0	0	0
ENSG00000164144	ARFIP1	protein_coding	2.07158	1.49531	0.738391	3.18338	1.69671	4.82029
ENSG00000132254	ARFIP2	protein_coding	7.96812	9.296	7.11506	11.3359	8.67781	9.78265
ENSG00000101246	ARFRP1	protein_coding	10.336	7.54894	9.16023	15.6714	8.99619	10.8853
ENSG00000118520	ARG1	protein_coding	0.162931	0.444723	0.257138	0.322408	0.283454	0.106705
ENSG00000081181	ARG2	protein_coding	0.229603	0.547691	0.318749	0.222785	0.911313	0.586778
ENSG00000134884	ARGLU1	protein_coding	36.6088	41.1502	37.5358	35.0741	38.9559	46.7566
ENSG00000175220	ARHGAP1	protein_coding	22.6154	24.0115	24.1219	47.1326	26.3235	32.5007
ENSG00000071205	ARHGAP10	protein_coding	4.29967	4.47111	3.70954	4.22891	6.55526	4.64022
ENSG00000198826	ARHGAP11A	protein_coding	1.34395	1.15918	2.17412	2.79953	3.29964	3.64617
ENSG00000285077	ARHGAP11B	protein_coding	0	0	0	0	0.527225	1.12556
ENSG00000165322	ARHGAP12	protein_coding	14.8882	13.2254	12.3475	7.47178	13.8245	12.6421
ENSG00000075884	ARHGAP15	protein_coding	117.402	113.793	108.308	85.0245	105.294	118.06
ENSG00000140750	ARHGAP17	protein_coding	15.837	15.9002	16.4377	21.9116	17.6431	17.2759
ENSG00000146376	ARHGAP18	protein_coding	2.03164	2.83469	1.427	2.3976	2.68052	2.96798
ENSG00000213390	ARHGAP19	protein_coding	6.01774	5.48997	4.03154	5.99495	5.44176	6.29064
ENSG00000137727	ARHGAP20	protein_coding	0.026753	0.006122	0	0.008991	0.020416	0
ENSG00000107863	ARHGAP21	protein_coding	6.29237	7.21733	7.12567	3.77005	7.52201	4.71063
ENSG00000128805	ARHGAP22	protein_coding	0.059573	0.071939	0.075292	0.527703	0.102367	0.106088
ENSG00000275832	ARHGAP23	protein_coding	0.011229	0.343071	0.068417	0.337945	0.03345	0.109122
ENSG00000138639	ARHGAP24	protein_coding	0.173629	0.018398	0.038253	0.242468	0.345188	0.171278
ENSG00000163219	ARHGAP25	protein_coding	23.0464	29.5706	18.3943	44.1946	23.7315	44.5822
ENSG00000145819	ARHGAP26	protein_coding	22.4837	18.2396	13.7716	23.2103	22.6703	18.6855
ENSG00000159314	ARHGAP27	protein_coding	15.63	18.6553	14.749	48.7515	21.3858	28.2385
ENSG00000137962	ARHGAP29	protein_coding	0.031978	0	0	0.074487	0	0.009308
ENSG00000186517	ARHGAP30	protein_coding	55.7456	65.0954	44.9056	117.129	52.43	93.0583
ENSG00000031081	ARHGAP31	protein_coding	2.14442	2.52024	2.08214	3.28607	1.9551	3.02644
ENSG00000134909	ARHGAP32	protein_coding	1.92609	2.93383	1.60728	1.31073	1.91182	3.34308
ENSG00000004777	ARHGAP33	protein_coding	2.35206	3.00735	2.86802	4.9483	2.79001	4.27252
ENSG00000160007	ARHGAP35	protein_coding	13.5376	13.5452	13.105	19.9321	13.3574	18.0817
ENSG00000147799	ARHGAP39	protein_coding	0.175177	0.217732	0.018207	0.26988	0.139674	0.254194
ENSG00000089820	ARHGAP4	protein_coding	130.635	124.355	140.047	213.541	124.777	170.289
ENSG00000124143	ARHGAP40	protein_coding	0	0.020499	0	0	0	0
ENSG00000165895	ARHGAP42	protein_coding	0.026278	0.127121	0.064096	0.041497	0.090486	0.065411
ENSG00000006740	ARHGAP44	protein_coding	0	0.039655	0.050565	0.027231	0.046397	0.013401
ENSG00000180448	ARHGAP45	protein_coding	241.816	260.238	270.9	397.541	250.387	327.021
ENSG00000100852	ARHGAP5	protein_coding	20.9145	18.5013	20.8107	8.75641	17.6213	14.1289
ENSG00000047648	ARHGAP6	protein_coding	0.111152	0.373484	0.050136	0	0.091028	0
ENSG00000241484	ARHGAP8	protein_coding	0.784636	1.72068	0.391323	0	0.109505	0.397426
ENSG00000123329	ARHGAP9	protein_coding	35.4309	42.271	46.7946	61.9148	43.7728	60.6058
ENSG00000141522	ARHGDIA	protein_coding	86.2964	89.0342	82.8499	131.493	89.9837	95.8476
ENSG00000111348	ARHGDIB	protein_coding	203.591	224.423	185.265	234.947	249.419	257.602
ENSG00000076928	ARHGEF1	protein_coding	281.535	328.578	360.969	677.111	363.744	446.267
ENSG00000104728	ARHGEF10	protein_coding	4.38192	9.63	0.997476	1.32035	0.614112	0.79922
ENSG00000074964	ARHGEF10L	protein_coding	0.186248	0.193675	0.070839	2.04961	0.632999	0.41823
ENSG00000132694	ARHGEF11	protein_coding	2.90369	4.77045	3.73414	5.49399	3.58707	7.37017
ENSG00000196914	ARHGEF12	protein_coding	3.97293	4.23617	2.61043	2.12956	3.68623	3.13877
ENSG00000198844	ARHGEF15	protein_coding	0	0.020225	0	0.039365	0	0
ENSG00000130762	ARHGEF16	protein_coding	0.039653	0	0	0	0.021749	0.018339
ENSG00000110237	ARHGEF17	protein_coding	0.067327	0.010711	0.075501	0.072929	0.025291	0.014358
ENSG00000104880	ARHGEF18	protein_coding	62.9143	20.7233	78.747	95.9608	72.0106	87.3304
ENSG00000142632	ARHGEF19	protein_coding	3.10945	2.60317	1.80396	4.82802	2.16875	5.48121
ENSG00000116584	ARHGEF2	protein_coding	36.284	44.9233	41.54	69.9776	25.748	65.0024
ENSG00000240771	ARHGEF25	protein_coding	0.227042	0.064823	0.06646	0.091438	0.026087	0.161538
ENSG00000114790	ARHGEF26	protein_coding	0.018432	0.078715	0.016276	0.062529	0.081305	0.075205
ENSG00000214944	ARHGEF28	protein_coding	0.048719	0.045999	0.057746	0.540967	0.214399	0.062798
ENSG00000163947	ARHGEF3	protein_coding	37.707	38.9408	35.8222	46.1672	52.2015	59.5973
ENSG00000214694	ARHGEF33	protein_coding	0.015805	0.018598	0	0.065681	0.127236	0.024678
ENSG00000213214	ARHGEF35	protein_coding	2.63635	1.87803	2.48244	2.14098	1.85942	3.53549
ENSG00000183111	ARHGEF37	protein_coding	0	0.178827	0.034427	0	0	0.125144
ENSG00000137135	ARHGEF39	protein_coding	0.152868	0.134854	0.229692	0.235479	0.209026	0.209509
ENSG00000136002	ARHGEF4	protein_coding	0.165055	0.190846	0.23343	0.051048	0.248083	0.112806
ENSG00000165801	ARHGEF40	protein_coding	0.29812	0.435569	0.377689	1.30984	0.708873	0.550708
ENSG00000050327	ARHGEF5	protein_coding	5.0444	5.09923	4.77753	4.86381	6.62991	6.33184
ENSG00000129675	ARHGEF6	protein_coding	35.7412	37.1112	32.0827	35.6808	31.1375	39.5029
ENSG00000102606	ARHGEF7	protein_coding	51.6239	49.0848	55.3355	27.7967	56.0287	44.2957
ENSG00000131089	ARHGEF9	protein_coding	8.65582	6.86463	5.67305	4.61444	6.72088	6.83994
ENSG00000117713	ARID1A	protein_coding	33.522	39.0178	43.0631	45.1571	40.6061	48.3901
ENSG00000049618	ARID1B	protein_coding	72.3465	63.602	87.7686	52.8737	81.5557	64.1771
ENSG00000189079	ARID2	protein_coding	23.1227	24.5679	29.8372	14.2047	23.6996	24.032
ENSG00000116017	ARID3A	protein_coding	1.33101	1.85528	1.61254	6.37091	2.10511	3.95497
ENSG00000179361	ARID3B	protein_coding	11.0505	12.2256	13.0948	13.0447	13.0954	12.5667
ENSG00000205143	ARID3C	protein_coding	0.188358	0.059615	0	0	0.140758	0
ENSG00000032219	ARID4A	protein_coding	19.28	19.8055	21.0375	12.5333	32.3136	16.7269
ENSG00000054267	ARID4B	protein_coding	44.9692	40.5928	57.3535	33.8197	47.3402	39.2443
ENSG00000196843	ARID5A	protein_coding	77.2752	68.2681	104.727	49.7617	77.2993	46.0665
ENSG00000150347	ARID5B	protein_coding	30.9712	30.2461	27.3257	27.1705	30.8741	31.0818
ENSG00000166233	ARIH1	protein_coding	13.1536	11.8553	14.5715	6.71689	12.4101	8.85906
ENSG00000177479	ARIH2	protein_coding	28.048	28.2643	29.0307	32.2737	29.8823	33.4706
ENSG00000221883	ARIH2OS	protein_coding	1.95983	1.66434	1.78975	1.76503	1.19713	1.6074
ENSG00000120805	ARL1	protein_coding	17.2097	13.4281	16.1043	10.1748	15.8062	11.4669
ENSG00000175414	ARL10	protein_coding	6.27236	5.01601	5.59771	4.21944	4.76235	5.68216
ENSG00000152213	ARL11	protein_coding	0.236087	0.539372	0.045487	0.914125	0.322813	0.674786
ENSG00000174225	ARL13A	protein_coding	0	0	0.031712	0.039296	0.022708	0
ENSG00000169379	ARL13B	protein_coding	0.637469	0.970661	0.511353	0.761082	0.533347	1.2676
ENSG00000179674	ARL14	protein_coding	0	0	0	0.044487	0	0
ENSG00000152219	ARL14EP	protein_coding	22.6766	16.9815	21.8889	9.66697	13.011	12.601
ENSG00000268223	ARL14EPL	protein_coding	0	0	0	0	0	0.014816
ENSG00000185305	ARL15	protein_coding	8.98272	6.8168	7.12017	5.84996	6.74913	6.46286
ENSG00000214087	ARL16	protein_coding	11.0438	13.5774	9.72987	15.7286	11.0736	16.6514
ENSG00000185829	ARL17A	protein_coding	14.0792	21.7828	8.57839	13.8031	9.97528	13.3889
ENSG00000228696	ARL17B	protein_coding	19.1944	25.9644	15.9107	18.5896	11.8787	16.9824
ENSG00000213465	ARL2	protein_coding	4.72088	4.23007	4.29644	6.39146	4.4275	6.65334
ENSG00000102931	ARL2BP	protein_coding	27.8359	27.3709	20.3956	10.3153	22.0531	22.0509
ENSG00000138175	ARL3	protein_coding	1.13263	1.24858	0.718047	0.952898	0.715202	1.49307
ENSG00000122644	ARL4A	protein_coding	7.19565	4.59731	3.30314	8.34287	9.45518	6.36557
ENSG00000188042	ARL4C	protein_coding	133.104	120.595	128.59	153.887	115.32	112.013
ENSG00000175906	ARL4D	protein_coding	0.422332	0.671051	0.391532	0.632447	0.082597	0.542339
ENSG00000162980	ARL5A	protein_coding	14.3147	13.1821	11.9131	11.2072	14.7255	14.9117
ENSG00000165997	ARL5B	protein_coding	11.6049	11.1514	13.1532	6.15524	11.0831	8.51622
ENSG00000141748	ARL5C	protein_coding	0	0.187963	0	0.130154	0	0.029495
ENSG00000113966	ARL6	protein_coding	0.913492	0.916374	0.751965	0.669367	1.0306	1.19156
ENSG00000170540	ARL6IP1	protein_coding	55.6585	46.6998	44.0431	43.4051	48.2125	45.5327
ENSG00000182196	ARL6IP4	protein_coding	7.0174	6.94448	7.35017	10.1901	8.25366	7.44044
ENSG00000144746	ARL6IP5	protein_coding	58.8157	50.9571	38.2137	54.3253	43.61	63.0093
ENSG00000177917	ARL6IP6	protein_coding	4.5028	5.12814	3.68435	6.50906	3.9073	7.11308
ENSG00000143862	ARL8A	protein_coding	12.0126	14.4459	16.0182	15.6658	14.2442	14.457
ENSG00000134108	ARL8B	protein_coding	26.8929	24.5144	29.5065	19.0932	26.3562	19.1328
ENSG00000196503	ARL9	protein_coding	0.155331	0.397189	0.145553	0.092698	0.245288	0.125054
ENSG00000104442	ARMC1	protein_coding	10.4142	8.33183	9.59481	7.67591	7.77609	9.5015
ENSG00000170632	ARMC10	protein_coding	5.30881	5.19374	4.66063	8.6813	5.48792	7.93143
ENSG00000157343	ARMC12	protein_coding	0.426512	1.44179	0.823964	0.567832	0.901581	0.718157
ENSG00000118690	ARMC2	protein_coding	3.01368	3.17018	2.54501	3.73721	2.32173	4.64882
ENSG00000165309	ARMC3	protein_coding	0.068784	0.11785	0	0	0	0
ENSG00000169126	ARMC4	protein_coding	0.045549	0.023392	0	0	0	0
ENSG00000140691	ARMC5	protein_coding	2.40545	2.3039	2.45716	4.70462	3.17895	3.64159
ENSG00000105676	ARMC6	protein_coding	4.97509	5.40666	5.0997	9.19686	6.92112	8.80542
ENSG00000125449	ARMC7	protein_coding	2.93906	4.30825	3.85454	6.23606	3.84218	6.02672
ENSG00000114098	ARMC8	protein_coding	34.7553	33.6981	34.6764	27.861	37.2081	30.2335
ENSG00000135931	ARMC9	protein_coding	0.016928	0.080728	0.537817	0.268018	0.61441	0.320221
ENSG00000126947	ARMCX1	protein_coding	0.019393	0.157153	0.258292	0.26704	0.310425	0.05284
ENSG00000184867	ARMCX2	protein_coding	0.919699	1.26048	0.602222	1.14085	1.05573	1.94007
ENSG00000102401	ARMCX3	protein_coding	10.6222	10.3756	6.44479	10.2009	11.0467	10.8024
ENSG00000196440	ARMCX4	protein_coding	1.48974	1.35352	2.32005	0.937939	2.12593	1.36176
ENSG00000125962	ARMCX5	protein_coding	7.24329	3.6482	9.90187	5.48501	4.44942	3.36258
ENSG00000198960	ARMCX6	protein_coding	5.94484	5.34615	5.0724	5.97722	4.81171	6.45631
ENSG00000198520	ARMH1	protein_coding	7.61133	8.28247	4.20478	9.43775	6.94914	9.82741
ENSG00000260286	ARMH2	protein_coding	1.63855	2.6561	1.20047	1.47793	2.07352	3.08411
ENSG00000120029	ARMH3	protein_coding	13.3732	15.8159	11.9789	15.0141	14.7522	18.8
ENSG00000139971	ARMH4	protein_coding	0	0	0.013166	0	0	0.026141
ENSG00000254636	ARMS2	protein_coding	0	0	0.209086	0	0	0
ENSG00000146476	ARMT1	protein_coding	2.90047	3.87966	2.4787	5.47374	3.46483	5.14978
ENSG00000143437	ARNT	protein_coding	10.3659	10.6178	10.675	11.5557	10.8383	12.745
ENSG00000172379	ARNT2	protein_coding	0	0	0	0	0	0.016938
ENSG00000133794	ARNTL	protein_coding	34.8407	26.2406	33.3138	14.5723	48.1044	20.1113
ENSG00000029153	ARNTL2	protein_coding	0.043105	0.159991	0.13654	0.877595	0.670079	0.303953
ENSG00000241685	ARPC1A	protein_coding	18.4513	17.1755	19.5692	21.3575	22.0529	18.5662
ENSG00000130429	ARPC1B	protein_coding	53.3641	61.804	41.6357	149.453	50.1133	74.6837
ENSG00000163466	ARPC2	protein_coding	136.582	125.131	132.336	122.14	132.058	130.691
ENSG00000111229	ARPC3	protein_coding	47.5333	48.7107	38.2603	62.1673	46.1039	55.4973
ENSG00000241553	ARPC4	protein_coding	53.023	46.5418	48.0437	78.2483	56.6292	52.0509
ENSG00000250151	ARPC4-TTLL3	protein_coding	2.23556	1.40917	2.72251	1.7712	1.16212	2.45037
ENSG00000162704	ARPC5	protein_coding	11.8802	12.0067	7.01109	16.6867	8.74607	13.8926
ENSG00000136950	ARPC5L	protein_coding	15.6886	14.7343	17.1395	17.18	12.6558	18.598
ENSG00000242498	ARPIN	protein_coding	0.135306	0.195006	0.083568	0.817631	0.188467	0.522533
ENSG00000128989	ARPP19	protein_coding	43.1441	53.7997	47.1216	33.5424	55.6657	39.6609
ENSG00000172995	ARPP21	protein_coding	0	0.152407	0	0	0.048053	0.047276
ENSG00000120500	ARR3	protein_coding	0.049899	0.043373	0	0	0.018724	0.02489
ENSG00000137486	ARRB1	protein_coding	14.3683	13.6997	13.9275	23.7116	13.4413	12.6223
ENSG00000141480	ARRB2	protein_coding	41.5982	47.8731	54.7917	81.504	59.0862	58.3637
ENSG00000197070	ARRDC1	protein_coding	14.1637	16.2217	14.8186	30.5545	19.7688	29.1809
ENSG00000105643	ARRDC2	protein_coding	65.1748	70.3372	64.1079	70.0488	72.9755	59.1629
ENSG00000113369	ARRDC3	protein_coding	39.4089	34.1939	36.003	21.5841	49.6072	24.5248
ENSG00000140450	ARRDC4	protein_coding	2.88812	2.02577	2.15323	1.34145	3.22195	2.16934
ENSG00000205784	ARRDC5	protein_coding	4.20796	5.77393	5.82255	5.34828	5.12266	8.28011
ENSG00000100299	ARSA	protein_coding	16.1489	20.4235	21.0572	36.9465	21.3146	26.6287
ENSG00000113273	ARSB	protein_coding	4.05425	4.06601	3.51161	4.34435	4.72983	4.8469
ENSG00000006756	ARSD	protein_coding	1.25134	1.41319	1.02167	2.55498	1.29076	1.627
ENSG00000141337	ARSG	protein_coding	4.06422	8.03237	6.90201	6.69371	4.69932	9.3281
ENSG00000183876	ARSI	protein_coding	0.134396	0	0.400181	0	0.38866	0
ENSG00000180801	ARSJ	protein_coding	0.031261	0.044373	0.06427	0	0	0
ENSG00000164291	ARSK	protein_coding	1.40026	1.28479	0.962607	1.93744	1.66977	2.35637
ENSG00000129744	ART1	protein_coding	0	0.128226	0	0	0	0
ENSG00000156219	ART3	protein_coding	0	0	0	0	0	0
ENSG00000111339	ART4	protein_coding	0	0	0	0	0.012884	0
ENSG00000167311	ART5	protein_coding	0	0	0	0.038276	0	0
ENSG00000117407	ARTN	protein_coding	0.488526	0.073265	0.184906	0.221443	0.334712	0.192426
ENSG00000173409	ARV1	protein_coding	2.58031	2.73884	1.44346	4.37021	1.925	5.22662
ENSG00000099889	ARVCF	protein_coding	0.371461	0.444254	0.518189	0.704738	0.381748	0.461071
ENSG00000004848	ARX	protein_coding	0	0	0	0	0	0
ENSG00000214435	AS3MT	protein_coding	0.654019	0.842045	0.952328	0.723374	0.72344	1.34875
ENSG00000104763	ASAH1	protein_coding	24.5936	19.5444	14.9553	30.3424	22.5991	23.9614
ENSG00000188611	ASAH2	protein_coding	0.258062	0.620278	0.428678	0.201584	0.292913	0.220187
ENSG00000204147	ASAH2B	protein_coding	0.871035	0.725511	0.920936	0.393201	1.04051	1.01737
ENSG00000153317	ASAP1	protein_coding	9.67408	15.4843	16.0344	13.0584	14.2948	12.683
ENSG00000151693	ASAP2	protein_coding	0.194569	0.439006	0.051387	0.717237	0.328592	0.16786
ENSG00000088280	ASAP3	protein_coding	0.336841	0.332621	0.22174	0.286538	0.217458	0.353447
ENSG00000065802	ASB1	protein_coding	6.76785	6.04849	8.16153	7.29875	6.558	6.78657
ENSG00000165192	ASB11	protein_coding	0	0.041128	0	0	0	0.016786
ENSG00000198881	ASB12	protein_coding	0.145717	0.255051	0.235346	0	0.178698	0.035714
ENSG00000196372	ASB13	protein_coding	2.26668	2.34293	1.86082	2.98476	1.83579	3.77538
ENSG00000239388	ASB14	protein_coding	0.182538	0.137844	0.348337	0.072434	0.244261	0.088041
ENSG00000146809	ASB15	protein_coding	0.061083	0	0.100372	0	0	0
ENSG00000161664	ASB16	protein_coding	1.01267	1.05417	0.849776	1.14884	0.677745	0.681065
ENSG00000100628	ASB2	protein_coding	0.24218	0.406217	0.350138	3.64469	0.799654	1.4922
ENSG00000115239	ASB3	protein_coding	17.0182	16.3211	16.0502	10.6381	14.0099	15.4588
ENSG00000164122	ASB5	protein_coding	0	0	0	0	0.020239	0
ENSG00000148331	ASB6	protein_coding	13.4688	16.4654	15.4951	22.0931	13.3914	17.0847
ENSG00000183475	ASB7	protein_coding	12.2215	11.2087	12.5804	10.0496	10.7229	9.48669
ENSG00000177981	ASB8	protein_coding	36.4251	38.0235	40.5423	25.8386	32.1619	25.6183
ENSG00000102048	ASB9	protein_coding	0.351315	0.14785	0.087844	0.114818	0.049693	0.087205
ENSG00000138303	ASCC1	protein_coding	7.36358	8.2028	8.35869	6.4408	8.65495	9.00136
ENSG00000100325	ASCC2	protein_coding	11.5788	16.0377	12.9282	14.2125	14.0358	18.165
ENSG00000112249	ASCC3	protein_coding	20.7207	19.3799	20.3932	14.5416	20.4381	21.1675
ENSG00000183734	ASCL2	protein_coding	1.01858	0.481291	0.39064	3.47265	0.898063	1.92168
ENSG00000176009	ASCL3	protein_coding	0	0	0	0	0.10517	0
ENSG00000187855	ASCL4	protein_coding	0	0	0	0	0	0
ENSG00000232237	ASCL5	protein_coding	0	0.237144	0	0.220942	0.187373	0.079802
ENSG00000111875	ASF1A	protein_coding	11.8646	12.1753	9.38088	9.41193	8.10872	11.0308
ENSG00000105011	ASF1B	protein_coding	0.40214	1.21732	0.33826	3.58264	1.3476	2.03548
ENSG00000141505	ASGR1	protein_coding	0.06374	0.256366	0.154098	0.742025	0.464029	0.335836
ENSG00000161944	ASGR2	protein_coding	0.402488	0.211983	0	0.670612	0.473597	0.180043
ENSG00000116539	ASH1L	protein_coding	31.6085	30.9035	33.32	20.5624	32.3586	33.196
ENSG00000129691	ASH2L	protein_coding	12.2023	11.9481	9.95646	12.7563	10.9634	13.0553
ENSG00000110881	ASIC1	protein_coding	0.117209	0.496589	0.342842	0.247516	0.226261	0.097553
ENSG00000213199	ASIC3	protein_coding	1.92035	2.29148	2.53178	3.6806	2.87083	3.00926
ENSG00000072182	ASIC4	protein_coding	0.097581	0.10995	0.075403	0.049187	0.098651	0.049748
ENSG00000101440	ASIP	protein_coding	0	0	0	0.098236	0	0
ENSG00000126522	ASL	protein_coding	4.1106	4.85356	4.28853	8.60069	4.51057	5.22158
ENSG00000196433	ASMT	protein_coding	0.2524	0.227886	0.172297	0.505819	0.175082	0.285024
ENSG00000169093	ASMTL	protein_coding	15.1308	13.6057	15.9252	16.542	14.2804	14.6027
ENSG00000198356	ASNA1	protein_coding	9.10551	9.86851	7.09351	15.6936	9.64918	13.2152
ENSG00000070669	ASNS	protein_coding	13.148	11.8105	15.6957	13.5701	11.9165	11.6799
ENSG00000138381	ASNSD1	protein_coding	14.4568	15.7592	14.0365	11.1446	9.37345	13.1761
ENSG00000204653	ASPDH	protein_coding	0.612225	0.512039	0.748488	0.361743	0.466124	0.119452
ENSG00000166183	ASPG	protein_coding	0	0	0.051039	0	0	0.034923
ENSG00000198363	ASPH	protein_coding	9.86946	9.03273	9.2263	4.32835	8.53239	7.58368
ENSG00000174939	ASPHD1	protein_coding	0.249324	0	0	0	0.167413	0
ENSG00000128203	ASPHD2	protein_coding	1.00141	1.3408	1.09878	3.93352	1.75161	2.53709
ENSG00000066279	ASPM	protein_coding	0.466717	0.666844	0.587844	0.891579	0.757178	0.976793
ENSG00000106819	ASPN	protein_coding	0.038239	0	0.065272	0	0.076204	0
ENSG00000244617	ASPRV1	protein_coding	2.04601	1.58135	1.81769	1.79654	1.79943	2.20364
ENSG00000169696	ASPSCR1	protein_coding	8.51012	9.97641	8.79525	21.5202	13.1472	16.5226
ENSG00000162174	ASRGL1	protein_coding	0.170648	0.274862	0.150689	0.326351	0.5424	0.348198
ENSG00000130707	ASS1	protein_coding	0.264517	0.267564	0.238532	0	0	0.055329
ENSG00000034533	ASTE1	protein_coding	15.6476	12.3711	10.2366	5.78704	9.27372	6.72468
ENSG00000188886	ASTL	protein_coding	1.09468	1.18564	0.864022	1.29388	1.07711	0.954737
ENSG00000148219	ASTN2	protein_coding	2.58904	4.74247	4.57627	3.35988	3.12943	3.04774
ENSG00000171456	ASXL1	protein_coding	60.1012	71.1059	69.2749	54.0841	67.6857	61.9123
ENSG00000143970	ASXL2	protein_coding	3.98314	8.28679	5.79228	8.83059	6.40384	11.7303
ENSG00000138138	ATAD1	protein_coding	19.0181	16.5313	22.9418	11.4555	15.2854	20.2572
ENSG00000156802	ATAD2	protein_coding	12.7041	11.4136	13.6874	6.89821	14.2081	9.15945
ENSG00000119778	ATAD2B	protein_coding	30.8341	29.8302	34.768	24.932	32.0966	24.8365
ENSG00000197785	ATAD3A	protein_coding	2.9628	3.7559	4.00318	8.86459	3.48397	5.80752
ENSG00000160072	ATAD3B	protein_coding	10.3083	10.9893	11.9548	16.0952	13.0439	15.025
ENSG00000215915	ATAD3C	protein_coding	0.079647	0.233238	0.284985	0.254061	0.077631	0.202906
ENSG00000176208	ATAD5	protein_coding	2.66505	2.67787	3.18065	2.1281	3.11785	2.81724
ENSG00000137343	ATAT1	protein_coding	2.08848	1.3961	1.47721	1.90581	1.79215	2.62774
ENSG00000107669	ATE1	protein_coding	8.12555	9.78855	8.608	7.99906	9.53849	8.0235
ENSG00000123268	ATF1	protein_coding	6.54977	6.70357	5.09614	7.38776	9.68763	10.4728
ENSG00000115966	ATF2	protein_coding	19.0404	17.7676	21.8382	13.3418	17.9847	27.2614
ENSG00000162772	ATF3	protein_coding	0.977953	0.480105	0.357625	5.46083	1.3454	1.60338
ENSG00000128272	ATF4	protein_coding	83.7495	79.8902	77.3653	66.7979	84.8347	69.7518
ENSG00000169136	ATF5	protein_coding	5.56994	6.56584	8.25685	7.79788	7.28998	6.20522
ENSG00000118217	ATF6	protein_coding	15.4246	15.8959	12.0387	9.28937	12.4133	17.1452
ENSG00000213676	ATF6B	protein_coding	21.0283	20.956	23.9638	35.4356	20.6673	28.2767
ENSG00000170653	ATF7	protein_coding	9.15508	5.92989	8.01197	11.3062	9.2103	13.3246
ENSG00000171681	ATF7IP	protein_coding	68.0518	48.0132	43.4789	57.1097	48.7626	54.9591
ENSG00000166669	ATF7IP2	protein_coding	17.9311	21.676	25.2059	14.8915	16.9623	18.9863
ENSG00000152348	ATG10	protein_coding	4.3664	3.0543	6.26606	6.27451	5.18623	4.64879
ENSG00000123395	ATG101	protein_coding	2.05637	4.15854	1.98337	11.3978	4.45943	7.00173
ENSG00000145782	ATG12	protein_coding	12.1165	11.3594	10.0102	7.18416	10.8255	10.2095
ENSG00000175224	ATG13	protein_coding	34.6301	30.0875	33.5373	37.1875	38.0909	35.4013
ENSG00000126775	ATG14	protein_coding	16.4933	15.0837	17.9935	9.79869	17.3633	11.2977
ENSG00000085978	ATG16L1	protein_coding	39.9356	34.4325	42.3537	25.7111	43.898	27.9919
ENSG00000168010	ATG16L2	protein_coding	33.0631	43.7751	43.0863	86.7344	43.2118	60.6026
ENSG00000110046	ATG2A	protein_coding	34.9128	28.1668	43.5035	47.6139	48.0576	28.8643
ENSG00000066739	ATG2B	protein_coding	12.679	11.3749	14.3722	8.31676	12.1977	10.8378
ENSG00000144848	ATG3	protein_coding	15.423	15.3709	12.7095	30.7054	16.4813	18.6268
ENSG00000101844	ATG4A	protein_coding	2.06253	3.23148	2.69073	3.71822	2.24533	3.2303
ENSG00000168397	ATG4B	protein_coding	22.4951	21.4974	24.8186	30.6272	21.2437	32.5977
ENSG00000125703	ATG4C	protein_coding	2.12687	2.31456	1.93375	2.17618	1.72593	3.89442
ENSG00000130734	ATG4D	protein_coding	24.2426	24.4097	28.3712	28.9356	30.5042	21.1562
ENSG00000057663	ATG5	protein_coding	15.5213	14.7122	13.8518	11.0354	14.7604	14.1819
ENSG00000197548	ATG7	protein_coding	22.8647	17.7604	22.0961	22.9267	21.9819	28.6437
ENSG00000198925	ATG9A	protein_coding	22.8313	21.136	23.4348	25.2172	27.9585	21.7449
ENSG00000181652	ATG9B	protein_coding	0.740895	1.80897	1.30967	2.45053	1.40676	2.00826
ENSG00000138363	ATIC	protein_coding	19.8313	15.9024	14.8799	17.8718	14.8984	21.2428
ENSG00000198513	ATL1	protein_coding	1.12985	0.785836	0.341854	0.715959	1.36697	0.683883
ENSG00000119787	ATL2	protein_coding	22.2103	18.091	19.5129	15.0042	23.0529	18.1998
ENSG00000184743	ATL3	protein_coding	17.1629	17.2031	14.313	18.405	15.0442	16.6243
ENSG00000149311	ATM	protein_coding	161.516	162.171	144.74	110.582	167.911	180.966
ENSG00000166454	ATMIN	protein_coding	14.0274	13.9018	12.8028	14.5774	12.3886	12.5565
ENSG00000111676	ATN1	protein_coding	10.5055	9.85332	12.8131	11.4143	12.4718	11.8312
ENSG00000179774	ATOH7	protein_coding	0.065871	0.056835	0	0	0.022041	0
ENSG00000177556	ATOX1	protein_coding	15.1474	12.584	14.3333	14.9257	13.2162	12.0557
ENSG00000206190	ATP10A	protein_coding	15.8291	15.4862	22.9057	19.1102	11.8429	22.3855
ENSG00000118322	ATP10B	protein_coding	0	0.011118	0	0	0	0.007489
ENSG00000145246	ATP10D	protein_coding	1.11609	0.967377	0.465934	2.84471	1.47343	1.30782
ENSG00000068650	ATP11A	protein_coding	17.2428	19.4216	22.4259	22.2093	22.7822	21.7991
ENSG00000058063	ATP11B	protein_coding	54.2291	51.4361	54.573	26.0304	58.814	39.3514
ENSG00000101974	ATP11C	protein_coding	11.1999	8.8083	10.0418	6.25746	7.61422	8.7356
ENSG00000075673	ATP12A	protein_coding	0	0	0	0	0	0
ENSG00000105726	ATP13A1	protein_coding	22.6611	25.5558	29.3288	37.0574	28.8106	32.5623
ENSG00000159363	ATP13A2	protein_coding	15.1077	11.1745	11.0504	21.9733	16.0822	18.1409
ENSG00000133657	ATP13A3	protein_coding	24.6276	22.3605	25.0328	20.4007	25.0796	22.9428
ENSG00000127249	ATP13A4	protein_coding	1.09338	1.25734	0.798602	0.41795	0.939296	0.62231
ENSG00000187527	ATP13A5	protein_coding	0	0	0	0	0	0.012854
ENSG00000163399	ATP1A1	protein_coding	89.5928	94.208	80.8858	81.1334	81.7917	94.7151
ENSG00000018625	ATP1A2	protein_coding	0	0	0	0.041476	0	0.009634
ENSG00000105409	ATP1A3	protein_coding	1.45481	1.49391	1.78775	1.99706	2.23279	1.48738
ENSG00000132681	ATP1A4	protein_coding	0	0	0	0.375017	0.026268	0.009821
ENSG00000143153	ATP1B1	protein_coding	1.49118	1.76751	0.741662	2.66408	1.40745	1.4508
ENSG00000129244	ATP1B2	protein_coding	0.030919	0.040285	0.114373	0.014258	0.050237	0.103956
ENSG00000069849	ATP1B3	protein_coding	16.6359	17.0764	18.972	25.6704	23.9783	19.6584
ENSG00000166896	ATP23	protein_coding	1.51049	1.6357	2.0217	1.91896	0.613504	2.10966
ENSG00000196296	ATP2A1	protein_coding	0.18153	0.212278	0.763051	0.443386	0.521242	0.282873
ENSG00000174437	ATP2A2	protein_coding	33.7993	32.3219	33.7017	36.9328	35.9902	35.0868
ENSG00000074370	ATP2A3	protein_coding	76.3789	78.5148	85.338	112.945	77.77	92.2715
ENSG00000070961	ATP2B1	protein_coding	40.2112	29.8048	30.3731	28.7578	39.7608	30.5347
ENSG00000157087	ATP2B2	protein_coding	0	0	0.011411	0.006423	0.058463	0.04411
ENSG00000067842	ATP2B3	protein_coding	0	0	0	0.008538	0.007238	0.008404
ENSG00000058668	ATP2B4	protein_coding	34.7007	32.8006	22.1542	39.304	32.3649	52.7372
ENSG00000017260	ATP2C1	protein_coding	23.437	20.1738	17.4881	26.9922	21.5542	23.944
ENSG00000064270	ATP2C2	protein_coding	0	0.072681	0	0.015396	0.007489	0.023456
ENSG00000105675	ATP4A	protein_coding	0	0	0.023056	0.00714	0	0
ENSG00000152234	ATP5F1A	protein_coding	63.6166	63.5097	57.1811	57.4381	56.4903	38.8644
ENSG00000110955	ATP5F1B	protein_coding	95.9324	89.2662	82.7908	101.641	84.3388	92.8752
ENSG00000165629	ATP5F1C	protein_coding	48.3173	47.1816	43.643	47.6853	45.5664	42.766
ENSG00000099624	ATP5F1D	protein_coding	41.3822	41.1623	25.1563	68.6003	30.8966	33.3308
ENSG00000124172	ATP5F1E	protein_coding	16.627	17.5788	16.2155	20.6154	19.1836	17.4424
ENSG00000130770	ATP5IF1	protein_coding	5.80586	9.55795	11.4998	9.09721	10.2631	9.6034
ENSG00000159199	ATP5MC1	protein_coding	9.36431	12.6897	6.82373	12.6559	9.70774	9.75924
ENSG00000135390	ATP5MC2	protein_coding	42.3974	52.8688	70.4845	106.188	68.7432	72.5502
ENSG00000154518	ATP5MC3	protein_coding	10.5877	9.1748	9.71656	39.9347	9.49947	8.16839
ENSG00000173915	ATP5MD	protein_coding	64.666	51.7965	43.8381	62.5902	49.2009	56.2603
ENSG00000169020	ATP5ME	protein_coding	4.39636	5.67304	5.73778	8.26252	6.23201	8.94179
ENSG00000241468	ATP5MF	protein_coding	12.8318	15.3361	13.264	26.1337	11.5151	23.6276
ENSG00000248919	ATP5MF-PTCD1	protein_coding	0	0	0	0	0	0
ENSG00000167283	ATP5MG	protein_coding	14.7553	15.9814	14.5823	19.4421	15.568	14.5899
ENSG00000249222	ATP5MGL	protein_coding	3.2476	2.17432	4.09029	3.58801	2.35963	4.85396
ENSG00000156411	ATP5MPL	protein_coding	16.1251	19.0208	13.6682	20.4123	18.9816	19.2072
ENSG00000116459	ATP5PB	protein_coding	17.4069	16.9626	14.2779	19.2819	15.3233	18.3325
ENSG00000167863	ATP5PD	protein_coding	28.4474	25.912	26.5247	47.3137	24.18	35.5531
ENSG00000154723	ATP5PF	protein_coding	5.20857	7.7281	4.42334	7.76209	6.09256	8.00264
ENSG00000241837	ATP5PO	protein_coding	49.3451	48.5558	46.7008	48.4195	40.4396	43.6928
ENSG00000125375	ATP5S	protein_coding	8.24282	6.79274	6.88299	8.2898	5.40121	7.1958
ENSG00000071553	ATP6AP1	protein_coding	16.5069	19.8125	16.4892	17.9017	18.0582	21.8034
ENSG00000205464	ATP6AP1L	protein_coding	0.158623	0.349034	0.295093	0.138668	0.268001	0.173432
ENSG00000182220	ATP6AP2	protein_coding	27.6254	29.9573	22.0002	20.6618	20.9283	27.4604
ENSG00000033627	ATP6V0A1	protein_coding	2.23393	2.92207	2.4253	3.96141	3.04614	3.40799
ENSG00000185344	ATP6V0A2	protein_coding	18.0243	17.2446	21.6288	15.3685	18.6639	16.4426
ENSG00000105929	ATP6V0A4	protein_coding	0	0	0	0	0.021229	0
ENSG00000117410	ATP6V0B	protein_coding	22.7771	20.0069	16.1496	45.384	24.3137	25.031
ENSG00000185883	ATP6V0C	protein_coding	50.0274	59.1137	55.7469	83.4894	60.618	58.5797
ENSG00000159720	ATP6V0D1	protein_coding	10.5149	12.3406	10.3511	26.4057	15.1644	13.4859
ENSG00000113732	ATP6V0E1	protein_coding	19.6261	18.8964	12.1917	23.4002	14.7269	22.607
ENSG00000171130	ATP6V0E2	protein_coding	12.9037	9.88469	11.6595	23.2182	16.8338	26.8265
ENSG00000114573	ATP6V1A	protein_coding	6.03607	5.56965	4.67212	9.46462	7.16032	8.14914
ENSG00000116039	ATP6V1B1	protein_coding	0.062555	0	0	0.061969	0	0
ENSG00000147416	ATP6V1B2	protein_coding	14.9764	15.4699	13.3131	24.0588	14.1662	18.0684
ENSG00000155097	ATP6V1C1	protein_coding	6.74078	7.00533	5.63253	6.50021	5.78166	8.58548
ENSG00000143882	ATP6V1C2	protein_coding	0.25048	0.345169	0.232766	0.351399	0.350761	0.098267
ENSG00000100554	ATP6V1D	protein_coding	10.259	10.3687	6.52295	8.74256	13.3056	11.874
ENSG00000131100	ATP6V1E1	protein_coding	24.4349	22.0601	25.6415	24.204	22.3865	17.4497
ENSG00000250565	ATP6V1E2	protein_coding	1.35689	1.71382	2.66554	1.78205	2.10227	1.85296
ENSG00000128524	ATP6V1F	protein_coding	23.0364	20.3428	16.1403	29.145	16.662	24.8576
ENSG00000272899	ATP6V1FNB	protein_coding	0.584884	0.35998	0.405982	0.61076	0.368531	0.303482
ENSG00000136888	ATP6V1G1	protein_coding	47.3379	47.9253	46.0359	34.7941	44.6036	36.6586
ENSG00000213760	ATP6V1G2	protein_coding	1.69186	1.72079	1.19401	1.49933	1.10898	1.54609
ENSG00000047249	ATP6V1H	protein_coding	20.6306	19.2966	17.9139	20.9988	20.1799	17.9612
ENSG00000165240	ATP7A	protein_coding	5.92563	5.99077	6.98114	4.45217	6.92987	6.26365
ENSG00000123191	ATP7B	protein_coding	0.404785	0.443867	0.13804	0.273788	0.314794	0.342415
ENSG00000124406	ATP8A1	protein_coding	34.055	36.7839	29.5691	14.458	42.6626	17.809
ENSG00000132932	ATP8A2	protein_coding	0.075955	0.190128	0.079904	0.179804	0.118197	0.160302
ENSG00000081923	ATP8B1	protein_coding	0.134724	0.1347	0.043269	0.187546	0.054637	0.219892
ENSG00000143515	ATP8B2	protein_coding	51.3709	63.258	56.5886	78.2916	46.8718	79.7198
ENSG00000130270	ATP8B3	protein_coding	0.230862	0.465167	0.829969	0.699494	0.764808	0.706889
ENSG00000104043	ATP8B4	protein_coding	0.508596	0.488014	0.341672	1.1302	0.513481	0.785799
ENSG00000054793	ATP9A	protein_coding	0.440748	0.412185	0.313418	0.343986	0.205287	0.334678
ENSG00000166377	ATP9B	protein_coding	30.1698	28.5317	30.3184	23.1227	26.0387	26.5277
ENSG00000123472	ATPAF1	protein_coding	5.38289	6.75831	6.96841	6.10217	6.7203	10.3195
ENSG00000171953	ATPAF2	protein_coding	6.85645	6.5803	6.50485	8.76904	7.66031	8.56338
ENSG00000175054	ATR	protein_coding	20.7838	17.3461	18.0644	14.013	18.9171	20.6043
ENSG00000138085	ATRAID	protein_coding	29.9007	28.662	26.0831	23.4407	28.113	23.0867
ENSG00000164053	ATRIP	protein_coding	3.59572	2.94787	3.23894	3.92116	3.45234	3.60542
ENSG00000088812	ATRN	protein_coding	8.76302	7.92824	6.9772	5.56302	6.31256	9.76593
ENSG00000107518	ATRNL1	protein_coding	0	0.009921	0.010086	0	0.183094	0.006682
ENSG00000085224	ATRX	protein_coding	31.7531	31.6051	28.8112	24.2839	30.9958	35.9704
ENSG00000124788	ATXN1	protein_coding	7.76735	10.283	10.5556	11.3407	10.4996	9.91915
ENSG00000130638	ATXN10	protein_coding	22.1273	19.2498	16.0673	20.9403	18.4423	22.3655
ENSG00000224470	ATXN1L	protein_coding	18.1354	17.5498	21.6222	13.4028	21.5826	15.2054
ENSG00000204842	ATXN2	protein_coding	14.1962	8.48947	7.3261	11.5115	9.95285	17.9324
ENSG00000168488	ATXN2L	protein_coding	41.0695	44.4903	59.7174	61.6396	57.3676	62.2673
ENSG00000066427	ATXN3	protein_coding	7.74266	8.92722	7.74658	10.3091	10.7098	10.0986
ENSG00000123594	ATXN3L	protein_coding	0	0	0	0	0	0.026183
ENSG00000163635	ATXN7	protein_coding	34.1208	25.6119	32.0591	19.539	30.7451	20.9712
ENSG00000285258	ATXN7	protein_coding	12.1523	16.3215	18.2416	6.59985	18.1423	10.7414
ENSG00000146776	ATXN7L1	protein_coding	8.48233	11.6904	10.1324	10.7091	11.3469	18.8687
ENSG00000162650	ATXN7L2	protein_coding	2.48822	3.74404	2.04371	4.94723	2.66207	4.90738
ENSG00000087152	ATXN7L3	protein_coding	28.9553	31.0916	29.7595	36.8535	26.3605	32.2683
ENSG00000253719	ATXN7L3B	protein_coding	33.5039	31.4181	31.3072	19.6458	29.4044	23.7719
ENSG00000148090	AUH	protein_coding	8.50315	9.10965	8.08337	7.14263	7.79342	8.80965
ENSG00000127423	AUNIP	protein_coding	0	0.15901	0.320752	0.108005	0.062923	0.053553
ENSG00000115307	AUP1	protein_coding	32.1018	36.5117	32.5936	48.1929	36.9029	41.272
ENSG00000087586	AURKA	protein_coding	0.219783	0.383122	0.183794	1.07504	0.323913	1.02093
ENSG00000175756	AURKAIP1	protein_coding	16.4182	16.6183	14.1864	35.3361	19.4391	21.6413
ENSG00000178999	AURKB	protein_coding	0.601655	1.01792	0.981163	2.44733	0.609589	2.00634
ENSG00000105146	AURKC	protein_coding	0.457439	0.405104	0.852667	0.303368	0.906173	0.401979
ENSG00000158321	AUTS2	protein_coding	8.98156	7.74499	9.36575	6.57308	9.60952	7.60226
ENSG00000169857	AVEN	protein_coding	4.39845	3.05019	4.01801	4.14605	3.82804	4.68706
ENSG00000135407	AVIL	protein_coding	0.384134	0.547165	0.711425	0.588252	0.331024	0.976629
ENSG00000105778	AVL9	protein_coding	9.76195	9.68258	9.30773	9.5895	10.2857	10.4686
ENSG00000119986	AVPI1	protein_coding	3.68634	4.06109	3.90662	2.03676	3.25069	2.44447
ENSG00000166148	AVPR1A	protein_coding	0.09793	0.140546	0	0	0.010606	0
ENSG00000126895	AVPR2	protein_coding	0.616059	3.97424	0.629064	1.59096	0.631242	1.15916
ENSG00000204195	AWAT1	protein_coding	0	0.061623	0.046766	0	0	0
ENSG00000162779	AXDND1	protein_coding	0.10586	0.022261	0.02887	0.034342	0	0.048605
ENSG00000103126	AXIN1	protein_coding	18.0155	19.8478	16.9629	21.7694	18.782	18.8572
ENSG00000168646	AXIN2	protein_coding	15.333	19.1605	16.5784	13.3949	14.235	19.6366
ENSG00000167601	AXL	protein_coding	0.422408	0.459443	0.564743	0.767391	1.28365	0.584428
ENSG00000163512	AZI2	protein_coding	10.0994	9.96523	5.38618	5.71694	5.61967	7.20385
ENSG00000155096	AZIN1	protein_coding	43.3182	43.2101	48.8801	38.559	56.0285	42.035
ENSG00000142920	AZIN2	protein_coding	2.43384	2.04977	1.34834	1.68159	1.88002	2.15299
ENSG00000172232	AZU1	protein_coding	0.190166	0	0.224149	0.194242	0.211406	0.098787
ENSG00000166710	B2M	protein_coding	2333.48	1956.8	1531.37	1674.78	1687.17	1847.05
ENSG00000169255	B3GALNT1	protein_coding	0.119177	0.104746	0.04575	0.047376	0.091436	0.046955
ENSG00000162885	B3GALNT2	protein_coding	3.4661	2.92893	2.68962	4.74674	2.72558	4.85291
ENSG00000172318	B3GALT1	protein_coding	0	0	0	0	0.013069	0
ENSG00000162630	B3GALT2	protein_coding	0.834881	0.517697	0.407147	0.441918	0.449909	0.674925
ENSG00000235863	B3GALT4	protein_coding	9.40936	8.09515	9.21561	10.9463	8.89695	6.79162
ENSG00000183778	B3GALT5	protein_coding	0	0	0	0	0	0
ENSG00000176022	B3GALT6	protein_coding	7.34755	5.85885	6.21462	12.1358	5.77388	7.98308
ENSG00000109956	B3GAT1	protein_coding	2.64725	1.20158	1.074	2.4956	5.44181	4.51742
ENSG00000112309	B3GAT2	protein_coding	0.414192	0.227042	0.243469	0.29723	0.209863	0.185557
ENSG00000149541	B3GAT3	protein_coding	27.0096	27.1364	27.5482	33.7837	32.0094	29.8832
ENSG00000187676	B3GLCT	protein_coding	3.164	2.99782	2.7269	1.46546	2.77064	2.25678
ENSG00000214654	B3GNT10	protein_coding	1.32114	1.52524	1.73637	1.07832	0.986128	1.02264
ENSG00000170340	B3GNT2	protein_coding	10.1057	14.2548	10.2863	14.2729	11.2441	13.1822
ENSG00000179913	B3GNT3	protein_coding	0.043796	0.226602	0.031432	0.174648	0.237461	0.203457
ENSG00000176383	B3GNT4	protein_coding	0.409774	1.01763	0.289808	0.184536	0.684741	0.261855
ENSG00000176597	B3GNT5	protein_coding	0.443062	0.60451	0.722385	0.695703	0.305624	0.375207
ENSG00000198488	B3GNT6	protein_coding	0	0	0	0	0	0.022636
ENSG00000156966	B3GNT7	protein_coding	0.05077	0.190733	0.103838	0.139075	0.143649	0.099375
ENSG00000177191	B3GNT8	protein_coding	0.602905	0.503234	0.898143	1.73137	0.594788	0.85265
ENSG00000237172	B3GNT9	protein_coding	2.15031	1.67021	1.55846	3.56668	2.21522	2.79191
ENSG00000175711	B3GNTL1	protein_coding	3.42019	4.28372	5.71465	8.35237	4.74307	5.58004
ENSG00000135454	B4GALNT1	protein_coding	0	0	0	0.037923	0	0
ENSG00000139044	B4GALNT3	protein_coding	0.175085	0.268122	0.086431	0.071086	0.138831	0.17633
ENSG00000182272	B4GALNT4	protein_coding	0.814781	0.236106	1.05965	0.263248	0.301536	0.627813
ENSG00000086062	B4GALT1	protein_coding	53.987	45.9828	37.8514	35.1239	48.951	35.5165
ENSG00000117411	B4GALT2	protein_coding	0.564267	0.339805	0.421476	1.07874	0.510518	0.790519
ENSG00000158850	B4GALT3	protein_coding	12.4611	14.6697	9.23355	23.3144	11.7852	21.0044
ENSG00000121578	B4GALT4	protein_coding	9.06628	12.1493	20.321	5.56829	28.1305	15.4818
ENSG00000158470	B4GALT5	protein_coding	8.75351	5.36542	5.27787	10.6732	9.67334	7.4886
ENSG00000118276	B4GALT6	protein_coding	0.468649	0.086473	0.134604	0.391996	0.285475	0.185323
ENSG00000027847	B4GALT7	protein_coding	16.3762	12.11	15.076	14.1761	15.3145	12.0673
ENSG00000174684	B4GAT1	protein_coding	1.41058	1.88274	1.29141	1.84961	1.62502	2.12854
ENSG00000108641	B9D1	protein_coding	0.264606	0.808069	0.225193	1.22609	0.951505	0.46917
ENSG00000123810	B9D2	protein_coding	5.33611	5.75626	4.77957	9.76988	5.74977	4.58772
ENSG00000164929	BAALC	protein_coding	0	0	0	0.020334	0	0
ENSG00000136881	BAAT	protein_coding	0.019556	0.024908	0.088631	0	0	0.029798
ENSG00000105393	BABAM1	protein_coding	20.3115	23.9786	23.5097	40.2011	25.4048	25.7976
ENSG00000158019	BABAM2	protein_coding	14.4378	15.1526	15.9346	16.3031	16.1816	21.2407
ENSG00000186318	BACE1	protein_coding	0.408908	0.418783	0.494577	0.832431	0.372435	0.536676
ENSG00000182240	BACE2	protein_coding	0.116438	0.146005	0.082886	0.032039	0.021476	0.006465
ENSG00000156273	BACH1	protein_coding	25.7268	25.8414	23.6078	22.5058	26.736	20.2634
ENSG00000112182	BACH2	protein_coding	34.3998	49.3925	37.862	26.0407	40.4315	35.3137
ENSG00000002330	BAD	protein_coding	11.6463	9.74583	7.73955	17.824	9.02836	7.71115
ENSG00000107262	BAG1	protein_coding	7.8847	10.122	8.64216	13.3565	8.90846	10.8523
ENSG00000112208	BAG2	protein_coding	2.74404	2.23483	2.80219	1.536	2.36217	2.1833
ENSG00000151929	BAG3	protein_coding	9.08906	10.1438	11.6792	8.31825	8.87529	10.095
ENSG00000156735	BAG4	protein_coding	11.3102	11.5507	14.2896	6.4267	15.269	9.54132
ENSG00000166170	BAG5	protein_coding	18.3645	17.4432	16.6041	12.0174	12.7557	13.7552
ENSG00000204463	BAG6	protein_coding	54.1745	40.6964	46.4199	79.2864	50.5712	59.8373
ENSG00000266074	BAHCC1	protein_coding	0.139116	0.295178	0.075691	0.550913	0.447834	0.397841
ENSG00000140320	BAHD1	protein_coding	10.2261	11.0109	9.29804	16.7327	8.85085	15.086
ENSG00000175866	BAIAP2	protein_coding	0.863505	2.05797	1.78423	2.96792	4.22091	3.06404
ENSG00000006453	BAIAP2L1	protein_coding	0.412542	0.640042	0.42038	0.239111	0.555852	0.413526
ENSG00000128298	BAIAP2L2	protein_coding	0.392775	0.067969	0.613133	0.904874	0.764149	0.852655
ENSG00000007516	BAIAP3	protein_coding	1.79602	2.39249	3.00602	1.18314	1.33286	1.4263
ENSG00000030110	BAK1	protein_coding	14.0008	11.928	14.9637	21.4109	15.417	16.5544
ENSG00000095739	BAMBI	protein_coding	0.303842	0.13359	0.136984	0.03067	0	0.028174
ENSG00000175334	BANF1	protein_coding	6.22732	8.28136	5.54917	20.4609	6.96257	16.1201
ENSG00000153064	BANK1	protein_coding	0.614167	0.719866	0.410399	0.367196	1.23552	0.525187
ENSG00000172530	BANP	protein_coding	8.26822	10.7026	12.3012	12.1659	11.6961	13.3131
ENSG00000163930	BAP1	protein_coding	22.8457	21.0687	20.8459	19.0933	21.0516	22.0229
ENSG00000138376	BARD1	protein_coding	3.19371	2.69931	3.25879	3.86548	4.48714	3.58442
ENSG00000125492	BARHL1	protein_coding	0	0.057321	0.03653	0.067076	0.142189	0
ENSG00000131668	BARX1	protein_coding	0	0	0	0	0	0
ENSG00000176788	BASP1	protein_coding	0.394179	0.62363	0.415001	2.47238	1.48968	0.512386
ENSG00000156127	BATF	protein_coding	5.66166	3.831	3.85317	11.2968	4.33788	7.76153
ENSG00000168062	BATF2	protein_coding	0.045513	0	0	0.842021	0.061018	0.131993
ENSG00000123685	BATF3	protein_coding	0.493414	0.429164	0.523277	2.86188	0.912999	0.53051
ENSG00000087088	BAX	protein_coding	13.3737	16.1253	14.6388	32.8896	16.4911	21.9953
ENSG00000198604	BAZ1A	protein_coding	17.8578	18.3858	21.6801	17.043	17.7075	23.2302
ENSG00000009954	BAZ1B	protein_coding	14.6692	13.3729	16.8967	20.501	14.2198	22.4162
ENSG00000076108	BAZ2A	protein_coding	60.8647	60.6625	66.4888	50.9498	57.5869	65.1483
ENSG00000123636	BAZ2B	protein_coding	9.80026	12.0199	9.55763	7.70457	11.9259	12.5196
ENSG00000105327	BBC3	protein_coding	2.34209	2.79914	2.7331	8.19096	2.86578	5.2105
ENSG00000214413	BBIP1	protein_coding	8.71314	7.90735	8.08892	5.90756	8.5923	8.44049
ENSG00000119636	BBOF1	protein_coding	0.753631	0.412291	0.647834	0.473572	0.780551	0.577441
ENSG00000129151	BBOX1	protein_coding	0	0	0	0	0	0
ENSG00000174483	BBS1	protein_coding	3.63112	3.79817	3.17586	5.16525	3.96754	4.81185
ENSG00000179941	BBS10	protein_coding	2.0569	1.52407	1.50819	1.92529	1.28195	2.62035
ENSG00000181004	BBS12	protein_coding	1.03803	0.730009	0.522408	0.486097	0.726202	0.797061
ENSG00000125124	BBS2	protein_coding	15.9031	15.73	18.6285	9.22479	15.901	18.4924
ENSG00000140463	BBS4	protein_coding	4.59123	5.20661	3.00464	3.53962	3.51341	7.90931
ENSG00000163093	BBS5	protein_coding	0.78629	0.770906	0.572991	0.704314	0.81422	1.0234
ENSG00000138686	BBS7	protein_coding	1.0598	1.66581	1.34232	2.00264	2.41526	2.98116
ENSG00000122507	BBS9	protein_coding	17.833	14.1226	13.9147	8.91449	16.5374	17.8291
ENSG00000114439	BBX	protein_coding	41.1856	38.1685	42.3717	20.3599	29.4016	30.8254
ENSG00000187244	BCAM	protein_coding	0	0.049277	0.025049	0	0	0
ENSG00000132692	BCAN	protein_coding	0	0.024269	0	0.021884	0	0
ENSG00000075790	BCAP29	protein_coding	5.07399	5.52527	4.15863	3.90275	4.52119	4.34403
ENSG00000185825	BCAP31	protein_coding	34.3973	30.8722	20.734	43.8818	25.0822	41.9052
ENSG00000050820	BCAR1	protein_coding	0.129589	0.265348	0.122891	0	0.016381	0.083394
ENSG00000137936	BCAR3	protein_coding	0.303595	0.300896	0.250611	0.292235	0.117113	0.252578
ENSG00000064787	BCAS1	protein_coding	0	0.036599	0	0	0.250681	0
ENSG00000116752	BCAS2	protein_coding	15.602	21.8721	16.3121	12.0785	17.9759	18.0556
ENSG00000141376	BCAS3	protein_coding	11.2194	13.3724	13.3081	12.4844	15.0397	15.8411
ENSG00000124243	BCAS4	protein_coding	9.21089	9.1733	11.1323	5.3137	5.92058	10.1485
ENSG00000060982	BCAT1	protein_coding	0.404566	0.373618	0.188479	2.80255	0.49689	0.779217
ENSG00000105552	BCAT2	protein_coding	5.21517	3.11625	3.27147	6.85189	4.23078	6.26378
ENSG00000107949	BCCIP	protein_coding	20.2342	21.9815	17.1559	14.1029	18.8398	15.4296
ENSG00000186666	BCDIN3D	protein_coding	2.3146	1.27092	1.99537	1.2279	1.42723	1.54093
ENSG00000248098	BCKDHA	protein_coding	7.71864	8.5644	9.22725	12.366	8.32663	7.63873
ENSG00000083123	BCKDHB	protein_coding	4.08036	7.02356	5.16882	5.55702	7.34165	7.83163
ENSG00000103507	BCKDK	protein_coding	3.12799	3.84685	2.43047	9.08721	4.09154	6.04044
ENSG00000142867	BCL10	protein_coding	11.4419	13.3772	12.6195	9.63178	13.5906	9.59642
ENSG00000119866	BCL11A	protein_coding	0.858603	3.82103	1.23013	3.1828	8.7356	5.9168
ENSG00000127152	BCL11B	protein_coding	98.7861	114.691	130.517	82.9297	98.3826	95.8996
ENSG00000171791	BCL2	protein_coding	74.4502	76.3495	79.1315	118.774	96.0676	118.132
ENSG00000140379	BCL2A1	protein_coding	5.13474	6.55759	5.5274	19.469	5.96536	8.89804
ENSG00000171552	BCL2L1	protein_coding	9.04239	9.57361	10.3039	20.6296	8.57329	10.9083
ENSG00000137875	BCL2L10	protein_coding	0.07692	0.067347	0.102701	0.208436	0.247582	0.068678
ENSG00000153094	BCL2L11	protein_coding	6.95808	6.84367	10.2331	10.0578	13.0463	9.24306
ENSG00000126453	BCL2L12	protein_coding	3.40191	5.21134	2.45548	6.89483	4.35618	4.97699
ENSG00000099968	BCL2L13	protein_coding	6.16578	6.7866	5.01245	10.4303	6.29616	8.22706
ENSG00000121380	BCL2L14	protein_coding	1.67421	0.40456	0.90222	2.11929	1.30424	1.20152
ENSG00000188761	BCL2L15	protein_coding	0.596544	0.768873	0.900387	1.33419	0.778491	0.73843
ENSG00000129473	BCL2L2	protein_coding	1.3868	2.44091	1.50972	2.62924	1.78209	1.91953
ENSG00000258643	BCL2L2-PABPN1	protein_coding	0.039651	1.04742	0	0	0	0
ENSG00000069399	BCL3	protein_coding	13.5464	20.8477	25.5594	28.4956	14.5202	14.0151
ENSG00000113916	BCL6	protein_coding	4.95146	5.43478	6.79133	8.29697	5.66506	4.42618
ENSG00000161940	BCL6B	protein_coding	0.027332	0	0	0	0	0.015938
ENSG00000110987	BCL7A	protein_coding	1.77429	2.07492	1.2254	3.12494	2.22734	2.27705
ENSG00000106635	BCL7B	protein_coding	18.2571	19.7803	16.6096	22.4006	21.0003	23.2223
ENSG00000099385	BCL7C	protein_coding	8.03621	8.37493	7.16326	12.5084	6.65789	7.45584
ENSG00000116128	BCL9	protein_coding	2.01029	3.25392	2.83269	2.54972	2.06449	4.41965
ENSG00000186174	BCL9L	protein_coding	48.3206	63.0483	66.3813	84.9946	47.5819	87.7034
ENSG00000029363	BCLAF1	protein_coding	47.2276	46.0067	45.0707	27.1685	69.1493	36.476
ENSG00000173681	BCLAF3	protein_coding	3.7394	5.41281	5.56086	4.46038	4.8582	6.80655
ENSG00000197580	BCO2	protein_coding	0.40583	0.555052	0.302514	0.397295	0.400338	0.526649
ENSG00000183337	BCOR	protein_coding	5.70226	6.8956	6.57142	9.59619	5.54686	11.0376
ENSG00000085185	BCORL1	protein_coding	1.12014	1.2994	1.18705	2.12024	1.50377	4.56238
ENSG00000186716	BCR	protein_coding	23.2785	25.7418	17.3404	22.3128	26.2255	25.4719
ENSG00000074582	BCS1L	protein_coding	4.78446	5.32189	2.87391	8.9543	2.99611	7.3641
ENSG00000161267	BDH1	protein_coding	3.68829	4.68791	5.2261	5.00708	4.17262	7.1947
ENSG00000164039	BDH2	protein_coding	5.22471	6.19752	5.82148	6.30274	3.99295	9.27714
ENSG00000168398	BDKRB2	protein_coding	0.014243	0	0.012493	0	0.009726	0
ENSG00000176697	BDNF	protein_coding	0	0.021533	0.035886	0.000201	0.048843	0.025856
ENSG00000145734	BDP1	protein_coding	11.4926	10.1547	10.7338	7.18675	11.7019	12.1212
ENSG00000166546	BEAN1	protein_coding	0.166835	0.078768	0.047489	0.257357	0.05355	0.037275
ENSG00000126581	BECN1	protein_coding	30.2476	35.8987	31.2282	24.2059	37.8542	29.6786
ENSG00000196289	BECN2	protein_coding	0	0	0	0	0	0
ENSG00000183092	BEGAIN	protein_coding	0.059229	0.280971	0.482365	0.824499	0.728263	0.118839
ENSG00000177324	BEND2	protein_coding	0.230385	0.367708	0.018052	0	0.085231	0
ENSG00000178409	BEND3	protein_coding	0.440703	0.409538	0.39665	0.654477	0.597084	0.662873
ENSG00000188848	BEND4	protein_coding	0.033368	0.057517	0.038929	0.120716	0.184946	0.191902
ENSG00000162373	BEND5	protein_coding	1.50044	1.00693	1.00466	0.379822	0.82091	1.01965
ENSG00000151917	BEND6	protein_coding	0.019023	0.035358	0	0.071913	0.153443	0.111468
ENSG00000167995	BEST1	protein_coding	2.02955	1.12067	0.536924	3.94436	1.0678	1.25169
ENSG00000039987	BEST2	protein_coding	0	0.038532	0	0	0	0
ENSG00000127325	BEST3	protein_coding	0	0	0	0	0	0
ENSG00000142959	BEST4	protein_coding	0.451189	0.962572	1.54183	0.55433	0.931119	0.45239
ENSG00000105829	BET1	protein_coding	3.96626	3.21394	3.7876	3.95458	2.9741	4.49955
ENSG00000177951	BET1L	protein_coding	33.9415	33.448	37.9418	32.7449	28.5669	25.9322
ENSG00000133169	BEX1	protein_coding	0	0.241769	0.098977	0	0.421474	0.065578
ENSG00000133134	BEX2	protein_coding	12.2625	12.866	14.0615	11.237	13.789	5.75274
ENSG00000166681	BEX3	protein_coding	7.59154	9.05189	2.37443	7.52332	5.8227	6.60379
ENSG00000102409	BEX4	protein_coding	8.21662	9.69395	9.85597	7.38016	10.6976	8.18248
ENSG00000184515	BEX5	protein_coding	1.51964	1.90585	1.59394	0.867739	2.22481	2.09952
ENSG00000103429	BFAR	protein_coding	20.8631	21.2487	19.3107	18.5609	19.9216	21.3628
ENSG00000125864	BFSP1	protein_coding	0.094289	0.092462	0.105861	0.322971	0.439949	0.162839
ENSG00000170819	BFSP2	protein_coding	0.299604	0.316609	0	0.402309	0	0.205816
ENSG00000242252	BGLAP	protein_coding	0.461918	0.394721	0	1.19184	1.46523	0.719052
ENSG00000180535	BHLHA15	protein_coding	0.368691	0.579838	0.286286	0.21449	0.094296	0.073031
ENSG00000198908	BHLHB9	protein_coding	0.667057	0.920454	0.608252	0.644445	0.80869	0.745422
ENSG00000180828	BHLHE22	protein_coding	0	0	0	0	0	0
ENSG00000134107	BHLHE40	protein_coding	22.6562	20.0164	18.5756	22.468	21.7152	19.265
ENSG00000123095	BHLHE41	protein_coding	0.025408	0	0	0.015003	0.01735	0.014766
ENSG00000237452	BHMG1	protein_coding	0	0	0	0	0	0.041222
ENSG00000145692	BHMT	protein_coding	0	0	0	0	0	0
ENSG00000132840	BHMT2	protein_coding	0	0	0.027523	0	0	0
ENSG00000122870	BICC1	protein_coding	0	0	0.031187	0.035667	0.01216	0.031046
ENSG00000151746	BICD1	protein_coding	5.92464	7.64747	7.62549	5.78627	6.53056	8.46602
ENSG00000185963	BICD2	protein_coding	9.13531	10.5173	9.39585	13.8956	9.73657	13.0854
ENSG00000135127	BICDL1	protein_coding	19.6588	23.3283	19.2207	51.0334	18.2218	29.9614
ENSG00000162069	BICDL2	protein_coding	0	0.046464	0	3.52292	0.018918	0
ENSG00000063169	BICRA	protein_coding	8.24794	9.61543	10.7076	15.9282	10.6464	15.0671
ENSG00000112624	BICRAL	protein_coding	12.785	15.7475	14.0764	14.2618	13.8668	17.8779
ENSG00000015475	BID	protein_coding	6.6174	6.37107	5.72949	12.4546	9.5192	7.84261
ENSG00000100290	BIK	protein_coding	0.498183	0.645619	0.669412	1.69035	0.925736	1.05074
ENSG00000136717	BIN1	protein_coding	37.3692	29.2181	26.4531	51.5794	36.1445	48.9636
ENSG00000110934	BIN2	protein_coding	45.5354	47.6556	50.0293	55.1538	49.0111	60.3497
ENSG00000147439	BIN3	protein_coding	16.5487	19.0401	19.0078	22.6913	20.8293	17.1125
ENSG00000110330	BIRC2	protein_coding	30.7177	25.7466	27.7911	20.6892	30.1478	26.6145
ENSG00000023445	BIRC3	protein_coding	88.4461	46.1536	43.1398	36.0135	85.2393	55.0745
ENSG00000089685	BIRC5	protein_coding	1.24887	0.81822	0.810038	3.06683	0.921244	1.61948
ENSG00000115760	BIRC6	protein_coding	75.1037	64.7529	69.1087	51.7062	70.1747	70.2312
ENSG00000101197	BIRC7	protein_coding	0.070314	0.200154	0.037261	0.081476	0	0.037414
ENSG00000134897	BIVM	protein_coding	0	0.484376	0	0	3.6362	2.96245
ENSG00000270181	BIVM-ERCC5	protein_coding	17.0136	14.7004	13.3774	7.82971	0	0
ENSG00000166619	BLCAP	protein_coding	30.4891	26.7611	29.3136	40.0785	29.9664	31.0569
ENSG00000136573	BLK	protein_coding	0.402666	0.280422	0.11917	0.14764	0.295861	1.06284
ENSG00000197299	BLM	protein_coding	1.91952	1.96921	2.27688	1.19638	1.85593	2.00509
ENSG00000108578	BLMH	protein_coding	14.8301	15.5288	12.6093	12.9184	17.6982	12.5039
ENSG00000095585	BLNK	protein_coding	0	0.833597	0.080437	0.739763	1.11649	1.13749
ENSG00000135441	BLOC1S1	protein_coding	12.9184	14.8831	11.4242	25.827	15.3326	21.0585
ENSG00000196072	BLOC1S2	protein_coding	12.1811	12.7031	9.27015	9.08604	9.17293	16.7264
ENSG00000189114	BLOC1S3	protein_coding	7.58504	9.51944	9.81032	12.4018	6.72507	8.22984
ENSG00000186222	BLOC1S4	protein_coding	12.0691	12.6655	10.2376	10.9574	8.70964	9.7089
ENSG00000188428	BLOC1S5	protein_coding	4.26605	4.18094	2.79777	4.42849	3.57395	7.78827
ENSG00000104164	BLOC1S6	protein_coding	13.3071	11.3812	12.9091	9.23284	16.0732	10.7421
ENSG00000106605	BLVRA	protein_coding	10.3668	8.74148	10.247	21.8969	10.1701	11.6074
ENSG00000090013	BLVRB	protein_coding	3.2145	3.32801	1.10637	9.01459	3.81889	2.78241
ENSG00000117475	BLZF1	protein_coding	10.9746	9.62769	10.3099	8.0422	10.7521	10.4966
ENSG00000104081	BMF	protein_coding	3.29078	4.15542	3.38182	11.1467	14.6718	4.5674
ENSG00000168283	BMI1	protein_coding	24.344	19.7879	20.2466	11.6108	18.8934	16.9946
ENSG00000168487	BMP1	protein_coding	0.899289	1.26999	0.872172	1.51423	1.91146	1.39068
ENSG00000125845	BMP2	protein_coding	0.027073	0.035039	0.022601	0	0	0.015734
ENSG00000138756	BMP2K	protein_coding	2.13565	2.96187	1.65736	3.69553	3.93407	4.61764
ENSG00000152785	BMP3	protein_coding	0	0	0	0.010039	0	0
ENSG00000125378	BMP4	protein_coding	0	0	0	0	0.034197	0.025972
ENSG00000153162	BMP6	protein_coding	0.61182	0.765981	0.274184	0.020707	0.15382	0.020381
ENSG00000101144	BMP7	protein_coding	0	0	0	0	0.015575	0
ENSG00000183682	BMP8A	protein_coding	0.173284	0.045727	0.210869	0.18829	0.246392	0.062454
ENSG00000116985	BMP8B	protein_coding	0.560346	0.28724	0.414001	0.381678	0.470955	0.340482
ENSG00000164619	BMPER	protein_coding	0.028746	0.032659	0	0	0.033081	0
ENSG00000107779	BMPR1A	protein_coding	1.7545	2.42245	1.19802	1.05158	1.52126	2.30912
ENSG00000138696	BMPR1B	protein_coding	0.017512	0.029744	0.03492	0	0.005006	0.076399
ENSG00000204217	BMPR2	protein_coding	5.78917	6.10567	6.81866	3.44765	5.88907	5.05834
ENSG00000165733	BMS1	protein_coding	5.71898	6.08966	5.89224	5.23962	6.14769	6.89848
ENSG00000164603	BMT2	protein_coding	6.6435	7.56478	4.59797	4.44471	4.74841	6.89256
ENSG00000173068	BNC2	protein_coding	0	0.046594	0	0	0.056551	0.013205
ENSG00000113734	BNIP1	protein_coding	8.48577	8.30212	7.88188	7.70347	8.20455	8.76725
ENSG00000140299	BNIP2	protein_coding	24.6334	19.2555	35.9259	14.9904	20.573	18.8034
ENSG00000176171	BNIP3	protein_coding	6.49785	6.78675	6.52114	6.43903	5.70937	8.34564
ENSG00000104765	BNIP3L	protein_coding	25.2803	24.9801	26.6032	18.2936	25.1861	20.5109
ENSG00000163141	BNIPL	protein_coding	0.302977	0.114995	0.406919	0.514154	0.186277	0.580378
ENSG00000144857	BOC	protein_coding	0.020984	0	0	0	0	0.012195
ENSG00000145919	BOD1	protein_coding	12.9744	9.20171	11.2348	9.03576	11.3616	10.521
ENSG00000038219	BOD1L1	protein_coding	12.4555	13.6616	15.5462	10.3111	14.5007	15.3171
ENSG00000228075	BOD1L2	protein_coding	0	0	0	0	0	0
ENSG00000176720	BOK	protein_coding	0	0.141698	0	0.09598	0	0.05056
ENSG00000178096	BOLA1	protein_coding	1.45276	2.44896	1.87444	3.14715	1.66275	2.35557
ENSG00000183336	BOLA2	protein_coding	0.259328	5.5977	4.91745	13.1773	5.43896	9.70861
ENSG00000169627	BOLA2B	protein_coding	14.2397	8.46897	8.69246	17.0208	7.38673	12.0128
ENSG00000261740	BOLA2-SMG1P6	protein_coding	8.15314	2.47136	6.87134	8.3188	7.3713	1.75119
ENSG00000163170	BOLA3	protein_coding	3.45708	3.79641	2.60412	3.61819	5.21282	5.69521
ENSG00000152430	BOLL	protein_coding	0	0	0	0	0	0
ENSG00000261236	BOP1	protein_coding	8.32481	8.40528	7.15381	19.8046	8.23706	13.121
ENSG00000136122	BORA	protein_coding	4.70503	2.95697	3.00089	3.61433	3.59292	3.49192
ENSG00000165714	BORCS5	protein_coding	13.5924	10.0402	15.1291	10.8796	10.4629	11.3665
ENSG00000196544	BORCS6	protein_coding	2.58242	3.99108	2.08604	6.94406	1.9142	4.21551
ENSG00000166275	BORCS7	protein_coding	10.098	8.07664	8.23991	9.58976	6.74987	8.7632
ENSG00000254901	BORCS8	protein_coding	7.17035	5.84005	4.88073	9.95086	7.69797	8.5788
ENSG00000064489	BORCS8-MEF2B	protein_coding	2.45136	2.48247	1.90047	0.952528	2.66567	1.98638
ENSG00000172331	BPGM	protein_coding	5.43047	3.71581	3.35257	5.57277	4.70992	4.15708
ENSG00000137274	BPHL	protein_coding	2.06558	2.3865	2.20578	2.02422	2.00519	1.79639
ENSG00000101425	BPI	protein_coding	0	0	0	0.058775	0.14198	0
ENSG00000184459	BPIFC	protein_coding	0	0	0.039534	0	0	0
ENSG00000162813	BPNT1	protein_coding	2.58438	1.89535	1.06514	5.45701	1.92237	4.55403
ENSG00000171634	BPTF	protein_coding	27.7178	39.1663	37.6666	33.0145	38.7064	50.96
ENSG00000157764	BRAF	protein_coding	29.136	29.0729	36.9956	12.6098	33.5943	23.3139
ENSG00000089234	BRAP	protein_coding	9.63358	9.62166	11.5141	8.95437	12.452	10.1961
ENSG00000106009	BRAT1	protein_coding	15.0014	14.4709	13.8665	30.9509	15.6359	19.5818
ENSG00000012048	BRCA1	protein_coding	0.38018	1.07672	0.466706	0.933049	0.550703	0.710365
ENSG00000139618	BRCA2	protein_coding	1.20002	1.32914	1.30645	0.898845	1.6255	1.50517
ENSG00000185515	BRCC3	protein_coding	8.09884	9.54812	9.12823	5.36839	8.46397	6.46946
ENSG00000100425	BRD1	protein_coding	35.7113	34.9296	47.6443	36.2542	51.8698	35.0131
ENSG00000204256	BRD2	protein_coding	44.2165	42.3596	43.1825	49.553	53.6568	50.9502
ENSG00000169925	BRD3	protein_coding	8.59059	10.1257	8.07167	15.7738	9.66073	13.1491
ENSG00000235106	BRD3OS	protein_coding	2.467	3.71123	3.37414	2.78304	2.90679	4.00242
ENSG00000141867	BRD4	protein_coding	29.8014	30.2758	44.8133	44.4872	36.4769	43.979
ENSG00000166164	BRD7	protein_coding	28.1127	21.8694	38.7037	12.7171	36.805	18.2763
ENSG00000112983	BRD8	protein_coding	4.59369	6.41017	5.10087	7.61288	4.15261	9.30824
ENSG00000028310	BRD9	protein_coding	27.3349	27.4383	37.526	27.4125	30.8246	29.4336
ENSG00000137948	BRDT	protein_coding	0	0.044304	0.069412	0.050068	0.017502	0
ENSG00000185024	BRF1	protein_coding	24.7372	22.6468	27.6306	38.7273	31.1105	24.5596
ENSG00000104221	BRF2	protein_coding	8.72412	8.63776	6.78359	5.85263	6.03953	5.00435
ENSG00000164713	BRI3	protein_coding	24.9028	27.6882	28.5825	46.182	32.1669	28.025
ENSG00000184992	BRI3BP	protein_coding	2.29674	3.62445	2.17585	5.08872	2.94895	4.06128
ENSG00000182685	BRICD5	protein_coding	3.76851	3.8467	3.87075	6.38666	3.1419	5.53532
ENSG00000136492	BRIP1	protein_coding	2.23108	1.56893	1.86191	1.57058	2.68631	2.46655
ENSG00000113460	BRIX1	protein_coding	9.11298	7.35725	7.74676	4.34016	9.22503	7.4885
ENSG00000254999	BRK1	protein_coding	19.1876	18.7269	11.6309	28.6528	15.7854	23.4989
ENSG00000174744	BRMS1	protein_coding	17.2536	17.1072	14.602	20.5108	16.2749	16.5404
ENSG00000100916	BRMS1L	protein_coding	1.23268	1.73559	1.3214	1.16358	1.44692	1.90001
ENSG00000162819	BROX	protein_coding	17.689	17.7216	16.9192	12.4192	18.0748	15.5109
ENSG00000156983	BRPF1	protein_coding	10.2886	12.2994	11.9275	11.9331	12.045	12.1756
ENSG00000096070	BRPF3	protein_coding	10.1544	11.1668	12.6827	9.66042	12.9823	12.5517
ENSG00000160469	BRSK1	protein_coding	0.093193	0.337758	0.271154	0.152011	0.162924	0.217442
ENSG00000174672	BRSK2	protein_coding	0.079334	0.189467	0.167698	0.350036	0.137168	0.175512
ENSG00000185658	BRWD1	protein_coding	67.8007	59.632	80.6115	28.2746	61.7299	43.0925
ENSG00000165288	BRWD3	protein_coding	12.1753	11.6528	12.3365	8.20576	12.4757	11.6169
ENSG00000168000	BSCL2	protein_coding	9.41229	9.21995	8.15842	12.4256	7.60766	8.85213
ENSG00000160058	BSDC1	protein_coding	29.4412	29.7791	34.5064	22.7673	29.8651	23.4471
ENSG00000172270	BSG	protein_coding	35.4495	42.4758	29.4216	53.9677	36.2437	43.3627
ENSG00000164061	BSN	protein_coding	0.063832	0.041579	0.056813	0.053635	0.070319	0.021141
ENSG00000162399	BSND	protein_coding	0.019003	0	0	0	0	0
ENSG00000119411	BSPRY	protein_coding	0.06252	0.160033	0.073122	0.489297	0.424604	0.214397
ENSG00000109743	BST1	protein_coding	1.01512	0.606134	0.931311	2.26045	1.1552	0.783105
ENSG00000130303	BST2	protein_coding	23.4419	19.124	11.5227	51.9861	20.8889	37.9434
ENSG00000095564	BTAF1	protein_coding	36.3985	32.7154	39.6776	25.1799	37.95	36.8573
ENSG00000064726	BTBD1	protein_coding	21.1763	19.1811	21.9087	18.8273	22.9467	18.5755
ENSG00000148925	BTBD10	protein_coding	13.506	12.8427	11.3216	10.527	10.1575	11.0073
ENSG00000151136	BTBD11	protein_coding	15.9246	14.3495	18.2399	9.09239	15.2184	12.9687
ENSG00000138152	BTBD16	protein_coding	0	0	0	0	0	0.010424
ENSG00000204347	BTBD17	protein_coding	0	0	0.047377	0	0	0.031181
ENSG00000233436	BTBD18	protein_coding	0.476636	0.504549	0.500768	0.206829	0.323402	0.183336
ENSG00000222009	BTBD19	protein_coding	3.02672	3.54609	3.03787	4.30513	3.25382	3.54477
ENSG00000133243	BTBD2	protein_coding	23.9163	24.1363	23.8225	33.6989	23.6247	25.6813
ENSG00000132640	BTBD3	protein_coding	0.587553	0.295973	0.195821	0.27827	0.8128	0.780365
ENSG00000184887	BTBD6	protein_coding	14.7691	15.1007	14.3382	16.4829	14.8242	14.602
ENSG00000011114	BTBD7	protein_coding	5.43962	6.96169	5.69982	5.33951	6.64916	7.55987
ENSG00000189195	BTBD8	protein_coding	1.53999	1.31971	1.25772	1.05055	2.28184	2.81834
ENSG00000183826	BTBD9	protein_coding	43.8205	40.2913	45.0918	19.8659	39.9182	30.7744
ENSG00000169814	BTD	protein_coding	10.7228	8.21396	12.5621	5.23405	5.21	11.3812
ENSG00000145741	BTF3	protein_coding	197.289	202.687	174.981	173.182	183.84	169.5
ENSG00000134717	BTF3L4	protein_coding	8.97981	10.0774	10.5872	7.81123	9.96031	8.88626
ENSG00000133639	BTG1	protein_coding	338.17	301.422	323.059	173.755	378.468	229.692
ENSG00000159388	BTG2	protein_coding	110.792	134.544	128.927	66.0095	101.804	86.059
ENSG00000154640	BTG3	protein_coding	19.0073	21.1443	14.8943	19.1224	18.1721	14.6893
ENSG00000010671	BTK	protein_coding	1.40439	2.81668	0.5711	10.0639	3.94563	4.12684
ENSG00000186265	BTLA	protein_coding	6.03481	6.19573	5.98577	5.97235	5.13323	9.89532
ENSG00000124557	BTN1A1	protein_coding	0.167589	0	0	0	0	0.019571
ENSG00000112763	BTN2A1	protein_coding	10.4907	10.1755	9.0444	12.2503	12.1907	16.1811
ENSG00000124508	BTN2A2	protein_coding	4.22826	3.15396	3.61059	5.44303	3.42437	6.46932
ENSG00000026950	BTN3A1	protein_coding	59.1114	76.1249	57.8687	74.9802	52.6121	118.123
ENSG00000186470	BTN3A2	protein_coding	26.2258	22.6898	9.69651	38.2645	9.68187	43.3462
ENSG00000111801	BTN3A3	protein_coding	25.1929	25.7722	14.4711	36.9921	23.5448	55.1844
ENSG00000113303	BTNL8	protein_coding	0	0	0.038365	0.152791	0	0
ENSG00000165810	BTNL9	protein_coding	0	0	0	0	0	0
ENSG00000166167	BTRC	protein_coding	5.89085	8.83818	6.5007	3.67134	6.19377	5.17481
ENSG00000169679	BUB1	protein_coding	1.11903	1.846	1.21622	1.69538	2.11527	1.99962
ENSG00000156970	BUB1B	protein_coding	0.146629	0.407445	0.266088	0.609805	0.550925	0.619967
ENSG00000259288	BUB1B-PAK6	protein_coding	0	0	0.192387	0.196813	0	0
ENSG00000154473	BUB3	protein_coding	28.6203	26.4874	32.1857	25.9796	22.3968	26.0935
ENSG00000137656	BUD13	protein_coding	4.09896	3.49692	3.06262	3.93874	3.05469	5.24131
ENSG00000071462	BUD23	protein_coding	26.3283	27.0974	26.6786	25.4768	27.0384	26.2275
ENSG00000106245	BUD31	protein_coding	25.355	18.6865	19.5788	25.2906	19.9786	21.666
ENSG00000112276	BVES	protein_coding	0	0	0.015361	0.061941	0.011958	0
ENSG00000278704	BX004987.1	protein_coding	0	0.033591	0.012743	0.013682	0.001984	0.040075
ENSG00000283378	BX088645.1	protein_coding	0	0.129126	0	0.077245	0	0
ENSG00000284976	BX255925.3	protein_coding	11.3188	11.0528	11.87	18.1952	11.1354	14.4105
ENSG00000283599	BX276092.9	protein_coding	0.056614	0	0	0	0	0
ENSG00000112578	BYSL	protein_coding	1.3866	1.71471	1.48246	2.84282	1.17983	2.13385
ENSG00000082153	BZW1	protein_coding	42.361	40.0874	36.3309	29.0669	34.2234	31.5649
ENSG00000136261	BZW2	protein_coding	7.3936	10.8189	7.02519	13.0819	9.46885	13.4273
ENSG00000214688	C10orf105	protein_coding	0.453317	0.299497	0.296726	1.43978	0.361616	0.475872
ENSG00000204683	C10orf113	protein_coding	0	0.135627	0.160276	0	0.060125	0
ENSG00000237489	C10orf143	protein_coding	3.12728	2.6847	1.67236	2.06033	2.15972	2.81781
ENSG00000178645	C10orf53	protein_coding	0	0	0	0	0	0
ENSG00000222047	C10orf55	protein_coding	0.041309	0	0	0.166846	0	0
ENSG00000179133	C10orf67	protein_coding	0.066292	0.063973	0	0.027483	0	0.024467
ENSG00000119965	C10orf88	protein_coding	2.48253	2.76524	2.14273	1.67385	2.13924	3.05317
ENSG00000154493	C10orf90	protein_coding	0.031218	0	0	0	0	0
ENSG00000120055	C10orf95	protein_coding	0.542638	0.514011	0.90868	0.813108	0.639905	0.585741
ENSG00000137720	C11orf1	protein_coding	1.01821	0.950515	2.77694	1.34464	2.33964	2.88775
ENSG00000176029	C11orf16	protein_coding	0	0.013914	0	0	0	0
ENSG00000110665	C11orf21	protein_coding	29.7394	35.1496	19.7922	47.1974	45.4508	37.8378
ENSG00000171067	C11orf24	protein_coding	1.25881	1.68445	1.33028	2.79896	1.37755	2.5621
ENSG00000180878	C11orf42	protein_coding	0	0	0	0	0	0
ENSG00000174370	C11orf45	protein_coding	0.1349	0.178512	0.094389	0.015885	0.172351	0.164136
ENSG00000149179	C11orf49	protein_coding	3.59786	3.17199	3.14635	5.52808	4.4611	3.61765
ENSG00000149300	C11orf52	protein_coding	0	0	0	0	0	0
ENSG00000182919	C11orf54	protein_coding	9.55306	7.9283	8.63025	6.2675	5.17155	9.58169
ENSG00000110696	C11orf58	protein_coding	12.2734	10.5294	12.2886	25.966	42.0238	36.4154
ENSG00000166323	C11orf65	protein_coding	1.1173	0.926594	0.647617	0.435987	0.514669	0.848678
ENSG00000175573	C11orf68	protein_coding	10.342	12.1655	10.27	18.23	10.9842	15.6527
ENSG00000180425	C11orf71	protein_coding	3.90826	2.76606	2.35126	2.77938	4.23771	2.72649
ENSG00000166352	C11orf74	protein_coding	0	0.42088	0.843709	0.237626	0.093529	0.42954
ENSG00000173715	C11orf80	protein_coding	4.13308	4.3044	4.41403	5.30706	6.46312	6.24666
ENSG00000205177	C11orf91	protein_coding	0.260483	0.100542	0.303487	0.038954	0.278506	0.086142
ENSG00000234776	C11orf94	protein_coding	0	0	0	0	0	0
ENSG00000188070	C11orf95	protein_coding	0.481968	0.893519	0.44094	1.75058	0.655295	0.844963
ENSG00000187479	C11orf96	protein_coding	0.073079	0.08754	0.19826	0.23519	0.102895	0.131358
ENSG00000278615	C11orf98	protein_coding	0.770687	1.18891	0.583384	1.12752	0.824437	0.441469
ENSG00000139637	C12orf10	protein_coding	7.2373	8.62447	7.05838	10.3524	9.201	8.8583
ENSG00000133641	C12orf29	protein_coding	4.76467	4.5653	3.92971	3.65529	3.35396	4.52474
ENSG00000047621	C12orf4	protein_coding	4.86199	5.61985	4.96159	4.22423	6.7562	5.60522
ENSG00000180116	C12orf40	protein_coding	0.082856	0	0.035072	0.080443	0.050459	0.195619
ENSG00000179088	C12orf42	protein_coding	1.99103	2.81313	2.18096	1.77341	1.24248	2.60169
ENSG00000157895	C12orf43	protein_coding	3.76383	5.20571	5.08557	4.30977	5.29598	3.62963
ENSG00000151131	C12orf45	protein_coding	1.02051	1.76834	0.889419	1.44559	1.53095	2.08533
ENSG00000111412	C12orf49	protein_coding	5.62706	5.71326	3.61032	5.85206	3.68927	5.5884
ENSG00000185306	C12orf56	protein_coding	0.073645	0.024839	0.062215	0.129275	0.010087	0.100622
ENSG00000111678	C12orf57	protein_coding	43.5567	45.2853	43.6193	53.7818	40.6753	38.585
ENSG00000182993	C12orf60	protein_coding	0	0.149851	0.070483	0	0.174771	0.045705
ENSG00000130921	C12orf65	protein_coding	18.6183	16.4794	19.1158	10.1725	15.6038	12.0043
ENSG00000174206	C12orf66	protein_coding	5.78361	5.5154	6.1096	5.74428	5.20227	6.05354
ENSG00000214700	C12orf71	protein_coding	0.10187	0.085099	0	0	0.220237	0
ENSG00000204954	C12orf73	protein_coding	6.24843	4.81517	9.2426	2.48714	6.05593	4.93046
ENSG00000214215	C12orf74	protein_coding	0.044638	0	0.038895	0.026358	0.107307	0
ENSG00000235162	C12orf75	protein_coding	4.57698	11.4832	8.39851	12.0071	13.6422	9.5588
ENSG00000174456	C12orf76	protein_coding	5.47236	4.02681	4.17303	7.39826	4.85973	6.59526
ENSG00000226792	C13orf42	protein_coding	0	0	0	0	0	0.018824
ENSG00000283199	C13orf46	protein_coding	7.13385	9.19856	11.0425	11.4486	9.32009	11.9243
ENSG00000179933	C14orf119	protein_coding	2.10872	2.24258	2.36833	3.08014	1.45416	4.79216
ENSG00000227051	C14orf132	protein_coding	0.572205	0.985712	0.649557	0.136192	0.416018	0.267917
ENSG00000197734	C14orf178	protein_coding	0	0	0	0	0	0
ENSG00000184601	C14orf180	protein_coding	0	0	0	0	0	0
ENSG00000179476	C14orf28	protein_coding	2.22561	2.14277	2.11888	0.790121	1.99962	2.40553
ENSG00000100802	C14orf93	protein_coding	2.96231	2.21331	2.43123	4.51881	2.10057	4.4052
ENSG00000250021	C15orf38-AP3S2	protein_coding	0	0	0	0.041167	0	0
ENSG00000167173	C15orf39	protein_coding	8.5774	8.77754	6.85485	30.2725	13.0568	13.284
ENSG00000169609	C15orf40	protein_coding	4.77489	5.51668	5.22593	6.0932	4.0606	4.76408
ENSG00000186073	C15orf41	protein_coding	2.35512	1.91844	2.08244	1.55143	2.02073	2.64441
ENSG00000166920	C15orf48	protein_coding	0.020109	0	0.594701	0.359499	0.864202	0.103472
ENSG00000175779	C15orf53	protein_coding	0.78787	0.954507	0.96734	1.28542	1.01983	1.38297
ENSG00000189227	C15orf61	protein_coding	4.85034	3.83281	4.6342	4.98262	4.77816	3.88952
ENSG00000188277	C15orf62	protein_coding	0.813232	1.12995	1.23391	0.826984	0.965822	0.820322
ENSG00000261652	C15orf65	protein_coding	0	0	0	0	0	0
ENSG00000166780	C16orf45	protein_coding	1.30336	1.43808	1.07204	0.971047	1.35033	1.19767
ENSG00000166455	C16orf46	protein_coding	0.19384	0.20477	0.10713	0.224822	0.289888	0.341206
ENSG00000185905	C16orf54	protein_coding	65.6534	61.9978	46.1679	100.159	66.9977	56.7321
ENSG00000140688	C16orf58	protein_coding	15.1767	18.0299	16.6791	14.1712	16.5667	23.1119
ENSG00000125149	C16orf70	protein_coding	3.03664	5.18013	5.14377	7.76703	5.7896	7.67843
ENSG00000166246	C16orf71	protein_coding	0.314209	0.187099	0.087655	0.154736	0.020174	0.163412
ENSG00000182831	C16orf72	protein_coding	81.0773	77.1797	81.3022	53.957	79.9065	61.6104
ENSG00000154102	C16orf74	protein_coding	2.30293	2.75455	1.96119	1.99825	2.28237	3.62203
ENSG00000159761	C16orf86	protein_coding	0.434075	1.55649	1.30475	1.70802	1.64545	2.50715
ENSG00000155330	C16orf87	protein_coding	6.30956	8.87801	6.05265	7.72098	8.98838	7.93937
ENSG00000153446	C16orf89	protein_coding	0	0	0	0.092512	0	0
ENSG00000215131	C16orf90	protein_coding	0.078412	0	0	0.039777	0	0
ENSG00000174109	C16orf91	protein_coding	4.54417	3.91625	3.7771	6.07589	3.58958	3.68419
ENSG00000260456	C16orf95	protein_coding	0.469573	0.775239	0.665949	0.583495	0.190202	1.3133
ENSG00000205832	C16orf96	protein_coding	0.178903	0.200314	0.350013	0.34425	0.207862	0.204914
ENSG00000256806	C17orf100	protein_coding	0.831655	0.524528	0.048699	0.88153	0.151394	0.534003
ENSG00000205710	C17orf107	protein_coding	2.37307	1.73574	1.8909	3.98925	1.19683	1.70927
ENSG00000267221	C17orf113	protein_coding	0.665009	0.384975	0.069159	0.543301	0.235069	0.346459
ENSG00000181013	C17orf47	protein_coding	0	0	0	0	0	0
ENSG00000258315	C17orf49	protein_coding	15.676	14.9976	15.6164	31.6586	19.2546	21.8854
ENSG00000270806	C17orf50	protein_coding	0	0.244857	0	0.169646	0.126432	0.159962
ENSG00000212719	C17orf51	protein_coding	0.502885	0.442297	0.348915	0.485575	0.497881	1.00521
ENSG00000125319	C17orf53	protein_coding	0.296558	0.328273	0.392323	0.729535	0.427895	0.658705
ENSG00000186665	C17orf58	protein_coding	0.155666	0.093713	0.12164	0.324709	0.150283	0.572233
ENSG00000141371	C17orf64	protein_coding	0.067579	0	0	0.379065	0	0.212123
ENSG00000214226	C17orf67	protein_coding	2.03581	3.19353	2.41791	2.37027	2.25297	3.11264
ENSG00000108666	C17orf75	protein_coding	4.04865	4.24883	5.23492	2.86591	4.33438	4.17987
ENSG00000278505	C17orf78	protein_coding	0	0.058695	0	0	0	0.030429
ENSG00000141219	C17orf80	protein_coding	1.13458	1.03543	2.07916	2.77123	1.45152	2.51071
ENSG00000187624	C17orf97	protein_coding	0.205646	0.212861	0.335749	0.259919	0	0.282842
ENSG00000275489	C17orf98	protein_coding	0	0	0	0	0	0
ENSG00000187997	C17orf99	protein_coding	0	0	0.028977	0	0	0
ENSG00000141428	C18orf21	protein_coding	5.03869	6.73608	10.1194	5.10173	8.06329	5.60988
ENSG00000152242	C18orf25	protein_coding	34.8557	36.256	25.3192	41.8225	35.3046	39.7436
ENSG00000177576	C18orf32	protein_coding	8.80026	6.43834	7.44602	13.5357	6.56751	12.1353
ENSG00000166845	C18orf54	protein_coding	0.560064	0.481237	0.500232	0.858562	0.39886	0.914664
ENSG00000131943	C19orf12	protein_coding	14.1396	13.3117	12.3729	20.1654	8.45576	17.4601
ENSG00000177025	C19orf18	protein_coding	0.45258	0.463369	0.498307	0.056492	0.274339	0.338367
ENSG00000228300	C19orf24	protein_coding	12.3887	15.6132	11.6941	25.469	15.1249	18.556
ENSG00000119559	C19orf25	protein_coding	13.3984	14.7707	11.9456	27.2292	13.0314	20.4667
ENSG00000167644	C19orf33	protein_coding	0	0.496781	0.366236	0.413355	0.426237	0.002551
ENSG00000214212	C19orf38	protein_coding	1.40431	1.23251	0.706793	11.0184	4.20185	2.39689
ENSG00000105072	C19orf44	protein_coding	0.415839	0.386428	0.450405	0.955393	0.577542	0.882128
ENSG00000160392	C19orf47	protein_coding	3.39816	4.68868	2.53596	6.88416	3.46632	3.15837
ENSG00000167747	C19orf48	protein_coding	23.7429	22.125	21.9085	21.6739	23.6415	19.3631
ENSG00000104979	C19orf53	protein_coding	7.32011	6.22254	6.95838	7.46358	8.07291	6.41012
ENSG00000188493	C19orf54	protein_coding	1.67483	1.8909	1.47504	3.80128	2.02453	3.36958
ENSG00000132016	C19orf57	protein_coding	1.87524	2.06064	1.22607	2.60492	1.56575	1.71941
ENSG00000130813	C19orf66	protein_coding	19.158	21.4942	18.3442	14.3988	20.1574	33.5074
ENSG00000188032	C19orf67	protein_coding	0	0.109726	0.119854	0	0.026254	0
ENSG00000174917	C19orf70	protein_coding	6.7635	8.23104	8.4768	13.5151	7.47693	8.37707
ENSG00000183397	C19orf71	protein_coding	7.73693	8.5152	10.0454	8.74261	8.48277	8.97383
ENSG00000221916	C19orf73	protein_coding	0.524135	0.625595	0	0.449288	0.621287	0.75444
ENSG00000262874	C19orf84	protein_coding	0	0	0.064883	0.024473	0.106251	0
ENSG00000283567	C19orf85	protein_coding	0	0	0	0	0	0
ENSG00000197223	C1D	protein_coding	5.27982	7.65803	6.98398	3.11195	8.67056	4.42147
ENSG00000106392	C1GALT1	protein_coding	15.9781	19.3242	13.6885	8.14664	13.2099	16.0683
ENSG00000171155	C1GALT1C1	protein_coding	5.42326	4.0867	3.01992	4.90459	2.69192	5.98645
ENSG00000223658	C1GALT1C1L	protein_coding	0	0	0	0	0	0
ENSG00000180999	C1orf105	protein_coding	0	0	0	0.021544	0	0
ENSG00000116922	C1orf109	protein_coding	6.10816	8.49917	6.19452	5.74254	4.58248	5.26063
ENSG00000000460	C1orf112	protein_coding	1.93525	3.22255	1.94348	2.95763	2.92435	4.65571
ENSG00000162817	C1orf115	protein_coding	0.219607	0.403543	0.337086	0.269083	0.330101	0.437657
ENSG00000182795	C1orf116	protein_coding	0.053244	0.13782	0.093357	0.037462	0.054538	0.049405
ENSG00000197982	C1orf122	protein_coding	7.52568	4.43983	5.20731	10.282	5.28916	5.2668
ENSG00000162384	C1orf123	protein_coding	8.82134	9.41959	5.71249	9.74105	6.62559	11.5947
ENSG00000175262	C1orf127	protein_coding	0	0.075162	0.061946	0.066734	0.096447	0.047021
ENSG00000143633	C1orf131	protein_coding	4.19521	2.73931	4.06088	2.11403	2.93576	3.27442
ENSG00000203910	C1orf146	protein_coding	0	0	0	0	0	0
ENSG00000131591	C1orf159	protein_coding	4.63231	6.14332	5.61894	12.4782	6.42699	8.94168
ENSG00000143110	C1orf162	protein_coding	16.1432	18.9735	15.6368	29.8181	15.0568	26.8623
ENSG00000215910	C1orf167	protein_coding	0.170947	0.113294	0.177733	0.266769	0.107943	0.051617
ENSG00000198912	C1orf174	protein_coding	9.48402	8.47002	8.87447	9.20283	8.86027	8.58026
ENSG00000163263	C1orf189	protein_coding	0.31943	0.435178	0.471077	0.085405	0.158584	0
ENSG00000179902	C1orf194	protein_coding	0	0	0	0	0	0
ENSG00000119280	C1orf198	protein_coding	1.43587	1.99956	1.67225	1.44886	1.65519	1.11042
ENSG00000116667	C1orf21	protein_coding	2.90691	1.84069	1.04905	0.785295	2.89794	1.05532
ENSG00000142686	C1orf216	protein_coding	1.65905	1.70445	1.22888	3.69711	2.06249	3.64111
ENSG00000239887	C1orf226	protein_coding	0.023628	0	0	0	0	0
ENSG00000143793	C1orf35	protein_coding	5.47474	5.81355	8.69423	8.62988	6.3472	6.60772
ENSG00000143612	C1orf43	protein_coding	28.6552	27.4563	32.2637	30.6379	27.6301	27.3067
ENSG00000164008	C1orf50	protein_coding	9.26019	9.29889	10.1491	4.75639	8.34431	7.33622
ENSG00000162642	C1orf52	protein_coding	17.6036	14.3228	17.8353	9.36858	19.0813	13.2178
ENSG00000203724	C1orf53	protein_coding	0	0	0	0	0	0
ENSG00000118292	C1orf54	protein_coding	2.20973	2.28153	3.00906	1.09755	2.24537	1.62777
ENSG00000143443	C1orf56	protein_coding	1.13244	1.59417	1.22476	1.42012	1.1772	1.17427
ENSG00000125462	C1orf61	protein_coding	0.144185	0.162592	0	0.512957	0	0.326754
ENSG00000162757	C1orf74	protein_coding	0.423443	0.592434	0.524342	0.531504	0.512609	0.409178
ENSG00000162598	C1orf87	protein_coding	0	0.044223	0	0	0	0
ENSG00000173372	C1QA	protein_coding	0.744819	0.29437	0.074817	8.13818	4.25035	0.923613
ENSG00000173369	C1QB	protein_coding	0	0	0	3.94309	0.262788	0.090365
ENSG00000108561	C1QBP	protein_coding	33.0999	35.2668	30.6013	46.2818	32.5422	35.7041
ENSG00000159189	C1QC	protein_coding	0	0	0	2.06936	0.501185	0
ENSG00000165985	C1QL3	protein_coding	0.07821	0.095805	0.171284	0.069274	0.080112	0.041688
ENSG00000173918	C1QTNF1	protein_coding	0.0198	0	0.102619	0	0	0
ENSG00000184163	C1QTNF12	protein_coding	1.14425	1.62936	1.68354	0.868484	1.21586	0.976952
ENSG00000082196	C1QTNF3	protein_coding	3.55294	3.38868	3.88772	1.6259	3.42255	2.29094
ENSG00000172247	C1QTNF4	protein_coding	0.873535	0.274299	0.051392	1.12723	0.534663	0.848527
ENSG00000223953	C1QTNF5	protein_coding	0.252387	0	0	0	0	0
ENSG00000133466	C1QTNF6	protein_coding	2.77481	3.77205	4.66578	4.11011	4.11141	3.13204
ENSG00000163145	C1QTNF7	protein_coding	0	0.063826	0	0	0.014692	0
ENSG00000240654	C1QTNF9	protein_coding	0	0.049558	0	0.004037	0.055496	0.014296
ENSG00000159403	C1R	protein_coding	1.53503	1.75116	1.96479	1.06349	1.77663	1.50663
ENSG00000139178	C1RL	protein_coding	8.83436	11.523	10.1963	14.3561	9.27559	11.5417
ENSG00000182326	C1S	protein_coding	0.52614	0.730391	1.0705	0.399181	0.779289	0.605422
ENSG00000166278	C2	protein_coding	1.19789	0.989824	1.74487	3.00112	2.14664	1.61924
ENSG00000149609	C20orf144	protein_coding	0	0	0	0.169476	0.174885	0
ENSG00000125975	C20orf173	protein_coding	0.08311	0	0	0	0	0
ENSG00000088854	C20orf194	protein_coding	3.48145	3.08267	3.06971	3.08051	3.71812	3.05671
ENSG00000215595	C20orf202	protein_coding	0.243115	0.131104	0.146399	0.125613	0.124513	0.396979
ENSG00000198547	C20orf203	protein_coding	0.32761	0.288346	0.491912	0.173113	0.354322	0.2522
ENSG00000196421	C20orf204	protein_coding	0	0.883034	2.19514	0.740524	0	0
ENSG00000101220	C20orf27	protein_coding	8.18088	8.00124	6.46601	26.0722	9.34718	8.49702
ENSG00000196476	C20orf96	protein_coding	0.780171	0.924254	1.06409	0.616074	0.847196	1.01458
ENSG00000222018	C21orf140	protein_coding	0.012036	0	0	0	0	0.01349
ENSG00000160226	C21orf2	protein_coding	14.2724	15.3708	10.9849	17.2515	15.1129	17.3115
ENSG00000160298	C21orf58	protein_coding	1.42972	2.10937	2.69318	3.60572	3.32204	2.99109
ENSG00000205929	C21orf62	protein_coding	0	0.072828	0	0	0	0
ENSG00000154642	C21orf91	protein_coding	11.3227	9.66485	7.44926	10.3881	9.20405	10.4801
ENSG00000169314	C22orf15	protein_coding	0.36055	0	0.503384	0.317564	0.241654	0.12088
ENSG00000128346	C22orf23	protein_coding	0.178013	0.467435	0.302433	0.263848	0.318965	0.503483
ENSG00000242259	C22orf39	protein_coding	14.5562	12.8025	10.8085	9.12071	10.5089	9.54554
ENSG00000184208	C22orf46	protein_coding	1.49567	1.9489	1.91671	2.32936	1.80891	2.90155
ENSG00000157617	C2CD2	protein_coding	2.83331	2.60216	2.21447	2.91853	2.56512	2.4841
ENSG00000172375	C2CD2L	protein_coding	4.11433	4.52576	3.70741	8.6598	4.71894	7.31742
ENSG00000168014	C2CD3	protein_coding	10.0396	11.141	11.5753	8.54323	11.8109	14.4796
ENSG00000198535	C2CD4A	protein_coding	0	0.072844	0.024658	0.01671	0	0.04934
ENSG00000205502	C2CD4B	protein_coding	0.123482	0	0.054158	0	0	0
ENSG00000183186	C2CD4C	protein_coding	0	0	0	0	0	0
ENSG00000225556	C2CD4D	protein_coding	0.8961	0.787809	0.231222	0.793902	0.500549	0.596163
ENSG00000111731	C2CD5	protein_coding	15.1913	16.2279	15.3371	14.5252	14.5614	18.4593
ENSG00000155754	C2CD6	protein_coding	0.035373	0.040618	0.069815	0.022274	0.060389	0.020558
ENSG00000273045	C2orf15	protein_coding	0.58388	0.293335	0.815489	0.363367	0.338056	0.803989
ENSG00000221843	C2orf16	protein_coding	0.002097	0.013567	0	0.018477	0.032213	0
ENSG00000119147	C2orf40	protein_coding	0.783887	0.415492	0.50697	0.364808	0.704952	0.428235
ENSG00000115998	C2orf42	protein_coding	6.43385	4.47272	5.11275	5.66803	4.63981	8.14092
[truncated: 31,892 more rows]
