# Supplementary material for: RNA sequencing of CD4 T-cells reveals the relationships between lncRNA-mRNA co-expression in elite controller vs. HIV-positive infected patients
Source: PeerJ. 2020 Apr 21;8:e8911. doi: 10.7717/peerj.8911 (PMC7182024; doi:10.7717/peerj.8911)
Supplement: Table S4 [file peerj-08-8911-s008.xlsx]

## Sheet: mRNA
Differentially expressed mRNAs in health controls (HCs) vs. elite controllers (ECs)
transcript_id	gene_id	gene_name	feature_id	ECs_FPKM	HCs_FPKM	log2(foldchange)	pvalue	qvalue	regulation
ENST00000361059	ENSG00000280987	MATR3	transcript	0	88.1156	#NAME?	4.43906e-13	5.01783e-08	down
ENST00000623724	ENSG00000161405	IKZF3	transcript	0	24.8651	#NAME?	1.76534e-12	9.97751e-08	down
ENST00000370016	ENSG00000089820	ARHGAP4	transcript	101.021	0	Inf	8.47364e-12	3.09427e-07	up
ENST00000647103	ENSG00000159023	EPB41	transcript	0	37.4359	#NAME?	1.09495e-11	3.09427e-07	down
ENST00000375647	ENSG00000184677	ZBTB40	transcript	12.523	0	Inf	6.05067e-11	1.13993e-06	up
ENST00000537233	ENSG00000262246	CORO7	transcript	31.0502	0	Inf	7.71765e-11	1.24288e-06	up
ENST00000333175	ENSG00000182087	TMEM259	transcript	43.3211	0	Inf	8.79622e-11	1.24288e-06	up
ENST00000426496	ENSG00000117523	PRRC2C	transcript	0.001127	14.184	-13.6195	1.25148e-10	1.57184e-06	down
ENST00000616147	ENSG00000141506	PIK3R5	transcript	23.5122	0	Inf	2.52615e-10	2.85551e-06	up
ENST00000389562	ENSG00000183495	EP400	transcript	6.02878	0	Inf	3.20003e-10	3.28841e-06	up
ENST00000338179	ENSG00000143815	LBR	transcript	15.4899	0	Inf	1.08094e-09	1.01823e-05	up
ENST00000564845	ENSG00000177200	CHD9	transcript	5.35476	0	Inf	1.19716e-09	1.04096e-05	up
ENST00000418622	ENSG00000107036	RIC1	transcript	8.16235	0	Inf	1.53417e-09	1.23871e-05	up
ENST00000355260	ENSG00000110713	NUP98	transcript	10.1167	0	Inf	4.50873e-09	3.18536e-05	up
ENST00000409750	ENSG00000169629	RGPD8	transcript	11.8823	0	Inf	5.21939e-09	3.47053e-05	up
ENST00000357955	ENSG00000114738	MAPKAPK3	transcript	26.1625	0	Inf	7.0971e-09	4.4569e-05	up
ENST00000592576	ENSG00000108883	EFTUD2	transcript	10.6251	0	Inf	1.23987e-08	6.67394e-05	up
ENST00000396391	ENSG00000062598	ELMO2	transcript	12.1149	0	Inf	1.73451e-08	8.83046e-05	up
ENST00000554021	ENSG00000100650	SRSF5	transcript	55.0867	0	Inf	1.86334e-08	8.83046e-05	up
ENST00000348127	ENSG00000106348	IMPDH1	transcript	0	12.6773	#NAME?	1.91717e-08	8.83046e-05	down
ENST00000582556	ENSG00000161970	RPL26	transcript	78.152	0	Inf	1.95298e-08	8.83046e-05	up
ENST00000336057	ENSG00000108840	HDAC5	transcript	5.86606	0	Inf	2.28968e-08	9.95465e-05	up
ENST00000477593	ENSG00000051382	PIK3CB	transcript	7.16154	0	Inf	2.61808e-08	0.000109609	up
ENST00000555462	ENSG00000100796	PPP4R3A	transcript	17.6647	0.020386	9.75908	3.48601e-08	0.000130772	up
ENST00000644780	ENSG00000159023	EPB41	transcript	6.4589	0	Inf	3.51779e-08	0.000130772	up
ENST00000619101	ENSG00000084093	REST	transcript	15.5123	0.0295665	9.03524	3.58633e-08	0.000130772	up
ENST00000614785	ENSG00000263956	NBPF11	transcript	0	6.46757	#NAME?	3.79861e-08	0.000134183	down
ENST00000268893	ENSG00000005379	TSPOAP1	transcript	3.71982	0	Inf	4.37746e-08	0.000147927	up
ENST00000394269	ENSG00000070814	TCOF1	transcript	7.39383	0	Inf	4.6372e-08	0.000149766	up
ENST00000452673	ENSG00000127022	CANX	transcript	0	10.5808	#NAME?	4.92119e-08	0.000154523	down
ENST00000394706	ENSG00000145348	TBCK	transcript	0	7.49444	#NAME?	5.38042e-08	0.000164376	down
ENST00000320912	ENSG00000179010	MRFAP1	transcript	15.8541	0	Inf	5.74434e-08	0.000170876	up
ENST00000645005	ENSG00000111642	CHD4	transcript	3.62302	0	Inf	7.64234e-08	0.000213362	up
ENST00000503393	ENSG00000087266	SH3BP2	transcript	14.4464	0.010286	10.4558	7.68816e-08	0.000213362	up
ENST00000557450	ENSG00000126214	KLC1	transcript	9.87228	0	Inf	7.73884e-08	0.000213362	up
ENST00000612687	ENSG00000149428	HYOU1	transcript	6.43187	0	Inf	7.93204e-08	0.000213481	up
ENST00000616317	ENSG00000278540	ACACA	transcript	0.005254	5.38617	-10.0016	8.82062e-08	0.000228898	down
ENST00000367840	ENSG00000143164	DCAF6	transcript	0	6.47459	#NAME?	9.23821e-08	0.000229235	down
ENST00000510533	ENSG00000137601	NEK1	transcript	0	4.04309	#NAME?	9.32855e-08	0.000229235	down
ENST00000538733	ENSG00000110931	CAMKK2	transcript	4.46178	0	Inf	9.91705e-08	0.000238511	up
ENST00000613060	ENSG00000131389	SLC6A6	transcript	7.61826	0.0030265	11.2976	1.18112e-07	0.00027815	up
ENST00000428287	ENSG00000080345	RIF1	transcript	2.56776	0	Inf	1.24136e-07	0.00028637	up
ENST00000544334	ENSG00000141564	RPTOR	transcript	3.47367	0	Inf	1.27335e-07	0.000287874	up
ENST00000619223	ENSG00000091592	NLRP1	transcript	4.09246	0	Inf	1.32067e-07	0.000292718	up
ENST00000344700	ENSG00000124614	RPS10	transcript	29.0426	0	Inf	1.44084e-07	0.000313212	up
ENST00000366668	ENSG00000135775	COG2	transcript	6.55359	0	Inf	1.51612e-07	0.000323357	up
ENST00000357089	ENSG00000158062	UBXN11	transcript	12.0339	0	Inf	1.59846e-07	0.000334604	up
ENST00000457361	ENSG00000030419	IKZF2	transcript	0	2.89435	#NAME?	1.6625e-07	0.000335848	down
ENST00000434248	ENSG00000128000	ZNF780B	transcript	0	2.16147	#NAME?	1.66382e-07	0.000335848	down
ENST00000560410	ENSG00000100911	PSME2	transcript	0	23.255	#NAME?	2.08488e-07	0.000406328	down
ENST00000394566	ENSG00000172716	SLFN11	transcript	4.50495	0	Inf	2.23239e-07	0.000427703	up
ENST00000381232	ENSG00000197555	SIPA1L1	transcript	6.05613	0.007413	9.67412	2.3043e-07	0.000434123	up
ENST00000629669	ENSG00000078070	MCCC1	transcript	7.12838	0	Inf	2.35325e-07	0.000436076	up
ENST00000524624	ENSG00000104529	EEF1D	transcript	0	16.0678	#NAME?	2.95247e-07	0.000538293	down
ENST00000453196	ENSG00000100503	NIN	transcript	0	2.35009	#NAME?	3.11533e-07	0.000549057	down
ENST00000545251	ENSG00000235750	KIAA0040	transcript	6.22725	0	Inf	3.14265e-07	0.000549057	up
ENST00000372802	ENSG00000131236	CAP1	transcript	5.58548	0	Inf	3.17269e-07	0.000549057	up
ENST00000415217	ENSG00000151651	ADAM8	transcript	5.03101	0	Inf	3.20581e-07	0.000549057	up
ENST00000548807	ENSG00000008517	IL32	transcript	0	19.2545	#NAME?	3.37918e-07	0.00055228	down
ENST00000356508	ENSG00000105223	PLD3	transcript	0	8.17599	#NAME?	3.5062e-07	0.00055228	down
ENST00000527403	ENSG00000110075	PPP6R3	transcript	4.22199	0	Inf	3.57564e-07	0.00055228	up
ENST00000346872	ENSG00000161405	IKZF3	transcript	32.2524	0.236901	7.08898	3.59804e-07	0.00055228	up
ENST00000296288	ENSG00000163930	BAP1	transcript	4.37859	0	Inf	3.62432e-07	0.00055228	up
ENST00000577119	ENSG00000091592	NLRP1	transcript	3.51845	0	Inf	3.66255e-07	0.00055228	up
ENST00000251268	ENSG00000105429	MEGF8	transcript	2.44326	0	Inf	3.66434e-07	0.00055228	up
ENST00000536983	ENSG00000175567	UCP2	transcript	0	10.9016	#NAME?	3.80454e-07	0.000565865	down
ENST00000242059	ENSG00000136193	SCRN1	transcript	3.58386	0	Inf	3.89606e-07	0.000571951	up
ENST00000534366	ENSG00000179832	MROH1	transcript	9.03634	0.00962	9.87549	4.12824e-07	0.000598267	up
ENST00000548139	ENSG00000123329	ARHGAP9	transcript	14.5062	0	Inf	4.57829e-07	0.000647733	up
ENST00000399219	ENSG00000165688	PMPCA	transcript	0	7.201	#NAME?	4.58418e-07	0.000647733	down
ENST00000645460	ENSG00000127616	SMARCA4	transcript	6.41859	0.0109095	9.20053	4.67961e-07	0.000653054	up
ENST00000600429	ENSG00000090554	FLT3LG	transcript	15.9096	0	Inf	4.85215e-07	0.000660817	up
ENST00000337540	ENSG00000155256	ZFYVE27	transcript	0	4.8103	#NAME?	5.06408e-07	0.000681469	down
ENST00000614428	ENSG00000278540	ACACA	transcript	5.41459	0.009532	9.14986	5.80534e-07	0.000763051	up
ENST00000445299	ENSG00000119231	SENP5	transcript	0	5.37633	#NAME?	5.90235e-07	0.000766884	down
ENST00000580301	ENSG00000109065	NAT9	transcript	7.08531	0	Inf	6.50373e-07	0.00083016	up
ENST00000394869	ENSG00000108262	GIT1	transcript	8.36387	0.013436	9.28192	7.26722e-07	0.000892905	up
ENST00000644759	ENSG00000122406	RPL5	transcript	151.889	0.911088	7.38121	8.24875e-07	0.000991939	up
ENST00000409197	ENSG00000077380	DYNC1I2	transcript	4.66395	0	Inf	8.39991e-07	0.000999483	up
ENST00000564817	ENSG00000102901	CENPT	transcript	7.32291	0	Inf	8.65342e-07	0.00101892	up
ENST00000382041	ENSG00000100503	NIN	transcript	0	1.87161	#NAME?	9.18236e-07	0.00107006	down
ENST00000625927	ENSG00000060971	ACAA1	transcript	6.65925	0	Inf	9.63856e-07	0.00111176	up
ENST00000394127	ENSG00000008838	MED24	transcript	8.53257	0.029454	8.17837	1.02393e-06	0.00115743	up
ENST00000526522	ENSG00000140988	RPS2	transcript	25.7159	0	Inf	1.19561e-06	0.00133811	up
ENST00000399448	ENSG00000111679	PTPN6	transcript	8.27424	0	Inf	1.24365e-06	0.00137823	up
ENST00000357505	ENSG00000244754	N4BP2L2	transcript	3.82774	0	Inf	1.31045e-06	0.00143816	up
ENST00000531407	ENSG00000172757	CFL1	transcript	28.7392	0	Inf	1.3587e-06	0.00147465	up
ENST00000366959	ENSG00000136643	RPS6KC1	transcript	0	2.24704	#NAME?	1.36979e-06	0.00147465	down
ENST00000394697	ENSG00000121281	ADCY7	transcript	0.000961	3.68836	-11.9062	1.62414e-06	0.00171579	down
ENST00000514682	ENSG00000145425	RPS3A	transcript	10.9096	0	Inf	1.68535e-06	0.00176397	up
ENST00000393053	ENSG00000120802	TMPO	transcript	5.97361	0	Inf	1.72781e-06	0.00179182	up
ENST00000541492	ENSG00000100014	SPECC1L	transcript	3.22191	0	Inf	2.01339e-06	0.00201407	up
ENST00000511071	ENSG00000159733	ZFYVE28	transcript	0	3.28097	#NAME?	2.09495e-06	0.00207727	down
ENST00000644371	ENSG00000011198	ABHD5	transcript	1.89205	0	Inf	2.2858e-06	0.0022468	up
ENST00000376266	ENSG00000204536	CCHCR1	transcript	4.00669	0	Inf	2.34633e-06	0.00228642	up
ENST00000545125	ENSG00000213015	ZNF580	transcript	9.82987	0	Inf	2.38814e-06	0.00230048	up
ENST00000354831	ENSG00000078618	NRDC	transcript	2.80922	0	Inf	2.40146e-06	0.00230048	up
ENST00000380045	ENSG00000047634	SCML1	transcript	5.09101	0	Inf	2.57783e-06	0.00244868	up
ENST00000619085	ENSG00000213654	GPSM3	transcript	8.3872	0	Inf	2.7088e-06	0.00255165	up
ENST00000376554	ENSG00000102572	STK24	transcript	2.73379	0	Inf	3.04403e-06	0.00284373	up
ENST00000614015	ENSG00000263956	NBPF11	transcript	3.6767	0	Inf	3.36673e-06	0.00310925	up
ENST00000333611	ENSG00000182541	LIMK2	transcript	4.142	0	Inf	3.38327e-06	0.00310925	up
ENST00000449757	ENSG00000198563	DDX39B	transcript	15.97	0	Inf	3.6958e-06	0.00334212	up
ENST00000540243	ENSG00000143033	MTF2	transcript	0	5.40797	#NAME?	3.91748e-06	0.0035009	down
ENST00000302907	ENSG00000170889	RPS9	transcript	0	12.716	#NAME?	3.93332e-06	0.0035009	down
ENST00000409057	ENSG00000163939	PBRM1	transcript	3.93185	0.002243	10.7756	3.97117e-06	0.00350698	up
ENST00000359606	ENSG00000078699	CBFA2T2	transcript	4.55353	0.033242	7.09784	4.06306e-06	0.00356031	up
ENST00000433667	ENSG00000122515	ZMIZ2	transcript	2.41383	0	Inf	4.18084e-06	0.00360758	up
ENST00000409933	ENSG00000119844	AFTPH	transcript	4.16695	0	Inf	4.28118e-06	0.00364346	up
ENST00000415719	ENSG00000174748	RPL15	transcript	0	11.1746	#NAME?	4.28688e-06	0.00364346	down
ENST00000504730	ENSG00000156136	DCK	transcript	0	4.75446	#NAME?	4.40117e-06	0.00371269	down
ENST00000367264	ENSG00000117139	KDM5B	transcript	8.04422	0.062602	7.0056	4.67852e-06	0.00388861	up
ENST00000397341	ENSG00000100813	ACIN1	transcript	3.2509	0	Inf	4.71514e-06	0.00389044	up
ENST00000426154	ENSG00000136193	SCRN1	transcript	0.002684	2.10694	-9.61655	5.53382e-06	0.00453284	down
ENST00000311638	ENSG00000174796	THAP6	transcript	0	2.75984	#NAME?	6.54001e-06	0.0052974	down
ENST00000396560	ENSG00000166669	ATF7IP2	transcript	2.92078	0.0001135	14.6514	6.83942e-06	0.00548308	up
ENST00000352210	ENSG00000143224	PPOX	transcript	6.53278	0.0075325	9.76035	7.81969e-06	0.00622481	up
ENST00000409338	ENSG00000257529	RPL36A-HNRNPH2	transcript	14.0456	0	Inf	8.16697e-06	0.0064546	up
ENST00000630539	ENSG00000049656	CLPTM1L	transcript	3.9012	0	Inf	8.22257e-06	0.0064546	up
ENST00000287546	ENSG00000156931	VPS8	transcript	5.18288	0.0112255	8.85083	8.49543e-06	0.00661816	up
ENST00000262059	ENSG00000012822	CALCOCO1	transcript	0	1.36075	#NAME?	9.15077e-06	0.00698909	down
ENST00000382448	ENSG00000168970	JMJD7-PLA2G4B	transcript	0	7.7229	#NAME?	9.67473e-06	0.00729075	down
ENST00000396253	ENSG00000110756	HPS5	transcript	1.70355	0	Inf	9.77544e-06	0.00731786	up
ENST00000315544	ENSG00000080802	CNOT4	transcript	2.06585	0	Inf	1.01292e-05	0.00753281	up
ENST00000643374	ENSG00000094631	HDAC6	transcript	0	1.94494	#NAME?	1.0741e-05	0.00793555	down
ENST00000629305	ENSG00000204120	GIGYF2	transcript	2.00097	0	Inf	1.11743e-05	0.00814919	up
ENST00000399012	ENSG00000182378	PLCXD1	transcript	0	1.85716	#NAME?	1.12582e-05	0.00815769	down
ENST00000329043	ENSG00000170448	NFXL1	transcript	0.003441	3.95383	-10.1662	1.16697e-05	0.00827916	down
ENST00000243639	ENSG00000204604	ZNF468	transcript	0	1.92952	#NAME?	1.24323e-05	0.00872871	down
ENST00000644600	ENSG00000159023	EPB41	transcript	0	4.44851	#NAME?	1.26508e-05	0.00882729	down
ENST00000537440	ENSG00000043514	TRIT1	transcript	3.5305	0	Inf	1.32356e-05	0.00912271	up
ENST00000396268	ENSG00000204536	CCHCR1	transcript	0	2.51616	#NAME?	1.35589e-05	0.00923544	down
ENST00000325656	ENSG00000175544	CABP4	transcript	2.79621	0	Inf	1.62517e-05	0.0109349	up
ENST00000438527	ENSG00000125485	DDX31	transcript	2.61409	0	Inf	1.7363e-05	0.0116135	up
ENST00000402077	ENSG00000100379	KCTD17	transcript	0	4.16824	#NAME?	1.75932e-05	0.011648	down
ENST00000372210	ENSG00000130717	UCK1	transcript	3.30013	0	Inf	1.77796e-05	0.0116738	up
ENST00000372972	ENSG00000101811	CSTF2	transcript	3.41047	0	Inf	1.81205e-05	0.0117462	up
ENST00000309060	ENSG00000174306	ZHX3	transcript	0.708344	0	Inf	1.81849e-05	0.0117462	up
ENST00000529554	ENSG00000134802	SLC43A3	transcript	3.45249	0	Inf	1.95725e-05	0.0124231	up
ENST00000426651	ENSG00000148303	RPL7A	transcript	0	6.34807	#NAME?	1.96474e-05	0.0124231	down
ENST00000413574	ENSG00000213923	CSNK1E	transcript	6.51582	0.020333	8.32398	1.96725e-05	0.0124231	up
ENST00000361125	ENSG00000198742	SMURF1	transcript	0.146981	9.33593	-5.98909	2.26225e-05	0.0141282	down
ENST00000379089	ENSG00000164970	FAM219A	transcript	2.02368	0	Inf	2.35539e-05	0.0145573	up
ENST00000341832	ENSG00000248333	CDK11B	transcript	3.90215	0	Inf	2.43381e-05	0.014791	up
ENST00000300441	ENSG00000167107	ACSF2	transcript	2.79565	0	Inf	2.47964e-05	0.014989	up
ENST00000611091	ENSG00000167842	MIS12	transcript	2.276	0	Inf	2.54552e-05	0.0153054	up
ENST00000474289	ENSG00000093144	ECHDC1	transcript	3.60769	0.0002635	13.741	2.56267e-05	0.0153269	up
ENST00000372384	ENSG00000157514	TSC22D3	transcript	0.001674	4.38377	-11.3547	2.61418e-05	0.0155527	down
ENST00000646713	ENSG00000113163	COL4A3BP	transcript	0	2.04365	#NAME?	2.66511e-05	0.0157727	down
ENST00000519401	ENSG00000164808	SPIDR	transcript	2.87242	0	Inf	2.738e-05	0.0159254	up
ENST00000437912	ENSG00000170113	NIPA1	transcript	0.005676	1.60668	-8.14499	2.73889e-05	0.0159254	down
ENST00000452837	ENSG00000134077	THUMPD3	transcript	0	2.13605	#NAME?	2.80968e-05	0.0162041	down
ENST00000619707	ENSG00000147894	C9orf72	transcript	4.99217	0.0014335	11.7659	2.8274e-05	0.0162235	up
ENST00000430710	ENSG00000100888	CHD8	transcript	1.5613	0.002845	9.1001	2.91203e-05	0.0166248	up
ENST00000394303	ENSG00000067191	CACNB1	transcript	0.001603	2.12814	-10.3746	3.08108e-05	0.0175015	down
ENST00000360265	ENSG00000196526	AFAP1	transcript	1.81273	0.012703	7.15685	3.13421e-05	0.0176473	up
ENST00000401424	ENSG00000133794	ARNTL	transcript	3.63822	0	Inf	3.44887e-05	0.0192997	up
ENST00000262301	ENSG00000103227	LMF1	transcript	8.91904	0.0546285	7.35109	3.60306e-05	0.0199823	up
ENST00000647508	ENSG00000073584	SMARCE1	transcript	2.57146	0	Inf	3.6062e-05	0.0199823	up
ENST00000378345	ENSG00000176715	ACSF3	transcript	0	3.7657	#NAME?	3.64667e-05	0.0200205	down
ENST00000426034	ENSG00000088543	C3orf18	transcript	2.26626	0	Inf	3.64853e-05	0.0200205	up
ENST00000382401	ENSG00000137449	CPEB2	transcript	1.37459	0.002133	9.3319	3.75314e-05	0.0204951	up
ENST00000548044	ENSG00000187109	NAP1L1	transcript	0	4.42976	#NAME?	3.8156e-05	0.0207359	down
ENST00000413890	ENSG00000126777	KTN1	transcript	0.0107675	2.51512	-7.8678	3.86277e-05	0.0208918	down
ENST00000447614	ENSG00000105393	BABAM1	transcript	6.22753	0	Inf	4.04206e-05	0.0216543	up
ENST00000622827	ENSG00000107736	CDH23	transcript	0.625944	0	Inf	4.27436e-05	0.0226838	up
ENST00000519574	ENSG00000179921	GPBAR1	transcript	5.98222	0	Inf	4.32936e-05	0.0228683	up
ENST00000421276	ENSG00000093167	LRRFIP2	transcript	2.17314	0	Inf	4.53124e-05	0.0236844	up
ENST00000634702	ENSG00000071054	MAP4K4	transcript	1.38034	0	Inf	4.769e-05	0.024591	up
ENST00000398527	ENSG00000005302	MSL3	transcript	0.0935315	8.48616	-6.50352	4.78601e-05	0.024591	down
ENST00000357568	ENSG00000092529	CAPN3	transcript	2.65352	0.0007525	11.7839	4.83265e-05	0.0247182	up
ENST00000560031	ENSG00000156958	GALK2	transcript	2.55091	0	Inf	4.92898e-05	0.0250974	up
ENST00000371591	ENSG00000157077	ZFYVE9	transcript	0	1.1084	#NAME?	5.03235e-05	0.0253709	down
ENST00000339997	ENSG00000133318	RTN3	transcript	1.07343	0	Inf	5.10344e-05	0.0253709	up
ENST00000336237	ENSG00000003509	NDUFAF7	transcript	2.93845	0	Inf	5.10771e-05	0.0253709	up
ENST00000622445	ENSG00000067191	CACNB1	transcript	2.81431	0.012885	7.77094	5.11472e-05	0.0253709	up
ENST00000418897	ENSG00000198563	DDX39B	transcript	8.94085	0	Inf	5.11737e-05	0.0253709	up
ENST00000356200	ENSG00000008128	CDK11A	transcript	1.96616	0	Inf	5.3048e-05	0.0261854	up
ENST00000262640	ENSG00000124333	VAMP7	transcript	3.07147	0	Inf	5.33921e-05	0.0262406	up
ENST00000404249	ENSG00000008128	CDK11A	transcript	2.06542	0	Inf	5.40836e-05	0.0264654	up
ENST00000211998	ENSG00000035403	VCL	transcript	0.186795	9.76123	-5.70754	5.43534e-05	0.0264827	down
ENST00000393283	ENSG00000015568	RGPD5	transcript	7.51612	0.0869625	6.43345	5.58065e-05	0.0270741	up
ENST00000395693	ENSG00000130489	SCO2	transcript	8.5593	0	Inf	5.73101e-05	0.027619	up
ENST00000456470	ENSG00000100379	KCTD17	transcript	3.64518	0	Inf	5.74185e-05	0.027619	up
ENST00000314349	ENSG00000105197	TIMM50	transcript	0.0343195	6.4382	-7.55149	5.86058e-05	0.0280707	down
ENST00000346817	ENSG00000003400	CASP10	transcript	3.1887	0	Inf	5.91964e-05	0.0282339	up
ENST00000550366	ENSG00000129493	HEATR5A	transcript	0	2.0269	#NAME?	6.4058e-05	0.0302421	down
ENST00000358779	ENSG00000008128	CDK11A	transcript	1.98267	0	Inf	6.42102e-05	0.0302421	up
ENST00000377350	ENSG00000168067	MAP4K2	transcript	1.6333	0	Inf	6.46737e-05	0.0302421	up
ENST00000359337	ENSG00000196576	PLXNB2	transcript	0	0.984252	#NAME?	6.47444e-05	0.0302421	down
ENST00000479134	ENSG00000168297	PXK	transcript	2.59877	0	Inf	6.82844e-05	0.0315438	up
ENST00000330914	ENSG00000196230	TUBB	transcript	1.79545	0	Inf	6.83684e-05	0.0315438	up
ENST00000613507	ENSG00000111913	RIPOR2	transcript	0	3.33361	#NAME?	6.86988e-05	0.0315674	down
ENST00000416206	ENSG00000125991	ERGIC3	transcript	0.215909	15.5423	-6.16963	7.26025e-05	0.0329592	down
ENST00000507469	ENSG00000116698	SMG7	transcript	0	1.9857	#NAME?	7.84253e-05	0.0353189	down
ENST00000644252	ENSG00000111817	DSE	transcript	0.434965	0	Inf	7.98147e-05	0.0356605	up
ENST00000494284	ENSG00000118482	PHF3	transcript	0	1.70192	#NAME?	8.09282e-05	0.0360156	down
ENST00000427526	ENSG00000105486	LIG1	transcript	1.52092	0	Inf	8.12775e-05	0.0360292	up
ENST00000640138	ENSG00000108433	GOSR2	transcript	3.90682	0.025871	7.23851	8.20929e-05	0.0362485	up
ENST00000329047	ENSG00000184640	SEPT9	transcript	74.17	0	Inf	8.29267e-05	0.0363785	up
ENST00000393101	ENSG00000120798	NR2C1	transcript	2.62075	0	Inf	8.31716e-05	0.0363785	up
ENST00000358293	ENSG00000196227	FAM217B	transcript	1.38088	0.00284	8.92548	8.33527e-05	0.0363785	up
ENST00000568631	ENSG00000205937	RNPS1	transcript	2.48043	0	Inf	8.76997e-05	0.0381285	up
ENST00000374574	ENSG00000204217	BMPR2	transcript	0	0.463497	#NAME?	9.06549e-05	0.0392623	down
ENST00000437155	ENSG00000182944	EWSR1	transcript	0	5.94915	#NAME?	9.34277e-05	0.0403087	down
ENST00000633930	ENSG00000204131	NHSL2	transcript	0.939684	0	Inf	9.44532e-05	0.0405962	up
ENST00000374182	ENSG00000107643	MAPK8	transcript	0.835939	0	Inf	9.72337e-05	0.0416224	up
ENST00000284995	ENSG00000154743	TSEN2	transcript	0	1.90585	#NAME?	9.75773e-05	0.0416224	down
ENST00000383024	ENSG00000128191	DGCR8	transcript	1.48778	0.0013775	10.0769	9.93447e-05	0.042217	up
ENST00000622850	ENSG00000079459	FDFT1	transcript	3.21504	0	Inf	9.97353e-05	0.0422178	up
ENST00000437004	ENSG00000058272	PPP1R12A	transcript	0	2.07981	#NAME?	0.000100094	0.0422178	down
ENST00000261817	ENSG00000110801	PSMD9	transcript	0	1.86394	#NAME?	0.000102933	0.0430939	down
ENST00000395127	ENSG00000055332	EIF2AK2	transcript	1.04176	0	Inf	0.000105487	0.044	up
ENST00000409579	ENSG00000144218	AFF3	transcript	2.7568	0.031743	6.44041	0.000107444	0.0446515	up
ENST00000488267	ENSG00000163950	SLBP	transcript	0	4.37617	#NAME?	0.000108909	0.0450019	down
ENST00000528746	ENSG00000170325	PRDM10	transcript	0.000233	0.947352	-11.9894	0.000109312	0.0450019	down
ENST00000342173	ENSG00000117543	DPH5	transcript	3.56745	0	Inf	0.000109481	0.0450019	up
ENST00000427177	ENSG00000184640	SEPT9	transcript	55.1365	0	Inf	0.00011079	0.045375	up
ENST00000243810	ENSG00000185404	SP140L	transcript	1.87727	0	Inf	0.000113304	0.0460344	up
ENST00000354269	ENSG00000106348	IMPDH1	transcript	17.6632	0.104031	7.40758	0.000116595	0.0470704	up
ENST00000446256	ENSG00000132153	DHX30	transcript	1.10498	0	Inf	0.000118169	0.047536	up
ENST00000357702	ENSG00000136715	SAP130	transcript	2.16878	0.005977	8.50324	0.000122574	0.0490813	up
ENST00000588641	ENSG00000168259	DNAJC7	transcript	5.31216	0	Inf	0.000122879	0.0490813	up
ENST00000354411	ENSG00000091592	NLRP1	transcript	0.984086	0	Inf	0.000123325	0.0490859	up
ENST00000395532	ENSG00000178188	SH2B1	transcript	0	1.73281	#NAME?	0.000125591	0.0498123	down
ENST00000453382	ENSG00000012211	PRICKLE3	transcript	2.11293	0	Inf	0.000127594	0.0502542	up
ENST00000347529	ENSG00000159023	EPB41	transcript	15.9749	0.125233	6.99505	0.000131071	0.0509611	up
ENST00000358694	ENSG00000198561	CTNND1	transcript	0.631023	0	Inf	0.000131997	0.0510981	up
ENST00000335425	ENSG00000166405	RIC3	transcript	0.757956	0	Inf	0.000134303	0.0513044	up
ENST00000382095	ENSG00000182957	SPATA13	transcript	0	19.234	#NAME?	0.000134345	0.0513044	down
ENST00000373039	ENSG00000101052	IFT52	transcript	0	2.71814	#NAME?	0.000138138	0.0525751	down
ENST00000443940	ENSG00000132749	TESMIN	transcript	0	1.11587	#NAME?	0.000139311	0.0528437	down
ENST00000369038	ENSG00000143382	ADAMTSL4	transcript	1.76318	0	Inf	0.000142954	0.0540444	up
ENST00000456172	ENSG00000181315	ZNF322	transcript	0	0.823029	#NAME?	0.00014486	0.0545025	down
ENST00000439590	ENSG00000172809	RPL38	transcript	19.8215	0.129716	7.25556	0.000145131	0.0545025	up
ENST00000518444	ENSG00000161813	LARP4	transcript	0	1.71421	#NAME?	0.000149105	0.0556254	down
ENST00000259698	ENSG00000111913	RIPOR2	transcript	0	19.7133	#NAME?	0.000151364	0.0562826	down
ENST00000378603	ENSG00000134574	DDB2	transcript	0	4.95732	#NAME?	0.00015553	0.0572663	down
ENST00000423854	ENSG00000134759	ELP2	transcript	1.60973	0	Inf	0.000156144	0.057306	up
ENST00000356151	ENSG00000168297	PXK	transcript	0	1.87127	#NAME?	0.000157426	0.0575894	down
ENST00000411739	ENSG00000139350	NEDD1	transcript	2.2124	0	Inf	0.000161315	0.0588216	up
ENST00000601916	ENSG00000105662	CRTC1	transcript	2.28422	0	Inf	0.000162671	0.0590241	up
ENST00000456874	ENSG00000197057	DTHD1	transcript	0	1.10568	#NAME?	0.000162915	0.0590241	down
ENST00000368914	ENSG00000143434	SEMA6C	transcript	0	0.946172	#NAME?	0.000166617	0.0596124	down
ENST00000526816	ENSG00000028277	POU2F2	transcript	1.17581	0	Inf	0.000166648	0.0596124	up
ENST00000456259	ENSG00000138073	PREB	transcript	3.95943	0	Inf	0.000167634	0.0596245	up
ENST00000420312	ENSG00000112561	TFEB	transcript	1.84438	0	Inf	0.000167736	0.0596245	up
ENST00000398081	ENSG00000160209	PDXK	transcript	0.008734	2.65826	-8.24963	0.000168789	0.0598106	down
ENST00000357481	ENSG00000100813	ACIN1	transcript	1.6164	0	Inf	0.000171297	0.0601336	up
ENST00000454073	ENSG00000154957	ZNF18	transcript	1.60485	0	Inf	0.000174545	0.0608958	up
ENST00000539002	ENSG00000109390	NDUFC1	transcript	2.89157	0	Inf	0.000180869	0.0627803	up
ENST00000332968	ENSG00000215472	RPL17-C18orf32	transcript	0.000499	5.54808	-13.4407	0.000181057	0.0627803	down
ENST00000371120	ENSG00000125703	ATG4C	transcript	1.27351	0	Inf	0.000185388	0.0640854	up
ENST00000266027	ENSG00000114353	GNAI2	transcript	40.4098	0	Inf	0.000189338	0.0650529	up
ENST00000368969	ENSG00000143379	SETDB1	transcript	1.34526	0.004472	8.23275	0.000198282	0.0679195	up
ENST00000583369	ENSG00000109062	SLC9A3R1	transcript	1.36567	45.9917	-5.07369	0.000199282	0.0680556	down
ENST00000336184	ENSG00000082512	TRAF5	transcript	2.30562	0	Inf	0.000206027	0.0699999	up
ENST00000521726	ENSG00000156482	RPL30	transcript	9.21301	0.142922	6.01037	0.000206214	0.0699999	up
ENST00000398560	ENSG00000104728	ARHGEF10	transcript	0.00428	3.18527	-9.53959	0.000211313	0.0715161	down
ENST00000550345	ENSG00000152556	PFKM	transcript	0.0185675	2.14774	-6.8539	0.00021391	0.0720913	down
ENST00000368237	ENSG00000187862	TTC24	transcript	1.75335	0	Inf	0.000214288	0.0720913	up
ENST00000491935	ENSG00000130706	ADRM1	transcript	0	3.10971	#NAME?	0.000218542	0.0733044	down
ENST00000640495	ENSG00000108433	GOSR2	transcript	1.49311	0	Inf	0.000220343	0.0736372	up
ENST00000399774	ENSG00000015475	BID	transcript	0.0534495	4.72405	-6.4657	0.000220837	0.0736372	down
ENST00000424901	ENSG00000105221	AKT2	transcript	13.8105	0	Inf	0.000222614	0.0740112	up
ENST00000370007	ENSG00000166197	NOLC1	transcript	0	5.38304	#NAME?	0.000236653	0.078448	down
ENST00000356338	ENSG00000197535	MYO5A	transcript	0	5.10956	#NAME?	0.000238636	0.078874	down
ENST00000645576	ENSG00000075624	ACTB	transcript	0	59.4336	#NAME?	0.000241635	0.0796324	down
ENST00000395611	ENSG00000107643	MAPK8	transcript	0.0363445	1.94293	-5.74035	0.000242809	0.0797869	down
ENST00000536592	ENSG00000111348	ARHGDIB	transcript	57.0688	0	Inf	0.000250214	0.0819816	up
ENST00000439128	ENSG00000137601	NEK1	transcript	2.7718	0.0614505	5.49526	0.000252875	0.0826141	up
ENST00000564209	ENSG00000058600	POLR3E	transcript	25.7808	0	Inf	0.000256741	0.0834396	up
ENST00000338042	ENSG00000068305	MEF2A	transcript	0.864151	0	Inf	0.000259147	0.0834396	up
ENST00000647504	ENSG00000157540	DYRK1A	transcript	1.34125	32.0872	-4.58035	0.000261986	0.0838934	down
ENST00000374553	ENSG00000158813	EDA	transcript	0.585847	0	Inf	0.000265471	0.0845393	up
ENST00000074304	ENSG00000040933	INPP4A	transcript	0	0.477477	#NAME?	0.000265499	0.0845393	down
ENST00000421138	ENSG00000004700	RECQL	transcript	1.19618	0	Inf	0.000266679	0.0846764	up
ENST00000584655	ENSG00000092871	RFFL	transcript	0.76215	0	Inf	0.000269044	0.0848498	up
ENST00000519254	ENSG00000182372	CLN8	transcript	1.99304	0	Inf	0.000269237	0.0848498	up
ENST00000347077	ENSG00000187187	ZNF546	transcript	0.0018985	0.597869	-8.29883	0.000269476	0.0848498	down
ENST00000625874	ENSG00000182621	PLCB1	transcript	1.11824	0	Inf	0.000274935	0.0862404	up
ENST00000419152	ENSG00000104529	EEF1D	transcript	2.17033	0	Inf	0.000275845	0.0862404	up
ENST00000646510	ENSG00000127616	SMARCA4	transcript	0.0686915	3.22866	-5.55466	0.00027922	0.0867099	down
ENST00000638386	ENSG00000204271	SPIN3	transcript	0.86379	0	Inf	0.000284092	0.0873719	up
ENST00000496182	ENSG00000198242	RPL23A	transcript	0	86.6064	#NAME?	0.000284443	0.0873719	down
ENST00000431893	ENSG00000148396	SEC16A	transcript	7.77727	0	Inf	0.000288279	0.0883103	up
ENST00000556605	ENSG00000029364	SLC39A9	transcript	4.27013	0.0017475	11.2548	0.000290833	0.088852	up
ENST00000621835	ENSG00000167674	HDGFL2	transcript	4.90185	0.047003	6.70443	0.000292835	0.0892222	up
ENST00000617275	ENSG00000169499	PLEKHA2	transcript	8.70995	0	Inf	0.000296449	0.0900805	up
ENST00000382806	ENSG00000012817	KDM5D	transcript	10.0542	0	Inf	0.000299959	0.0906599	up
ENST00000563277	ENSG00000128989	ARPP19	transcript	0	5.16311	#NAME?	0.000309816	0.0926481	down
ENST00000314289	ENSG00000063978	RNF4	transcript	0.538242	24.895	-5.53146	0.000312405	0.0928913	down
ENST00000383229	ENSG00000182923	CEP63	transcript	1.66384	0	Inf	0.000312448	0.0928913	up
ENST00000398510	ENSG00000177200	CHD9	transcript	0	3.88707	#NAME?	0.000313094	0.0928913	down
ENST00000426016	ENSG00000115904	SOS1	transcript	4.41605	9.55e-05	15.4969	0.00031625	0.0935819	up
ENST00000394147	ENSG00000065357	DGKA	transcript	7.61449	0.221791	5.10147	0.000319402	0.0938166	up
ENST00000502499	ENSG00000015479	MATR3	transcript	16.6726	0	Inf	0.000319695	0.0938166	up
ENST00000537750	ENSG00000131018	SYNE1	transcript	0	1.21086	#NAME?	0.000322703	0.0940148	down
ENST00000587024	ENSG00000064932	SBNO2	transcript	8.86082	0	Inf	0.00033025	0.0959661	up
ENST00000311044	ENSG00000174586	ZNF497	transcript	0	0.849317	#NAME?	0.000336649	0.0969714	down
ENST00000358771	ENSG00000198053	SIRPA	transcript	0.710931	0	Inf	0.000337548	0.0969714	up
ENST00000568365	ENSG00000101307	SIRPB1	transcript	3.46193	0	Inf	0.000338242	0.0969714	up
ENST00000323716	ENSG00000170632	ARMC10	transcript	1.5968	0.0054145	8.20414	0.000338366	0.0969714	up
ENST00000539217	ENSG00000163818	LZTFL1	transcript	0	0.738628	#NAME?	0.000338857	0.0969714	down
ENST00000513878	ENSG00000120318	ARAP3	transcript	1.18236	0	Inf	0.000343299	0.0979947	up
ENST00000507807	ENSG00000049656	CLPTM1L	transcript	1.61377	0	Inf	0.000348029	0.0986196	up
ENST00000442172	ENSG00000089820	ARHGAP4	transcript	3.17406	0	Inf	0.000348106	0.0986196	up
ENST00000422127	ENSG00000154358	OBSCN	transcript	0.258168	0	Inf	0.000354027	0.0996828	up
ENST00000530165	ENSG00000254986	DPP3	transcript	6.26051	0	Inf	0.000354505	0.0996828	up
ENST00000240304	ENSG00000108848	LUC7L3	transcript	1.70332	0	Inf	0.000357778	0.100105	up
ENST00000615791	ENSG00000144161	ZC3H8	transcript	0	1.84285	#NAME?	0.000369613	0.102654	down
ENST00000336967	ENSG00000179820	MYADM	transcript	0	11.9448	#NAME?	0.00037066	0.102693	down
ENST00000326092	ENSG00000122026	RPL21	transcript	58.1398	0	Inf	0.000375942	0.103902	up
ENST00000439587	ENSG00000137103	TMEM8B	transcript	0	1.33009	#NAME?	0.000384883	0.105855	down
ENST00000600676	ENSG00000130475	FCHO1	transcript	0.870922	0	Inf	0.000387692	0.106369	up
ENST00000646625	ENSG00000165699	TSC1	transcript	0.313663	0	Inf	0.000392182	0.10734	up
ENST00000366919	ENSG00000085511	MAP3K4	transcript	3.94536	0.103828	5.2479	0.000398167	0.108715	up
ENST00000409298	ENSG00000121964	GTDC1	transcript	0	1.44959	#NAME?	0.000402068	0.109516	down
ENST00000317368	ENSG00000100280	AP1B1	transcript	8.75861	0	Inf	0.000405141	0.109918	up
ENST00000541152	ENSG00000184640	SEPT9	transcript	0.243266	71.8615	-8.20654	0.000405491	0.109918	down
ENST00000409991	ENSG00000160703	NLRX1	transcript	0.0001105	1.23442	-13.4475	0.000407416	0.110176	down
ENST00000274853	ENSG00000146112	PPP1R18	transcript	0.085563	5.54195	-6.01726	0.000409258	0.110387	down
ENST00000361544	ENSG00000079335	CDC14A	transcript	18.795	0.201019	6.54688	0.000411127	0.110387	up
ENST00000540010	ENSG00000056558	TRAF1	transcript	0.017284	1.41235	-6.35252	0.000414485	0.111025	down
ENST00000531621	ENSG00000104529	EEF1D	transcript	62.731	1.68931	5.21467	0.000426334	0.113595	up
ENST00000400721	ENSG00000141522	ARHGDIA	transcript	0	21.8366	#NAME?	0.000427272	0.113595	down
ENST00000568965	ENSG00000155666	KDM8	transcript	0	1.86858	#NAME?	0.0004281	0.113595	down
ENST00000510191	ENSG00000133706	LARS	transcript	0	9.02782	#NAME?	0.000431929	0.11381	down
ENST00000347992	ENSG00000141503	MINK1	transcript	19.7631	0.908961	4.44244	0.000433904	0.114064	up
ENST00000532405	ENSG00000140090	SLC24A4	transcript	0	0.265176	#NAME?	0.0004381	0.114634	down
ENST00000375940	ENSG00000120539	MASTL	transcript	1.22177	0	Inf	0.000439588	0.114758	up
ENST00000335753	ENSG00000065613	SLK	transcript	4.074	0	Inf	0.00044145	0.114978	up
ENST00000316594	ENSG00000126945	HNRNPH2	transcript	0.953064	23.3602	-4.61533	0.000447621	0.116318	down
ENST00000561482	ENSG00000079616	KIF22	transcript	1.12784	0	Inf	0.000449302	0.116487	up
ENST00000432422	ENSG00000065357	DGKA	transcript	7.27851	0	Inf	0.000457123	0.118094	up
ENST00000535424	ENSG00000182149	IST1	transcript	7.09624	0.0055525	10.3197	0.00045968	0.118094	up
ENST00000375241	ENSG00000081377	CDC14B	transcript	0.456881	0	Inf	0.000461055	0.118178	up
ENST00000574590	ENSG00000120071	KANSL1	transcript	1.64	0.026485	5.95238	0.000466533	0.119043	up
ENST00000454963	ENSG00000114302	PRKAR2A	transcript	1.43936	0	Inf	0.000469457	0.119279	up
ENST00000372227	ENSG00000080189	SLC35C2	transcript	5.94699	0.181805	5.0317	0.000470556	0.119279	up
ENST00000425398	ENSG00000164535	DAGLB	transcript	4.70306	0.05722	6.36094	0.000470626	0.119279	up
ENST00000393438	ENSG00000176783	RUFY1	transcript	1.02336	0	Inf	0.000478393	0.120275	up
ENST00000078527	ENSG00000060642	PIGV	transcript	1.09729	0	Inf	0.000480144	0.120343	up
ENST00000646449	ENSG00000197728	RPS26	transcript	42.2455	0	Inf	0.000486684	0.121381	up
ENST00000308588	ENSG00000169371	SNUPN	transcript	2.33369	0	Inf	0.000488172	0.121381	up
ENST00000428926	ENSG00000133943	DGLUCY	transcript	2.30032	0	Inf	0.000488581	0.121381	up
ENST00000635664	ENSG00000163539	CLASP2	transcript	0.244813	7.51193	-4.93943	0.00049038	0.12156	down
ENST00000279249	ENSG00000149798	CDC42EP2	transcript	1.30437	0	Inf	0.000495286	0.122241	up
ENST00000403425	ENSG00000140264	SERF2	transcript	6.58429	0.0360145	7.51431	0.000498706	0.12247	up
ENST00000526395	ENSG00000185187	SIGIRR	transcript	4.02817	0	Inf	0.000498883	0.12247	up
ENST00000393471	ENSG00000144182	LIPT1	transcript	0	2.18878	#NAME?	0.000499467	0.12247	down
ENST00000437989	ENSG00000186073	C15orf41	transcript	0	1.12822	#NAME?	0.000501822	0.122621	down
ENST00000610980	ENSG00000005700	IBTK	transcript	0	5.04169	#NAME?	0.000502252	0.122621	down
ENST00000600835	ENSG00000096996	IL12RB1	transcript	9.17732	0	Inf	0.000509193	0.123975	up
ENST00000349460	ENSG00000159023	EPB41	transcript	0	0.85439	#NAME?	0.00051261	0.123975	down
ENST00000216241	ENSG00000100399	CHADL	transcript	0	1.00916	#NAME?	0.000513235	0.123975	down
ENST00000431474	ENSG00000041880	PARP3	transcript	0	1.23467	#NAME?	0.000514139	0.123975	down
ENST00000351959	ENSG00000215788	TNFRSF25	transcript	18.1285	0	Inf	0.000517572	0.124479	up
ENST00000337003	ENSG00000173915	ATP5MD	transcript	0	4.58294	#NAME?	0.00051983	0.124757	down
ENST00000312037	ENSG00000164587	RPS14	transcript	36.4591	0	Inf	0.000521917	0.124792	up
ENST00000616738	ENSG00000116678	LEPR	transcript	0.536864	0	Inf	0.000522801	0.124792	up
ENST00000324052	ENSG00000174720	LARP7	transcript	0	2.496	#NAME?	0.000523288	0.124792	down
ENST00000376055	ENSG00000171552	BCL2L1	transcript	0	1.04	#NAME?	0.00052642	0.125275	down
ENST00000469796	ENSG00000068366	ACSL4	transcript	4.90245	0	Inf	0.000527863	0.125354	up
ENST00000612075	ENSG00000182621	PLCB1	transcript	0.0061235	0.861129	-7.13573	0.000529058	0.125374	down
ENST00000439673	ENSG00000103197	TSC2	transcript	4.81167	0	Inf	0.000530334	0.125414	up
ENST00000308639	ENSG00000173039	RELA	transcript	10.0879	0	Inf	0.000531553	0.12544	up
ENST00000425063	ENSG00000197343	ZNF655	transcript	5.40012	0	Inf	0.000539268	0.126995	up
ENST00000367295	ENSG00000134369	NAV1	transcript	0.225239	0	Inf	0.000541417	0.127112	up
ENST00000260585	ENSG00000138018	SELENOI	transcript	3.06968	0	Inf	0.00054201	0.127112	up
ENST00000595632	ENSG00000105393	BABAM1	transcript	3.71758	0	Inf	0.000549217	0.128152	up
ENST00000253109	ENSG00000130812	ANGPTL6	transcript	1.2954	0	Inf	0.000550447	0.128152	up
ENST00000610767	ENSG00000100379	KCTD17	transcript	1.57153	0	Inf	0.000550755	0.128152	up
ENST00000359461	ENSG00000174851	YIF1A	transcript	0	2.64434	#NAME?	0.000550983	0.128152	down
ENST00000443003	ENSG00000168028	RPSA	transcript	740.846	42.6905	4.11719	0.000555282	0.128887	up
ENST00000542973	ENSG00000089094	KDM2B	transcript	7.55577	0	Inf	0.000560447	0.129505	up
ENST00000445951	ENSG00000138286	FAM149B1	transcript	0	1.26612	#NAME?	0.000560864	0.129505	down
ENST00000427314	ENSG00000161800	RACGAP1	transcript	0.0127415	1.53964	-6.91692	0.000563906	0.129822	down
ENST00000585458	ENSG00000197563	PIGN	transcript	1.33977	0	Inf	0.000567119	0.130007	up
ENST00000529177	ENSG00000166900	STX3	transcript	1.47927	0	Inf	0.000567782	0.130007	up
ENST00000647152	ENSG00000166340	TPP1	transcript	0	6.79565	#NAME?	0.000568159	0.130007	down
ENST00000533486	ENSG00000137502	RAB30	transcript	2.50854	0	Inf	0.000573228	0.130902	up
ENST00000409683	ENSG00000187514	PTMA	transcript	25.9334	0	Inf	0.000588442	0.13359	up
ENST00000504652	ENSG00000145041	DCAF1	transcript	4.06124	0	Inf	0.00058858	0.13359	up
ENST00000258781	ENSG00000136280	CCM2	transcript	0	11.6644	#NAME?	0.000589725	0.13359	down
ENST00000427931	ENSG00000197343	ZNF655	transcript	4.5448	0	Inf	0.000597714	0.134873	up
ENST00000381250	ENSG00000006432	MAP3K9	transcript	1.59021	0	Inf	0.000601133	0.135118	up
ENST00000371060	ENSG00000116678	LEPR	transcript	0	0.490553	#NAME?	0.000602447	0.135118	down
ENST00000291775	ENSG00000160360	GPSM1	transcript	1.07817	0	Inf	0.000610516	0.135582	up
ENST00000396634	ENSG00000206503	HLA-A	transcript	196.429	0.0329145	12.543	0.000614486	0.136094	up
ENST00000579070	ENSG00000128739	SNRPN	transcript	3.58138	0	Inf	0.00061798	0.136355	up
ENST00000435900	ENSG00000241878	PISD	transcript	1.31449	0	Inf	0.000625041	0.137207	up
ENST00000328221	ENSG00000185885	IFITM1	transcript	0.013767	57.6039	-12.0307	0.00062537	0.137207	down
ENST00000528414	ENSG00000134242	PTPN22	transcript	6.16368	0	Inf	0.000630295	0.137553	up
ENST00000396340	ENSG00000111276	CDKN1B	transcript	0	2.895	#NAME?	0.000632094	0.13767	down
ENST00000457458	ENSG00000102225	CDK16	transcript	9.08998	0.377798	4.58859	0.000642031	0.138884	up
ENST00000378004	ENSG00000145819	ARHGAP26	transcript	2.35844	0	Inf	0.000642584	0.138884	up
ENST00000544249	ENSG00000147789	ZNF7	transcript	1.34452	0	Inf	0.00065077	0.139851	up
ENST00000533261	ENSG00000160593	JAML	transcript	0.125856	6.46105	-5.68193	0.000656918	0.140638	down
ENST00000558330	ENSG00000034053	APBA2	transcript	0	5.77888	#NAME?	0.000659887	0.14099	down
ENST00000263640	ENSG00000115170	ACVR1	transcript	0.172276	5.11441	-4.89177	0.000661059	0.14099	down
ENST00000361752	ENSG00000112531	QKI	transcript	0.414409	8.45098	-4.34999	0.000668829	0.141933	down
ENST00000445803	ENSG00000118260	CREB1	transcript	3.5728	0	Inf	0.000669248	0.141933	up
ENST00000613394	ENSG00000107521	HPS1	transcript	1.41567	0.013824	6.67817	0.000676732	0.142392	up
ENST00000536218	ENSG00000105486	LIG1	transcript	6.08274	0	Inf	0.00067811	0.142392	up
ENST00000381341	ENSG00000079785	DDX1	transcript	5.25052	0.012006	8.77256	0.000678324	0.142392	up
ENST00000302640	ENSG00000150995	ITPR1	transcript	2.03088	0	Inf	0.000678389	0.142392	up
ENST00000469520	ENSG00000162813	BPNT1	transcript	0.794293	0	Inf	0.000679433	0.142392	up
ENST00000336078	ENSG00000074657	ZNF532	transcript	0	0.530743	#NAME?	0.000680328	0.142392	down
ENST00000454075	ENSG00000166888	STAT6	transcript	24.0704	1.06763	4.49477	0.00068149	0.142392	up
ENST00000585930	ENSG00000184640	SEPT9	transcript	21.0471	0.090782	7.857	0.000692016	0.144015	up
ENST00000374217	ENSG00000158062	UBXN11	transcript	3.4782	0	Inf	0.000693397	0.144015	up
ENST00000554695	ENSG00000196405	EVL	transcript	16.8472	0	Inf	0.00069435	0.144015	up
ENST00000453664	ENSG00000172046	USP19	transcript	4.20436	0	Inf	0.000700793	0.144938	up
ENST00000295956	ENSG00000136068	FLNB	transcript	0	1.90528	#NAME?	0.000701364	0.144938	down
ENST00000515158	ENSG00000169045	HNRNPH1	transcript	2.57595	0	Inf	0.000709487	0.145816	up
ENST00000512797	ENSG00000145425	RPS3A	transcript	28.4594	0	Inf	0.000711962	0.146001	up
ENST00000377619	ENSG00000188243	COMMD6	transcript	30.1437	0	Inf	0.000718051	0.146511	up
ENST00000285681	ENSG00000155313	USP25	transcript	0	3.58437	#NAME?	0.000729687	0.148349	down
ENST00000487761	ENSG00000213654	GPSM3	transcript	2.24729	45.729	-4.34685	0.00073171	0.148494	down
ENST00000544434	ENSG00000081985	IL12RB2	transcript	1.00774	0	Inf	0.000734303	0.148753	up
ENST00000311066	ENSG00000116731	PRDM2	transcript	0	2.47402	#NAME?	0.000736999	0.14882	down
ENST00000340022	ENSG00000001631	KRIT1	transcript	0.787872	0.0005645	10.4468	0.000737266	0.14882	up
ENST00000299612	ENSG00000166484	MAPK7	transcript	0.90851	0	Inf	0.000740114	0.149128	up
ENST00000444836	ENSG00000116688	MFN2	transcript	6.36185	0.032708	7.60366	0.000745392	0.149658	up
ENST00000381733	ENSG00000104763	ASAH1	transcript	6.85932	0	Inf	0.000749785	0.150273	up
ENST00000618741	ENSG00000120992	LYPLA1	transcript	6.77948	0	Inf	0.000754676	0.150816	up
ENST00000326448	ENSG00000068885	IFT80	transcript	3.0748	0.018249	7.39653	0.000755584	0.150816	up
ENST00000378486	ENSG00000149527	PLCH2	transcript	0	3.72322	#NAME?	0.000756496	0.150816	down
ENST00000399150	ENSG00000204516	MICB	transcript	2.12395	0	Inf	0.000762356	0.151252	up
ENST00000449285	ENSG00000147394	ZNF185	transcript	0.0066115	0.808408	-6.93396	0.000764013	0.151252	down
ENST00000296783	ENSG00000164329	TENT2	transcript	0	5.31841	#NAME?	0.000764034	0.151252	down
ENST00000396551	ENSG00000204599	TRIM39	transcript	0.656295	0	Inf	0.00076831	0.151833	up
ENST00000409208	ENSG00000137166	FOXP4	transcript	0.694652	0	Inf	0.000774766	0.152558	up
ENST00000436473	ENSG00000147403	RPL10	transcript	85.5028	1.80878	5.56288	0.0007748	0.152558	up
ENST00000409330	ENSG00000104320	NBN	transcript	0	3.62834	#NAME?	0.000776029	0.152558	down
ENST00000535325	ENSG00000163820	FYCO1	transcript	5.53527	0.0325345	7.41054	0.000794475	0.155101	up
ENST00000382896	ENSG00000183878	UTY	transcript	2.58347	0	Inf	0.000795706	0.155101	up
ENST00000458516	ENSG00000204599	TRIM39	transcript	2.07746	0	Inf	0.000795828	0.155101	up
ENST00000487082	ENSG00000180228	PRKRA	transcript	0	1.84115	#NAME?	0.000797745	0.155207	down
ENST00000506469	ENSG00000137207	YIPF3	transcript	1.47062	0	Inf	0.000802136	0.155794	up
ENST00000324330	ENSG00000100503	NIN	transcript	30.9287	1.79022	4.11074	0.000804626	0.155846	up
ENST00000494238	ENSG00000081307	UBA5	transcript	3.20723	0.0889455	5.17226	0.000805165	0.155846	up
ENST00000522038	ENSG00000082515	MRPL22	transcript	0.854955	0	Inf	0.000810776	0.155948	up
ENST00000591779	ENSG00000068120	COASY	transcript	0	2.18873	#NAME?	0.000811443	0.155948	down
ENST00000552738	ENSG00000061987	MON2	transcript	0	2.82986	#NAME?	0.000812447	0.155948	down
ENST00000514161	ENSG00000132463	GRSF1	transcript	0	1.25163	#NAME?	0.00081259	0.155948	down
ENST00000411502	ENSG00000181045	SLC26A11	transcript	5.512	0	Inf	0.000819329	0.156975	up
ENST00000371160	ENSG00000101972	STAG2	transcript	0.102835	2.77332	-4.75321	0.000821622	0.157148	down
ENST00000564060	ENSG00000140931	CMTM3	transcript	2.54154	0	Inf	0.000833421	0.158687	up
ENST00000510993	ENSG00000145425	RPS3A	transcript	0	21.4999	#NAME?	0.00083492	0.158687	down
ENST00000457646	ENSG00000113048	MRPS27	transcript	0	5.76626	#NAME?	0.000836735	0.158687	down
ENST00000539539	ENSG00000060339	CCAR1	transcript	0	4.68748	#NAME?	0.000840984	0.158687	down
ENST00000545748	ENSG00000123358	NR4A1	transcript	1.24935	0	Inf	0.000842601	0.158687	up
ENST00000346027	ENSG00000146872	TLK2	transcript	2.73403	0	Inf	0.000845514	0.158687	up
ENST00000382004	ENSG00000080298	RFX3	transcript	0.010952	4.03888	-8.52662	0.000846818	0.158687	down
ENST00000546737	ENSG00000089060	SLC8B1	transcript	9.29852	0	Inf	0.000846912	0.158687	up
ENST00000512921	ENSG00000281028	AC104662.2	transcript	0	1.83485	#NAME?	0.000847495	0.158687	down
ENST00000607373	ENSG00000140299	BNIP2	transcript	11.1865	0.0029535	11.887	0.000848108	0.158687	up
ENST00000261415	ENSG00000113163	COL4A3BP	transcript	0.818999	0	Inf	0.000848374	0.158687	up
ENST00000621116	ENSG00000121057	AKAP1	transcript	5.40815	0.242376	4.47981	0.000849319	0.158687	up
ENST00000350690	ENSG00000183048	SLC25A10	transcript	1.3728	0	Inf	0.000853098	0.158867	up
ENST00000394091	ENSG00000138468	SENP7	transcript	0	3.32534	#NAME?	0.000855255	0.159007	down
ENST00000355640	ENSG00000101966	XIAP	transcript	4.36378	0.108677	5.32745	0.000861788	0.159696	up
ENST00000595033	ENSG00000130475	FCHO1	transcript	0	5.04896	#NAME?	0.000863304	0.159715	down
ENST00000602326	ENSG00000075151	EIF4G3	transcript	1.4994	0	Inf	0.000867225	0.159715	up
ENST00000561186	ENSG00000157450	RNF111	transcript	3.29174	0	Inf	0.000867464	0.159715	up
ENST00000517374	ENSG00000135074	ADAM19	transcript	8.08299	0	Inf	0.000867539	0.159715	up
ENST00000407381	ENSG00000054611	TBC1D22A	transcript	7.5876	0	Inf	0.000871612	0.159908	up
ENST00000489473	ENSG00000127314	RAP1B	transcript	0	28.043	#NAME?	0.000873173	0.159908	down
ENST00000420571	ENSG00000151136	BTBD11	transcript	4.51924	0	Inf	0.00087566	0.159908	up
ENST00000382447	ENSG00000172785	CBWD1	transcript	0	1.85564	#NAME?	0.000879973	0.160424	down
ENST00000524124	ENSG00000153317	ASAP1	transcript	5.83775	0.0068735	9.73015	0.000881327	0.160424	up
ENST00000641458	ENSG00000187627	RGPD1	transcript	0	2.89852	#NAME?	0.000891298	0.161718	down
ENST00000395243	ENSG00000109113	RAB34	transcript	1.52349	0	Inf	0.000894121	0.16195	up
ENST00000381496	ENSG00000151240	DIP2C	transcript	1.95802	0	Inf	0.000901353	0.162639	up
ENST00000368136	ENSG00000198945	L3MBTL3	transcript	3.36503	0	Inf	0.000905298	0.162639	up
ENST00000525688	ENSG00000026508	CD44	transcript	0	7.98162	#NAME?	0.000905445	0.162639	down
ENST00000434753	ENSG00000101966	XIAP	transcript	0.00229	4.21616	-10.8464	0.000905743	0.162639	down
ENST00000455361	ENSG00000161618	ALDH16A1	transcript	5.75146	0	Inf	0.000906443	0.162639	up
ENST00000530853	ENSG00000100503	NIN	transcript	0.94725	0.0083555	6.82488	0.000910292	0.162813	up
ENST00000622263	ENSG00000129292	PHF20L1	transcript	4.42526	0	Inf	0.000913136	0.162883	up
ENST00000359197	ENSG00000185811	IKZF1	transcript	0	3.95865	#NAME?	0.000917424	0.163056	down
ENST00000582026	ENSG00000266173	STRADA	transcript	1.75388	0	Inf	0.000923877	0.163649	up
ENST00000426905	ENSG00000006744	ELAC2	transcript	5.53437	0	Inf	0.000925102	0.163649	up
ENST00000371825	ENSG00000131725	WDR44	transcript	3.65153	0	Inf	0.000929968	0.164253	up
ENST00000420959	ENSG00000110880	CORO1C	transcript	0	1.65544	#NAME?	0.000935772	0.164771	down
ENST00000426310	ENSG00000162959	MEMO1	transcript	1.48313	0	Inf	0.000935819	0.164771	up
ENST00000589389	ENSG00000140632	GLYR1	transcript	0	4.00728	#NAME?	0.000941562	0.165524	down
ENST00000268058	ENSG00000140464	PML	transcript	1.08818	0.0073325	7.21339	0.000945377	0.165937	up
ENST00000392614	ENSG00000172794	RAB37	transcript	5.02293	0	Inf	0.000952842	0.166988	up
ENST00000645407	ENSG00000100150	DEPDC5	transcript	0.969533	0	Inf	0.00095549	0.167193	up
ENST00000430070	ENSG00000123444	KBTBD4	transcript	5.99909	0	Inf	0.000958258	0.167241	up
ENST00000563576	ENSG00000174197	MGA	transcript	0	4.01334	#NAME?	0.000958725	0.167241	down
ENST00000499879	ENSG00000101109	STK4	transcript	2.28923	0	Inf	0.000964851	0.167652	up
ENST00000356147	ENSG00000132670	PTPRA	transcript	4.26626	0	Inf	0.000965529	0.167652	up
ENST00000520781	ENSG00000104763	ASAH1	transcript	0	6.21887	#NAME?	0.000976274	0.169258	down
ENST00000257940	ENSG00000135482	ZC3H10	transcript	0	0.686298	#NAME?	0.000979272	0.169258	down
ENST00000434353	ENSG00000197620	CXorf40A	transcript	1.26139	0	Inf	0.000981157	0.169325	up
ENST00000611999	ENSG00000281887	GIMAP1-GIMAP5	transcript	6.07264	0	Inf	0.00098501	0.169599	up
ENST00000494076	ENSG00000136270	TBRG4	transcript	5.94474	0	Inf	0.000986894	0.169599	up
ENST00000377139	ENSG00000126456	IRF3	transcript	0.0162035	3.51491	-7.76104	0.000987246	0.169599	down
ENST00000349780	ENSG00000136861	CDK5RAP2	transcript	6.28779	0.01032	9.25097	0.000991854	0.170132	up
ENST00000630599	ENSG00000141867	BRD4	transcript	7.01441	0.0871085	6.33136	0.000999566	0.170936	up
ENST00000378638	ENSG00000008128	CDK11A	transcript	1.97332	0.01433	7.10544	0.00100263	0.17097	up
ENST00000417178	ENSG00000130640	TUBGCP2	transcript	3.17642	0	Inf	0.00100298	0.17097	up
ENST00000454792	ENSG00000170473	PYM1	transcript	2.97493	0	Inf	0.0010049	0.17097	up
ENST00000515665	ENSG00000168685	IL7R	transcript	0	3.51114	#NAME?	0.00100714	0.17097	down
ENST00000615084	ENSG00000132436	FIGNL1	transcript	0.02268	1.9307	-6.41156	0.00101004	0.17097	down
ENST00000395881	ENSG00000022277	RTF2	transcript	8.07877	0	Inf	0.00101038	0.17097	up
ENST00000531537	ENSG00000178685	PARP10	transcript	21.8633	0	Inf	0.00101313	0.17097	up
ENST00000422222	ENSG00000180376	CCDC66	transcript	0	6.75243	#NAME?	0.00101352	0.17097	down
ENST00000367444	ENSG00000116747	TROVE2	transcript	1.11131	0	Inf	0.00101489	0.17097	up
ENST00000545170	ENSG00000066427	ATXN3	transcript	2.85673	0.006886	8.69648	0.00101863	0.171345	up
ENST00000441627	ENSG00000122515	ZMIZ2	transcript	4.43304	0.128277	5.11096	0.00103518	0.173016	up
ENST00000487505	ENSG00000114354	TFG	transcript	2.0558	0	Inf	0.00103569	0.173016	up
ENST00000358758	ENSG00000167371	PRRT2	transcript	0	0.740861	#NAME?	0.00103621	0.173016	down
ENST00000356348	ENSG00000196911	KPNA5	transcript	0.881923	0	Inf	0.00104081	0.173016	up
ENST00000441843	ENSG00000179630	LACC1	transcript	0	0.457312	#NAME?	0.00104645	0.173443	down
ENST00000359466	ENSG00000138002	IFT172	transcript	0.878087	0	Inf	0.00104991	0.173588	up
ENST00000601668	ENSG00000032444	PNPLA6	transcript	2.51676	0	Inf	0.00105278	0.173588	up
ENST00000366920	ENSG00000085511	MAP3K4	transcript	2.24162	0	Inf	0.00105644	0.173588	up
ENST00000367582	ENSG00000112419	PHACTR2	transcript	0.539855	0	Inf	0.00105653	0.173588	up
ENST00000514888	ENSG00000128050	PAICS	transcript	3.64974	0	Inf	0.00105918	0.173605	up
ENST00000519627	ENSG00000104408	EIF3E	transcript	2.69085	0	Inf	0.00106027	0.173605	up
ENST00000293406	ENSG00000161654	LSM12	transcript	0	5.25049	#NAME?	0.00106645	0.173605	down
ENST00000443280	ENSG00000105993	DNAJB6	transcript	0	1.91737	#NAME?	0.00106885	0.173605	down
ENST00000552342	ENSG00000187109	NAP1L1	transcript	21.1773	0.164445	7.00877	0.00106892	0.173605	up
ENST00000595531	ENSG00000135966	TGFBRAP1	transcript	0.604075	0.0059815	6.65808	0.00107314	0.173976	up
ENST00000610919	ENSG00000077684	JADE1	transcript	2.24067	0	Inf	0.00107461	0.173976	up
ENST00000477382	ENSG00000168237	GLYCTK	transcript	1.62628	0	Inf	0.0010759	0.173976	up
ENST00000292314	ENSG00000160799	CCDC12	transcript	11.7643	0	Inf	0.00107737	0.173976	up
ENST00000368236	ENSG00000187862	TTC24	transcript	0	0.931441	#NAME?	0.00109819	0.176677	down
ENST00000376887	ENSG00000125257	ABCC4	transcript	0	2.12228	#NAME?	0.00109887	0.176677	down
ENST00000257198	ENSG00000134765	DSC1	transcript	0	0.442551	#NAME?	0.00109995	0.176677	down
ENST00000503238	ENSG00000075539	FRYL	transcript	1.66614	0.003367	8.95083	0.00110035	0.176677	up
ENST00000552699	ENSG00000139644	TMBIM6	transcript	1.09374	0	Inf	0.00111041	0.177789	up
ENST00000415680	ENSG00000122779	TRIM24	transcript	3.08632	0	Inf	0.00111345	0.178023	up
ENST00000395575	ENSG00000072210	ALDH3A2	transcript	0.664488	0	Inf	0.00111873	0.178415	up
ENST00000415593	ENSG00000185624	P4HB	transcript	0	7.07214	#NAME?	0.00111968	0.178415	down
ENST00000545553	ENSG00000103111	MON1B	transcript	0	1.04504	#NAME?	0.00112064	0.178415	down
ENST00000304621	ENSG00000168234	TTC39C	transcript	0.258184	17.3697	-6.07203	0.00112523	0.178686	down
ENST00000639725	ENSG00000270800	RPS10-NUDT3	transcript	2.43538	0	Inf	0.00112651	0.178686	up
ENST00000505769	ENSG00000082269	FAM135A	transcript	0	0.456327	#NAME?	0.00112708	0.178686	down
ENST00000564675	ENSG00000169371	SNUPN	transcript	1.72195	0	Inf	0.00113341	0.179187	up
ENST00000511593	ENSG00000130844	ZNF331	transcript	0	6.10189	#NAME?	0.00113939	0.179411	down
ENST00000614496	ENSG00000116062	MSH6	transcript	0	2.80497	#NAME?	0.0011427	0.179411	down
ENST00000357489	ENSG00000112200	ZNF451	transcript	2.40605	0	Inf	0.00114372	0.179411	up
ENST00000357055	ENSG00000152683	SLC30A6	transcript	2.52903	0	Inf	0.00114406	0.179411	up
ENST00000647146	ENSG00000285245	AL162417.1	transcript	1.04982	0	Inf	0.00114585	0.179411	up
ENST00000647230	ENSG00000127616	SMARCA4	transcript	0.328006	0	Inf	0.00114594	0.179411	up
ENST00000589859	ENSG00000154889	MPPE1	transcript	3.15932	0	Inf	0.00115457	0.180512	up
ENST00000355860	ENSG00000186153	WWOX	transcript	2.54878	0	Inf	0.00115829	0.180595	up
ENST00000456013	ENSG00000111679	PTPN6	transcript	35.2427	0.501273	6.13559	0.00116569	0.181498	up
ENST00000590078	ENSG00000108799	EZH1	transcript	3.26337	0	Inf	0.00116924	0.181801	up
ENST00000645119	ENSG00000122406	RPL5	transcript	18.853	0	Inf	0.00117327	0.182176	up
ENST00000382181	ENSG00000125826	RBCK1	transcript	5.13787	0	Inf	0.00118	0.182719	up
ENST00000360862	ENSG00000122390	NAA60	transcript	0.705522	0	Inf	0.00119056	0.183349	up
ENST00000614409	ENSG00000157985	AGAP1	transcript	0.246861	0	Inf	0.00119849	0.183741	up
ENST00000377748	ENSG00000171680	PLEKHG5	transcript	1.2663	0	Inf	0.00120031	0.183741	up
ENST00000394128	ENSG00000008838	MED24	transcript	0	3.23467	#NAME?	0.00120123	0.183741	down
ENST00000534510	ENSG00000164733	CTSB	transcript	23.8585	0.186334	7.00047	0.00120774	0.18414	up
ENST00000638767	ENSG00000284057	AP001273.2	transcript	3.87987	0	Inf	0.00121282	0.184515	up
ENST00000356135	ENSG00000110721	CHKA	transcript	1.19513	0	Inf	0.00121789	0.185037	up
ENST00000355272	ENSG00000065000	AP3D1	transcript	9.52796	0.0661245	7.17084	0.00122592	0.185757	up
ENST00000429360	ENSG00000128309	MPST	transcript	1.3302	0	Inf	0.00123024	0.185914	up
ENST00000372508	ENSG00000164011	ZNF691	transcript	1.10988	0	Inf	0.00124162	0.186958	up
ENST00000393310	ENSG00000169756	LIMS1	transcript	0.047533	7.1989	-7.2427	0.00124211	0.186958	down
ENST00000616760	ENSG00000213719	CLIC1	transcript	9.95846	0	Inf	0.00125062	0.187739	up
ENST00000368259	ENSG00000163468	CCT3	transcript	6.25858	0	Inf	0.00125735	0.188499	up
ENST00000361687	ENSG00000145348	TBCK	transcript	3.27177	0	Inf	0.0012686	0.189753	up
ENST00000354434	ENSG00000159840	ZYX	transcript	0	5.32213	#NAME?	0.00126907	0.189753	down
ENST00000263934	ENSG00000054523	KIF1B	transcript	1.65055	0	Inf	0.00127692	0.190674	up
ENST00000334661	ENSG00000187091	PLCD1	transcript	0.0140015	3.41418	-7.92982	0.0012848	0.191598	down
ENST00000373485	ENSG00000162521	RBBP4	transcript	1.21049	0	Inf	0.00129658	0.192592	up
ENST00000370087	ENSG00000180879	SSR4	transcript	14.2479	0	Inf	0.00130448	0.193512	up
ENST00000449570	ENSG00000114026	OGG1	transcript	3.43086	0.039668	6.43445	0.00130623	0.193517	up
ENST00000380935	ENSG00000112851	ERBIN	transcript	0	1.65995	#NAME?	0.00130983	0.193796	down
ENST00000325307	ENSG00000029993	HMGB3	transcript	0	0.492228	#NAME?	0.00132431	0.195683	down
ENST00000559047	ENSG00000248905	FMN1	transcript	0	2.49238	#NAME?	0.0013281	0.195986	down
ENST00000393287	ENSG00000066427	ATXN3	transcript	0	1.56235	#NAME?	0.00133886	0.197317	down
ENST00000369397	ENSG00000148737	TCF7L2	transcript	2.75016	0	Inf	0.00134484	0.197633	up
ENST00000555528	ENSG00000142208	AKT1	transcript	0.45668	13.445	-4.87974	0.00134798	0.197633	down
ENST00000369555	ENSG00000163349	HIPK1	transcript	0	2.64856	#NAME?	0.001348	0.197633	down
ENST00000613397	ENSG00000110330	BIRC2	transcript	2.56928	0	Inf	0.00135151	0.197891	up
ENST00000444983	ENSG00000105173	CCNE1	transcript	1.52474	5.15e-05	14.8536	0.00135449	0.198072	up
ENST00000394553	ENSG00000073417	PDE8A	transcript	2.65946	0	Inf	0.00135832	0.198355	up
ENST00000324602	ENSG00000104972	LILRB1	transcript	3.73697	0	Inf	0.00136238	0.198454	up
ENST00000392062	ENSG00000144468	RHBDD1	transcript	0.379055	0	Inf	0.0013653	0.198623	up
ENST00000397992	ENSG00000140836	ZFHX3	transcript	0.21901	0	Inf	0.00137016	0.199075	up
ENST00000545683	ENSG00000203814	HIST2H2BF	transcript	10.2679	0	Inf	0.00138422	0.200602	up
ENST00000610353	ENSG00000168421	RHOH	transcript	9.10881	0.075205	6.92029	0.00138799	0.200891	up
ENST00000379599	ENSG00000188811	NHLRC3	transcript	3.11832	0	Inf	0.00139477	0.201519	up
ENST00000559471	ENSG00000138593	SECISBP2L	transcript	0.302856	6.39734	-4.40077	0.00139732	0.201519	down
ENST00000312263	ENSG00000143164	DCAF6	transcript	3.34058	0	Inf	0.00140113	0.201759	up
ENST00000613795	ENSG00000109572	CLCN3	transcript	2.09976	0.0201795	6.70119	0.00140438	0.201786	up
ENST00000543225	ENSG00000060339	CCAR1	transcript	0	4.4174	#NAME?	0.00140489	0.201786	down
ENST00000392324	ENSG00000064490	RFXANK	transcript	1.56736	0	Inf	0.00142201	0.203462	up
ENST00000618670	ENSG00000269335	IKBKG	transcript	1.06132	0	Inf	0.00142375	0.203462	up
ENST00000553116	ENSG00000111540	RAB5B	transcript	3.14975	0	Inf	0.00143157	0.20432	up
ENST00000622860	ENSG00000104946	TBC1D17	transcript	0.022675	3.52485	-7.28032	0.00143841	0.205037	down
ENST00000542016	ENSG00000100461	RBM23	transcript	0	0.982314	#NAME?	0.00144268	0.205388	down
ENST00000432408	ENSG00000113851	CRBN	transcript	0	4.75655	#NAME?	0.0014469	0.20573	down
ENST00000615527	ENSG00000146112	PPP1R18	transcript	14.5356	0.714472	4.34656	0.00145587	0.206667	up
ENST00000377400	ENSG00000172785	CBWD1	transcript	1.47712	0.0112155	7.04115	0.0014576	0.206667	up
ENST00000357186	ENSG00000115204	MPV17	transcript	1.00881	0	Inf	0.00145898	0.206667	up
ENST00000316924	ENSG00000174996	KLC2	transcript	0.552759	0	Inf	0.00146254	0.206912	up
ENST00000341307	ENSG00000133318	RTN3	transcript	3.92962	0	Inf	0.00146515	0.207021	up
ENST00000602063	ENSG00000197619	ZNF615	transcript	0.0246405	1.3859	-5.81365	0.00146794	0.207101	down
ENST00000553897	ENSG00000100462	PRMT5	transcript	0	0.911481	#NAME?	0.00147037	0.207101	down
ENST00000401592	ENSG00000164828	SUN1	transcript	2.60927	0	Inf	0.00147121	0.207101	up
ENST00000489960	ENSG00000163870	TPRA1	transcript	5.16279	0	Inf	0.0014896	0.209244	up
ENST00000335005	ENSG00000135916	ITM2C	transcript	0	1.10785	#NAME?	0.0015046	0.210869	down
ENST00000327483	ENSG00000129993	CBFA2T3	transcript	2.41903	0	Inf	0.00150543	0.210869	up
ENST00000368060	ENSG00000112282	MED23	transcript	0	2.27876	#NAME?	0.00152715	0.212855	down
ENST00000261207	ENSG00000058272	PPP1R12A	transcript	0.086722	7.5627	-6.44636	0.00153027	0.213028	down
ENST00000262051	ENSG00000110911	SLC11A2	transcript	1.01446	0.012924	6.29452	0.00153865	0.21373	up
ENST00000442495	ENSG00000128294	TPST2	transcript	2.71586	0	Inf	0.00154286	0.21373	up
ENST00000396265	ENSG00000100300	TSPO	transcript	0	9.33219	#NAME?	0.00154463	0.21373	down
ENST00000440815	ENSG00000008517	IL32	transcript	0	1.81074	#NAME?	0.00154477	0.21373	down
ENST00000643412	ENSG00000130703	OSBPL2	transcript	2.64878	0.039554	6.06536	0.0015474	0.213832	up
ENST00000568311	ENSG00000141012	GALNS	transcript	2.67738	0	Inf	0.00155497	0.214093	up
ENST00000374189	ENSG00000107643	MAPK8	transcript	2.04311	0.084808	4.59042	0.00155955	0.214462	up
ENST00000507956	ENSG00000138744	NAAA	transcript	13.2115	0.603019	4.45345	0.00156823	0.215069	up
ENST00000382491	ENSG00000159082	SYNJ1	transcript	0	1.42471	#NAME?	0.00157038	0.215069	down
ENST00000625889	ENSG00000110921	MVK	transcript	1.01678	0	Inf	0.00157068	0.215069	up
ENST00000502323	ENSG00000132463	GRSF1	transcript	0	1.14408	#NAME?	0.00157465	0.215069	down
ENST00000407467	ENSG00000169884	WNT10B	transcript	0	0.994387	#NAME?	0.00157508	0.215069	down
ENST00000266481	ENSG00000087470	DNM1L	transcript	3.0431	0	Inf	0.00157537	0.215069	up
ENST00000300013	ENSG00000166788	SAAL1	transcript	0	1.14751	#NAME?	0.00159009	0.216817	down
ENST00000583617	ENSG00000178927	CYBC1	transcript	1.88269	0	Inf	0.00161021	0.218768	up
ENST00000412043	ENSG00000001631	KRIT1	transcript	2.74033	0	Inf	0.00162007	0.219844	up
ENST00000325686	ENSG00000179630	LACC1	transcript	0.390375	0	Inf	0.00163905	0.221621	up
ENST00000646039	ENSG00000065883	CDK13	transcript	0.0174995	4.49676	-8.00543	0.0016548	0.223085	down
ENST00000442415	ENSG00000132155	RAF1	transcript	0.05157	6.71521	-7.02476	0.00165997	0.223085	down
ENST00000422485	ENSG00000196083	IL1RAP	transcript	0	1.09597	#NAME?	0.0016606	0.223085	down
ENST00000374935	ENSG00000075151	EIF4G3	transcript	0	1.71466	#NAME?	0.00166172	0.223085	down
ENST00000519030	ENSG00000104408	EIF3E	transcript	7.18443	0	Inf	0.00166456	0.223202	up
ENST00000568733	ENSG00000013374	NUB1	transcript	0	2.8596	#NAME?	0.00167306	0.224075	down
ENST00000379370	ENSG00000188157	AGRN	transcript	1.23282	0	Inf	0.0016894	0.225493	up
ENST00000442846	ENSG00000142512	SIGLEC10	transcript	3.69852	0	Inf	0.00168963	0.225493	up
ENST00000471824	ENSG00000133256	PDE6B	transcript	2.93486	0	Inf	0.00169498	0.22594	up
ENST00000347034	ENSG00000110931	CAMKK2	transcript	0	0.360015	#NAME?	0.00170249	0.226673	down
ENST00000380454	ENSG00000124588	NQO2	transcript	1.8698	0	Inf	0.00170509	0.226753	up
ENST00000427674	ENSG00000184640	SEPT9	transcript	0.268472	53.6626	-7.643	0.00170872	0.226968	down
ENST00000440077	ENSG00000012817	KDM5D	transcript	1.98318	0	Inf	0.00171172	0.227101	up
ENST00000367580	ENSG00000153029	MR1	transcript	1.15983	0	Inf	0.00172333	0.228373	up
ENST00000454703	ENSG00000151726	ACSL1	transcript	2.45013	0	Inf	0.00172916	0.228536	up
ENST00000515169	ENSG00000159733	ZFYVE28	transcript	0.978515	0	Inf	0.00173461	0.228673	up
ENST00000368074	ENSG00000132716	DCAF8	transcript	4.45728	0.00267	10.7051	0.00173571	0.228673	up
ENST00000575576	ENSG00000131652	THOC6	transcript	6.51219	0	Inf	0.0017508	0.230111	up
ENST00000567348	ENSG00000198826	ARHGAP11A	transcript	1.81659	0.0244525	6.2151	0.00175273	0.230111	up
ENST00000261187	ENSG00000118596	SLC16A7	transcript	0.020186	2.68023	-7.05286	0.00176706	0.231722	down
ENST00000426833	ENSG00000115966	ATF2	transcript	2.12634	0	Inf	0.00177714	0.232276	up
ENST00000525793	ENSG00000162894	FCMR	transcript	0.0066115	6.1479	-9.8609	0.001778	0.232276	down
ENST00000414982	ENSG00000032444	PNPLA6	transcript	1.94039	0	Inf	0.00177898	0.232276	up
ENST00000444300	ENSG00000140543	DET1	transcript	1.61296	0	Inf	0.00178024	0.232276	up
ENST00000223528	ENSG00000106692	FKTN	transcript	1.23949	0	Inf	0.00178286	0.232276	up
ENST00000642260	ENSG00000159023	EPB41	transcript	4.99392	0.0052345	9.8979	0.00178396	0.232276	up
ENST00000508921	ENSG00000161547	SRSF2	transcript	6.29515	0	Inf	0.00178566	0.232276	up
ENST00000503128	ENSG00000109685	NSD2	transcript	1.01862	0	Inf	0.00179302	0.232965	up
ENST00000329908	ENSG00000182149	IST1	transcript	3.83705	0	Inf	0.0018115	0.234557	up
ENST00000413656	ENSG00000177000	MTHFR	transcript	0	3.85583	#NAME?	0.00182318	0.235057	down
ENST00000392413	ENSG00000130518	IQCN	transcript	2.03606	0	Inf	0.00183282	0.235543	up
ENST00000523399	ENSG00000066827	ZFAT	transcript	2.29791	0	Inf	0.0018337	0.235543	up
ENST00000407818	ENSG00000068796	KIF2A	transcript	0.0924905	6.60679	-6.1585	0.00185388	0.237865	down
ENST00000275262	ENSG00000112531	QKI	transcript	0.216601	0	Inf	0.00185887	0.238235	up
ENST00000566113	ENSG00000103502	CDIPT	transcript	5.06908	0	Inf	0.00187394	0.239618	up
ENST00000395734	ENSG00000047849	MAP4	transcript	0	1.57874	#NAME?	0.00187887	0.239618	down
ENST00000450367	ENSG00000115685	PPP1R7	transcript	2.54329	0	Inf	0.00188598	0.239618	up
ENST00000597188	ENSG00000142303	ADAMTS10	transcript	2.34256	0	Inf	0.00188848	0.239618	up
ENST00000475894	ENSG00000080845	DLGAP4	transcript	2.69974	0	Inf	0.00189375	0.239983	up
ENST00000336665	ENSG00000157985	AGAP1	transcript	0.272763	0	Inf	0.0019012	0.240389	up
ENST00000427704	ENSG00000112419	PHACTR2	transcript	9.69085	0.715726	3.75915	0.00190988	0.240931	up
ENST00000533703	ENSG00000166801	FAM111A	transcript	7.5e-06	2.41583	-18.2972	0.00191188	0.240931	down
ENST00000616406	ENSG00000108219	TSPAN14	transcript	4.35935	0.182068	4.58156	0.00191852	0.241201	up
ENST00000507531	ENSG00000163945	UVSSA	transcript	3.20676	0	Inf	0.001922	0.241201	up
ENST00000409018	ENSG00000081177	EXD2	transcript	1.21437	0.0151495	6.3248	0.00192551	0.241201	up
ENST00000472284	ENSG00000196730	DAPK1	transcript	1.44417	0	Inf	0.00192861	0.241201	up
ENST00000600682	ENSG00000125648	SLC25A23	transcript	1.20741	0	Inf	0.00192918	0.241201	up
ENST00000505239	ENSG00000109323	MANBA	transcript	3.35282	0	Inf	0.00193109	0.241201	up
ENST00000393931	ENSG00000173801	JUP	transcript	0.536987	0	Inf	0.00194039	0.241561	up
ENST00000379376	ENSG00000101265	RASSF2	transcript	3.1065	0.0119065	8.0274	0.00194974	0.242458	up
ENST00000405977	ENSG00000132640	BTBD3	transcript	0	0.357135	#NAME?	0.00195588	0.242845	down
ENST00000282185	ENSG00000152348	ATG10	transcript	0.475515	0	Inf	0.00196819	0.243948	up
ENST00000524765	ENSG00000109956	B3GAT1	transcript	0.551454	0.0071355	6.27208	0.00198511	0.245133	up
ENST00000398213	ENSG00000170473	PYM1	transcript	1.5489	0	Inf	0.00198642	0.245133	up
ENST00000564543	ENSG00000260272	AC093525.2	transcript	0.812113	0	Inf	0.0019952	0.245703	up
ENST00000342854	ENSG00000081059	TCF7	transcript	60.9781	0.256979	7.8905	0.00199539	0.245703	up
ENST00000540468	ENSG00000135624	CCT7	transcript	5.04512	0	Inf	0.00200603	0.246502	up
ENST00000413209	ENSG00000186575	NF2	transcript	4.80689	0.0099585	8.91496	0.00201195	0.246667	up
ENST00000542328	ENSG00000197150	ABCB8	transcript	0	1.93829	#NAME?	0.0020184	0.247189	down
ENST00000320246	ENSG00000119408	NEK6	transcript	2.34088	0	Inf	0.0020253	0.247499	up
ENST00000395711	ENSG00000198301	SDAD1	transcript	3.34209	0	Inf	0.00203008	0.247815	up
ENST00000643851	ENSG00000204147	ASAH2B	transcript	0.340513	0	Inf	0.00203541	0.248197	up
ENST00000626021	ENSG00000112245	PTP4A1	transcript	16.2014	0.894568	4.17878	0.0020415	0.248338	up
ENST00000422838	ENSG00000100401	RANGAP1	transcript	0	8.52894	#NAME?	0.00204351	0.248338	down
ENST00000341423	ENSG00000189403	HMGB1	transcript	0.0091105	7.47445	-9.68022	0.00204781	0.248338	down
ENST00000441580	ENSG00000160917	CPSF4	transcript	0	1.59355	#NAME?	0.00204972	0.248338	down
ENST00000588188	ENSG00000108946	PRKAR1A	transcript	6.61676	0	Inf	0.00204974	0.248338	up
ENST00000526158	ENSG00000117640	MTFR1L	transcript	0	1.79844	#NAME?	0.00206152	0.249497	down
ENST00000376094	ENSG00000108423	TUBD1	transcript	0	1.29273	#NAME?	0.00207167	0.25002	down
ENST00000545612	ENSG00000111325	OGFOD2	transcript	0.978476	0	Inf	0.00207248	0.25002	up
ENST00000614386	ENSG00000196275	GTF2IRD2	transcript	0	3.43448	#NAME?	0.00207942	0.250145	down
ENST00000359540	ENSG00000186716	BCR	transcript	0	1.69135	#NAME?	0.00208016	0.250145	down
ENST00000359660	ENSG00000145743	FBXL17	transcript	5.07349	0.0283585	7.48305	0.00209388	0.251262	up
ENST00000432436	ENSG00000242866	STRC	transcript	0.629857	0	Inf	0.00211043	0.252978	up
ENST00000642959	ENSG00000180488	MIGA1	transcript	0	1.52564	#NAME?	0.00212115	0.253725	down
ENST00000333778	ENSG00000163539	CLASP2	transcript	0.756523	0	Inf	0.00213256	0.254763	up
ENST00000615855	ENSG00000183751	TBL3	transcript	0	3.14846	#NAME?	0.00213743	0.254763	down
ENST00000392153	ENSG00000181666	HKR1	transcript	0	1.62128	#NAME?	0.00213884	0.254763	down
ENST00000561543	ENSG00000047346	FAM214A	transcript	2.62873	0	Inf	0.00214468	0.254773	up
ENST00000406606	ENSG00000160293	VAV2	transcript	1.65126	0	Inf	0.00214569	0.254773	up
ENST00000351273	ENSG00000014257	ACPP	transcript	1.45428	0	Inf	0.00215155	0.254968	up
ENST00000396777	ENSG00000132254	ARFIP2	transcript	4.14082	0	Inf	0.00215183	0.254968	up
ENST00000354906	ENSG00000154305	MIA3	transcript	0	2.65968	#NAME?	0.00215789	0.255417	down
ENST00000529106	ENSG00000133316	WDR74	transcript	5.87191	0	Inf	0.00217325	0.256701	up
ENST00000610140	ENSG00000122643	NT5C3A	transcript	3.14526	0	Inf	0.00217328	0.256701	up
ENST00000339837	ENSG00000163864	NMNAT3	transcript	0	0.790819	#NAME?	0.00217884	0.257089	down
ENST00000402131	ENSG00000140264	SERF2	transcript	2.47739	0	Inf	0.00219415	0.258301	up
ENST00000444354	ENSG00000109180	OCIAD1	transcript	0.935386	0	Inf	0.00220053	0.258301	up
ENST00000436147	ENSG00000233436	BTBD18	transcript	0	0.490592	#NAME?	0.0022107	0.258964	down
ENST00000358550	ENSG00000197555	SIPA1L1	transcript	0.35007	5.57507	-3.99328	0.00221077	0.258964	down
ENST00000532964	ENSG00000023697	DERA	transcript	0	1.83332	#NAME?	0.00221686	0.259141	down
ENST00000292199	ENSG00000160703	NLRX1	transcript	2.7523	0.0574065	5.58328	0.0022296	0.260361	up
ENST00000346833	ENSG00000108788	MLX	transcript	3.37722	0	Inf	0.00223492	0.260712	up
ENST00000423312	ENSG00000066735	KIF26A	transcript	0	0.255505	#NAME?	0.00224056	0.261101	down
ENST00000375852	ENSG00000101336	HCK	transcript	5.98676	0.0064555	9.85703	0.00225008	0.261941	up
ENST00000446103	ENSG00000163939	PBRM1	transcript	0	2.31257	#NAME?	0.00225525	0.262273	down
ENST00000545862	ENSG00000183048	SLC25A10	transcript	0.0123095	1.18846	-6.59317	0.00225935	0.26248	down
ENST00000571052	ENSG00000262246	CORO7	transcript	4.00415	0	Inf	0.00226992	0.263222	up
ENST00000304538	ENSG00000170325	PRDM10	transcript	0	1.34646	#NAME?	0.0022704	0.263222	down
ENST00000440945	ENSG00000204120	GIGYF2	transcript	0.588794	0	Inf	0.00228008	0.263617	up
ENST00000354940	ENSG00000198431	TXNRD1	transcript	0	1.82793	#NAME?	0.0022808	0.263617	down
ENST00000547838	ENSG00000198324	PHETA1	transcript	2.61046	0	Inf	0.00228876	0.263814	up
ENST00000511834	ENSG00000113761	ZNF346	transcript	2.13083	0.020682	6.6869	0.00228951	0.263814	up
ENST00000362019	ENSG00000010165	METTL13	transcript	0.460141	0	Inf	0.00229191	0.263822	up
ENST00000440706	ENSG00000106086	PLEKHA8	transcript	1.0327	0	Inf	0.00229562	0.26398	up
ENST00000451288	ENSG00000109184	DCUN1D4	transcript	1.7309	0	Inf	0.00230098	0.264025	up
ENST00000380265	ENSG00000138642	HERC6	transcript	0.0028655	3.47437	-10.2437	0.00230283	0.264025	down
ENST00000339659	ENSG00000157540	DYRK1A	transcript	24.9732	1.94434	3.68302	0.00230302	0.264025	up
ENST00000379344	ENSG00000196155	PLEKHG4	transcript	0	1.71691	#NAME?	0.00230859	0.264395	down
ENST00000400337	ENSG00000182871	COL18A1	transcript	0	1.36435	#NAME?	0.00231124	0.264431	down
ENST00000559082	ENSG00000041357	PSMA4	transcript	6.71371	0	Inf	0.00231993	0.26489	up
ENST00000434623	ENSG00000241978	AKAP2	transcript	0.006095	2.88877	-8.88861	0.00235858	0.267949	down
ENST00000401096	ENSG00000008128	CDK11A	transcript	5.36584	0.0733795	6.19228	0.00236647	0.268575	up
ENST00000368972	ENSG00000118690	ARMC2	transcript	0.022992	1.30399	-5.82566	0.00237215	0.268681	down
ENST00000522024	ENSG00000160932	LY6E	transcript	0	2.01111	#NAME?	0.00237888	0.268903	down
ENST00000439227	ENSG00000160211	G6PD	transcript	1.95223	0.0156445	6.96332	0.00238772	0.269634	up
ENST00000402228	ENSG00000154743	TSEN2	transcript	1.00646	0.000384	11.3559	0.00239866	0.270598	up
ENST00000399765	ENSG00000015475	BID	transcript	0.871567	0	Inf	0.0024187	0.272587	up
ENST00000529032	ENSG00000158636	EMSY	transcript	1.04173	0	Inf	0.00242388	0.272899	up
ENST00000531452	ENSG00000167257	RNF214	transcript	0	2.66378	#NAME?	0.00242805	0.272906	down
ENST00000454389	ENSG00000033867	SLC4A7	transcript	0.326132	0	Inf	0.00243091	0.272906	up
ENST00000617207	ENSG00000269335	IKBKG	transcript	3.65	0	Inf	0.0024336	0.272906	up
ENST00000331889	ENSG00000182973	CNOT10	transcript	0	2.77895	#NAME?	0.00243815	0.272998	down
ENST00000620854	ENSG00000111859	NEDD9	transcript	1.73842	0	Inf	0.00244219	0.272998	up
ENST00000596975	ENSG00000104870	FCGRT	transcript	1.64772	0	Inf	0.00244408	0.272998	up
ENST00000424201	ENSG00000007402	CACNA2D2	transcript	0.0065095	0.819671	-6.97636	0.00245209	0.273419	down
ENST00000443614	ENSG00000079459	FDFT1	transcript	0	5.33378	#NAME?	0.00245269	0.273419	down
ENST00000422266	ENSG00000137337	MDC1	transcript	0	2.41927	#NAME?	0.00245927	0.273883	down
ENST00000396097	ENSG00000134324	LPIN1	transcript	0	1.29844	#NAME?	0.00246373	0.273982	down
ENST00000642936	ENSG00000103197	TSC2	transcript	0.0009945	0.765819	-9.58882	0.00246501	0.273982	down
ENST00000587367	ENSG00000125743	SNRPD2	transcript	0.152474	22.2455	-7.18881	0.00247426	0.27474	down
ENST00000331677	ENSG00000111817	DSE	transcript	0.004493	0.581186	-7.01518	0.00251713	0.278952	down
ENST00000534941	ENSG00000174928	C3orf33	transcript	0.740512	0	Inf	0.00252734	0.27981	up
ENST00000294256	ENSG00000162298	SYVN1	transcript	0.492779	0	Inf	0.00255264	0.282058	up
ENST00000350437	ENSG00000013573	DDX11	transcript	1.92079	0	Inf	0.00258006	0.284257	up
ENST00000361831	ENSG00000163374	YY1AP1	transcript	2.57736	0	Inf	0.00261285	0.287307	up
ENST00000608083	ENSG00000097021	ACOT7	transcript	0.005053	1.59336	-8.30071	0.00262361	0.288209	down
ENST00000394250	ENSG00000131748	STARD3	transcript	3.46294	0	Inf	0.00263318	0.2887	up
ENST00000643847	ENSG00000148019	CEP78	transcript	0.0020205	0.774888	-8.58313	0.00264436	0.289364	down
ENST00000646979	ENSG00000179583	CIITA	transcript	1.11844	0	Inf	0.00265045	0.28975	up
ENST00000392436	ENSG00000198836	OPA1	transcript	1.86964	0	Inf	0.00266741	0.290128	up
ENST00000551043	ENSG00000111596	CNOT2	transcript	0	2.93047	#NAME?	0.0026693	0.290128	down
ENST00000512944	ENSG00000180104	EXOC3	transcript	0.094627	2.60092	-4.78063	0.0026789	0.290891	down
ENST00000273347	ENSG00000144815	NXPE3	transcript	4.35e-05	0.529946	-13.5725	0.00269807	0.292691	down
ENST00000644218	ENSG00000166340	TPP1	transcript	2.0098	0	Inf	0.00271701	0.294463	up
ENST00000620535	ENSG00000111641	NOP2	transcript	0.005751	1.39957	-7.92696	0.00272394	0.294875	down
ENST00000348208	ENSG00000119139	TJP2	transcript	1.62009	0	Inf	0.00273103	0.295134	up
ENST00000416762	ENSG00000063046	EIF4B	transcript	0.661837	0	Inf	0.00273767	0.295569	up
ENST00000354181	ENSG00000140199	SLC12A6	transcript	1.43158	0	Inf	0.00275862	0.29698	up
ENST00000357198	ENSG00000146094	DOK3	transcript	3.76111	0	Inf	0.00277266	0.298207	up
ENST00000547587	ENSG00000152556	PFKM	transcript	1.40597	0.0260015	5.75683	0.00278449	0.298814	up
ENST00000268704	ENSG00000197912	SPG7	transcript	0	2.15135	#NAME?	0.00278496	0.298814	down
ENST00000565264	ENSG00000169375	SIN3A	transcript	0	2.65691	#NAME?	0.00278623	0.298814	down
ENST00000335574	ENSG00000101294	HM13	transcript	0.80457	0	Inf	0.00279139	0.299084	up
ENST00000359422	ENSG00000105983	LMBR1	transcript	0	1.43292	#NAME?	0.00279976	0.299413	down
ENST00000521420	ENSG00000055163	CYFIP2	transcript	0.0180155	5.37253	-8.22022	0.00280366	0.299546	down
ENST00000555054	ENSG00000089737	DDX24	transcript	2.31337	0	Inf	0.00281935	0.30066	up
ENST00000400060	ENSG00000173482	PTPRM	transcript	1.33185	0	Inf	0.0028194	0.30066	up
ENST00000520166	ENSG00000171045	TSNARE1	transcript	0	3.68837	#NAME?	0.00282421	0.300889	down
ENST00000396941	ENSG00000100897	DCAF11	transcript	2.66318	0	Inf	0.0028335	0.301256	up
ENST00000423644	ENSG00000188687	SLC4A5	transcript	0	1.03606	#NAME?	0.00283521	0.301256	down
ENST00000251091	ENSG00000020577	SAMD4A	transcript	0.971496	0	Inf	0.00283565	0.301256	up
ENST00000448864	ENSG00000182899	RPL35A	transcript	2.87618	70.7835	-4.62119	0.00285016	0.302513	down
ENST00000438596	ENSG00000214021	TTLL3	transcript	2.35369	0	Inf	0.00286619	0.303644	up
ENST00000376583	ENSG00000177000	MTHFR	transcript	0.896425	0	Inf	0.00288496	0.304763	up
ENST00000503556	ENSG00000138640	FAM13A	transcript	1.85842	0	Inf	0.00288614	0.304763	up
ENST00000249375	ENSG00000128604	IRF5	transcript	2.28804	0	Inf	0.00288754	0.304763	up
ENST00000438964	ENSG00000072110	ACTN1	transcript	0	2.07601	#NAME?	0.00290096	0.305895	down
ENST00000627285	ENSG00000162065	TBC1D24	transcript	1.43198	0	Inf	0.00290377	0.305905	up
ENST00000267868	ENSG00000051180	RAD51	transcript	0.557734	0	Inf	0.00290661	0.30592	up
ENST00000532463	ENSG00000198561	CTNND1	transcript	0	1.14265	#NAME?	0.00291412	0.306265	down
ENST00000341511	ENSG00000107331	ABCA2	transcript	10.8351	0.261744	5.37141	0.00291532	0.306265	up
ENST00000525228	ENSG00000008517	IL32	transcript	0	2.59109	#NAME?	0.00292981	0.306979	down
ENST00000238341	ENSG00000119397	CNTRL	transcript	0.875869	0	Inf	0.00293026	0.306979	up
ENST00000514861	ENSG00000051596	THOC3	transcript	0.0211075	3.1096	-7.20283	0.00293635	0.307308	down
ENST00000369756	ENSG00000112773	TENT5A	transcript	0	1.17594	#NAME?	0.00293884	0.307308	down
ENST00000617346	ENSG00000265681	RPL17	transcript	7.76367	0	Inf	0.00297275	0.309602	up
ENST00000261509	ENSG00000129116	PALLD	transcript	0	0.224463	#NAME?	0.00297709	0.309602	down
ENST00000262861	ENSG00000116991	SIPA1L2	transcript	0.938516	0	Inf	0.00298117	0.309602	up
ENST00000514466	ENSG00000248592	TMEM110-MUSTN1	transcript	2.59372	0	Inf	0.00298177	0.309602	up
ENST00000381474	ENSG00000185164	NOMO2	transcript	0	1.58324	#NAME?	0.00298268	0.309602	down
ENST00000531491	ENSG00000134910	STT3A	transcript	0	0.60731	#NAME?	0.00298715	0.309782	down
ENST00000564316	ENSG00000103266	STUB1	transcript	8.40677	0	Inf	0.0029948	0.310208	up
ENST00000308008	ENSG00000158987	RAPGEF6	transcript	0	1.47724	#NAME?	0.00299676	0.310208	down
ENST00000420878	ENSG00000186814	ZSCAN30	transcript	0.720553	0.0003385	11.0557	0.00300423	0.310458	up
ENST00000537323	ENSG00000101104	PABPC1L	transcript	3.1967	0	Inf	0.00300789	0.310458	up
ENST00000577922	ENSG00000108654	DDX5	transcript	8.92999	0.0259235	8.42825	0.003009	0.310458	up
ENST00000350941	ENSG00000122507	BBS9	transcript	1.63235	0	Inf	0.003033	0.311996	up
ENST00000616019	ENSG00000278311	GGNBP2	transcript	0.359994	11.1889	-4.95795	0.0030361	0.311996	down
ENST00000440481	ENSG00000122591	FAM126A	transcript	1.76893	0.0996625	4.14968	0.00304733	0.312581	up
ENST00000354082	ENSG00000142330	CAPN10	transcript	3.16354	0	Inf	0.0030602	0.3135	up
ENST00000422154	ENSG00000123562	MORF4L2	transcript	0.00104	1.15928	-10.1224	0.00306434	0.3135	down
ENST00000627450	ENSG00000179889	PDXDC1	transcript	2.3398	0	Inf	0.003079	0.314687	up
ENST00000444152	ENSG00000198932	GPRASP1	transcript	1.03122	0	Inf	0.00310235	0.316504	up
ENST00000329478	ENSG00000213638	ADAT3	transcript	3.70446	0	Inf	0.00310238	0.316504	up
ENST00000358431	ENSG00000197077	KIAA1671	transcript	0	0.132161	#NAME?	0.00310939	0.316933	down
ENST00000369568	ENSG00000160219	GAB3	transcript	1.61357	0	Inf	0.00311334	0.317008	up
ENST00000640765	ENSG00000104447	TRPS1	transcript	0.627745	0	Inf	0.00311573	0.317008	up
ENST00000264202	ENSG00000077549	CAPZB	transcript	0.99027	46.8807	-5.56503	0.00312724	0.317604	down
ENST00000609374	ENSG00000167110	GOLGA2	transcript	3.47776	0.0875595	5.31175	0.00312904	0.317604	up
ENST00000524767	ENSG00000158636	EMSY	transcript	0.345614	0	Inf	0.00313092	0.317604	up
ENST00000381580	ENSG00000089012	SIRPG	transcript	0	1.08065	#NAME?	0.00313283	0.317604	down
ENST00000590194	ENSG00000013306	SLC25A39	transcript	7.42941	0.182132	5.35019	0.00314129	0.318177	up
ENST00000530047	ENSG00000185803	SLC52A2	transcript	3.37676	0	Inf	0.00314558	0.31827	up
ENST00000493277	ENSG00000197343	ZNF655	transcript	3.2628	0	Inf	0.00314785	0.31827	up
ENST00000622802	ENSG00000276043	UHRF1	transcript	0.573708	0	Inf	0.00315938	0.319151	up
ENST00000436027	ENSG00000250067	YJEFN3	transcript	0	1.49447	#NAME?	0.00317256	0.320196	down
ENST00000439640	ENSG00000088832	FKBP1A	transcript	3.70915	0	Inf	0.00319401	0.322063	up
ENST00000535784	ENSG00000165983	PTER	transcript	1.94815	0	Inf	0.00320482	0.322588	up
ENST00000376673	ENSG00000139793	MBNL2	transcript	1.26063	0	Inf	0.00321529	0.323354	up
ENST00000545154	ENSG00000054392	HHAT	transcript	0.36563	0	Inf	0.00323307	0.324565	up
ENST00000595533	ENSG00000167232	ZNF91	transcript	1.83339	0	Inf	0.00324923	0.325898	up
ENST00000546363	ENSG00000165821	SALL2	transcript	0.537502	0	Inf	0.00325293	0.325979	up
ENST00000396553	ENSG00000133805	AMPD3	transcript	0.739336	0.009045	6.35297	0.00326692	0.326293	up
ENST00000515192	ENSG00000143437	ARNT	transcript	9.19767	0.666251	3.78713	0.0032676	0.326293	up
ENST00000435080	ENSG00000204463	BAG6	transcript	0.0286115	4.51052	-7.30055	0.00329066	0.328305	down
ENST00000404022	ENSG00000102054	RBBP7	transcript	3.14004	0	Inf	0.00330796	0.32974	up
ENST00000332592	ENSG00000150401	DCUN1D2	transcript	0	2.28011	#NAME?	0.00331455	0.329919	down
ENST00000392249	ENSG00000082146	STRADB	transcript	0.731249	0	Inf	0.00332056	0.329919	up
ENST00000299275	ENSG00000052126	PLEKHA5	transcript	0	1.36045	#NAME?	0.00332143	0.329919	down
ENST00000351288	ENSG00000136699	SMPD4	transcript	0.108467	7.68585	-6.14687	0.00334096	0.330986	down
ENST00000370788	ENSG00000151914	DST	transcript	0	0.323252	#NAME?	0.00335134	0.331724	down
ENST00000400751	ENSG00000079616	KIF22	transcript	0	0.498605	#NAME?	0.00339401	0.334775	down
ENST00000637264	ENSG00000140521	POLG	transcript	0	1.80015	#NAME?	0.00339974	0.335048	down
ENST00000537290	ENSG00000176715	ACSF3	transcript	1.34591	0	Inf	0.00340811	0.33558	up
ENST00000530003	ENSG00000117676	RPS6KA1	transcript	3.12239	0.0031535	9.95148	0.00341864	0.336031	up
ENST00000412128	ENSG00000187514	PTMA	transcript	6.49214	0	Inf	0.00342775	0.336342	up
ENST00000586305	ENSG00000171777	RASGRP4	transcript	1.82517	0	Inf	0.00343243	0.33651	up
ENST00000601043	ENSG00000105393	BABAM1	transcript	4.23305	0	Inf	0.00345932	0.338852	up
ENST00000594234	ENSG00000099326	MZF1	transcript	0	1.34193	#NAME?	0.00347896	0.340481	down
ENST00000564965	ENSG00000121281	ADCY7	transcript	2.34774	0	Inf	0.00348845	0.340818	up
ENST00000504346	ENSG00000174227	PIGG	transcript	0	1.82675	#NAME?	0.00351465	0.342193	down
ENST00000446851	ENSG00000189308	LIN54	transcript	1.34547	0	Inf	0.00352068	0.342193	up
ENST00000284548	ENSG00000154358	OBSCN	transcript	0.899406	10.3064	-3.51843	0.00353475	0.343266	down
ENST00000416967	ENSG00000100348	TXN2	transcript	4.26868	0	Inf	0.00354069	0.343547	up
ENST00000381061	ENSG00000130638	ATXN10	transcript	0	1.82473	#NAME?	0.00355944	0.344775	down
ENST00000398422	ENSG00000135624	CCT7	transcript	4.60223	0	Inf	0.00357555	0.345384	up
ENST00000264668	ENSG00000124275	MTRR	transcript	1.05246	0.0064215	7.35664	0.00357698	0.345384	up
ENST00000402924	ENSG00000106605	BLVRA	transcript	0.166729	4.95709	-4.89392	0.00358049	0.345384	down
ENST00000417999	ENSG00000100399	CHADL	transcript	0.860171	0	Inf	0.00358666	0.345634	up
ENST00000600910	ENSG00000039650	PNKP	transcript	0	3.54807	#NAME?	0.0035954	0.346181	down
ENST00000361168	ENSG00000176444	CLK2	transcript	2.79578	0	Inf	0.0036024	0.34656	up
ENST00000446868	ENSG00000108669	CYTH1	transcript	58.6119	2.76866	4.40394	0.00360797	0.346801	up
ENST00000397389	ENSG00000111325	OGFOD2	transcript	3.7e-05	0.818392	-14.433	0.003625	0.348129	down
ENST00000643139	ENSG00000177045	SIX5	transcript	0.386879	0	Inf	0.00363103	0.348129	up
ENST00000418900	ENSG00000181061	HIGD1A	transcript	0.144244	5.9278	-5.36091	0.00365484	0.350037	down
ENST00000618728	ENSG00000118513	MYB	transcript	0	0.433175	#NAME?	0.00365712	0.350037	down
ENST00000572940	ENSG00000129219	PLD2	transcript	0	1.65159	#NAME?	0.00367201	0.350363	down
ENST00000398944	ENSG00000205609	EIF3CL	transcript	16.0282	0.185775	6.43092	0.00367268	0.350363	up
ENST00000523782	ENSG00000158856	DMTN	transcript	0	2.40526	#NAME?	0.00367292	0.350363	down
ENST00000325752	ENSG00000108423	TUBD1	transcript	2.12435	0.049369	5.42727	0.0036856	0.351276	up
ENST00000368621	ENSG00000143570	SLC39A1	transcript	2.21444	0	Inf	0.00369074	0.351279	up
ENST00000311028	ENSG00000104490	NCALD	transcript	0	1.46508	#NAME?	0.00369185	0.351279	down
ENST00000422582	ENSG00000221838	AP4M1	transcript	0.0075105	1.03378	-7.1048	0.00369814	0.351582	down
ENST00000525795	ENSG00000114779	ABHD14B	transcript	1.17308	0	Inf	0.003703	0.351748	up
ENST00000259119	ENSG00000136603	SKIL	transcript	1.72671	0	Inf	0.00371817	0.352892	up
ENST00000370613	ENSG00000155256	ZFYVE27	transcript	2.06173	0	Inf	0.00372318	0.353071	up
ENST00000230354	ENSG00000112592	TBP	transcript	2.82742	0.0996	4.8272	0.00374746	0.354227	up
ENST00000613669	ENSG00000155957	TMBIM4	transcript	6.14093	0	Inf	0.00374766	0.354227	up
ENST00000513287	ENSG00000080822	CLDND1	transcript	5.2484	0	Inf	0.0037479	0.354227	up
ENST00000358704	ENSG00000179456	ZBTB18	transcript	0.223794	8.78896	-5.29545	0.00375661	0.354662	down
ENST00000579324	ENSG00000125450	NUP85	transcript	2.71643	0	Inf	0.00375878	0.354662	up
ENST00000339438	ENSG00000009307	CSDE1	transcript	1.94738	0.086306	4.49593	0.00379405	0.357095	up
ENST00000555394	ENSG00000133961	NUMB	transcript	0	1.79357	#NAME?	0.00380557	0.357584	down
ENST00000511102	ENSG00000109180	OCIAD1	transcript	0.0879555	8.97715	-6.67334	0.00381466	0.357825	down
ENST00000631291	ENSG00000072210	ALDH3A2	transcript	0	1.36036	#NAME?	0.00381925	0.357825	down
ENST00000443006	ENSG00000146701	MDH2	transcript	2.66759	0	Inf	0.00382134	0.357825	up
ENST00000552723	ENSG00000083454	P2RX5	transcript	0	1.57989	#NAME?	0.00382487	0.357825	down
ENST00000447699	ENSG00000196305	IARS	transcript	1.23697	0	Inf	0.00382712	0.357825	up
ENST00000345957	ENSG00000104497	SNX16	transcript	0.655254	0	Inf	0.00385186	0.358796	up
ENST00000591532	ENSG00000204920	ZNF155	transcript	0	2.08617	#NAME?	0.00385338	0.358796	down
ENST00000599124	ENSG00000167483	FAM129C	transcript	2.68899	0	Inf	0.00385659	0.358799	up
ENST00000455584	ENSG00000251537	AC005324.3	transcript	0	0.235284	#NAME?	0.00388863	0.361185	down
ENST00000346348	ENSG00000135317	SNX14	transcript	0.0256395	1.07376	-5.38816	0.00389285	0.36128	down
ENST00000317233	ENSG00000144218	AFF3	transcript	0.0119545	1.2742	-6.73589	0.00390608	0.362211	down
ENST00000402010	ENSG00000072518	MARK2	transcript	0.028621	3.187	-6.79898	0.00391412	0.36266	down
ENST00000281394	ENSG00000162869	PPP1R21	transcript	0	1.69742	#NAME?	0.00393834	0.363956	down
ENST00000630662	ENSG00000072210	ALDH3A2	transcript	3.25599	0	Inf	0.00394093	0.363956	up
ENST00000504203	ENSG00000280987	MATR3	transcript	2.26396	0	Inf	0.003941	0.363956	up
ENST00000358825	ENSG00000170325	PRDM10	transcript	0.0208965	1.32577	-5.98742	0.00394775	0.363994	down
ENST00000441864	ENSG00000126453	BCL2L12	transcript	0.817813	0	Inf	0.00395107	0.363994	up
ENST00000409183	ENSG00000119844	AFTPH	transcript	0.592919	0	Inf	0.00396743	0.364588	up
ENST00000331239	ENSG00000182919	C11orf54	transcript	2.00287	0	Inf	0.00397041	0.364588	up
ENST00000545128	ENSG00000099139	PCSK5	transcript	0.932625	0.0133975	6.12126	0.00398178	0.365303	up
ENST00000374787	ENSG00000136824	SMC2	transcript	0.273257	0	Inf	0.00398467	0.365303	up
ENST00000435409	ENSG00000143624	INTS3	transcript	1.38973	0	Inf	0.00400983	0.367015	up
ENST00000374481	ENSG00000178562	CD28	transcript	0.0145525	0.830414	-5.83449	0.00401864	0.367492	down
ENST00000566718	ENSG00000174197	MGA	transcript	0.24895	9.51109	-5.25568	0.00402154	0.367492	down
ENST00000313778	ENSG00000178149	DALRD3	transcript	0	2.52651	#NAME?	0.00403941	0.36869	down
ENST00000301608	ENSG00000161533	ACOX1	transcript	0	0.607607	#NAME?	0.0040417	0.36869	down
ENST00000584164	ENSG00000161970	RPL26	transcript	106.291	6.32382	4.07108	0.00404445	0.36869	up
ENST00000520367	ENSG00000173818	ENDOV	transcript	0.421585	0	Inf	0.00405497	0.369114	up
ENST00000378634	ENSG00000172301	COPRS	transcript	1.26133	0	Inf	0.0040606	0.369269	up
ENST00000396934	ENSG00000186470	BTN3A2	transcript	1.33935	0	Inf	0.00408928	0.370685	up
ENST00000436795	ENSG00000168385	SEPT2	transcript	0	2.30197	#NAME?	0.00412134	0.372336	down
ENST00000646045	ENSG00000082074	FYB1	transcript	33.6598	1.3481	4.64203	0.004128	0.372336	up
ENST00000325134	ENSG00000251369	ZNF550	transcript	0	0.363477	#NAME?	0.00412964	0.372336	down
ENST00000422163	ENSG00000114353	GNAI2	transcript	2.03212	0	Inf	0.00413428	0.372336	up
ENST00000336727	ENSG00000159788	RGS12	transcript	0.268996	0	Inf	0.00413801	0.372336	up
ENST00000553066	ENSG00000196465	MYL6B	transcript	0.844665	0	Inf	0.004143	0.372336	up
ENST00000433615	ENSG00000143569	UBAP2L	transcript	0.624857	0	Inf	0.00415788	0.373052	up
ENST00000404138	ENSG00000184677	ZBTB40	transcript	0.057106	1.01008	-4.14469	0.0041583	0.373052	down
ENST00000434713	ENSG00000118007	STAG1	transcript	1.74181	0.000135	13.6553	0.00417946	0.373079	up
ENST00000621592	ENSG00000136997	MYC	transcript	0.216593	3.92827	-4.18083	0.00418579	0.373079	down
ENST00000453788	ENSG00000109971	HSPA8	transcript	2.40733	0	Inf	0.00418951	0.373079	up
ENST00000563273	ENSG00000169189	NSMCE1	transcript	0	2.12416	#NAME?	0.00419185	0.373079	down
ENST00000558062	ENSG00000143418	CERS2	transcript	0.056014	3.20951	-5.84042	0.00419411	0.373079	down
ENST00000367796	ENSG00000198734	F5	transcript	0.0122985	1.19081	-6.59731	0.00419429	0.373079	down
ENST00000559209	ENSG00000157450	RNF111	transcript	0.910821	0	Inf	0.00419505	0.373079	up
ENST00000533572	ENSG00000164733	CTSB	transcript	4.94306	0	Inf	0.00419508	0.373079	up
ENST00000541687	ENSG00000005436	GCFC2	transcript	0	1.12728	#NAME?	0.00419819	0.373079	down
ENST00000407022	ENSG00000168000	BSCL2	transcript	0	3.21103	#NAME?	0.0041982	0.373079	down
ENST00000347559	ENSG00000160789	LMNA	transcript	0	1.60276	#NAME?	0.00421075	0.373592	down
ENST00000483967	ENSG00000106462	EZH2	transcript	1.94471	0	Inf	0.00421499	0.373592	up
ENST00000535270	ENSG00000177084	POLE	transcript	0.739301	0	Inf	0.0042212	0.373592	up
ENST00000426837	ENSG00000047849	MAP4	transcript	0.0146005	1.51963	-6.70156	0.0042213	0.373592	down
ENST00000425647	ENSG00000136861	CDK5RAP2	transcript	1.82715	0	Inf	0.00422878	0.37374	up
ENST00000375279	ENSG00000078699	CBFA2T2	transcript	0	0.634502	#NAME?	0.00424705	0.374768	down
ENST00000535387	ENSG00000198000	NOL8	transcript	0	1.47862	#NAME?	0.00425354	0.375048	down
ENST00000549732	ENSG00000183283	DAZAP2	transcript	0	8.30381	#NAME?	0.00427308	0.375892	down
ENST00000511900	ENSG00000204628	RACK1	transcript	15.2244	0.185317	6.36025	0.00428295	0.376466	up
ENST00000589995	ENSG00000161091	MFSD12	transcript	1.43584	0	Inf	0.00429955	0.377496	up
ENST00000432900	ENSG00000189180	ZNF33A	transcript	0.0151515	2.53337	-7.38545	0.00430134	0.377496	down
ENST00000555616	ENSG00000072110	ACTN1	transcript	0	1.25778	#NAME?	0.00431962	0.378238	down
ENST00000458027	ENSG00000143554	SLC27A3	transcript	3.46586	0	Inf	0.00434422	0.379026	up
ENST00000348499	ENSG00000160221	GATD3A	transcript	3.12182	0	Inf	0.00434464	0.379026	up
ENST00000511539	ENSG00000188818	ZDHHC11	transcript	0.838414	0	Inf	0.00435157	0.379026	up
ENST00000595948	ENSG00000104951	IL4I1	transcript	0.012902	1.04482	-6.33951	0.0043523	0.379026	down
ENST00000487200	ENSG00000163539	CLASP2	transcript	0.586081	0	Inf	0.0043599	0.379093	up
ENST00000529691	ENSG00000166261	ZNF202	transcript	1.44559	0	Inf	0.00436314	0.379093	up
ENST00000429369	ENSG00000163512	AZI2	transcript	0	2.63078	#NAME?	0.00437812	0.380053	down
ENST00000533464	ENSG00000070047	PHRF1	transcript	0	0.905737	#NAME?	0.00438427	0.380053	down
ENST00000519232	ENSG00000147687	TATDN1	transcript	1.79597	0	Inf	0.00439276	0.380417	up
ENST00000438793	ENSG00000145730	PAM	transcript	0.000338	0.487652	-10.4946	0.0043952	0.380417	down
ENST00000531433	ENSG00000140090	SLC24A4	transcript	1.03073	0	Inf	0.00440313	0.380812	up
ENST00000296028	ENSG00000163736	PPBP	transcript	2.84774	39.9595	-3.81065	0.00442697	0.382289	down
ENST00000572370	ENSG00000198920	KIAA0753	transcript	0.039589	1.73392	-5.45279	0.00443677	0.382842	down
ENST00000394266	ENSG00000103037	SETD6	transcript	0	1.41812	#NAME?	0.00444327	0.383111	down
ENST00000621302	ENSG00000153094	BCL2L11	transcript	0.75156	0.0140625	5.73996	0.00446931	0.384769	up
ENST00000591608	ENSG00000105520	PLPPR2	transcript	3.12786	0.159666	4.29205	0.00448796	0.386081	up
ENST00000638708	ENSG00000266173	STRADA	transcript	0.509609	0	Inf	0.00449264	0.386174	up
ENST00000367999	ENSG00000143224	PPOX	transcript	0.392624	7.13443	-4.18358	0.00449949	0.386174	down
ENST00000378424	ENSG00000157870	FAM213B	transcript	1.65522	0	Inf	0.00450232	0.386174	up
ENST00000634654	ENSG00000169118	CSNK1G1	transcript	1.84261	0	Inf	0.00450271	0.386174	up
ENST00000453295	ENSG00000117859	OSBPL9	transcript	1.68064	0	Inf	0.00452662	0.386884	up
ENST00000432508	ENSG00000148824	MTG1	transcript	4.79973	0	Inf	0.00452925	0.386884	up
ENST00000393893	ENSG00000172725	CORO1B	transcript	0.0945105	4.96811	-5.71608	0.00453095	0.386884	down
ENST00000360802	ENSG00000137073	UBAP2	transcript	1.83411	6.05e-05	14.8878	0.00453153	0.386884	up
ENST00000593149	ENSG00000178982	EIF3K	transcript	6.24564	0	Inf	0.00455511	0.388188	up
ENST00000521780	ENSG00000120915	EPHX2	transcript	2.23778	0	Inf	0.00455861	0.388188	up
ENST00000505243	ENSG00000145425	RPS3A	transcript	0.320644	10.5444	-5.03935	0.00457047	0.388741	down
ENST00000445684	ENSG00000033867	SLC4A7	transcript	0.192339	3.20539	-4.05878	0.00459577	0.38966	down
ENST00000435176	ENSG00000076242	MLH1	transcript	1.86524	0	Inf	0.00459986	0.38966	up
ENST00000610535	ENSG00000145901	TNIP1	transcript	2.30725	0.0419995	5.77966	0.0046002	0.38966	up
ENST00000398958	ENSG00000180198	RCC1	transcript	0	1.66304	#NAME?	0.00460116	0.38966	down
ENST00000427361	ENSG00000142396	ERVK3-1	transcript	0	5.14179	#NAME?	0.00460262	0.38966	down
ENST00000409540	ENSG00000040933	INPP4A	transcript	0.616274	18.686	-4.92224	0.0046054	0.38966	down
ENST00000414200	ENSG00000112576	CCND3	transcript	2.62013	0	Inf	0.00461245	0.389964	up
ENST00000414202	ENSG00000107036	RIC1	transcript	1.416	15.6085	-3.46244	0.00461787	0.390131	down
ENST00000639835	ENSG00000266173	STRADA	transcript	0.505313	0	Inf	0.00462606	0.39053	up
ENST00000380633	ENSG00000205542	TMSB4X	transcript	9.4786	0	Inf	0.00463716	0.390884	up
ENST00000450232	ENSG00000170525	PFKFB3	transcript	1.76913	0	Inf	0.00466015	0.392392	up
ENST00000522971	ENSG00000160932	LY6E	transcript	5.44756	0	Inf	0.00466199	0.392392	up
ENST00000637657	ENSG00000175198	PCCA	transcript	1.41618	0	Inf	0.0046743	0.393135	up
ENST00000555040	ENSG00000092036	HAUS4	transcript	1.67232	0.0074245	7.81534	0.00468455	0.393705	up
ENST00000454950	ENSG00000204130	RUFY2	transcript	0	1.69611	#NAME?	0.00470275	0.394341	down
ENST00000544363	ENSG00000136280	CCM2	transcript	0	2.72827	#NAME?	0.00470279	0.394341	down
ENST00000347328	ENSG00000161813	LARP4	transcript	0	1.21969	#NAME?	0.00470452	0.394341	down
ENST00000440873	ENSG00000133895	MEN1	transcript	0.941546	0	Inf	0.00470608	0.394341	up
ENST00000449165	ENSG00000157617	C2CD2	transcript	0	1.02427	#NAME?	0.00471008	0.394384	down
ENST00000264169	ENSG00000115947	ORC4	transcript	0.02652	1.38864	-5.71044	0.00471724	0.394691	down
ENST00000395425	ENSG00000126787	DLGAP5	transcript	0.363124	0	Inf	0.00473047	0.39532	up
ENST00000415265	ENSG00000178252	WDR6	transcript	0	2.46907	#NAME?	0.00473502	0.39532	down
ENST00000552242	ENSG00000135390	ATP5MC2	transcript	0.184989	8.47754	-5.51813	0.00473526	0.39532	down
ENST00000533465	ENSG00000173442	EHBP1L1	transcript	1.29411	0	Inf	0.00474546	0.395631	up
ENST00000237163	ENSG00000083097	DOPEY1	transcript	0	0.576613	#NAME?	0.00475637	0.396205	down
ENST00000405867	ENSG00000138029	HADHB	transcript	2.766	0	Inf	0.00476307	0.396256	up
ENST00000536974	ENSG00000052126	PLEKHA5	transcript	0	0.856106	#NAME?	0.00476693	0.396256	down
ENST00000477898	ENSG00000102890	ELMO3	transcript	1.917	0	Inf	0.00477096	0.396256	up
ENST00000438021	ENSG00000154222	CC2D1B	transcript	1.73644	0	Inf	0.00477324	0.396256	up
ENST00000612123	ENSG00000185630	PBX1	transcript	0	0.216646	#NAME?	0.00477721	0.396256	down
ENST00000619416	ENSG00000100578	KIAA0586	transcript	2.38738	0.11659	4.35591	0.00477801	0.396256	up
ENST00000628140	ENSG00000171608	PIK3CD	transcript	2.51572	0.174747	3.84763	0.00479511	0.397091	up
ENST00000335281	ENSG00000186469	GNG2	transcript	0.000325	1.55161	-12.221	0.00481199	0.398198	down
ENST00000409332	ENSG00000184182	UBE2F	transcript	3.79685	0	Inf	0.00482037	0.398599	up
ENST00000472304	ENSG00000136869	TLR4	transcript	1.44619	0	Inf	0.00490467	0.404387	up
ENST00000262768	ENSG00000035862	TIMP2	transcript	4.19523	0.222763	4.23517	0.00491276	0.404612	up
ENST00000344921	ENSG00000099956	SMARCB1	transcript	2.87545	0.111659	4.68662	0.00494338	0.405524	up
ENST00000394970	ENSG00000164087	POC1A	transcript	0.517948	0	Inf	0.00494355	0.405524	up
ENST00000542564	ENSG00000187790	FANCM	transcript	0	0.689964	#NAME?	0.00494716	0.405524	down
ENST00000395124	ENSG00000134802	SLC43A3	transcript	1.62105	0	Inf	0.00495198	0.405588	up
ENST00000432455	ENSG00000196576	PLXNB2	transcript	5.68988	0.0359705	7.30544	0.00495833	0.405588	up
ENST00000420239	ENSG00000173575	CHD2	transcript	2.46206	0.046382	5.73016	0.00496828	0.405588	up
ENST00000594908	ENSG00000105223	PLD3	transcript	0.0796435	3.64075	-5.51454	0.00497085	0.405588	down
ENST00000307790	ENSG00000100325	ASCC2	transcript	0.0197875	5.26627	-8.05605	0.00497446	0.405588	down
ENST00000447726	ENSG00000167081	PBX3	transcript	0	0.441458	#NAME?	0.00498219	0.405588	down
ENST00000419386	ENSG00000197070	ARRDC1	transcript	1.22674	0	Inf	0.0049851	0.405588	up
ENST00000349505	ENSG00000100429	HDAC10	transcript	2.26343	0	Inf	0.00498525	0.405588	up
ENST00000446782	ENSG00000113838	TBCCD1	transcript	0	1.93881	#NAME?	0.00498556	0.405588	down
ENST00000531863	ENSG00000254986	DPP3	transcript	1.42217	0	Inf	0.00499463	0.405883	up
ENST00000382686	ENSG00000168488	ATXN2L	transcript	1.12123	0	Inf	0.00501917	0.406862	up
ENST00000259234	ENSG00000136715	SAP130	transcript	1.01383	0	Inf	0.0050192	0.406862	up
ENST00000502113	ENSG00000246922	UBAP1L	transcript	3.04101	0	Inf	0.00502102	0.406862	up
ENST00000431367	ENSG00000123411	IKZF4	transcript	0.835697	0	Inf	0.00502108	0.406862	up
ENST00000398160	ENSG00000100814	CCNB1IP1	transcript	0.14281	5.77489	-5.33762	0.00503082	0.407275	down
ENST00000558997	ENSG00000086666	ZFAND6	transcript	0	1.43975	#NAME?	0.00504636	0.407275	down
ENST00000634838	ENSG00000196998	WDR45	transcript	2.70604	0	Inf	0.00504827	0.407275	up
ENST00000307114	ENSG00000172432	GTPBP2	transcript	3.63965	0.0457615	6.31352	0.0050583	0.407275	up
ENST00000618462	ENSG00000178104	PDE4DIP	transcript	0.510151	0	Inf	0.00506752	0.407275	up
ENST00000358100	ENSG00000127914	AKAP9	transcript	0	0.404905	#NAME?	0.00507017	0.407275	down
ENST00000444997	ENSG00000150593	PDCD4	transcript	0	5.10912	#NAME?	0.00507017	0.407275	down
ENST00000383677	ENSG00000163607	GTPBP8	transcript	0	2.44745	#NAME?	0.00507191	0.407275	down
ENST00000551568	ENSG00000135678	CPM	transcript	0	0.220931	#NAME?	0.00508126	0.407648	down
ENST00000645104	ENSG00000073584	SMARCE1	transcript	2.56999	0.060639	5.40537	0.00508863	0.407949	up
ENST00000591919	ENSG00000167671	UBXN6	transcript	1.01307	0.00431	7.87683	0.00512996	0.410971	up
ENST00000293195	ENSG00000161513	FDXR	transcript	2.20282	0	Inf	0.00513744	0.411279	up
ENST00000427117	ENSG00000198453	ZNF568	transcript	0.560649	0	Inf	0.00515098	0.411597	up
ENST00000586443	ENSG00000030582	GRN	transcript	4.52084	0.236539	4.25644	0.00515816	0.411597	up
ENST00000400248	ENSG00000100150	DEPDC5	transcript	0.525802	0	Inf	0.00515998	0.411597	up
ENST00000584437	ENSG00000108375	RNF43	transcript	0.767404	0	Inf	0.00517026	0.411597	up
ENST00000535007	ENSG00000115694	STK25	transcript	0.410908	0	Inf	0.00517668	0.411597	up
ENST00000523768	ENSG00000083312	TNPO1	transcript	2.75269	0.0870025	4.98364	0.00517783	0.411597	up
ENST00000377901	ENSG00000165071	TMEM71	transcript	2.29509	0	Inf	0.00518484	0.411605	up
ENST00000420166	ENSG00000100281	HMGXB4	transcript	0	0.838519	#NAME?	0.00518587	0.411605	down
ENST00000447208	ENSG00000183597	TANGO2	transcript	2.04122	0	Inf	0.00518884	0.411605	up
ENST00000556513	ENSG00000092199	HNRNPC	transcript	0	3.04591	#NAME?	0.00520232	0.412384	down
ENST00000422652	ENSG00000233436	BTBD18	transcript	0.353799	0	Inf	0.00521896	0.413039	up
ENST00000252268	ENSG00000133884	DPF2	transcript	0.02499	2.84273	-6.82978	0.00522155	0.413039	down
ENST00000527546	ENSG00000133816	MICAL2	transcript	0	0.704552	#NAME?	0.00522834	0.413288	down
ENST00000642384	ENSG00000119866	BCL11A	transcript	0.258079	0	Inf	0.00524556	0.414359	up
ENST00000366496	ENSG00000162711	NLRP3	transcript	1.01172	0	Inf	0.00525133	0.414525	up
ENST00000597438	ENSG00000105700	KXD1	transcript	1.61279	0	Inf	0.00525504	0.414528	up
ENST00000396594	ENSG00000159921	GNE	transcript	0.367134	0	Inf	0.00526367	0.41492	up
ENST00000350573	ENSG00000085514	PILRA	transcript	3.977	0	Inf	0.00526946	0.415087	up
ENST00000590206	ENSG00000196365	LONP1	transcript	0	5.61947	#NAME?	0.00527902	0.41555	down
ENST00000393587	ENSG00000126903	SLC10A3	transcript	2.15518	0	Inf	0.00531677	0.418231	up
ENST00000522941	ENSG00000153310	FAM49B	transcript	0	2.45986	#NAME?	0.00534619	0.419499	down
ENST00000640601	ENSG00000243335	KCTD7	transcript	0	1.32011	#NAME?	0.00534657	0.419499	down
ENST00000380375	ENSG00000137274	BPHL	transcript	0.954857	0	Inf	0.00534774	0.419499	up
ENST00000615321	ENSG00000081019	RSBN1	transcript	11.8329	0.916719	3.69018	0.00535673	0.419913	up
ENST00000418998	ENSG00000185513	L3MBTL1	transcript	1.2365	0	Inf	0.00537165	0.420717	up
ENST00000312377	ENSG00000161800	RACGAP1	transcript	0.582648	0	Inf	0.00537444	0.420717	up
ENST00000644411	ENSG00000111913	RIPOR2	transcript	0	1.49718	#NAME?	0.00538482	0.421238	down
ENST00000373789	ENSG00000182010	RTKN2	transcript	2.00329	0.0617215	5.02046	0.0053909	0.421422	up
ENST00000522420	ENSG00000156787	TBC1D31	transcript	0	1.25793	#NAME?	0.00540913	0.422555	down
ENST00000298552	ENSG00000165699	TSC1	transcript	0.184671	0.001269	7.18512	0.0054135	0.422605	up
ENST00000443526	ENSG00000121716	PILRB	transcript	2.90122	0	Inf	0.00544128	0.423539	up
ENST00000428668	ENSG00000068308	OTUD5	transcript	5.11854	0.293134	4.1261	0.00544134	0.423539	up
ENST00000334634	ENSG00000163462	TRIM46	transcript	1.2892	0	Inf	0.0054415	0.423539	up
ENST00000587001	ENSG00000065268	WDR18	transcript	0	2.71184	#NAME?	0.00544504	0.423539	down
ENST00000340802	ENSG00000152556	PFKM	transcript	0.375772	0	Inf	0.00544795	0.423539	up
ENST00000637537	ENSG00000102805	CLN5	transcript	0.024713	1.11973	-5.50174	0.00546081	0.423747	down
ENST00000357797	ENSG00000198408	OGA	transcript	0	1.20671	#NAME?	0.00546916	0.423747	down
ENST00000528013	ENSG00000132781	MUTYH	transcript	0	2.37213	#NAME?	0.00546932	0.423747	down
ENST00000426464	ENSG00000167536	DHRS13	transcript	0	2.5065	#NAME?	0.00546937	0.423747	down
ENST00000402563	ENSG00000177150	FAM210A	transcript	0.925616	0	Inf	0.00548334	0.424394	up
ENST00000405592	ENSG00000057935	MTA3	transcript	0.0715425	2.76097	-5.27023	0.00551476	0.42572	down
ENST00000402521	ENSG00000108883	EFTUD2	transcript	0	1.28469	#NAME?	0.00551727	0.42572	down
ENST00000311912	ENSG00000101916	TLR8	transcript	1.15993	0	Inf	0.00551743	0.42572	up
ENST00000553369	ENSG00000100650	SRSF5	transcript	0.068627	16.3055	-7.89237	0.00552447	0.425972	down
ENST00000334019	ENSG00000165568	AKR1E2	transcript	0.00057	1.54128	-11.4009	0.00554658	0.426803	down
ENST00000342652	ENSG00000068383	INPP5A	transcript	1.32496	0	Inf	0.00555716	0.427327	up
ENST00000383675	ENSG00000163608	NEPRO	transcript	0	0.867093	#NAME?	0.00559947	0.429664	down
ENST00000619128	ENSG00000173692	PSMD1	transcript	0.140075	5.32868	-5.24951	0.00560861	0.429664	down
ENST00000397002	ENSG00000129535	NRL	transcript	0.0194555	1.08677	-5.80372	0.00561084	0.429664	down
ENST00000626993	ENSG00000163349	HIPK1	transcript	0.022429	1.08263	-5.59303	0.00561635	0.429664	down
ENST00000409767	ENSG00000163939	PBRM1	transcript	0	0.796177	#NAME?	0.00561794	0.429664	down
ENST00000273179	ENSG00000144677	CTDSPL	transcript	0	0.234456	#NAME?	0.00561797	0.429664	down
ENST00000380968	ENSG00000119684	MLH3	transcript	0.512864	0	Inf	0.00563869	0.430942	up
ENST00000280352	ENSG00000150776	NKAPD1	transcript	0	1.03838	#NAME?	0.0056571	0.431087	down
ENST00000548169	ENSG00000174437	ATP2A2	transcript	1.29597	0	Inf	0.0056648	0.431087	up
ENST00000481448	ENSG00000159200	RCAN1	transcript	0	0.841875	#NAME?	0.00566707	0.431087	down
ENST00000417045	ENSG00000110888	CAPRIN2	transcript	0	1.08035	#NAME?	0.0056932	0.432492	down
ENST00000620366	ENSG00000122203	KIAA1191	transcript	0	1.62344	#NAME?	0.00570531	0.432968	down
ENST00000380557	ENSG00000255529	POLR2M	transcript	0	1.09837	#NAME?	0.00570713	0.432968	down
ENST00000569433	ENSG00000141012	GALNS	transcript	0	1.40426	#NAME?	0.00572985	0.4344	down
ENST00000512738	ENSG00000109445	ZNF330	transcript	0	2.02259	#NAME?	0.00575908	0.436324	down
ENST00000413146	ENSG00000120949	TNFRSF8	transcript	1.58929	0	Inf	0.00580661	0.438755	up
ENST00000597011	ENSG00000105552	BCAT2	transcript	2.37412	0	Inf	0.0058067	0.438755	up
ENST00000354560	ENSG00000185347	TEDC1	transcript	2.52877	0	Inf	0.00581116	0.438799	up
ENST00000437340	ENSG00000214078	CPNE1	transcript	0.564872	0	Inf	0.00582005	0.439114	up
ENST00000433259	ENSG00000197586	ENTPD6	transcript	1.40438	0	Inf	0.00584128	0.439893	up
ENST00000395474	ENSG00000178252	WDR6	transcript	10.0905	0.74705	3.75565	0.00584444	0.439893	up
ENST00000395923	ENSG00000104490	NCALD	transcript	0	1.02832	#NAME?	0.0058496	0.439893	down
ENST00000619294	ENSG00000153094	BCL2L11	transcript	0.761239	0	Inf	0.00585289	0.439893	up
ENST00000465308	ENSG00000169554	ZEB2	transcript	0	1.32994	#NAME?	0.0058729	0.441033	down
ENST00000467648	ENSG00000169764	UGP2	transcript	6.48301	0.0248565	8.0269	0.00587611	0.441033	up
ENST00000585089	ENSG00000109083	IFT20	transcript	0.022051	1.88173	-6.41507	0.00589247	0.441665	down
ENST00000503859	ENSG00000071242	RPS6KA2	transcript	0.935935	0	Inf	0.00590062	0.441665	up
ENST00000643934	ENSG00000094631	HDAC6	transcript	0.975892	0	Inf	0.00590068	0.441665	up
ENST00000597036	ENSG00000008382	MPND	transcript	2.55757	0	Inf	0.00591234	0.441665	up
ENST00000541644	ENSG00000111348	ARHGDIB	transcript	4.24497	0	Inf	0.00591554	0.441665	up
ENST00000638348	ENSG00000161551	ZNF577	transcript	0	1.34534	#NAME?	0.00592311	0.441782	down
ENST00000527272	ENSG00000134909	ARHGAP32	transcript	0	0.702288	#NAME?	0.00592493	0.441782	down
ENST00000336061	ENSG00000153179	RASSF3	transcript	0	3.74411	#NAME?	0.00593925	0.441902	down
ENST00000541347	ENSG00000168329	CX3CR1	transcript	0	0.57516	#NAME?	0.00593983	0.441902	down
ENST00000439731	ENSG00000114812	VIPR1	transcript	0	1.31292	#NAME?	0.00594017	0.441902	down
ENST00000367710	ENSG00000120334	CENPL	transcript	0.575159	0	Inf	0.00594217	0.441902	up
ENST00000377017	ENSG00000102265	TIMP1	transcript	5.83968	0	Inf	0.00595237	0.442369	up
ENST00000342631	ENSG00000162804	SNED1	transcript	1.06438	0.0149515	6.15358	0.0059897	0.444851	up
ENST00000453944	ENSG00000118197	DDX59	transcript	5e-07	2.27544	-22.1177	0.0060015	0.444888	down
ENST00000247138	ENSG00000102100	SLC35A2	transcript	1.27883	0	Inf	0.00600201	0.444888	up
ENST00000589827	ENSG00000129657	SEC14L1	transcript	0	2.04582	#NAME?	0.00601249	0.444907	down
ENST00000424439	ENSG00000257108	NHLRC4	transcript	0.740658	0.0002005	11.851	0.00602269	0.444907	up
ENST00000547312	ENSG00000087470	DNM1L	transcript	1.58804	0	Inf	0.00602393	0.444907	up
ENST00000461209	ENSG00000105808	RASA4	transcript	4.82428	0.164914	4.87052	0.00603092	0.444907	up
ENST00000611216	ENSG00000089094	KDM2B	transcript	1.0595	0	Inf	0.00603368	0.444907	up
ENST00000508509	ENSG00000175471	MCTP1	transcript	1.64289	0	Inf	0.00603374	0.444907	up
ENST00000647032	ENSG00000197912	SPG7	transcript	0.397883	0	Inf	0.00604347	0.445334	up
ENST00000310336	ENSG00000172915	NBEA	transcript	0.0555695	1.93161	-5.11937	0.00605755	0.445632	down
ENST00000598088	ENSG00000063176	SPHK2	transcript	1.57993	0.0315875	5.64436	0.00606271	0.445632	up
ENST00000253811	ENSG00000131504	DIAPH1	transcript	1.91084	0.0255775	6.22319	0.00606328	0.445632	up
ENST00000317961	ENSG00000012817	KDM5D	transcript	0.0404225	16.9608	-8.71283	0.00607857	0.445667	down
ENST00000442742	ENSG00000147044	CASK	transcript	0.261236	0	Inf	0.00608138	0.445667	up
ENST00000446818	ENSG00000131374	TBC1D5	transcript	1.88548	0.0237815	6.30894	0.00608262	0.445667	up
ENST00000369496	ENSG00000163399	ATP1A1	transcript	0.353536	9.34848	-4.72481	0.00608671	0.445667	down
ENST00000302779	ENSG00000168297	PXK	transcript	1.23866	0	Inf	0.00609177	0.445667	up
ENST00000575120	ENSG00000103415	HMOX2	transcript	1.00437	0	Inf	0.00609288	0.445667	up
ENST00000436370	ENSG00000124299	PEPD	transcript	0	2.29722	#NAME?	0.00611478	0.445849	down
ENST00000252440	ENSG00000130159	ECSIT	transcript	2.50135	0	Inf	0.00611829	0.445849	up
ENST00000318100	ENSG00000258366	RTEL1	transcript	0	0.868911	#NAME?	0.00611907	0.445849	down
ENST00000349157	ENSG00000179950	PUF60	transcript	0.0708005	5.75448	-6.34478	0.00612316	0.445849	down
ENST00000549442	ENSG00000122986	HVCN1	transcript	4.28876	0	Inf	0.00619993	0.449825	up
ENST00000432089	ENSG00000102030	NAA10	transcript	1.62573	0	Inf	0.00621018	0.449859	up
ENST00000302937	ENSG00000170892	TSEN34	transcript	1.45309	0.0332065	5.45152	0.00621599	0.449859	up
ENST00000391828	ENSG00000162711	NLRP3	transcript	0	0.258161	#NAME?	0.00621632	0.449859	down
ENST00000644347	ENSG00000147044	CASK	transcript	0	0.426027	#NAME?	0.00622469	0.450177	down
ENST00000533679	ENSG00000204839	MROH6	transcript	0.528841	0	Inf	0.00625908	0.451639	up
ENST00000535282	ENSG00000133961	NUMB	transcript	0	1.15406	#NAME?	0.00628	0.452646	down
ENST00000646367	ENSG00000171456	ASXL1	transcript	3.46431	0	Inf	0.00628566	0.452646	up
ENST00000373489	ENSG00000167081	PBX3	transcript	1.33106	0	Inf	0.00628686	0.452646	up
ENST00000369567	ENSG00000134262	AP4B1	transcript	1.63837	0	Inf	0.00629344	0.45272	up
ENST00000360135	ENSG00000168781	PPIP5K1	transcript	0.175429	0	Inf	0.00629589	0.45272	up
ENST00000536334	ENSG00000136754	ABI1	transcript	0	1.04419	#NAME?	0.00630584	0.453099	down
ENST00000317734	ENSG00000080189	SLC35C2	transcript	0.000139	1.26411	-13.1507	0.00630918	0.453099	down
ENST00000559234	ENSG00000174306	ZHX3	transcript	0.0221145	0.597801	-4.7566	0.00632434	0.453611	down
ENST00000604729	ENSG00000214655	ZSWIM8	transcript	8.32752	0.51455	4.0165	0.00633696	0.454228	up
ENST00000452938	ENSG00000088766	CRLS1	transcript	0	0.909171	#NAME?	0.0063488	0.454501	down
ENST00000418034	ENSG00000177000	MTHFR	transcript	0	0.942095	#NAME?	0.00634881	0.454501	down
ENST00000399817	ENSG00000185201	IFITM2	transcript	1.04671	15.0138	-3.84235	0.00635496	0.454653	down
ENST00000395097	ENSG00000119508	NR4A3	transcript	0.959882	0	Inf	0.00636672	0.455207	up
ENST00000396475	ENSG00000105926	MPP6	transcript	2.08454	0.056964	5.19353	0.0063834	0.455249	up
ENST00000618590	ENSG00000164978	NUDT2	transcript	0	1.17642	#NAME?	0.00638861	0.455249	down
ENST00000340552	ENSG00000182541	LIMK2	transcript	1.24013	0	Inf	0.0063905	0.455249	up
ENST00000562079	ENSG00000196557	CACNA1H	transcript	1.03927	0	Inf	0.00639144	0.455249	up
ENST00000445855	ENSG00000048991	R3HDM1	transcript	0	1.45959	#NAME?	0.00640156	0.455672	down
ENST00000393304	ENSG00000172780	RAB43	transcript	0.859167	0	Inf	0.00640549	0.455672	up
ENST00000592426	ENSG00000108423	TUBD1	transcript	0.0160225	1.23854	-6.2724	0.00641014	0.455717	down
ENST00000547867	ENSG00000111596	CNOT2	transcript	0	3.59728	#NAME?	0.00642087	0.456193	down
ENST00000522208	ENSG00000113269	RNF130	transcript	0.391539	0.005506	6.15201	0.00642679	0.456326	up
ENST00000367186	ENSG00000213079	SCAF8	transcript	0.440412	12.3222	-4.80626	0.0064366	0.456489	down
ENST00000445755	ENSG00000007080	CCDC124	transcript	3.66016	0	Inf	0.00644036	0.456489	up
ENST00000589996	ENSG00000105254	TBCB	transcript	4.76529	0	Inf	0.00644282	0.456489	up
ENST00000642745	ENSG00000165699	TSC1	transcript	0.030536	2.54985	-6.38376	0.00644948	0.456489	down
ENST00000542635	ENSG00000154760	SLFN13	transcript	0	0.610753	#NAME?	0.00645356	0.456489	down
ENST00000521015	ENSG00000134014	ELP3	transcript	0	1.14909	#NAME?	0.00645556	0.456489	down
ENST00000340677	ENSG00000248333	CDK11B	transcript	0.390774	5.03026	-3.68623	0.00645801	0.456489	down
ENST00000402711	ENSG00000143924	EML4	transcript	0	0.972164	#NAME?	0.00647246	0.456986	down
ENST00000371489	ENSG00000138119	MYOF	transcript	2.25194	0	Inf	0.00649692	0.458005	up
ENST00000338010	ENSG00000161642	ZNF385A	transcript	2.55192	0.027802	6.52025	0.00650396	0.458065	up
ENST00000446747	ENSG00000147789	ZNF7	transcript	0.0562465	1.59792	-4.82829	0.00652825	0.459204	down
ENST00000372351	ENSG00000130713	EXOSC2	transcript	0	1.82836	#NAME?	0.00654545	0.460127	down
ENST00000551923	ENSG00000129317	PUS7L	transcript	0	1.02864	#NAME?	0.00658373	0.461634	down
ENST00000435065	ENSG00000197375	SLC22A5	transcript	0.009945	1.4626	-7.20035	0.00658697	0.461634	down
ENST00000579298	ENSG00000125450	NUP85	transcript	1.78503	0	Inf	0.00659415	0.461634	up
ENST00000427442	ENSG00000185513	L3MBTL1	transcript	0	1.12184	#NAME?	0.00659546	0.461634	down
ENST00000539735	ENSG00000111652	COPS7A	transcript	0	1.09812	#NAME?	0.00661136	0.462174	down
ENST00000402003	ENSG00000119801	YPEL5	transcript	0	1.60155	#NAME?	0.00667002	0.465411	down
ENST00000616972	ENSG00000168385	SEPT2	transcript	0.971676	0	Inf	0.00667885	0.465687	up
ENST00000300403	ENSG00000088325	TPX2	transcript	0.952832	0	Inf	0.00670965	0.467311	up
ENST00000375530	ENSG00000204371	EHMT2	transcript	0.901856	0	Inf	0.00672556	0.467463	up
ENST00000357003	ENSG00000144843	ADPRH	transcript	0.261688	0	Inf	0.00672593	0.467463	up
ENST00000338662	ENSG00000135390	ATP5MC2	transcript	0	1.95677	#NAME?	0.00672621	0.467463	down
ENST00000390645	ENSG00000188042	ARL4C	transcript	11.7753	107.896	-3.1958	0.00672838	0.467463	down
ENST00000403682	ENSG00000185252	ZNF74	transcript	1.19193	0	Inf	0.00675567	0.468439	up
ENST00000262929	ENSG00000101307	SIRPB1	transcript	2.00087	0	Inf	0.00675696	0.468439	up
ENST00000249270	ENSG00000105821	DNAJC2	transcript	0.502805	0	Inf	0.006759	0.468439	up
ENST00000367054	ENSG00000112096	SOD2	transcript	4.05714	0	Inf	0.00681273	0.470606	up
ENST00000635452	ENSG00000213689	TREX1	transcript	1.10927	0	Inf	0.00681893	0.470606	up
ENST00000292808	ENSG00000161204	ABCF3	transcript	1.40287	0	Inf	0.00681942	0.470606	up
ENST00000514917	ENSG00000270249	AC093668.1	transcript	2.47322	0	Inf	0.0068413	0.471828	up
ENST00000610722	ENSG00000125885	MCM8	transcript	0	0.443244	#NAME?	0.00690525	0.475202	down
ENST00000512866	ENSG00000013375	PGM3	transcript	1.69889	0	Inf	0.00693441	0.475743	up
ENST00000407684	ENSG00000157833	GAREM2	transcript	0	0.63954	#NAME?	0.00694041	0.475743	down
ENST00000619992	ENSG00000106144	CASP2	transcript	0.812446	0	Inf	0.00694228	0.475743	up
ENST00000541374	ENSG00000081985	IL12RB2	transcript	0.846561	0	Inf	0.00694253	0.475743	up
ENST00000538283	ENSG00000127314	RAP1B	transcript	0	1.60992	#NAME?	0.00694582	0.475743	down
ENST00000327575	ENSG00000185436	IFNLR1	transcript	0.668069	0	Inf	0.00694856	0.475743	up
ENST00000614887	ENSG00000267041	ZNF850	transcript	0	0.428767	#NAME?	0.00698347	0.477563	down
ENST00000344791	ENSG00000183060	LYSMD4	transcript	0	1.13551	#NAME?	0.0069836	0.477563	down
ENST00000406567	ENSG00000138073	PREB	transcript	0.089982	3.15266	-5.13079	0.00700944	0.478751	down
ENST00000346329	ENSG00000085733	CTTN	transcript	0	0.992474	#NAME?	0.00704805	0.480957	down
ENST00000327284	ENSG00000112701	SENP6	transcript	0	1.20138	#NAME?	0.00705025	0.480957	down
ENST00000397519	ENSG00000164985	PSIP1	transcript	2.01646	0	Inf	0.00711643	0.484967	up
ENST00000578130	ENSG00000169660	HEXDC	transcript	3.74809	0	Inf	0.00712307	0.484967	up
ENST00000550527	ENSG00000120868	APAF1	transcript	0.485507	0	Inf	0.00712401	0.484967	up
ENST00000418905	ENSG00000177842	ZNF620	transcript	0	0.4635	#NAME?	0.00714512	0.484967	down
ENST00000344722	ENSG00000113810	SMC4	transcript	0	0.599407	#NAME?	0.00715535	0.484967	down
ENST00000637955	ENSG00000182220	ATP6AP2	transcript	0	2.96663	#NAME?	0.00715693	0.484967	down
ENST00000409271	ENSG00000135960	EDAR	transcript	1.91001	0.042475	5.49083	0.00715839	0.484967	up
ENST00000380455	ENSG00000124588	NQO2	transcript	0.031314	0.622692	-4.31364	0.00715871	0.484967	down
ENST00000617908	ENSG00000198722	UNC13B	transcript	0	0.155851	#NAME?	0.00715977	0.484967	down
ENST00000503646	ENSG00000145779	TNFAIP8	transcript	0	1.33639	#NAME?	0.007164	0.484967	down
ENST00000265586	ENSG00000114770	ABCC5	transcript	0	0.585502	#NAME?	0.00716403	0.484967	down
ENST00000367245	ENSG00000120279	MYCT1	transcript	0	0.295694	#NAME?	0.00716619	0.484967	down
ENST00000540377	ENSG00000188735	TMEM120B	transcript	0	0.928525	#NAME?	0.00717253	0.484967	down
ENST00000476665	ENSG00000106012	IQCE	transcript	1.33005	0	Inf	0.00717878	0.484967	up
ENST00000445217	ENSG00000188227	ZNF793	transcript	0.282429	0	Inf	0.00718087	0.484967	up
ENST00000400199	ENSG00000180530	NRIP1	transcript	3.55777	0.050093	6.15022	0.00718822	0.484967	up
ENST00000419067	ENSG00000106348	IMPDH1	transcript	1.3672	0	Inf	0.00718972	0.484967	up
ENST00000414057	ENSG00000227500	SCAMP4	transcript	2.2451	0	Inf	0.00719054	0.484967	up
ENST00000465909	ENSG00000214338	SOGA3	transcript	0.240695	0	Inf	0.00720901	0.485862	up
ENST00000643875	ENSG00000165699	TSC1	transcript	0	0.504672	#NAME?	0.00722047	0.485862	down
ENST00000318876	ENSG00000165861	ZFYVE1	transcript	0	0.763741	#NAME?	0.00722056	0.485862	down
ENST00000617164	ENSG00000138376	BARD1	transcript	0.582481	0	Inf	0.00722321	0.485862	up
ENST00000580982	ENSG00000132199	ENOSF1	transcript	2.27135	0	Inf	0.0072253	0.485862	up
ENST00000375901	ENSG00000107897	ACBD5	transcript	0.857984	0	Inf	0.0072649	0.487308	up
ENST00000325464	ENSG00000175221	MED16	transcript	1.0818	0	Inf	0.00726495	0.487308	up
ENST00000448752	ENSG00000138398	PPIG	transcript	0	1.26699	#NAME?	0.00727259	0.487308	down
ENST00000356073	ENSG00000196628	TCF4	transcript	0.003303	0.249107	-6.23684	0.00727671	0.487308	down
ENST00000565497	ENSG00000102879	CORO1A	transcript	0	2.44596	#NAME?	0.00727698	0.487308	down
ENST00000395799	ENSG00000090905	TNRC6A	transcript	5.4359	0.066314	6.35706	0.00732516	0.489954	up
ENST00000503653	ENSG00000090316	MAEA	transcript	0	3.72875	#NAME?	0.00734915	0.490278	down
ENST00000407859	ENSG00000110514	MADD	transcript	0.544547	0	Inf	0.00734991	0.490278	up
ENST00000361128	ENSG00000072518	MARK2	transcript	1.04063	0	Inf	0.0073517	0.490278	up
ENST00000523266	ENSG00000158856	DMTN	transcript	1.19438	0	Inf	0.00736565	0.490919	up
ENST00000618014	ENSG00000145386	CCNA2	transcript	1.11505	0	Inf	0.00739812	0.492144	up
ENST00000377988	ENSG00000137103	TMEM8B	transcript	0.834449	0	Inf	0.00739815	0.492144	up
ENST00000375064	ENSG00000095383	TBC1D2	transcript	0	1.03107	#NAME?	0.00740337	0.492144	down
ENST00000311381	ENSG00000130349	C6orf203	transcript	0.0345375	2.13535	-5.95017	0.00741295	0.492144	down
ENST00000238855	ENSG00000119844	AFTPH	transcript	1.3334	0.075693	4.13881	0.00741886	0.492144	up
ENST00000373991	ENSG00000171222	SCAND1	transcript	5.8369	0.185308	4.9772	0.00742843	0.492201	up
ENST00000358896	ENSG00000167264	DUS2	transcript	0	1.60111	#NAME?	0.00744373	0.492752	down
ENST00000558966	ENSG00000137770	CTDSPL2	transcript	0	1.63187	#NAME?	0.00744546	0.492752	down
ENST00000337917	ENSG00000204472	AIF1	transcript	1.42546	0	Inf	0.00745408	0.492957	up
ENST00000360871	ENSG00000170325	PRDM10	transcript	3.22459	0.114184	4.81968	0.00745728	0.492957	up
ENST00000326085	ENSG00000172771	EFCAB12	transcript	0	0.423942	#NAME?	0.00746522	0.493193	down
ENST00000549701	ENSG00000087470	DNM1L	transcript	1.24321	0	Inf	0.00748544	0.49371	up
ENST00000554789	ENSG00000259431	THTPA	transcript	2.01154	0	Inf	0.00749694	0.49371	up
ENST00000610545	ENSG00000145293	ENOPH1	transcript	0.0004245	2.791	-12.6827	0.00749925	0.49371	down
ENST00000338037	ENSG00000182621	PLCB1	transcript	0	0.43552	#NAME?	0.00751272	0.49405	down
ENST00000357637	ENSG00000197563	PIGN	transcript	0.233364	0	Inf	0.00752057	0.49416	up
ENST00000520727	ENSG00000066827	ZFAT	transcript	0.0538845	2.18942	-5.34454	0.00752454	0.49416	down
ENST00000359276	ENSG00000047230	CTPS2	transcript	1.40844	0.044047	4.99891	0.00752794	0.49416	up
ENST00000342407	ENSG00000186480	INSIG1	transcript	0.792338	0	Inf	0.0075433	0.494881	up
ENST00000283474	ENSG00000153443	UBALD1	transcript	2.16967	0	Inf	0.00754797	0.4949	up
ENST00000399396	ENSG00000244754	N4BP2L2	transcript	0.131975	3.73259	-4.82183	0.00756696	0.495211	down
ENST00000393165	ENSG00000144134	RABL2A	transcript	3.29562	0.0703505	5.54985	0.00758378	0.49581	up
ENST00000435330	ENSG00000147604	RPL7	transcript	0	7.16999	#NAME?	0.00762735	0.49837	down
ENST00000270176	ENSG00000142186	SCYL1	transcript	0.0085805	0.584479	-6.08995	0.00764365	0.499147	down
ENST00000530481	ENSG00000079819	EPB41L2	transcript	0.807515	0	Inf	0.00767506	0.500039	up
ENST00000617391	ENSG00000088876	ZNF343	transcript	0.957464	0	Inf	0.00767564	0.500039	up
ENST00000404286	ENSG00000169026	SLC49A3	transcript	1.64495	0	Inf	0.00767943	0.500039	up
ENST00000506030	ENSG00000112851	ERBIN	transcript	0	0.694165	#NAME?	0.00768741	0.500271	down
ENST00000539591	ENSG00000174032	SLC25A30	transcript	0.014897	1.49106	-6.64518	0.00769655	0.500368	down
ENST00000591598	ENSG00000060069	CTDP1	transcript	0.932643	0	Inf	0.00770198	0.500368	up
ENST00000358053	ENSG00000130703	OSBPL2	transcript	0.767432	0	Inf	0.00770219	0.500368	up
ENST00000441246	ENSG00000047315	POLR2B	transcript	0.777123	0	Inf	0.00773122	0.501879	up
ENST00000342295	ENSG00000168214	RBPJ	transcript	4.91792	0.0233915	7.71592	0.00773433	0.501879	up
ENST00000456496	ENSG00000171130	ATP6V0E2	transcript	9.95545	0.410811	4.59894	0.0077499	0.501911	up
ENST00000254801	ENSG00000132465	JCHAIN	transcript	1.05438	0.00377	8.12761	0.00775258	0.501911	up
ENST00000621355	ENSG00000088826	SMOX	transcript	0	0.428557	#NAME?	0.00777014	0.501961	down
ENST00000458408	ENSG00000183401	CCDC159	transcript	2.95887	0	Inf	0.00777634	0.501961	up
ENST00000601716	ENSG00000125734	GPR108	transcript	1.30946	0	Inf	0.00777868	0.501961	up
ENST00000398896	ENSG00000172046	USP19	transcript	0.00734	1.07044	-7.18821	0.0077801	0.501961	down
ENST00000321797	ENSG00000136153	LMO7	transcript	0	0.161974	#NAME?	0.0077881	0.501961	down
ENST00000579978	ENSG00000141552	ANAPC11	transcript	5.17879	0	Inf	0.00779274	0.501961	up
ENST00000550208	ENSG00000185024	BRF1	transcript	2.85781	0	Inf	0.00779332	0.501961	up
ENST00000454612	ENSG00000204580	DDR1	transcript	0.337157	0	Inf	0.00780598	0.50249	up
ENST00000540634	ENSG00000105676	ARMC6	transcript	0.705466	0	Inf	0.00782867	0.503597	up
ENST00000397082	ENSG00000167232	ZNF91	transcript	0.186394	6.44112	-5.11088	0.0078481	0.503597	down
ENST00000377967	ENSG00000147050	KDM6A	transcript	0.540428	0	Inf	0.00784815	0.503597	up
ENST00000371242	ENSG00000101146	RAE1	transcript	1.24371	0	Inf	0.00784867	0.503597	up
ENST00000456520	ENSG00000215126	CBWD6	transcript	0	1.86356	#NAME?	0.00785599	0.503597	down
ENST00000265087	ENSG00000113739	STC2	transcript	0	0.166585	#NAME?	0.00785881	0.503597	down
ENST00000596244	ENSG00000105700	KXD1	transcript	4.44999	0.002185	10.992	0.00786802	0.50362	up
ENST00000453877	ENSG00000112182	BACH2	transcript	1.0009	0	Inf	0.00789649	0.505152	up
ENST00000236017	ENSG00000117362	APH1A	transcript	1.28102	0	Inf	0.0079032	0.505263	up
ENST00000367265	ENSG00000117139	KDM5B	transcript	0.450483	5.46191	-3.59986	0.00792262	0.505263	down
ENST00000645150	ENSG00000165699	TSC1	transcript	0.422924	0	Inf	0.00792349	0.505263	up
ENST00000637481	ENSG00000081189	MEF2C	transcript	0.481454	0	Inf	0.00792401	0.505263	up
ENST00000320370	ENSG00000138434	SSFA2	transcript	0.616571	0	Inf	0.00792505	0.505263	up
ENST00000376954	ENSG00000197779	ZNF81	transcript	0.0206935	1.51435	-6.19338	0.0079576	0.507053	down
ENST00000521599	ENSG00000104490	NCALD	transcript	0.838938	0.0149195	5.81329	0.00796237	0.50707	up
ENST00000355622	ENSG00000136869	TLR4	transcript	0.535231	0	Inf	0.00799951	0.509149	up
ENST00000585080	ENSG00000178927	CYBC1	transcript	1.12116	0	Inf	0.00800888	0.509172	up
ENST00000535601	ENSG00000102241	HTATSF1	transcript	0.022049	2.24657	-6.67087	0.00801363	0.509187	down
ENST00000438307	ENSG00000170445	HARS	transcript	1.69045	0	Inf	0.0080286	0.509655	up
ENST00000434277	ENSG00000167613	LAIR1	transcript	1.08967	0.0285915	5.25216	0.00808069	0.512483	up
ENST00000357328	ENSG00000198105	ZNF248	transcript	0.604991	0	Inf	0.00808816	0.512483	up
ENST00000379160	ENSG00000132646	PCNA	transcript	2.1195	0	Inf	0.00809269	0.512483	up
ENST00000263398	ENSG00000026508	CD44	transcript	29.27	3.3841	3.11258	0.00812003	0.51368	up
ENST00000354266	ENSG00000126858	RHOT1	transcript	1.02693	0	Inf	0.00812222	0.51368	up
ENST00000618481	ENSG00000099968	BCL2L13	transcript	0	0.58547	#NAME?	0.00812524	0.51368	down
ENST00000409064	ENSG00000115548	KDM3A	transcript	0.00859	0.768269	-6.48281	0.00814359	0.514265	down
ENST00000520276	ENSG00000104447	TRPS1	transcript	0.702613	0	Inf	0.00816816	0.515529	up
ENST00000560599	ENSG00000147421	HMBOX1	transcript	0	0.837761	#NAME?	0.00822463	0.517828	down
ENST00000372157	ENSG00000108219	TSPAN14	transcript	40.3951	4.06515	3.3128	0.00822749	0.517828	up
ENST00000599319	ENSG00000105700	KXD1	transcript	0	1.25106	#NAME?	0.00823263	0.517863	down
ENST00000344387	ENSG00000186448	ZNF197	transcript	0	0.87673	#NAME?	0.00825444	0.518658	down
ENST00000615631	ENSG00000079459	FDFT1	transcript	1.14922	0	Inf	0.00834085	0.522657	up
ENST00000614941	ENSG00000275066	SYNRG	transcript	0.831704	0	Inf	0.00834096	0.522657	up
ENST00000528062	ENSG00000131051	RBM39	transcript	1.17078	0	Inf	0.0083412	0.522657	up
ENST00000477925	ENSG00000135250	SRPK2	transcript	0	2.22156	#NAME?	0.00838571	0.524849	down
ENST00000555215	ENSG00000092199	HNRNPC	transcript	0	3.6288	#NAME?	0.00839919	0.524849	down
ENST00000625458	ENSG00000130349	C6orf203	transcript	0.0857905	2.1523	-4.64892	0.00841177	0.524888	down
ENST00000311626	ENSG00000120093	HOXB3	transcript	0.319396	0	Inf	0.00841395	0.524888	up
ENST00000636815	ENSG00000104763	ASAH1	transcript	0.0314445	1.88865	-5.9084	0.00845764	0.525854	down
ENST00000551264	ENSG00000139116	KIF21A	transcript	0.885822	0	Inf	0.00846851	0.525854	up
ENST00000396663	ENSG00000122644	ARL4A	transcript	0.869768	0	Inf	0.00847097	0.525854	up
ENST00000630497	ENSG00000133247	KMT5C	transcript	1.43682	0	Inf	0.00847114	0.525854	up
ENST00000531755	ENSG00000170322	NFRKB	transcript	0.954492	0	Inf	0.00847121	0.525854	up
ENST00000375200	ENSG00000131061	ZNF341	transcript	0.815099	0	Inf	0.00847131	0.525854	up
ENST00000503794	ENSG00000113552	GNPDA1	transcript	2.16558	0.000348	12.6034	0.00848601	0.526336	up
ENST00000411594	ENSG00000112983	BRD8	transcript	2.38667	0.049674	5.58637	0.00851471	0.527287	up
ENST00000458276	ENSG00000011198	ABHD5	transcript	0	0.932156	#NAME?	0.00851772	0.527287	down
ENST00000510217	ENSG00000113068	PFDN1	transcript	2.66087	0	Inf	0.00854896	0.527827	up
ENST00000293879	ENSG00000161996	WDR90	transcript	0.526137	0	Inf	0.00854907	0.527827	up
ENST00000428702	ENSG00000151552	QDPR	transcript	2.16403	0	Inf	0.00855445	0.527827	up
ENST00000599857	ENSG00000062822	POLD1	transcript	0.045844	2.72183	-5.8917	0.00856089	0.527936	down
ENST00000391875	ENSG00000143748	NVL	transcript	0	0.985026	#NAME?	0.00858721	0.528706	down
ENST00000368890	ENSG00000143398	PIP5K1A	transcript	0	0.768922	#NAME?	0.00858741	0.528706	down
ENST00000538581	ENSG00000145020	AMT	transcript	0.027452	2.00068	-6.18743	0.00861546	0.528788	down
ENST00000577908	ENSG00000010244	ZNF207	transcript	0.589296	0	Inf	0.00862135	0.528788	up
ENST00000610588	ENSG00000101901	ALG13	transcript	0.661192	0	Inf	0.00862149	0.528788	up
ENST00000356309	ENSG00000146918	NCAPG2	transcript	1.3098	0.0048305	8.08296	0.00863067	0.529064	up
ENST00000409136	ENSG00000138434	SSFA2	transcript	1.81285	0.032929	5.78276	0.00864323	0.529546	up
ENST00000372428	ENSG00000147224	PRPS1	transcript	0	1.65909	#NAME?	0.00864861	0.529589	down
ENST00000598312	ENSG00000181894	ZNF329	transcript	0.482619	0	Inf	0.00866926	0.530566	up
ENST00000531089	ENSG00000164733	CTSB	transcript	2.1725	0.0478655	5.50423	0.0087143	0.532746	up
ENST00000596288	ENSG00000112118	MCM3	transcript	4.6628	0.408768	3.51184	0.00873526	0.533507	up
ENST00000458310	ENSG00000175449	RFESD	transcript	0	0.308224	#NAME?	0.00875522	0.533938	down
ENST00000428693	ENSG00000182670	TTC3	transcript	0	0.858348	#NAME?	0.00875742	0.533938	down
ENST00000282891	ENSG00000152942	RAD17	transcript	1.27399	0	Inf	0.00876674	0.534218	up
ENST00000531110	ENSG00000026508	CD44	transcript	0.0909455	3.66405	-5.33229	0.0087887	0.535268	down
ENST00000625664	ENSG00000138592	USP8	transcript	0	1.81165	#NAME?	0.00880093	0.535724	down
ENST00000347401	ENSG00000163359	COL6A3	transcript	0	0.315626	#NAME?	0.0088262	0.536277	down
ENST00000432931	ENSG00000134453	RBM17	transcript	3.51924	0	Inf	0.00882953	0.536277	up
ENST00000415862	ENSG00000244687	UBE2V1	transcript	1.186	0	Inf	0.00883012	0.536277	up
ENST00000296302	ENSG00000163939	PBRM1	transcript	0.384044	6.00251	-3.96622	0.00883118	0.536277	down
ENST00000397377	ENSG00000100802	C14orf93	transcript	1.52083	0	Inf	0.00883374	0.536277	up
ENST00000375832	ENSG00000204424	LY6G6F	transcript	0	0.899088	#NAME?	0.00885197	0.537095	down
ENST00000451196	ENSG00000007923	DNAJC11	transcript	2.06538	0	Inf	0.00889925	0.537616	up
ENST00000393157	ENSG00000160271	RALGDS	transcript	4.93045	0.451161	3.45001	0.0088994	0.537616	up
ENST00000359683	ENSG00000196290	NIF3L1	transcript	0	1.65592	#NAME?	0.0089007	0.537616	down
ENST00000337433	ENSG00000167380	ZNF226	transcript	0	1.10032	#NAME?	0.00894129	0.538774	down
ENST00000336614	ENSG00000249471	ZNF324B	transcript	0	0.941524	#NAME?	0.00894135	0.538774	down
ENST00000378543	ENSG00000162585	FAAP20	transcript	0	4.9544	#NAME?	0.00894232	0.538774	down
ENST00000539277	ENSG00000133687	TMTC1	transcript	0.969709	0	Inf	0.00894636	0.538774	up
ENST00000453408	ENSG00000141503	MINK1	transcript	13.2738	1.46673	3.17791	0.00895302	0.538888	up
ENST00000562373	ENSG00000123358	NR4A1	transcript	1.13716	0	Inf	0.00896814	0.539511	up
ENST00000368002	ENSG00000143258	USP21	transcript	2.42542	0.007857	8.27004	0.00897904	0.5398	up
ENST00000353841	ENSG00000164896	FASTK	transcript	1.99197	0	Inf	0.0089825	0.5398	up
ENST00000577894	ENSG00000185862	EVI2B	transcript	1.84109	0.028026	6.03765	0.00899079	0.540011	up
ENST00000394762	ENSG00000148660	CAMK2G	transcript	0.029619	2.00414	-6.08031	0.00901115	0.540947	down
ENST00000395309	ENSG00000126777	KTN1	transcript	0	0.691838	#NAME?	0.00904347	0.542598	down
ENST00000590769	ENSG00000118900	UBN1	transcript	0	0.75253	#NAME?	0.00905653	0.543094	down
ENST00000532982	ENSG00000110042	DTX4	transcript	0	0.489065	#NAME?	0.00909084	0.544862	down
ENST00000616316	ENSG00000185201	IFITM2	transcript	14.5	1.05968	3.77435	0.00910666	0.54549	up
ENST00000373734	ENSG00000149636	DSN1	transcript	0	1.44362	#NAME?	0.00912761	0.545908	down
ENST00000559488	ENSG00000259207	ITGB3	transcript	0.866232	8.84058	-3.35132	0.00916106	0.547041	down
ENST00000238856	ENSG00000119844	AFTPH	transcript	1.39574	13.1556	-3.23657	0.00920296	0.548262	down
ENST00000290418	ENSG00000135637	CCDC142	transcript	0.920525	0	Inf	0.00921081	0.548262	up
ENST00000373608	ENSG00000144524	COPS7B	transcript	1.02567	0	Inf	0.00921928	0.548262	up
ENST00000538290	ENSG00000117090	SLAMF1	transcript	0.126511	6.49051	-5.681	0.00924193	0.548262	down
ENST00000560829	ENSG00000028528	SNX1	transcript	0	0.530547	#NAME?	0.00924264	0.548262	down
ENST00000531281	ENSG00000104529	EEF1D	transcript	3.35942	0	Inf	0.00924695	0.548262	up
ENST00000396212	ENSG00000103540	CCP110	transcript	1.66371	0.130922	3.66762	0.00925038	0.548262	up
ENST00000377321	ENSG00000133895	MEN1	transcript	1.64569	0.0539385	4.93124	0.0092544	0.548262	up
ENST00000619044	ENSG00000285447	ZNF883	transcript	0	0.428439	#NAME?	0.00925582	0.548262	down
ENST00000356083	ENSG00000196739	COL27A1	transcript	0.036445	1.08939	-4.90166	0.00925911	0.548262	down
ENST00000371848	ENSG00000131725	WDR44	transcript	0.0175925	1.70605	-6.59955	0.00926635	0.548403	down
ENST00000307972	ENSG00000137166	FOXP4	transcript	0.253412	0	Inf	0.0093041	0.550349	up
ENST00000424117	ENSG00000114933	INO80D	transcript	0	0.492115	#NAME?	0.00932749	0.550871	down
ENST00000346752	ENSG00000132530	XAF1	transcript	0.489484	0	Inf	0.00933612	0.550871	up
ENST00000376156	ENSG00000159063	ALG8	transcript	0.0124215	1.36037	-6.77501	0.00934617	0.550871	down
ENST00000430095	ENSG00000002016	RAD52	transcript	1.14552	0	Inf	0.00934865	0.550871	up
ENST00000439822	ENSG00000115762	PLEKHB2	transcript	0.617235	0	Inf	0.00935516	0.550871	up
ENST00000420848	ENSG00000172661	WASHC2C	transcript	2.97843	0	Inf	0.00935679	0.550871	up
ENST00000374724	ENSG00000070214	SLC44A1	transcript	0	0.838296	#NAME?	0.00936891	0.551017	down
ENST00000481503	ENSG00000091732	ZC3HC1	transcript	0	1.49153	#NAME?	0.00936902	0.551017	down
ENST00000452555	ENSG00000102100	SLC35A2	transcript	0.512163	0	Inf	0.00939815	0.551778	up
ENST00000249923	ENSG00000129083	COPB1	transcript	8.69256	0.662334	3.71415	0.00940148	0.551778	up
ENST00000644159	ENSG00000109323	MANBA	transcript	0.0762985	3.31441	-5.44095	0.00941209	0.552114	down
ENST00000541639	ENSG00000012817	KDM5D	transcript	4.41784	0.0452205	6.61022	0.00942233	0.552428	up
ENST00000498469	ENSG00000157800	SLC37A3	transcript	0.0215535	1.47963	-6.10117	0.00947279	0.554487	down
ENST00000466448	ENSG00000116350	SRSF4	transcript	0.625964	0	Inf	0.00947707	0.554487	up
ENST00000355572	ENSG00000196923	PDLIM7	transcript	0.90964	0	Inf	0.00948699	0.554528	up
ENST00000599543	ENSG00000039650	PNKP	transcript	0.016543	2.32958	-7.13771	0.00949459	0.554528	down
ENST00000409493	ENSG00000115274	INO80B	transcript	1.4303	0	Inf	0.00950458	0.554528	up
ENST00000415526	ENSG00000148337	CIZ1	transcript	3.64897	0.082051	5.47482	0.00950509	0.554528	up
ENST00000448593	ENSG00000131351	HAUS8	transcript	1.72961	0	Inf	0.00951168	0.554528	up
ENST00000402280	ENSG00000091106	NLRC4	transcript	0.757403	0	Inf	0.00952781	0.554803	up
ENST00000431183	ENSG00000136699	SMPD4	transcript	0.626284	0.022509	4.79824	0.0095289	0.554803	up
ENST00000447398	ENSG00000105953	OGDH	transcript	0.05469	2.87767	-5.71748	0.00957734	0.556246	down
ENST00000517766	ENSG00000196776	CD47	transcript	4.89471	0	Inf	0.00957833	0.556246	up
ENST00000368882	ENSG00000123505	AMD1	transcript	0.823944	0	Inf	0.00962429	0.557664	up
ENST00000278568	ENSG00000149269	PAK1	transcript	0.99403	0	Inf	0.00962581	0.557664	up
ENST00000625464	ENSG00000156531	PHF6	transcript	0.639757	0.0009285	9.42841	0.00963113	0.557664	up
ENST00000309052	ENSG00000172954	LCLAT1	transcript	2.73977	0.0210715	7.02262	0.00964501	0.557664	up
ENST00000358246	ENSG00000166927	MS4A7	transcript	6.42703	0.146113	5.459	0.0096504	0.557664	up
ENST00000422435	ENSG00000116852	KIF21B	transcript	0	0.460166	#NAME?	0.00966692	0.557664	down
ENST00000399082	ENSG00000179344	HLA-DQB1	transcript	0	2.0854	#NAME?	0.00966766	0.557664	down
ENST00000614468	ENSG00000135838	NPL	transcript	0	0.33697	#NAME?	0.00966887	0.557664	down
ENST00000644331	ENSG00000100150	DEPDC5	transcript	0.486518	0	Inf	0.00968288	0.557906	up
ENST00000419755	ENSG00000256349	AP002748.4	transcript	0.737448	0	Inf	0.00968358	0.557906	up
ENST00000621469	ENSG00000114738	MAPKAPK3	transcript	1.39267	13.6513	-3.29311	0.00969681	0.558384	down
ENST00000559060	ENSG00000140044	JDP2	transcript	1.69284	0	Inf	0.0097089	0.558751	up
ENST00000427047	ENSG00000188566	NDOR1	transcript	0.413098	0	Inf	0.00972595	0.558775	up
ENST00000302558	ENSG00000169629	RGPD8	transcript	1.71126	15.7681	-3.20387	0.00973734	0.559009	down
ENST00000610600	ENSG00000277149	TYW1B	transcript	0	0.759615	#NAME?	0.00980085	0.56237	down
ENST00000377819	ENSG00000133318	RTN3	transcript	0.0204615	0.516218	-4.657	0.00985592	0.564592	down
ENST00000393360	ENSG00000050748	MAPK9	transcript	0	0.57756	#NAME?	0.00985955	0.564592	down
ENST00000373657	ENSG00000186871	ERCC6L	transcript	0	0.248925	#NAME?	0.00989214	0.565301	down
ENST00000612033	ENSG00000076944	STXBP2	transcript	8.12157	0.268921	4.91651	0.00990682	0.565301	up
ENST00000442664	ENSG00000132305	IMMT	transcript	0.112902	6.95416	-5.94474	0.00991493	0.565471	down
ENST00000571874	ENSG00000141552	ANAPC11	transcript	0	4.06427	#NAME?	0.00992508	0.565764	down
ENST00000301093	ENSG00000167562	ZNF701	transcript	0.988521	0	Inf	0.00994938	0.566028	up
ENST00000584685	ENSG00000109118	PHF12	transcript	3.9847	0	Inf	0.00994949	0.566028	up
ENST00000446735	ENSG00000167085	PHB	transcript	3.52342	0	Inf	0.00994956	0.566028	up
ENST00000245620	ENSG00000204577	LILRB3	transcript	1.18281	0	Inf	0.00997815	0.566227	up
ENST00000620646	ENSG00000123728	RAP2C	transcript	0.316096	3.557	-3.49223	0.00997819	0.566227	down
ENST00000429040	ENSG00000143570	SLC39A1	transcript	2.13609	0	Inf	0.00997821	0.566227	up
ENST00000375779	ENSG00000213719	CLIC1	transcript	0	2.2866	#NAME?	0.0100307	0.56863	down
ENST00000378685	ENSG00000128596	CCDC136	transcript	0.496033	0	Inf	0.0100575	0.56863	up
ENST00000446860	ENSG00000068745	IP6K2	transcript	1.54574	0	Inf	0.0100608	0.56863	up
ENST00000352303	ENSG00000185627	PSMD13	transcript	1.78567	0	Inf	0.0100647	0.56863	up
ENST00000438356	ENSG00000184863	RBM33	transcript	4.68888	0	Inf	0.0100657	0.56863	up
ENST00000415690	ENSG00000113580	NR3C1	transcript	0	0.674724	#NAME?	0.0100822	0.568738	down
ENST00000421016	ENSG00000187607	ZNF286A	transcript	0	0.164103	#NAME?	0.0100825	0.568738	down
ENST00000642322	ENSG00000215301	DDX3X	transcript	0	0.574174	#NAME?	0.0101185	0.570176	down
ENST00000356810	ENSG00000258366	RTEL1	transcript	1.80195	0.051513	5.12848	0.0101281	0.570436	up
ENST00000640600	ENSG00000117620	SLC35A3	transcript	0.721097	0	Inf	0.0101531	0.571554	up
ENST00000553726	ENSG00000027075	PRKCH	transcript	4.66195	0	Inf	0.0101598	0.571588	up
ENST00000242210	ENSG00000122643	NT5C3A	transcript	0.0401345	1.4805	-5.20509	0.0101779	0.571588	down
ENST00000536071	ENSG00000177981	ASB8	transcript	2.06215	5e-07	21.9757	0.0101815	0.571588	up
ENST00000396061	ENSG00000140307	GTF2A2	transcript	0.149587	3.77857	-4.65878	0.0101823	0.571588	down
ENST00000357857	ENSG00000188603	CLN3	transcript	0	1.47122	#NAME?	0.010184	0.571588	down
ENST00000369908	ENSG00000198276	UCKL1	transcript	5.02333	0.298301	4.0738	0.010193	0.571809	up
ENST00000394432	ENSG00000068831	RASGRP2	transcript	7.75949	0.274817	4.81942	0.0102133	0.572662	up
ENST00000505330	ENSG00000017260	ATP2C1	transcript	0	0.496278	#NAME?	0.0102257	0.572802	down
ENST00000440274	ENSG00000023228	NDUFS1	transcript	0	1.01442	#NAME?	0.0102259	0.572802	down
ENST00000298684	ENSG00000165795	NDRG2	transcript	1.4059	0	Inf	0.0102329	0.572851	up
ENST00000505095	ENSG00000170088	TMEM192	transcript	1.72329	0.0512795	5.07064	0.0102369	0.572851	up
ENST00000646166	ENSG00000167522	ANKRD11	transcript	1.53341	0	Inf	0.0102709	0.574119	up
ENST00000422240	ENSG00000143801	PSEN2	transcript	1.22645	0	Inf	0.0102812	0.574119	up
ENST00000349511	ENSG00000144744	UBA3	transcript	1.12581	0	Inf	0.0102813	0.574119	up
ENST00000345865	ENSG00000125351	UPF3B	transcript	1.02181	0	Inf	0.0102826	0.574119	up
ENST00000571035	ENSG00000108798	ABI3	transcript	0.986021	0	Inf	0.010292	0.574119	up
ENST00000520359	ENSG00000104728	ARHGEF10	transcript	0.456676	0	Inf	0.0102991	0.574119	up
ENST00000316356	ENSG00000137501	SYTL2	transcript	0.0043025	0.273531	-5.99039	0.0103064	0.574119	down
ENST00000366669	ENSG00000135775	COG2	transcript	0.834917	9.50554	-3.50906	0.0103557	0.57585	down
ENST00000360708	ENSG00000091732	ZC3HC1	transcript	1.41102	0	Inf	0.010368	0.57585	up
ENST00000359783	ENSG00000196704	AMZ2	transcript	1.37652	0	Inf	0.0103686	0.57585	up
ENST00000404621	ENSG00000196498	NCOR2	transcript	11.6759	0.751011	3.95855	0.0103705	0.57585	up
ENST00000358301	ENSG00000130669	PAK4	transcript	0.862939	0	Inf	0.0103713	0.57585	up
ENST00000380067	ENSG00000125434	SLC25A35	transcript	1.57885	0.0041805	8.56098	0.0103838	0.576222	up
ENST00000443941	ENSG00000119004	CYP20A1	transcript	3.08147	0	Inf	0.0104059	0.576459	up
ENST00000393687	ENSG00000184216	IRAK1	transcript	8.84159	0.764722	3.5313	0.0104132	0.576459	up
ENST00000436190	ENSG00000166974	MAPRE2	transcript	4.8296	0.033029	7.19203	0.0104162	0.576459	up
ENST00000590173	ENSG00000205744	DENND1C	transcript	1.27223	0	Inf	0.0104247	0.576459	up
ENST00000587387	ENSG00000030582	GRN	transcript	3.0768	0.0275555	6.80295	0.0104376	0.576459	up
ENST00000366497	ENSG00000162711	NLRP3	transcript	0.385379	0	Inf	0.0104427	0.576459	up
ENST00000380591	ENSG00000145741	BTF3	transcript	16.9687	1.63801	3.37286	0.0104469	0.576459	up
ENST00000221315	ENSG00000256087	ZNF432	transcript	0	1.76753	#NAME?	0.0104493	0.576459	down
ENST00000378637	ENSG00000182621	PLCB1	transcript	0.0728125	1.45478	-4.32047	0.010484	0.577019	down
ENST00000544052	ENSG00000092108	SCFD1	transcript	1.13766	0	Inf	0.0105157	0.578056	up
ENST00000529067	ENSG00000028277	POU2F2	transcript	0.878269	0	Inf	0.0105159	0.578056	up
ENST00000490631	ENSG00000082996	RNF13	transcript	4.21673	0	Inf	0.0105191	0.578056	up
ENST00000282903	ENSG00000152952	PLOD2	transcript	0	0.22111	#NAME?	0.0106057	0.581634	down
ENST00000397707	ENSG00000140199	SLC12A6	transcript	0	0.58639	#NAME?	0.0106099	0.581634	down
ENST00000431666	ENSG00000125505	MBOAT7	transcript	2.03833	0.004653	8.77501	0.0106107	0.581634	up
ENST00000265229	ENSG00000082515	MRPL22	transcript	0	0.810416	#NAME?	0.010611	0.581634	down
ENST00000612421	ENSG00000124570	SERPINB6	transcript	0	1.55765	#NAME?	0.0106113	0.581634	down
ENST00000397852	ENSG00000160255	ITGB2	transcript	30.9193	0.720576	5.42321	0.0106534	0.582996	up
ENST00000392011	ENSG00000130147	SH3BP4	transcript	0.446505	0	Inf	0.0106565	0.582996	up
ENST00000244458	ENSG00000124507	PACSIN1	transcript	0.548365	0	Inf	0.0106574	0.582996	up
ENST00000368297	ENSG00000160789	LMNA	transcript	0.486766	0	Inf	0.0106817	0.583865	up
ENST00000347849	ENSG00000072135	PTPN18	transcript	0.305243	0	Inf	0.0107371	0.586353	up
ENST00000619145	ENSG00000174669	SLC29A2	transcript	0.972649	0	Inf	0.0107566	0.586519	up
ENST00000381019	ENSG00000100416	TRMU	transcript	0	1.68214	#NAME?	0.0107717	0.586519	down
ENST00000381718	ENSG00000139496	NUP58	transcript	0	0.929472	#NAME?	0.0107717	0.586519	down
ENST00000611820	ENSG00000147050	KDM6A	transcript	5.93816	0.232408	4.67528	0.0108081	0.587933	up
ENST00000446718	ENSG00000105778	AVL9	transcript	0.357776	0	Inf	0.0108269	0.588671	up
ENST00000470258	ENSG00000188811	NHLRC3	transcript	0.0144495	1.94292	-7.07107	0.0108446	0.589141	down
ENST00000513574	ENSG00000164116	GUCY1A1	transcript	0.863502	0	Inf	0.0108459	0.589141	up
ENST00000620693	ENSG00000124507	PACSIN1	transcript	0.034136	1.05878	-4.95496	0.0108517	0.589169	down
ENST00000302850	ENSG00000171105	INSR	transcript	0.186641	0	Inf	0.0108669	0.589341	up
ENST00000482695	ENSG00000185621	LMLN	transcript	0.685565	0	Inf	0.0108669	0.589341	up
ENST00000371432	ENSG00000124813	RUNX2	transcript	0.0001405	0.249022	-10.7915	0.0108705	0.589341	down
ENST00000411612	ENSG00000131149	GSE1	transcript	0.964877	0	Inf	0.0108958	0.590338	up
ENST00000564488	ENSG00000138629	UBL7	transcript	0	1.56355	#NAME?	0.0109077	0.590338	down
ENST00000412676	ENSG00000174600	CMKLR1	transcript	0	0.448784	#NAME?	0.0109114	0.590338	down
ENST00000406391	ENSG00000183023	SLC8A1	transcript	0	0.815993	#NAME?	0.0109146	0.590338	down
ENST00000369325	ENSG00000135341	MAP3K7	transcript	0	0.496847	#NAME?	0.010915	0.590338	down
ENST00000257770	ENSG00000135318	NT5E	transcript	0.029982	1.10318	-5.20143	0.0109307	0.590907	down
ENST00000310706	ENSG00000173801	JUP	transcript	0.70622	0	Inf	0.0109724	0.592349	up
ENST00000330912	ENSG00000183479	TREX2	transcript	1.00401	0	Inf	0.0109741	0.592349	up
ENST00000540764	ENSG00000163378	EOGT	transcript	0.511475	0	Inf	0.0110693	0.596375	up
ENST00000642416	ENSG00000126705	AHDC1	transcript	0.406843	0	Inf	0.0110694	0.596375	up
ENST00000527968	ENSG00000149809	TM7SF2	transcript	1.56916	0	Inf	0.0111037	0.597223	up
ENST00000417137	ENSG00000099956	SMARCB1	transcript	0.84148	0	Inf	0.0111042	0.597223	up
ENST00000520179	ENSG00000168575	SLC20A2	transcript	3.16371	0.143312	4.46439	0.0111079	0.597223	up
ENST00000505036	ENSG00000109390	NDUFC1	transcript	0	2.78778	#NAME?	0.0111162	0.597223	down
ENST00000620862	ENSG00000153094	BCL2L11	transcript	0.428058	0.011786	5.18266	0.0111294	0.597647	up
ENST00000417952	ENSG00000175166	PSMD2	transcript	1.11731	0	Inf	0.0111612	0.598989	up
ENST00000646693	ENSG00000127616	SMARCA4	transcript	0.0073305	0.489878	-6.06237	0.0111787	0.599157	down
ENST00000377661	ENSG00000164574	GALNT10	transcript	0.590457	0	Inf	0.011201	0.599538	up
ENST00000436111	ENSG00000065243	PKN2	transcript	0	1.20058	#NAME?	0.0112134	0.599538	down
ENST00000410020	ENSG00000135636	DYSF	transcript	0.333834	0	Inf	0.0112177	0.599538	up
ENST00000602551	ENSG00000102981	PARD6A	transcript	1.38421	0.024834	5.80061	0.0112315	0.599711	up
ENST00000585981	ENSG00000108946	PRKAR1A	transcript	0.763691	0	Inf	0.0112463	0.600215	up
ENST00000567134	ENSG00000169371	SNUPN	transcript	0.076193	1.66998	-4.45403	0.0112852	0.601608	down
ENST00000569651	ENSG00000178188	SH2B1	transcript	0	2.72535	#NAME?	0.0113061	0.601608	down
ENST00000526600	ENSG00000187079	TEAD1	transcript	0	0.0916295	#NAME?	0.0113212	0.601608	down
ENST00000380043	ENSG00000047634	SCML1	transcript	0.822607	0	Inf	0.0113292	0.601608	up
ENST00000335841	ENSG00000083838	ZNF446	transcript	1.17016	0	Inf	0.0113331	0.601608	up
ENST00000618468	ENSG00000171631	P2RY6	transcript	0	0.313184	#NAME?	0.0113332	0.601608	down
ENST00000278849	ENSG00000149503	INCENP	transcript	0.597587	0	Inf	0.0113333	0.601608	up
ENST00000308317	ENSG00000092208	GEMIN2	transcript	1.55278	0	Inf	0.0113333	0.601608	up
ENST00000350490	ENSG00000072518	MARK2	transcript	2.17023	0.016009	7.08282	0.0113664	0.602928	up
ENST00000449796	ENSG00000088387	DOCK9	transcript	0.292936	5.62831	-4.26405	0.0114266	0.604997	down
ENST00000512834	ENSG00000164306	PRIMPOL	transcript	1.05981	0	Inf	0.0114452	0.604997	up
ENST00000403427	ENSG00000184164	CRELD2	transcript	1.84942	0	Inf	0.0114483	0.604997	up
ENST00000321998	ENSG00000167186	COQ7	transcript	0.824957	0	Inf	0.0114767	0.605935	up
ENST00000336126	ENSG00000180628	PCGF5	transcript	0.608919	0.009515	5.9999	0.0115209	0.607913	up
ENST00000415585	ENSG00000101811	CSTF2	transcript	0.203772	3.20706	-3.97622	0.0115249	0.607913	down
ENST00000504691	ENSG00000145730	PAM	transcript	0	1.55344	#NAME?	0.0115617	0.608988	down
ENST00000576343	ENSG00000185813	PCYT2	transcript	0.757903	0	Inf	0.0115729	0.608988	up
ENST00000290178	ENSG00000159086	PAXBP1	transcript	2.43923	0.185527	3.71672	0.0115769	0.608988	up
ENST00000439537	ENSG00000189077	TMEM120A	transcript	0.654372	0	Inf	0.0115772	0.608988	up
ENST00000602748	ENSG00000055130	CUL1	transcript	0.038271	6.43622	-7.39382	0.0115912	0.608988	down
ENST00000539642	ENSG00000069943	PIGB	transcript	1.30037	0	Inf	0.0116023	0.608988	up
ENST00000397853	ENSG00000165795	NDRG2	transcript	1.05164	0	Inf	0.0116067	0.608988	up
ENST00000371515	ENSG00000020256	ZFP64	transcript	0.718711	0	Inf	0.0116071	0.608988	up
ENST00000590460	ENSG00000168101	NUDT16L1	transcript	0	3.2267	#NAME?	0.0116098	0.608988	down
ENST00000563024	ENSG00000058600	POLR3E	transcript	0	1.64198	#NAME?	0.0116154	0.608988	down
ENST00000503641	ENSG00000159199	ATP5MC1	transcript	1.46645	0	Inf	0.0116538	0.610624	up
ENST00000419020	ENSG00000198563	DDX39B	transcript	1.24206	0	Inf	0.0116626	0.610624	up
ENST00000431125	ENSG00000197114	ZGPAT	transcript	1.94484	0	Inf	0.0116669	0.610624	up
ENST00000320816	ENSG00000153071	DAB2	transcript	0.0037195	0.904509	-7.92588	0.0116879	0.611374	down
ENST00000382164	ENSG00000058866	DGKG	transcript	0.683397	0	Inf	0.0116945	0.611437	up
ENST00000631460	ENSG00000048740	CELF2	transcript	5e-07	0.719348	-20.4563	0.0117042	0.611602	down
ENST00000377708	ENSG00000186470	BTN3A2	transcript	0.77832	11.2722	-3.85626	0.0117085	0.611602	down
ENST00000454523	ENSG00000163374	YY1AP1	transcript	0.878361	0	Inf	0.0117286	0.612093	up
ENST00000567659	ENSG00000167371	PRRT2	transcript	0.478816	0	Inf	0.0117299	0.612093	up
ENST00000427512	ENSG00000197128	ZNF772	transcript	0.438578	0	Inf	0.0117342	0.612093	up
ENST00000369041	ENSG00000143382	ADAMTSL4	transcript	2.26095	0.063999	5.14274	0.0117734	0.613859	up
ENST00000594009	ENSG00000090554	FLT3LG	transcript	9.77948	0.570271	4.10004	0.01178	0.613919	up
ENST00000330198	ENSG00000185621	LMLN	transcript	0.0714415	0.982919	-3.78224	0.0117971	0.614242	down
ENST00000451429	ENSG00000130695	CEP85	transcript	0.237023	0	Inf	0.0118077	0.614511	up
ENST00000378300	ENSG00000198467	TPM2	transcript	2.16802	0	Inf	0.0118657	0.616404	up
ENST00000643341	ENSG00000171453	POLR1C	transcript	1.08656	0	Inf	0.0118862	0.616404	up
ENST00000243050	ENSG00000123358	NR4A1	transcript	0.798684	0	Inf	0.0118894	0.616404	up
ENST00000636887	ENSG00000156299	TIAM1	transcript	7.03143	0.301912	4.54161	0.0118995	0.616404	up
ENST00000643085	ENSG00000177189	RPS6KA3	transcript	0	0.531702	#NAME?	0.0119003	0.616404	down
ENST00000561026	ENSG00000028528	SNX1	transcript	0	1.56898	#NAME?	0.0119004	0.616404	down
ENST00000564241	ENSG00000166454	ATMIN	transcript	0.44052	0	Inf	0.0119039	0.616404	up
ENST00000568671	ENSG00000172775	FAM192A	transcript	3.49312	0	Inf	0.011904	0.616404	up
ENST00000545968	ENSG00000134571	MYBPC3	transcript	0.36937	0.002475	7.22149	0.0119562	0.618275	up
ENST00000480013	ENSG00000163539	CLASP2	transcript	7.35518	0.853607	3.10712	0.0119642	0.618275	up
ENST00000553659	ENSG00000072110	ACTN1	transcript	0	1.67138	#NAME?	0.0119908	0.618275	down
ENST00000580981	ENSG00000158201	ABHD3	transcript	0	1.21372	#NAME?	0.0120035	0.618275	down
ENST00000409124	ENSG00000196151	WDSUB1	transcript	0	1.38942	#NAME?	0.0120038	0.618275	down
ENST00000335858	ENSG00000185379	RAD51D	transcript	0	0.543281	#NAME?	0.0120206	0.618275	down
ENST00000425583	ENSG00000109180	OCIAD1	transcript	0.767601	0.0071445	6.74738	0.0120261	0.618275	up
ENST00000449505	ENSG00000163939	PBRM1	transcript	1.38628	0	Inf	0.0120618	0.619748	up
ENST00000571643	ENSG00000004897	CDC27	transcript	1.49265	0	Inf	0.0120828	0.620545	up
ENST00000223865	ENSG00000107021	TBC1D13	transcript	0.618969	0	Inf	0.0121573	0.624085	up
ENST00000429002	ENSG00000198431	TXNRD1	transcript	0	0.231708	#NAME?	0.0121677	0.624334	down
ENST00000310513	ENSG00000149187	CELF1	transcript	1.20725	16.569	-3.77869	0.012234	0.627453	down
ENST00000613943	ENSG00000108604	SMARCD2	transcript	0.015722	1.73747	-6.78806	0.0122474	0.627706	down
ENST00000274056	ENSG00000145416	43525	transcript	0	0.407626	#NAME?	0.0122674	0.627706	down
ENST00000375895	ENSG00000204438	GPANK1	transcript	0	1.20772	#NAME?	0.0122675	0.627706	down
ENST00000528545	ENSG00000142186	SCYL1	transcript	0	0.764498	#NAME?	0.012269	0.627706	down
ENST00000417981	ENSG00000130159	ECSIT	transcript	2.14496	0	Inf	0.0122722	0.627706	up
ENST00000303143	ENSG00000171812	COL8A2	transcript	0.194351	0	Inf	0.0123159	0.628599	up
ENST00000636537	ENSG00000104763	ASAH1	transcript	1.96079	0	Inf	0.0123398	0.628599	up
ENST00000359541	ENSG00000115207	GTF3C2	transcript	5.93728	0.655853	3.17836	0.0123958	0.630253	up
ENST00000526601	ENSG00000005801	ZNF195	transcript	0	1.03926	#NAME?	0.012397	0.630253	down
ENST00000356764	ENSG00000077157	PPP1R12B	transcript	0	1.23868	#NAME?	0.0124001	0.630253	down
ENST00000519865	ENSG00000145860	RNF145	transcript	0.618254	0	Inf	0.0124125	0.630317	up
ENST00000375703	ENSG00000204410	MSH5	transcript	0.791256	0	Inf	0.0124125	0.630317	up
ENST00000322610	ENSG00000178188	SH2B1	transcript	0.752384	0.02148	5.1304	0.012445	0.631401	up
ENST00000430839	ENSG00000187860	CCDC157	transcript	0.784042	0	Inf	0.0125111	0.633539	up
ENST00000493678	ENSG00000116288	PARK7	transcript	1.88306	0	Inf	0.0125131	0.633539	up
ENST00000543238	ENSG00000103227	LMF1	transcript	0.977361	0	Inf	0.0125152	0.633539	up
ENST00000419169	ENSG00000116698	SMG7	transcript	0	0.832852	#NAME?	0.0125277	0.633672	down
ENST00000352393	ENSG00000214078	CPNE1	transcript	4.75985	0.350407	3.76381	0.0125343	0.633672	up
ENST00000383716	ENSG00000168297	PXK	transcript	0.002073	1.28936	-9.28072	0.0125395	0.633672	down
ENST00000457772	ENSG00000073849	ST6GAL1	transcript	0.540574	0	Inf	0.0125403	0.633672	up
ENST00000397570	ENSG00000185507	IRF7	transcript	0.475556	0	Inf	0.0125795	0.635369	up
ENST00000602243	ENSG00000179134	SAMD4B	transcript	1.00948	0	Inf	0.0125936	0.635799	up
ENST00000338145	ENSG00000109332	UBE2D3	transcript	0.748487	0	Inf	0.0126837	0.63882	up
ENST00000528048	ENSG00000204370	SDHD	transcript	0.86416	0	Inf	0.0126873	0.63882	up
ENST00000458478	ENSG00000168028	RPSA	transcript	22.258	178.64	-3.00466	0.0127015	0.63923	down
ENST00000346617	ENSG00000020256	ZFP64	transcript	0	0.716319	#NAME?	0.0127108	0.63923	down
ENST00000619513	ENSG00000235750	KIAA0040	transcript	3.49683	0.349745	3.32167	0.0127124	0.63923	up
ENST00000393588	ENSG00000164305	CASP3	transcript	0	1.20398	#NAME?	0.0127319	0.639925	down
ENST00000378538	ENSG00000066336	SPI1	transcript	6.22222	0.278465	4.48186	0.0127415	0.640123	up
ENST00000405413	ENSG00000173083	HPSE	transcript	0.453672	0	Inf	0.012767	0.640739	up
ENST00000223361	ENSG00000106628	POLD2	transcript	1.262	0	Inf	0.0128268	0.642449	up
ENST00000352591	ENSG00000079385	CEACAM1	transcript	0.638398	0	Inf	0.0128271	0.642449	up
ENST00000358375	ENSG00000170909	OSCAR	transcript	1.45653	0	Inf	0.0128276	0.642449	up
ENST00000352966	ENSG00000171033	PKIA	transcript	1.16047	0	Inf	0.0128484	0.643207	up
ENST00000382533	ENSG00000150459	SAP18	transcript	0.028067	1.88885	-6.07249	0.0128714	0.643785	down
ENST00000340930	ENSG00000169398	PTK2	transcript	0.870084	0.0011255	9.59444	0.0128816	0.644009	up
ENST00000567963	ENSG00000188603	CLN3	transcript	0	1.45744	#NAME?	0.0129332	0.64422	down
ENST00000537927	ENSG00000110841	PPFIBP1	transcript	0	0.368103	#NAME?	0.012935	0.64422	down
ENST00000585479	ENSG00000105355	PLIN3	transcript	1.35453	0	Inf	0.0129474	0.64422	up
ENST00000294401	ENSG00000007923	DNAJC11	transcript	0.943349	0	Inf	0.0129485	0.64422	up
ENST00000265637	ENSG00000110075	PPP6R3	transcript	0.141786	0	Inf	0.0129724	0.644981	up
ENST00000610350	ENSG00000274226	TBC1D3H	transcript	0.330634	0	Inf	0.0129752	0.644981	up
ENST00000513225	ENSG00000169045	HNRNPH1	transcript	2.47462	0	Inf	0.0130306	0.646603	up
ENST00000404276	ENSG00000183765	CHEK2	transcript	1.11997	0	Inf	0.0130307	0.646603	up
ENST00000393158	ENSG00000170962	PDGFD	transcript	0.0552135	1.11861	-4.34054	0.0130788	0.648136	down
ENST00000359883	ENSG00000147853	AK3	transcript	0	1.30363	#NAME?	0.0130929	0.648233	down
ENST00000347140	ENSG00000179912	R3HDM2	transcript	0.13402	5.42002	-5.33778	0.013095	0.648233	down
ENST00000369638	ENSG00000155366	RHOC	transcript	7.57345	0.126571	5.90293	0.0131052	0.648308	up
ENST00000554511	ENSG00000100796	PPP4R3A	transcript	1.16469	0	Inf	0.0131698	0.649449	up
ENST00000630424	ENSG00000114062	UBE3A	transcript	0.334139	5.70768	-4.09439	0.0131846	0.649449	down
ENST00000458643	ENSG00000169203	NPIPB12	transcript	0	1.54456	#NAME?	0.0131873	0.649449	down
ENST00000571721	ENSG00000184009	ACTG1	transcript	2.42803	0	Inf	0.0131909	0.649449	up
ENST00000378421	ENSG00000185753	CXorf38	transcript	0.832921	0	Inf	0.0131915	0.649449	up
ENST00000379277	ENSG00000089063	TMEM230	transcript	2.07206	0.102673	4.33494	0.013223	0.650043	up
ENST00000443964	ENSG00000068745	IP6K2	transcript	0.76276	0	Inf	0.0132261	0.650043	up
ENST00000539551	ENSG00000119242	CCDC92	transcript	0.78691	0	Inf	0.0132564	0.651181	up
ENST00000422871	ENSG00000138964	PARVG	transcript	8.20316	0.326755	4.6499	0.0132669	0.651181	up
ENST00000409297	ENSG00000065802	ASB1	transcript	0.770657	0	Inf	0.013296	0.652322	up
ENST00000398803	ENSG00000119471	HSDL2	transcript	0.656748	0	Inf	0.0133282	0.653065	up
ENST00000469762	ENSG00000113810	SMC4	transcript	0.491394	0	Inf	0.0133282	0.653065	up
ENST00000371509	ENSG00000116171	SCP2	transcript	1.03729	0	Inf	0.0133285	0.653065	up
ENST00000339728	ENSG00000188042	ARL4C	transcript	129.463	18.9539	2.77198	0.0133578	0.654033	up
ENST00000419023	ENSG00000136631	VPS45	transcript	1.38533	0	Inf	0.0133713	0.654033	up
ENST00000647401	ENSG00000115355	CCDC88A	transcript	0.224889	0	Inf	0.0133713	0.654033	up
ENST00000349014	ENSG00000101126	ADNP	transcript	15.3301	0.879225	4.12399	0.0133907	0.654697	up
ENST00000538765	ENSG00000006194	ZNF263	transcript	0.133404	4.28051	-5.00391	0.0134368	0.656279	down
ENST00000555833	ENSG00000100578	KIAA0586	transcript	0	2.3194	#NAME?	0.013446	0.656279	down
ENST00000377894	ENSG00000083544	TDRD3	transcript	0.820754	0	Inf	0.0134847	0.656713	up
ENST00000393451	ENSG00000004866	ST7	transcript	0	0.958867	#NAME?	0.013535	0.658102	down
ENST00000525962	ENSG00000069702	TGFBR3	transcript	1.07996	11.4699	-3.40881	0.0135659	0.659064	down
ENST00000607124	ENSG00000124635	HIST1H2BJ	transcript	0.0554615	1.98847	-5.16403	0.0135675	0.659064	down
ENST00000584985	ENSG00000126351	THRA	transcript	0	0.806809	#NAME?	0.0135953	0.659825	down
ENST00000636836	ENSG00000126088	UROD	transcript	1.71615	0	Inf	0.0136041	0.659825	up
ENST00000529142	ENSG00000143393	PI4KB	transcript	0.777068	0	Inf	0.0136045	0.659825	up
ENST00000428394	ENSG00000180353	HCLS1	transcript	1.28974	0	Inf	0.0136065	0.659825	up
ENST00000356113	ENSG00000166035	LIPC	transcript	0	0.343699	#NAME?	0.0136126	0.659837	down
ENST00000373314	ENSG00000136830	FAM129B	transcript	0.511687	0	Inf	0.013631	0.660163	up
ENST00000557080	ENSG00000065357	DGKA	transcript	1.4391	0	Inf	0.0136547	0.660772	up
ENST00000594087	ENSG00000104983	CCDC61	transcript	0.712202	0	Inf	0.0136553	0.660772	up
ENST00000219320	ENSG00000103042	SLC38A7	transcript	0.778197	0.002824	8.10625	0.013665	0.660962	up
ENST00000299178	ENSG00000166148	AVPR1A	transcript	0	0.119238	#NAME?	0.0136782	0.661314	down
ENST00000423313	ENSG00000235750	KIAA0040	transcript	0.522237	6.24409	-3.57971	0.0137216	0.662848	down
ENST00000536122	ENSG00000141013	GAS8	transcript	0.388405	0	Inf	0.0137238	0.662848	up
ENST00000415803	ENSG00000164542	KIAA0895	transcript	0.276583	0	Inf	0.0137275	0.662848	up
ENST00000334497	ENSG00000183479	TREX2	transcript	0	1.02035	#NAME?	0.0137534	0.663817	down
ENST00000259997	ENSG00000137449	CPEB2	transcript	0.337985	0	Inf	0.013807	0.664928	up
ENST00000349503	ENSG00000114026	OGG1	transcript	0	0.990466	#NAME?	0.0138081	0.664928	down
ENST00000535149	ENSG00000147140	NONO	transcript	0.654409	0	Inf	0.0138117	0.664928	up
ENST00000409772	ENSG00000156973	PDE6D	transcript	0.994935	0	Inf	0.0138512	0.666542	up
ENST00000621083	ENSG00000131115	ZNF227	transcript	0.811778	0.000826	9.94073	0.0138603	0.6667	up
ENST00000461940	ENSG00000133574	GIMAP4	transcript	2.56318	0.0416425	5.94373	0.0138763	0.667185	up
ENST00000369838	ENSG00000198478	SH3BGRL2	transcript	0.192256	2.16089	-3.49053	0.0138943	0.667764	down
ENST00000370695	ENSG00000198689	SLC9A6	transcript	0.301372	2.89962	-3.26625	0.0139009	0.667799	down
ENST00000640451	ENSG00000042429	MED17	transcript	1.16034	0	Inf	0.0139157	0.668218	up
ENST00000321826	ENSG00000244165	P2RY11	transcript	10.5353	0.446962	4.55894	0.0139269	0.668218	up
ENST00000430575	ENSG00000129824	RPS4Y1	transcript	4.431	0.001592	11.4426	0.0139274	0.668218	up
ENST00000504381	ENSG00000017260	ATP2C1	transcript	0	0.541302	#NAME?	0.0139839	0.669805	down
ENST00000399935	ENSG00000156265	MAP3K7CL	transcript	0	0.905297	#NAME?	0.0139841	0.669805	down
ENST00000543152	ENSG00000103544	VPS35L	transcript	0	0.999298	#NAME?	0.0140371	0.672058	down
ENST00000398576	ENSG00000136167	LCP1	transcript	2.22058	0.061707	5.16936	0.0140604	0.672603	up
ENST00000219551	ENSG00000103269	RHBDL1	transcript	1.25606	0	Inf	0.0140743	0.672982	up
ENST00000240423	ENSG00000121152	NCAPH	transcript	0	0.707897	#NAME?	0.0140992	0.673514	down
ENST00000620084	ENSG00000122986	HVCN1	transcript	1.19234	0	Inf	0.0141312	0.673514	up
ENST00000600537	ENSG00000063176	SPHK2	transcript	0.873469	0	Inf	0.0141329	0.673514	up
ENST00000561722	ENSG00000187741	FANCA	transcript	2.67052	0	Inf	0.0141342	0.673514	up
ENST00000377991	ENSG00000137103	TMEM8B	transcript	0.132253	0	Inf	0.0141386	0.673514	up
ENST00000357590	ENSG00000137700	SLC37A4	transcript	1.31534	0.041355	4.99123	0.014163	0.673514	up
ENST00000373998	ENSG00000147130	ZMYM3	transcript	2.8965	0.0937155	4.94988	0.0141666	0.673514	up
ENST00000356957	ENSG00000153066	TXNDC11	transcript	1.7816	0.067394	4.72441	0.0141753	0.673514	up
ENST00000608326	ENSG00000203872	C6orf163	transcript	0	0.895728	#NAME?	0.0141809	0.673514	down
ENST00000372383	ENSG00000157514	TSC22D3	transcript	26.0027	2.84136	3.19401	0.0141821	0.673514	up
ENST00000565760	ENSG00000172775	FAM192A	transcript	0	2.84646	#NAME?	0.0141836	0.673514	down
ENST00000442092	ENSG00000004534	RBM6	transcript	0	0.832862	#NAME?	0.0141845	0.673514	down
ENST00000424443	ENSG00000140391	TSPAN3	transcript	0	1.23115	#NAME?	0.0141867	0.673514	down
ENST00000453551	ENSG00000179950	PUF60	transcript	1.04679	0	Inf	0.0142291	0.674961	up
ENST00000540664	ENSG00000196233	LCOR	transcript	0	0.87305	#NAME?	0.0142424	0.675062	down
ENST00000344537	ENSG00000047579	DTNBP1	transcript	0.025387	2.48477	-6.61288	0.0142802	0.67564	down
ENST00000555181	ENSG00000100744	GSKIP	transcript	0.000818	1.53296	-10.8719	0.0142806	0.67564	down
ENST00000322008	ENSG00000177697	CD151	transcript	0.420459	0	Inf	0.0142904	0.67564	up
ENST00000380258	ENSG00000166803	PCLAF	transcript	0.713108	0	Inf	0.0142961	0.67564	up
ENST00000585815	ENSG00000108946	PRKAR1A	transcript	3.35008	0	Inf	0.0143006	0.67564	up
ENST00000570606	ENSG00000070366	SMG6	transcript	1.11433	0	Inf	0.0143032	0.67564	up
ENST00000566397	ENSG00000205937	RNPS1	transcript	17.3639	0.384878	5.49555	0.0143232	0.676303	up
ENST00000592745	ENSG00000130023	ERMARD	transcript	1.34975	0	Inf	0.0143312	0.676399	up
ENST00000373831	ENSG00000180198	RCC1	transcript	1.93737	0.0786105	4.62323	0.0143801	0.67814	up
ENST00000617947	ENSG00000130598	TNNI2	transcript	1.07575	0	Inf	0.0143955	0.678584	up
ENST00000396833	ENSG00000213920	MDP1	transcript	1.09634	0	Inf	0.0144069	0.678837	up
ENST00000445537	ENSG00000151490	PTPRO	transcript	0.017358	0.560469	-5.01296	0.01446	0.681054	down
ENST00000521789	ENSG00000141698	NT5C3B	transcript	0	1.93523	#NAME?	0.0144775	0.681563	down
ENST00000545356	ENSG00000168116	KIAA1586	transcript	0.154782	3.49684	-4.49774	0.0144957	0.681563	down
ENST00000563104	ENSG00000166747	AP1G1	transcript	1.39926	0.007698	7.50597	0.014503	0.681563	up
ENST00000546211	ENSG00000145604	SKP2	transcript	1.14349	0	Inf	0.0145085	0.681563	up
ENST00000373750	ENSG00000149636	DSN1	transcript	0.816163	0	Inf	0.0145129	0.681563	up
ENST00000353267	ENSG00000118260	CREB1	transcript	1.75007	13.0586	-2.89951	0.0145504	0.683036	down
ENST00000611678	ENSG00000059915	PSD	transcript	0.559724	0	Inf	0.0146138	0.68402	up
ENST00000558096	ENSG00000100889	PCK2	transcript	0.77646	0	Inf	0.0146175	0.68402	up
ENST00000529842	ENSG00000178685	PARP10	transcript	2.7083	0	Inf	0.0146208	0.68402	up
ENST00000347471	ENSG00000139613	SMARCC2	transcript	0.492319	0	Inf	0.0146242	0.68402	up
ENST00000645245	ENSG00000149970	CNKSR2	transcript	0	0.365616	#NAME?	0.0146375	0.68402	down
ENST00000507488	ENSG00000017260	ATP2C1	transcript	0	0.516675	#NAME?	0.0146384	0.68402	down
ENST00000414771	ENSG00000112031	MTRF1L	transcript	0	0.570048	#NAME?	0.0146386	0.68402	down
ENST00000534428	ENSG00000167257	RNF214	transcript	1.30518	0	Inf	0.0146508	0.68402	up
ENST00000376372	ENSG00000196998	WDR45	transcript	0.357243	5.21818	-3.86857	0.0146644	0.68402	down
ENST00000536393	ENSG00000135093	USP30	transcript	1.40591	0	Inf	0.0146706	0.68402	up
ENST00000529275	ENSG00000177963	RIC8A	transcript	1.47165	0	Inf	0.0146735	0.68402	up
ENST00000457841	ENSG00000198925	ATG9A	transcript	0.928916	0	Inf	0.014674	0.68402	up
ENST00000646107	ENSG00000215301	DDX3X	transcript	2e-06	0.92789	-18.8236	0.0146743	0.68402	down
ENST00000555993	ENSG00000006432	MAP3K9	transcript	0.0143635	0.803893	-5.80652	0.0147155	0.685558	down
ENST00000611119	ENSG00000269556	TMEM185A	transcript	0.677956	0	Inf	0.0147254	0.685558	up
ENST00000468145	ENSG00000186577	SMIM29	transcript	1.99791	0	Inf	0.0147254	0.685558	up
ENST00000537272	ENSG00000149716	ORAOV1	transcript	0	0.69632	#NAME?	0.0147409	0.685654	down
ENST00000421374	ENSG00000100014	SPECC1L	transcript	0.058039	1.33307	-4.52158	0.0147828	0.687095	down
ENST00000423670	ENSG00000000457	SCYL3	transcript	0	0.875233	#NAME?	0.0148191	0.687647	down
ENST00000518068	ENSG00000198363	ASPH	transcript	0.683431	0	Inf	0.0148209	0.687647	up
ENST00000339497	ENSG00000108100	CCNY	transcript	0	0.392462	#NAME?	0.0148235	0.687647	down
ENST00000639405	ENSG00000101336	HCK	transcript	0	1.15685	#NAME?	0.0148251	0.687647	down
ENST00000533431	ENSG00000170325	PRDM10	transcript	0.378374	0	Inf	0.0149007	0.690588	up
ENST00000544583	ENSG00000159842	ABR	transcript	0.132626	3.65613	-4.78488	0.0149124	0.690849	down
ENST00000380384	ENSG00000137154	RPS6	transcript	19.4777	214.259	-3.45946	0.0149618	0.69285	down
ENST00000453141	ENSG00000115677	HDLBP	transcript	1.78753	0	Inf	0.0149729	0.693082	up
ENST00000299135	ENSG00000140153	WDR20	transcript	1.11778	0.0177125	5.97973	0.0150025	0.69391	up
ENST00000508423	ENSG00000170871	KIAA0232	transcript	0.135351	5.49618	-5.34365	0.0150031	0.69391	down
ENST00000585778	ENSG00000007264	MATK	transcript	0.931244	0	Inf	0.015024	0.69431	up
ENST00000533455	ENSG00000164733	CTSB	transcript	11.3316	0.159614	6.14962	0.0150538	0.695401	up
ENST00000382873	ENSG00000066926	FECH	transcript	1.84786	0.138946	3.73326	0.0150637	0.695403	up
ENST00000377107	ENSG00000102226	USP11	transcript	0.146396	1.95822	-3.7416	0.0150661	0.695403	down
ENST00000315423	ENSG00000168884	TNIP2	transcript	2.68375	0.218351	3.61953	0.0150846	0.695453	up
ENST00000303113	ENSG00000159147	DONSON	transcript	1.82055	0.0395365	5.52504	0.0150958	0.695453	up
ENST00000528184	ENSG00000254469	AP002495.2	transcript	1.67458	0.021889	6.25745	0.0151109	0.695453	up
ENST00000601808	ENSG00000186272	ZNF17	transcript	0.698917	0	Inf	0.0151111	0.695453	up
ENST00000577432	ENSG00000141562	NARF	transcript	2.03651	0	Inf	0.0151112	0.695453	up
ENST00000606253	ENSG00000167604	NFKBID	transcript	1.01417	0	Inf	0.0151142	0.695453	up
ENST00000378402	ENSG00000205038	PKHD1L1	transcript	0.0076725	0.191097	-4.63846	0.0151294	0.695486	down
ENST00000409164	ENSG00000243667	WDR92	transcript	0.461956	0	Inf	0.0151957	0.697966	up
ENST00000589181	ENSG00000130812	ANGPTL6	transcript	0.038272	1.14459	-4.90239	0.0152175	0.698681	down
ENST00000464167	ENSG00000182899	RPL35A	transcript	4.24316	40.2609	-3.24617	0.0152684	0.699978	down
ENST00000469391	ENSG00000107099	DOCK8	transcript	0.501054	17.962	-5.16384	0.0152705	0.699978	down
ENST00000306645	ENSG00000178927	CYBC1	transcript	0.707617	0.001112	9.31367	0.015293	0.700188	up
ENST00000244711	ENSG00000124733	MEA1	transcript	0	1.63995	#NAME?	0.0153059	0.700464	down
ENST00000382911	ENSG00000166845	C18orf54	transcript	0.42915	0	Inf	0.0153648	0.702593	up
ENST00000487861	ENSG00000182185	RAD51B	transcript	1.78565	0.106157	4.07218	0.0153819	0.702647	up
ENST00000605057	ENSG00000100813	ACIN1	transcript	0.137875	7.96956	-5.85307	0.0153864	0.702647	down
ENST00000577886	ENSG00000221926	TRIM16	transcript	0.045264	1.05403	-4.5414	0.0153869	0.702647	down
ENST00000454838	ENSG00000177830	CHID1	transcript	0.53615	0	Inf	0.0153989	0.702647	up
ENST00000399050	ENSG00000198561	CTNND1	transcript	0.276294	0	Inf	0.0154032	0.702647	up
ENST00000440238	ENSG00000183773	AIFM3	transcript	0.736247	0	Inf	0.0154033	0.702647	up
ENST00000391826	ENSG00000104951	IL4I1	transcript	1.13564	0.0418185	4.76322	0.0154146	0.702864	up
ENST00000371893	ENSG00000137216	TMEM63B	transcript	0.619898	0	Inf	0.0154298	0.702864	up
ENST00000331393	ENSG00000115109	EPB41L5	transcript	1.01789	0	Inf	0.0154329	0.702864	up
ENST00000472031	ENSG00000173786	CNP	transcript	0	0.660524	#NAME?	0.0154611	0.703605	down
ENST00000361042	ENSG00000132970	WASF3	transcript	0	0.144428	#NAME?	0.0154616	0.703605	down
ENST00000567028	ENSG00000260861	AL049634.2	transcript	1.33736	0	Inf	0.0154861	0.703822	up
ENST00000602320	ENSG00000102977	ACD	transcript	0	1.29301	#NAME?	0.0155027	0.703822	down
ENST00000603187	ENSG00000214655	ZSWIM8	transcript	0	0.487306	#NAME?	0.0155031	0.703822	down
ENST00000431156	ENSG00000129696	TTI2	transcript	0	0.772504	#NAME?	0.0155062	0.703822	down
ENST00000560494	ENSG00000137776	SLTM	transcript	1.02506	0	Inf	0.0155173	0.703822	up
ENST00000575086	ENSG00000004975	DVL2	transcript	0.696287	0	Inf	0.0155255	0.703822	up
ENST00000345094	ENSG00000134077	THUMPD3	transcript	0.256665	4.08561	-3.99259	0.0155256	0.703822	down
ENST00000523130	ENSG00000197892	KIF13B	transcript	0.503096	0	Inf	0.0155287	0.703822	up
ENST00000409650	ENSG00000071082	RPL31	transcript	0.001416	4.09837	-11.499	0.0155717	0.705206	down
ENST00000613047	ENSG00000154511	FAM69A	transcript	1.87118	0.05891	4.98929	0.0155787	0.705242	up
ENST00000418800	ENSG00000204580	DDR1	transcript	0	0.492007	#NAME?	0.0155912	0.705243	down
ENST00000435683	ENSG00000064687	ABCA7	transcript	12.2344	1.41685	3.11018	0.0156341	0.706617	up
ENST00000361818	ENSG00000034152	MAP2K3	transcript	0.843058	0	Inf	0.0156473	0.706649	up
ENST00000398497	ENSG00000173276	ZBTB21	transcript	0.017161	4.6129	-8.0704	0.015685	0.708069	down
ENST00000642987	ENSG00000163864	NMNAT3	transcript	0.324549	0	Inf	0.0157161	0.709186	up
ENST00000566433	ENSG00000121281	ADCY7	transcript	0.225771	3.27077	-3.8567	0.015789	0.711157	down
ENST00000370172	ENSG00000166169	POLL	transcript	5e-07	0.549709	-20.0683	0.0157925	0.711157	down
ENST00000350320	ENSG00000122545	SEPT7	transcript	6.00434	0.755957	2.98963	0.0157967	0.711157	up
ENST00000369327	ENSG00000135341	MAP3K7	transcript	0	0.382655	#NAME?	0.0158005	0.711157	down
ENST00000451158	ENSG00000196652	ZKSCAN5	transcript	0	0.557898	#NAME?	0.0158033	0.711157	down
ENST00000380569	ENSG00000137878	GCOM1	transcript	0	0.936466	#NAME?	0.0158038	0.711157	down
ENST00000611543	ENSG00000128271	ADORA2A	transcript	0.741855	0	Inf	0.0158485	0.711294	up
ENST00000570054	ENSG00000260914	AC026464.4	transcript	1.38629	0	Inf	0.0158486	0.711294	up
ENST00000539214	ENSG00000065154	OAT	transcript	0.912044	0	Inf	0.0158584	0.711294	up
ENST00000409429	ENSG00000115325	DOK1	transcript	0.875211	0	Inf	0.0158586	0.711294	up
ENST00000391796	ENSG00000105383	CD33	transcript	1.56044	0	Inf	0.0158602	0.711294	up
ENST00000638157	ENSG00000023171	GRAMD1B	transcript	0.443047	0	Inf	0.0158634	0.711294	up
ENST00000316902	ENSG00000092068	SLC7A8	transcript	0.0255795	0.765725	-4.90377	0.0159005	0.712674	down
ENST00000445726	ENSG00000164970	FAM219A	transcript	1.58043	0.092805	4.08997	0.0159103	0.712832	up
ENST00000456517	ENSG00000110422	HIPK3	transcript	6.31223	0.512042	3.62382	0.0159493	0.71401	up
ENST00000418533	ENSG00000049323	LTBP1	transcript	0	0.344715	#NAME?	0.0159675	0.714258	down
ENST00000520331	ENSG00000169131	ZNF354A	transcript	3.07706	0.080601	5.25461	0.0160161	0.715635	up
ENST00000537904	ENSG00000013306	SLC25A39	transcript	0	1.33802	#NAME?	0.016038	0.715635	down
ENST00000371187	ENSG00000162599	NFIA	transcript	0	0.637289	#NAME?	0.0160381	0.715635	down
ENST00000380033	ENSG00000177324	BEND2	transcript	0.009026	0.299046	-5.05014	0.0160602	0.716063	down
ENST00000355280	ENSG00000141503	MINK1	transcript	3.48726	25.0569	-2.84504	0.0160648	0.716063	down
ENST00000350051	ENSG00000089685	BIRC5	transcript	0.641162	0	Inf	0.0161028	0.717181	up
ENST00000414777	ENSG00000103415	HMOX2	transcript	0	0.368721	#NAME?	0.0161089	0.717181	down
ENST00000288422	ENSG00000157625	TAB3	transcript	3.99534	0.002422	10.6879	0.0161258	0.717181	up
ENST00000643502	ENSG00000100983	GSS	transcript	1.27718	0	Inf	0.0161258	0.717181	up
ENST00000526019	ENSG00000198945	L3MBTL3	transcript	0.519157	0	Inf	0.016128	0.717181	up
ENST00000594369	ENSG00000083838	ZNF446	transcript	0.082398	1.64056	-4.31544	0.0161392	0.717398	down
ENST00000550924	ENSG00000152556	PFKM	transcript	0.645524	0	Inf	0.0161757	0.718209	up
ENST00000515632	ENSG00000248405	PRR5-ARHGAP8	transcript	1.10856	0	Inf	0.016176	0.718209	up
ENST00000424270	ENSG00000137575	SDCBP	transcript	1.38525	0	Inf	0.0161765	0.718209	up
ENST00000559993	ENSG00000119661	DNAL1	transcript	0	1.15462	#NAME?	0.0162103	0.718404	down
ENST00000428524	ENSG00000168385	SEPT2	transcript	0	2.73539	#NAME?	0.0162173	0.718404	down
ENST00000394121	ENSG00000126351	THRA	transcript	0	0.78149	#NAME?	0.0162173	0.718404	down
ENST00000445065	ENSG00000142892	PIGK	transcript	0	0.408585	#NAME?	0.0162204	0.718404	down
ENST00000359139	ENSG00000100239	PPP6R2	transcript	0.76164	0.004644	7.3576	0.0162239	0.718404	up
ENST00000565087	ENSG00000101307	SIRPB1	transcript	0	0.766387	#NAME?	0.0162469	0.718404	down
ENST00000545746	ENSG00000047621	C12orf4	transcript	0.009409	0.642135	-6.09269	0.0162541	0.718404	down
ENST00000374919	ENSG00000204271	SPIN3	transcript	0.623811	0.0056215	6.79401	0.0162542	0.718404	up
ENST00000369557	ENSG00000164414	SLC35A1	transcript	0	1.02485	#NAME?	0.0162692	0.718404	down
ENST00000351660	ENSG00000095059	DHPS	transcript	0	1.55996	#NAME?	0.0162699	0.718404	down
ENST00000546344	ENSG00000105676	ARMC6	transcript	0	0.35028	#NAME?	0.0163976	0.723283	down
ENST00000377491	ENSG00000116288	PARK7	transcript	0.645634	12.3484	-4.25746	0.0164388	0.724732	down
ENST00000617123	ENSG00000278195	SSTR3	transcript	1.35058	0.075376	4.16333	0.016457	0.725028	up
ENST00000394142	ENSG00000137161	CNPY3	transcript	0.009808	2.55715	-8.02636	0.0164588	0.725028	down
ENST00000374782	ENSG00000141577	CEP131	transcript	0.001254	0.356399	-8.15081	0.0164648	0.725028	down
ENST00000374222	ENSG00000158062	UBXN11	transcript	0.992533	0.022307	5.47555	0.016499	0.72622	up
ENST00000396613	ENSG00000122694	GLIPR2	transcript	0.473476	6.1335	-3.69535	0.0165088	0.72622	down
ENST00000416849	ENSG00000059377	TBXAS1	transcript	0.0864495	1.82177	-4.39734	0.0165424	0.72622	down
ENST00000422970	ENSG00000074706	IPCEF1	transcript	0	0.535601	#NAME?	0.016544	0.72622	down
ENST00000265594	ENSG00000078070	MCCC1	transcript	0.850168	8.37634	-3.3005	0.0165485	0.72622	down
ENST00000568263	ENSG00000162066	AMDHD2	transcript	5.01526	0.304861	4.0401	0.0165699	0.72622	up
ENST00000455213	ENSG00000154328	NEIL2	transcript	0.261935	0	Inf	0.0165831	0.72622	up
ENST00000636615	ENSG00000250644	AC068580.4	transcript	0	0.748479	#NAME?	0.0165837	0.72622	down
ENST00000367230	ENSG00000112031	MTRF1L	transcript	0	0.487716	#NAME?	0.0165842	0.72622	down
ENST00000554969	ENSG00000092199	HNRNPC	transcript	3.11754	0.231424	3.7518	0.0165874	0.72622	up
ENST00000644238	ENSG00000156313	RPGR	transcript	0.713211	0	Inf	0.0166181	0.726507	up
ENST00000379279	ENSG00000089063	TMEM230	transcript	1.00323	0	Inf	0.01662	0.726507	up
ENST00000604011	ENSG00000249884	RNF103-CHMP3	transcript	0.0086225	1.70135	-7.62436	0.0166205	0.726507	down
ENST00000217133	ENSG00000101162	TUBB1	transcript	1.74442	14.4063	-3.04588	0.016657	0.727676	down
ENST00000523816	ENSG00000133943	DGLUCY	transcript	0.622904	0	Inf	0.0166707	0.727676	up
ENST00000377632	ENSG00000188687	SLC4A5	transcript	0.551616	0	Inf	0.0166707	0.727676	up
ENST00000358597	ENSG00000149187	CELF1	transcript	0.816931	0	Inf	0.016673	0.727676	up
ENST00000543283	ENSG00000107771	CCSER2	transcript	1.81311	0.127971	3.82458	0.0167328	0.730003	up
ENST00000437801	ENSG00000184613	NELL2	transcript	4.46132	0.0662695	6.07298	0.0167861	0.731767	up
ENST00000626584	ENSG00000196628	TCF4	transcript	0	0.969529	#NAME?	0.0168314	0.732268	down
ENST00000572255	ENSG00000189067	LITAF	transcript	0	3.19557	#NAME?	0.0168317	0.732268	down
ENST00000445728	ENSG00000142528	ZNF473	transcript	0	0.581306	#NAME?	0.0168351	0.732268	down
ENST00000555431	ENSG00000100554	ATP6V1D	transcript	0	1.52683	#NAME?	0.0168365	0.732268	down
ENST00000414862	ENSG00000136527	TRA2B	transcript	0.843539	0	Inf	0.0168541	0.732556	up
ENST00000357586	ENSG00000100280	AP1B1	transcript	0.540678	0.003966	7.09094	0.0168818	0.732556	up
ENST00000624873	ENSG00000266028	SRGAP2	transcript	0.346668	0	Inf	0.016893	0.732556	up
ENST00000317697	ENSG00000177981	ASB8	transcript	0.113586	6.0064	-5.72465	0.0169103	0.732556	down
ENST00000358307	ENSG00000033170	FUT8	transcript	0.0537965	1.77755	-5.04623	0.0169189	0.732556	down
ENST00000481124	ENSG00000108219	TSPAN14	transcript	1.99801	0	Inf	0.0169227	0.732556	up
ENST00000541342	ENSG00000164808	SPIDR	transcript	0.490137	0	Inf	0.0169248	0.732556	up
ENST00000442099	ENSG00000071462	BUD23	transcript	2.44473	0	Inf	0.016926	0.732556	up
ENST00000369404	ENSG00000023041	ZDHHC6	transcript	0.990399	0	Inf	0.0169261	0.732556	up
ENST00000504810	ENSG00000113013	HSPA9	transcript	2.92133	0	Inf	0.0169268	0.732556	up
ENST00000514860	ENSG00000109466	KLHL2	transcript	0	0.698498	#NAME?	0.0169782	0.734192	down
ENST00000543216	ENSG00000147050	KDM6A	transcript	0.432223	0.014936	4.85491	0.0171112	0.738772	up
ENST00000550082	ENSG00000123358	NR4A1	transcript	0.788723	0	Inf	0.0171226	0.738772	up
ENST00000639233	ENSG00000177301	KCNA2	transcript	0.304457	0	Inf	0.0171227	0.738772	up
ENST00000340004	ENSG00000115325	DOK1	transcript	0.933996	0	Inf	0.0171233	0.738772	up
ENST00000547045	ENSG00000120868	APAF1	transcript	0.0002215	0.794042	-11.8077	0.0171619	0.739872	down
ENST00000379786	ENSG00000205352	PRR13	transcript	0.193238	5.93631	-4.94112	0.0171706	0.739886	down
ENST00000360760	ENSG00000196141	SPATS2L	transcript	0.790439	0	Inf	0.0171874	0.739886	up
ENST00000296498	ENSG00000164099	PRSS12	transcript	0	0.128047	#NAME?	0.0172269	0.741098	down
ENST00000225873	ENSG00000108733	PEX12	transcript	0	0.235599	#NAME?	0.0172296	0.741098	down
ENST00000526728	ENSG00000135362	PRR5L	transcript	1.54577	0.000123	13.6174	0.0172639	0.742287	up
ENST00000536368	ENSG00000197958	RPL12	transcript	1.22113	0	Inf	0.0172795	0.742677	up
ENST00000435319	ENSG00000143337	TOR1AIP1	transcript	0.084318	9.89801	-6.87515	0.0173154	0.743937	down
ENST00000540981	ENSG00000064490	RFXANK	transcript	0.787964	0	Inf	0.0173683	0.745927	up
ENST00000304400	ENSG00000145730	PAM	transcript	0.581735	0.007531	6.27138	0.0174178	0.746957	up
ENST00000564057	ENSG00000103187	COTL1	transcript	0	0.961324	#NAME?	0.0174211	0.746957	down
ENST00000400247	ENSG00000125826	RBCK1	transcript	0	2.03285	#NAME?	0.0174213	0.746957	down
ENST00000448069	ENSG00000112855	HARS2	transcript	1.15902	0	Inf	0.0174262	0.746957	up
ENST00000548020	ENSG00000127337	YEATS4	transcript	1.4453	0	Inf	0.017432	0.746957	up
ENST00000445863	ENSG00000198836	OPA1	transcript	0.254674	3.584	-3.81485	0.0174603	0.747889	down
ENST00000416373	ENSG00000119318	RAD23B	transcript	0.216986	3.63532	-4.0664	0.0174898	0.748835	down
ENST00000610372	ENSG00000167037	SGSM1	transcript	0.034804	0.815418	-4.55021	0.0174957	0.748835	down
ENST00000372826	ENSG00000101104	PABPC1L	transcript	0.690549	0	Inf	0.017533	0.750149	up
ENST00000579248	ENSG00000265681	RPL17	transcript	121.495	17.9793	2.75649	0.0175571	0.750407	up
ENST00000553257	ENSG00000087470	DNM1L	transcript	0	0.617374	#NAME?	0.0175636	0.750407	down
ENST00000368848	ENSG00000143367	TUFT1	transcript	0	0.553606	#NAME?	0.0175656	0.750407	down
ENST00000530997	ENSG00000100503	NIN	transcript	0.248589	2.68101	-3.43094	0.0175888	0.751116	down
ENST00000395226	ENSG00000138678	GPAT3	transcript	0.899388	0.0321675	4.80527	0.0176468	0.752016	up
ENST00000484742	ENSG00000143303	RRNAD1	transcript	0.873266	0	Inf	0.0176627	0.752016	up
ENST00000580994	ENSG00000125454	SLC25A19	transcript	1.01116	0	Inf	0.0177006	0.752016	up
ENST00000381218	ENSG00000214717	ZBED1	transcript	0.554903	0	Inf	0.0177007	0.752016	up
ENST00000262300	ENSG00000127564	PKMYT1	transcript	0.727657	0	Inf	0.0177032	0.752016	up
ENST00000303617	ENSG00000148090	AUH	transcript	1.05278	0	Inf	0.0177258	0.752016	up
ENST00000437176	ENSG00000140044	JDP2	transcript	0.412197	0	Inf	0.0177288	0.752016	up
ENST00000599701	ENSG00000104870	FCGRT	transcript	2.69817	0	Inf	0.017731	0.752016	up
ENST00000524850	ENSG00000064687	ABCA7	transcript	2.70533	0	Inf	0.0177314	0.752016	up
ENST00000479230	ENSG00000163938	GNL3	transcript	0	1.5418	#NAME?	0.0177346	0.752016	down
ENST00000612287	ENSG00000138658	ZGRF1	transcript	0	0.733695	#NAME?	0.0177525	0.752016	down
ENST00000375802	ENSG00000099246	RAB18	transcript	2.6598	0	Inf	0.0177537	0.752016	up
ENST00000512560	ENSG00000177034	MTX3	transcript	0	0.331574	#NAME?	0.0177542	0.752016	down
ENST00000427987	ENSG00000145020	AMT	transcript	0	0.96922	#NAME?	0.0177544	0.752016	down
ENST00000383045	ENSG00000184702	SEPT5	transcript	0	0.999328	#NAME?	0.0177554	0.752016	down
ENST00000359073	ENSG00000146576	C7orf26	transcript	0	0.903397	#NAME?	0.0177562	0.752016	down
ENST00000613570	ENSG00000116161	CACYBP	transcript	0.118851	1.57138	-3.72481	0.0177714	0.752377	down
ENST00000442506	ENSG00000151779	NBAS	transcript	0	0.375314	#NAME?	0.0178253	0.753803	down
ENST00000418635	ENSG00000112033	PPARD	transcript	0	0.476878	#NAME?	0.0178268	0.753803	down
ENST00000221576	ENSG00000104979	C19orf53	transcript	0	3.25405	#NAME?	0.01783	0.753803	down
ENST00000265801	ENSG00000061337	LZTS1	transcript	0	0.302581	#NAME?	0.0178318	0.753803	down
ENST00000338099	ENSG00000180917	CMTR2	transcript	0.211297	2.06985	-3.29218	0.0178772	0.754876	down
ENST00000433749	ENSG00000036549	AC118549.1	transcript	0	0.994036	#NAME?	0.0179845	0.757264	down
ENST00000443698	ENSG00000096872	IFT74	transcript	0.748557	0	Inf	0.018027	0.757264	up
ENST00000644043	ENSG00000103197	TSC2	transcript	0	0.286905	#NAME?	0.0180512	0.757264	down
ENST00000561867	ENSG00000117616	RSRP1	transcript	0	3.2879	#NAME?	0.0180515	0.757264	down
ENST00000569481	ENSG00000149932	TMEM219	transcript	3.4915	0	Inf	0.0180521	0.757264	up
ENST00000508421	ENSG00000123219	CENPK	transcript	0.977706	0	Inf	0.0180524	0.757264	up
ENST00000455322	ENSG00000074054	CLASP1	transcript	0.272973	0	Inf	0.018053	0.757264	up
ENST00000506339	ENSG00000197451	HNRNPAB	transcript	0	0.899628	#NAME?	0.0180561	0.757264	down
ENST00000510188	ENSG00000082074	FYB1	transcript	0	1.56885	#NAME?	0.0180592	0.757264	down
ENST00000442018	ENSG00000183337	BCOR	transcript	0	0.712781	#NAME?	0.0180604	0.757264	down
ENST00000374622	ENSG00000181704	YIPF6	transcript	0	0.256114	#NAME?	0.0180648	0.757264	down
ENST00000339145	ENSG00000126709	IFI6	transcript	0.797312	0	Inf	0.0180655	0.757264	up
ENST00000341012	ENSG00000130714	POMT1	transcript	0	0.540319	#NAME?	0.0180677	0.757264	down
ENST00000513765	ENSG00000072518	MARK2	transcript	0.1952	3.17231	-4.02251	0.0180845	0.757685	down
ENST00000641449	ENSG00000141194	OR4D1	transcript	0	0.330935	#NAME?	0.0181675	0.760618	down
ENST00000522700	ENSG00000128694	OSGEPL1	transcript	0	0.911859	#NAME?	0.0181713	0.760618	down
ENST00000371826	ENSG00000119922	IFIT2	transcript	0.0798985	1.19087	-3.89771	0.0181957	0.761215	down
ENST00000503079	ENSG00000172062	SMN1	transcript	0.004651	0.81101	-7.44603	0.0182622	0.762629	down
ENST00000541030	ENSG00000242866	STRC	transcript	0.117809	0	Inf	0.0182835	0.762629	up
ENST00000520969	ENSG00000161013	MGAT4B	transcript	1.39833	0	Inf	0.0183101	0.762629	up
ENST00000415922	ENSG00000181315	ZNF322	transcript	0.562547	0.000236	11.219	0.0183103	0.762629	up
ENST00000431969	ENSG00000143178	TBX19	transcript	0.643516	0	Inf	0.0183109	0.762629	up
ENST00000472745	ENSG00000133142	TCEAL4	transcript	0	0.464123	#NAME?	0.0183224	0.762629	down
ENST00000329331	ENSG00000183576	SETD3	transcript	0.003176	2.1247	-9.38583	0.0183239	0.762629	down
ENST00000537758	ENSG00000102312	PORCN	transcript	0	1.12356	#NAME?	0.0183658	0.762629	down
ENST00000349693	ENSG00000104356	POP1	transcript	0	0.474988	#NAME?	0.0183674	0.762629	down
ENST00000505206	ENSG00000109680	TBC1D19	transcript	0	1.99427	#NAME?	0.0183685	0.762629	down
ENST00000572392	ENSG00000185359	HGS	transcript	1.83619	0	Inf	0.0183723	0.762629	up
ENST00000566497	ENSG00000140545	MFGE8	transcript	0.89947	0	Inf	0.0183763	0.762629	up
ENST00000540744	ENSG00000213020	ZNF611	transcript	0.343902	0	Inf	0.0183805	0.762629	up
ENST00000600990	ENSG00000119574	ZBTB45	transcript	0.740037	0	Inf	0.0183818	0.762629	up
ENST00000598779	ENSG00000105245	NUMBL	transcript	0.708604	0	Inf	0.018382	0.762629	up
ENST00000441497	ENSG00000114346	ECT2	transcript	0.53901	0	Inf	0.0183846	0.762629	up
ENST00000434382	ENSG00000196715	VKORC1L1	transcript	0	1.03112	#NAME?	0.0184924	0.766535	down
ENST00000421589	ENSG00000131236	CAP1	transcript	1.02193	0	Inf	0.0185367	0.768091	up
ENST00000465709	ENSG00000157303	SUSD3	transcript	1.31476	0	Inf	0.0185662	0.768749	up
ENST00000581373	ENSG00000265681	RPL17	transcript	0.652316	13.7606	-4.39882	0.0186063	0.769844	down
ENST00000589469	ENSG00000131467	PSME3	transcript	0	2.08067	#NAME?	0.0186446	0.769994	down
ENST00000537883	ENSG00000112531	QKI	transcript	0	0.545095	#NAME?	0.0186464	0.769994	down
ENST00000381604	ENSG00000015171	ZMYND11	transcript	0	0.374194	#NAME?	0.0186487	0.769994	down
ENST00000549027	ENSG00000184613	NELL2	transcript	0.515065	0	Inf	0.0186548	0.769994	up
ENST00000339313	ENSG00000142512	SIGLEC10	transcript	4.68026	0.131552	5.15288	0.0186575	0.769994	up
ENST00000442141	ENSG00000138018	SELENOI	transcript	3.13636	0	Inf	0.0186576	0.769994	up
ENST00000628067	ENSG00000177542	SLC25A22	transcript	1.03733	0.0004165	11.2823	0.0186681	0.770147	up
ENST00000395802	ENSG00000124164	VAPB	transcript	0.819153	0	Inf	0.0187002	0.77034	up
ENST00000511257	ENSG00000183323	CCDC125	transcript	0.862676	0	Inf	0.0187004	0.77034	up
ENST00000448764	ENSG00000087087	SRRT	transcript	0.937566	0	Inf	0.0187024	0.77034	up
ENST00000556511	ENSG00000140153	WDR20	transcript	0.708599	0	Inf	0.0187029	0.77034	up
ENST00000606977	ENSG00000182923	CEP63	transcript	0.536348	0	Inf	0.0187096	0.77034	up
ENST00000511831	ENSG00000137207	YIPF3	transcript	0.368766	6.96067	-4.23845	0.0187519	0.771635	down
ENST00000369748	ENSG00000064886	CHI3L2	transcript	1.79803	0.055871	5.00817	0.0187787	0.772455	up
ENST00000438510	ENSG00000242574	HLA-DMB	transcript	0.866101	0	Inf	0.0188181	0.773511	up
ENST00000334463	ENSG00000186871	ERCC6L	transcript	0.15404	0	Inf	0.0188407	0.773679	up
ENST00000644458	ENSG00000197283	SYNGAP1	transcript	0	0.39091	#NAME?	0.0188427	0.773679	down
ENST00000442275	ENSG00000136167	LCP1	transcript	0.396324	6.78885	-4.09841	0.0188717	0.774591	down
ENST00000409472	ENSG00000227500	SCAMP4	transcript	0.457415	0	Inf	0.0189403	0.777125	up
ENST00000530205	ENSG00000196323	ZBTB44	transcript	0	0.690527	#NAME?	0.0189722	0.777865	down
ENST00000412720	ENSG00000139197	PEX5	transcript	0.707891	0	Inf	0.0189946	0.7783	up
ENST00000446223	ENSG00000130810	PPAN	transcript	1.75928	0	Inf	0.0189965	0.7783	up
ENST00000547191	ENSG00000089157	RPLP0	transcript	2.27563	0	Inf	0.0190207	0.778725	up
ENST00000253669	ENSG00000131351	HAUS8	transcript	0.011353	0.805431	-6.14862	0.0190801	0.780591	down
[truncated: 1,127 more rows]

## Sheet: lncRNA
Differentially expressed lncRNAs in health controls (HCs) vs. elite controllers (ECs)
transcript_id	gene_id	gene_name	feature_id	ECs_FPKM	HCs_FPKM	log2(foldchange)	pvalue	qvalue	regulation
LNC_000090	XLOC_000578	Novel lncRNA	transcript	0	82.1354	#NAME?	9.3402e-09	5.55683e-05	down
ENST00000627246.2	ENSG00000281106.2	LINC00282	transcript	0	2.9976	#NAME?	9.92216e-07	0.00113291	down
LNC_004552	XLOC_078968	Novel lncRNA	transcript	1.05346	0	Inf	1.87903e-06	0.00189644	up
LNC_002362	XLOC_038496	Novel lncRNA	transcript	0	1.1383	#NAME?	1.27465e-05	0.00883953	down
LNC_000325	XLOC_004131	Novel lncRNA	transcript	2.5008	0	Inf	1.76206e-05	0.011648	up
LNC_000413	XLOC_005348	Novel lncRNA	transcript	1.40827	0	Inf	4.12954e-05	0.0220187	up
LNC_000386	XLOC_005348	Novel lncRNA	transcript	0	3.60494	#NAME?	4.54072e-05	0.0236844	down
LNC_001012	XLOC_014635	Novel lncRNA	transcript	0	10.8785	#NAME?	4.65643e-05	0.0241447	down
LNC_009211	XLOC_174576	Novel lncRNA	transcript	1.04049	0	Inf	6.95658e-05	0.0318009	up
LNC_008018	XLOC_150668	Novel lncRNA	transcript	0	1.12292	#NAME?	0.000132727	0.0512053	down
LNC_006283	XLOC_112538	Novel lncRNA	transcript	0	0.67162	#NAME?	0.000169827	0.059932	down
LNC_004505	XLOC_078217	Novel lncRNA	transcript	0	1.15678	#NAME?	0.000257488	0.0834396	down
LNC_007224	XLOC_133117	Novel lncRNA	transcript	0	0.837963	#NAME?	0.000258125	0.0834396	down
LNC_000022	XLOC_000292	Novel lncRNA	transcript	42.6439	1.04039	5.35714	0.000258944	0.0834396	up
LNC_000060	XLOC_000577	Novel lncRNA	transcript	9.78645	0.255709	5.25821	0.000276182	0.0862404	up
ENST00000539446.5	ENSG00000255857.5	PXN-AS1	transcript	0	3.74721	#NAME?	0.000277691	0.0864728	down
LNC_000069	XLOC_000577	Novel lncRNA	transcript	3.94171	0.0377185	6.7074	0.000281171	0.0868387	up
LNC_008207	XLOC_155398	Novel lncRNA	transcript	0	1.90012	#NAME?	0.000306431	0.0920742	down
ENST00000612515.4	ENSG00000239665.8	RP11-295P9.3	transcript	3.34106	0	Inf	0.00038473	0.105855	up
LNC_003516	XLOC_059818	Novel lncRNA	transcript	0.939741	0	Inf	0.000435675	0.114264	up
LNC_007225	XLOC_133117	Novel lncRNA	transcript	0.562989	0	Inf	0.000457698	0.118094	up
LNC_001740	XLOC_026266	Novel lncRNA	transcript	0	0.389356	#NAME?	0.000486504	0.121381	down
ENST00000447725.2	ENSG00000224870.6	RP4-758J18.2	transcript	1.44662	0	Inf	0.000514379	0.123975	up
LNC_009764	XLOC_189436	Novel lncRNA	transcript	0.478384	0	Inf	0.000602155	0.135118	up
LNC_000064	XLOC_000577	Novel lncRNA	transcript	0	13.1404	#NAME?	0.000608888	0.135578	down
LNC_006013	XLOC_107654	Novel lncRNA	transcript	0.002206	0.671996	-8.25088	0.000792597	0.155101	down
LNC_009416	XLOC_180363	Novel lncRNA	transcript	0.596456	0	Inf	0.000838793	0.158687	up
LNC_000071	XLOC_000577	Novel lncRNA	transcript	10.6488	0	Inf	0.000875104	0.159908	up
ENST00000575331.1	ENSG00000272884.1	RP11-104H15.10	transcript	0	0.376416	#NAME?	0.000909032	0.162813	down
LNC_000074	XLOC_000577	Novel lncRNA	transcript	0	13.544	#NAME?	0.000914688	0.162883	down
LNC_001059	XLOC_014635	Novel lncRNA	transcript	0	1.34796	#NAME?	0.00096517	0.167652	down
LNC_007242	XLOC_133346	Novel lncRNA	transcript	0	2.71491	#NAME?	0.001054	0.173588	down
LNC_003071	XLOC_050864	Novel lncRNA	transcript	0.68145	0	Inf	0.00113592	0.179333	up
LNC_000118	XLOC_001016	Novel lncRNA	transcript	0.392952	0	Inf	0.00120335	0.183816	up
LNC_002052	XLOC_032340	Novel lncRNA	transcript	0	0.546331	#NAME?	0.00122418	0.185744	down
LNC_004140	XLOC_071718	Novel lncRNA	transcript	1.37078	0	Inf	0.00124073	0.186958	up
LNC_007826	XLOC_147039	Novel lncRNA	transcript	0	0.900172	#NAME?	0.00134066	0.197324	down
LNC_009826	XLOC_190967	Novel lncRNA	transcript	0	0.516806	#NAME?	0.00139768	0.201519	down
LNC_007361	XLOC_135908	Novel lncRNA	transcript	0	1.00536	#NAME?	0.00141012	0.202024	down
LNC_001078	XLOC_014635	Novel lncRNA	transcript	0.687529	0	Inf	0.00149013	0.209244	up
LNC_006680	XLOC_121589	Novel lncRNA	transcript	1.06603	0	Inf	0.00154038	0.21373	up
LNC_005966	XLOC_106851	Novel lncRNA	transcript	2.01406	0	Inf	0.0015967	0.217455	up
LNC_004592	XLOC_079722	Novel lncRNA	transcript	0.781299	0.0084725	6.52694	0.00164139	0.221672	up
ENST00000608184.1	ENSG00000247708.7	STX18-AS1	transcript	0.506051	0	Inf	0.00167797	0.224466	up
LNC_006886	XLOC_125809	Novel lncRNA	transcript	1.28495	0	Inf	0.00173063	0.228536	up
LNC_000075	XLOC_000577	Novel lncRNA	transcript	0	13.3505	#NAME?	0.00173919	0.228865	down
LNC_001142	XLOC_014829	Novel lncRNA	transcript	0	1.8024	#NAME?	0.00180183	0.23384	down
LNC_004400	XLOC_076431	Novel lncRNA	transcript	1.4516	0	Inf	0.00187447	0.239618	up
LNC_000055	XLOC_000571	Novel lncRNA	transcript	2.74543	0	Inf	0.00190604	0.240731	up
LNC_007645	XLOC_142349	Novel lncRNA	transcript	0	11.8829	#NAME?	0.00194036	0.241561	down
LNC_000793	XLOC_011276	Novel lncRNA	transcript	0.650131	0	Inf	0.00198641	0.245133	up
LNC_001221	XLOC_015597	Novel lncRNA	transcript	0.67042	0	Inf	0.00208374	0.25031	up
LNC_000288	XLOC_003548	Novel lncRNA	transcript	0	0.426352	#NAME?	0.00266096	0.290057	down
LNC_000081	XLOC_000577	Novel lncRNA	transcript	0	7.39293	#NAME?	0.00274613	0.295917	down
LNC_003811	XLOC_065371	Novel lncRNA	transcript	0	1.16398	#NAME?	0.00286131	0.303412	down
LNC_002221	XLOC_035709	Novel lncRNA	transcript	0	0.530362	#NAME?	0.00303444	0.311996	down
ENST00000607005.5	ENSG00000225138.7	CTD-2228K2.7	transcript	2.87126	0	Inf	0.00326146	0.326255	up
LNC_003518	XLOC_059818	Novel lncRNA	transcript	0.630083	0	Inf	0.00333	0.33019	up
LNC_009626	XLOC_186731	Novel lncRNA	transcript	0.413616	0.005935	6.1229	0.00339076	0.334775	up
LNC_000636	XLOC_008370	Novel lncRNA	transcript	0	0.681599	#NAME?	0.00342501	0.336342	down
LNC_002886	XLOC_047239	Novel lncRNA	transcript	0.009728	4.02926	-8.69416	0.00355811	0.344775	down
LNC_000509	XLOC_006125	Novel lncRNA	transcript	4.23263	0	Inf	0.00357763	0.345384	up
LNC_007929	XLOC_149245	Novel lncRNA	transcript	0	7.55404	#NAME?	0.00385029	0.358796	down
LNC_007483	XLOC_138794	Novel lncRNA	transcript	0.214721	0	Inf	0.00394867	0.363994	up
LNC_001956	XLOC_030610	Novel lncRNA	transcript	0.0151945	1.02928	-6.08194	0.00422381	0.373592	down
LNC_004524	XLOC_078627	Novel lncRNA	transcript	0	0.554117	#NAME?	0.00423633	0.374114	down
ENST00000643101	ENSG00000253438	PCAT1	transcript	0.028144	1.61231	-5.84016	0.00446462	0.384658	down
LNC_000644	XLOC_008504	Novel lncRNA	transcript	0.725054	0	Inf	0.00474597	0.395631	up
LNC_002569	XLOC_042118	Novel lncRNA	transcript	0	0.824619	#NAME?	0.0047902	0.396975	down
LNC_001159	XLOC_015066	Novel lncRNA	transcript	0	0.487135	#NAME?	0.00491456	0.404612	down
LNC_004344	XLOC_075357	Novel lncRNA	transcript	0.033107	26.2858	-9.63293	0.00492712	0.405351	down
LNC_001743	XLOC_026273	Novel lncRNA	transcript	0.463658	0	Inf	0.00515039	0.411597	up
LNC_004941	XLOC_084737	Novel lncRNA	transcript	1.35017	0	Inf	0.00544408	0.423539	up
LNC_008877	XLOC_167961	Novel lncRNA	transcript	0.509123	0	Inf	0.00549259	0.424673	up
ENST00000445466.2	ENSG00000229619.3	MBNL1-AS1	transcript	1.21591	0	Inf	0.00559024	0.429578	up
ENST00000416261.1	ENSG00000238121.5	LINC00426	transcript	1.77844	0	Inf	0.00566472	0.431087	up
ENST00000570344.1	ENSG00000224870.6	RP4-758J18.2	transcript	1.8837	0	Inf	0.0058231	0.439114	up
LNC_010334	XLOC_204476	Novel lncRNA	transcript	0.286569	0	Inf	0.00612541	0.445849	up
LNC_006883	XLOC_125767	Novel lncRNA	transcript	1.21467	0.005887	7.68882	0.0061566	0.447703	up
LNC_000079	XLOC_000577	Novel lncRNA	transcript	0.023585	7.76679	-8.3633	0.00631443	0.453187	down
LNC_003544	XLOC_059988	Novel lncRNA	transcript	0	0.393927	#NAME?	0.00661126	0.462174	down
LNC_008091	XLOC_152046	Novel lncRNA	transcript	0	0.472988	#NAME?	0.00675093	0.468439	down
LNC_006065	XLOC_109053	Novel lncRNA	transcript	0	0.636374	#NAME?	0.00677604	0.468492	down
ENST00000625218.1	ENSG00000281649.1	EBLN3	transcript	0	3.18705	#NAME?	0.00690978	0.475202	down
LNC_004904	XLOC_084165	Novel lncRNA	transcript	0.531002	0	Inf	0.00723534	0.486247	up
LNC_009709	XLOC_188774	Novel lncRNA	transcript	0.007206	0.443302	-5.94295	0.00742635	0.492201	down
LNC_004015	XLOC_069106	Novel lncRNA	transcript	1.02701	0	Inf	0.00775254	0.501911	up
LNC_001009	XLOC_014635	Novel lncRNA	transcript	0.0059775	0.452875	-6.24343	0.00778323	0.501961	down
LNC_003818	XLOC_065558	Novel lncRNA	transcript	0.762065	0	Inf	0.00814306	0.514265	up
LNC_005559	XLOC_097887	Novel lncRNA	transcript	1.24145	0.017071	6.18434	0.00823756	0.517885	up
LNC_001624	XLOC_024267	Novel lncRNA	transcript	0.419449	0	Inf	0.00830591	0.521602	up
LNC_000062	XLOC_000577	Novel lncRNA	transcript	1.86289	0	Inf	0.00837528	0.524501	up
LNC_001615	XLOC_024022	Novel lncRNA	transcript	0.566664	0	Inf	0.00847122	0.525854	up
LNC_006295	XLOC_112539	Novel lncRNA	transcript	0	1.79503	#NAME?	0.00855232	0.527827	down
ENST00000491009.5	ENSG00000175061.17	LRRC75A-AS1	transcript	1.37206	28.0901	-4.35565	0.0085842	0.528706	down
LNC_002560	XLOC_041795	Novel lncRNA	transcript	0.925812	0	Inf	0.0086823	0.531077	up
LNC_003625	XLOC_060889	Novel lncRNA	transcript	0.417095	0	Inf	0.00888802	0.537616	up
LNC_010419	XLOC_205767	Novel lncRNA	transcript	0.586588	0	Inf	0.00889784	0.537616	up
ENST00000443587.5	ENSG00000231607.8	DLEU2	transcript	1.35261	0	Inf	0.00911097	0.54549	up
LNC_000020	XLOC_000292	Novel lncRNA	transcript	4.8639	0	Inf	0.00912087	0.545794	up
LNC_008343	XLOC_157106	Novel lncRNA	transcript	0.256568	0	Inf	0.00920819	0.548262	up
LNC_003506	XLOC_059426	Novel lncRNA	transcript	0.504695	0	Inf	0.00949438	0.554528	up
LNC_007922	XLOC_149245	Novel lncRNA	transcript	0	1.13624	#NAME?	0.00955514	0.55589	down
LNC_000041	XLOC_000375	Novel lncRNA	transcript	0	3.39529	#NAME?	0.00956164	0.555982	down
LNC_005146	XLOC_088782	Novel lncRNA	transcript	0.563727	0	Inf	0.00958095	0.556246	up
LNC_008954	XLOC_169942	Novel lncRNA	transcript	0	0.722375	#NAME?	0.00964287	0.557664	down
ENST00000602483.5	ENSG00000269893.6	SNHG8	transcript	0	2.62662	#NAME?	0.00966951	0.557664	down
LNC_003953	XLOC_068335	Novel lncRNA	transcript	0.444288	0	Inf	0.00971308	0.558751	up
LNC_002222	XLOC_035709	Novel lncRNA	transcript	0.571835	0	Inf	0.00972221	0.558775	up
LNC_003872	XLOC_066643	Novel lncRNA	transcript	1.42216	0.087956	4.01515	0.00989313	0.565301	up
LNC_006667	XLOC_121256	Novel lncRNA	transcript	0.768683	0	Inf	0.00990504	0.565301	up
ENST00000405369.3	ENSG00000218357.3	LL22NC03-75H12.2	transcript	0	0.803753	#NAME?	0.00990689	0.565301	down
LNC_008972	XLOC_170279	Novel lncRNA	transcript	0	0.792454	#NAME?	0.0102871	0.574119	down
LNC_002559	XLOC_041795	Novel lncRNA	transcript	0	0.888111	#NAME?	0.0103103	0.574119	down
LNC_000383	XLOC_005348	Novel lncRNA	transcript	0.166084	2.21164	-3.73513	0.0103958	0.576459	down
LNC_010088	XLOC_198211	Novel lncRNA	transcript	0.740217	0	Inf	0.0104665	0.576903	up
LNC_001120	XLOC_014664	Novel lncRNA	transcript	0	1.82522	#NAME?	0.0104675	0.576903	down
LNC_000555	XLOC_006617	Novel lncRNA	transcript	0.0136085	1.24894	-6.52005	0.0106151	0.581634	down
LNC_002341	XLOC_038304	Novel lncRNA	transcript	0	0.263381	#NAME?	0.0107427	0.586353	down
LNC_008280	XLOC_156463	Novel lncRNA	transcript	0	0.557057	#NAME?	0.0107615	0.586519	down
LNC_000037	XLOC_000373	Novel lncRNA	transcript	0.611367	0	Inf	0.0111123	0.597223	up
LNC_001320	XLOC_017262	Novel lncRNA	transcript	0	0.418567	#NAME?	0.0111703	0.598989	down
LNC_010009	XLOC_196050	Novel lncRNA	transcript	0.725742	0	Inf	0.0112149	0.599538	up
LNC_005574	XLOC_098295	Novel lncRNA	transcript	0.223023	0	Inf	0.0113174	0.601608	up
LNC_008771	XLOC_165615	Novel lncRNA	transcript	1.36139	0.127495	3.41657	0.0113955	0.604185	up
LNC_010423	XLOC_205909	Novel lncRNA	transcript	0.642953	0	Inf	0.0114421	0.604997	up
LNC_000161	XLOC_001616	Novel lncRNA	transcript	0.276196	0	Inf	0.0117928	0.614242	up
LNC_006979	XLOC_128448	Novel lncRNA	transcript	0.915739	0	Inf	0.0118411	0.615967	up
LNC_006985	XLOC_128487	Novel lncRNA	transcript	0	0.710353	#NAME?	0.0120077	0.618275	down
LNC_006063	XLOC_109053	Novel lncRNA	transcript	1.29747	0	Inf	0.0120119	0.618275	up
LNC_004942	XLOC_084737	Novel lncRNA	transcript	0.917808	0	Inf	0.0120277	0.618275	up
LNC_010108	XLOC_198577	Novel lncRNA	transcript	0.477293	0	Inf	0.0123205	0.628599	up
LNC_007990	XLOC_149962	Novel lncRNA	transcript	0.990631	0	Inf	0.0123545	0.629068	up
LNC_004650	XLOC_081494	Novel lncRNA	transcript	0.459529	0.0054355	6.4016	0.0124365	0.631249	up
LNC_005554	XLOC_097768	Novel lncRNA	transcript	1.24711	0.0241305	5.69158	0.0124814	0.632963	up
LNC_008509	XLOC_160523	Novel lncRNA	transcript	0.451454	0	Inf	0.0127665	0.640739	up
ENST00000606288.1	ENSG00000225138.7	CTD-2228K2.7	transcript	1.23038	0	Inf	0.0129162	0.64422	up
LNC_009638	XLOC_187283	Novel lncRNA	transcript	0	0.697451	#NAME?	0.0129335	0.64422	down
LNC_006437	XLOC_116078	Novel lncRNA	transcript	0.372206	0	Inf	0.0131677	0.649449	up
ENST00000419300.3	ENSG00000204054.12	LINC00963	transcript	1.98581	0.220501	3.17087	0.0132265	0.650043	up
ENST00000534123.5	ENSG00000255036.6	RP11-23J9.4	transcript	0	0.305746	#NAME?	0.0134463	0.656279	down
LNC_010081	XLOC_198112	Novel lncRNA	transcript	0.388549	0	Inf	0.0134847	0.656713	up
LNC_010284	XLOC_203033	Novel lncRNA	transcript	0.457163	0	Inf	0.0134848	0.656713	up
LNC_006787	XLOC_124119	Novel lncRNA	transcript	0.961247	0.0262485	5.1946	0.013536	0.658102	up
ENST00000606107.5	ENSG00000225138.7	CTD-2228K2.7	transcript	0.756795	0	Inf	0.0141404	0.673514	up
LNC_003599	XLOC_060613	Novel lncRNA	transcript	0.802002	0	Inf	0.0145072	0.681563	up
ENST00000582008.5	ENSG00000263753.6	LINC00667	transcript	0.007941	1.35346	-7.41311	0.0146157	0.68402	down
LNC_000618	XLOC_008150	Novel lncRNA	transcript	0	0.832156	#NAME?	0.0146335	0.68402	down
LNC_007001	XLOC_128769	Novel lncRNA	transcript	0	0.263308	#NAME?	0.0147455	0.685654	down
ENST00000619625.4	ENSG00000225484.6	NUTM2B-AS1	transcript	0.238434	2.33538	-3.29199	0.0147457	0.685654	down
LNC_008277	XLOC_156462	Novel lncRNA	transcript	2.56274	0.040037	6.00021	0.0148585	0.688915	up
LNC_008117	XLOC_152840	Novel lncRNA	transcript	0.939117	0	Inf	0.0151164	0.695453	up
LNC_000392	XLOC_005348	Novel lncRNA	transcript	0.015808	1.60665	-6.66725	0.0151283	0.695486	down
LNC_002210	XLOC_035263	Novel lncRNA	transcript	0	0.398559	#NAME?	0.0156156	0.706064	down
ENST00000555937.1	ENSG00000258964.1	RP11-618G20.1	transcript	0	0.918433	#NAME?	0.0158278	0.711294	down
LNC_008227	XLOC_155653	Novel lncRNA	transcript	3.37661	0	Inf	0.0158493	0.711294	up
LNC_003843	XLOC_065991	Novel lncRNA	transcript	0.851163	0	Inf	0.015861	0.711294	up
LNC_002827	XLOC_046654	Novel lncRNA	transcript	0.388829	0.0026945	7.17298	0.0159298	0.713419	up
LNC_007797	XLOC_146360	Novel lncRNA	transcript	0.540612	0.007453	6.18063	0.0159576	0.714099	up
LNC_007306	XLOC_134187	Novel lncRNA	transcript	0.013667	0.600456	-5.45729	0.0160036	0.71559	down
LNC_004649	XLOC_081494	Novel lncRNA	transcript	0	0.331903	#NAME?	0.0160345	0.715635	down
LNC_005204	XLOC_089603	Novel lncRNA	transcript	0	0.432393	#NAME?	0.0162132	0.718404	down
LNC_007226	XLOC_133117	Novel lncRNA	transcript	0.0021615	0.719883	-8.37959	0.0162659	0.718404	down
LNC_004343	XLOC_075357	Novel lncRNA	transcript	5.15504	0	Inf	0.0163996	0.723283	up
LNC_001950	XLOC_030484	Novel lncRNA	transcript	0	0.29711	#NAME?	0.016582	0.72622	down
LNC_000040	XLOC_000375	Novel lncRNA	transcript	1.50138	0	Inf	0.0166153	0.726507	up
LNC_004703	XLOC_082427	Novel lncRNA	transcript	1.17356	0	Inf	0.0167621	0.730999	up
LNC_000880	XLOC_012719	Novel lncRNA	transcript	0.0152305	0.403815	-4.72866	0.0168045	0.732268	down
LNC_001076	XLOC_014635	Novel lncRNA	transcript	0	0.944783	#NAME?	0.0168301	0.732268	down
LNC_000451	XLOC_005625	Novel lncRNA	transcript	7.98494	0.921227	3.11565	0.0171884	0.739886	up
LNC_000635	XLOC_008370	Novel lncRNA	transcript	0.201007	0	Inf	0.0176965	0.752016	up
LNC_000012	XLOC_000254	Novel lncRNA	transcript	1.10113	0	Inf	0.0176985	0.752016	up
LNC_000102	XLOC_000875	Novel lncRNA	transcript	0.327349	0	Inf	0.0177287	0.752016	up
LNC_004013	XLOC_069100	Novel lncRNA	transcript	0.477492	0	Inf	0.0177357	0.752016	up
LNC_007084	XLOC_130259	Novel lncRNA	transcript	0.005029	1.06327	-7.72402	0.0179064	0.755543	down
LNC_007133	XLOC_130762	Novel lncRNA	transcript	1.30219	11.7385	-3.17223	0.018035	0.757264	down
ENST00000606665.5	ENSG00000271858.5	CYB561D2	transcript	0.651699	0	Inf	0.0188153	0.773511	up
LNC_003174	XLOC_052940	Novel lncRNA	transcript	0	0.390223	#NAME?	0.0193514	0.787985	down
LNC_006169	XLOC_110165	Novel lncRNA	transcript	0.613343	0.0134715	5.50871	0.0199402	0.802466	up
LNC_006585	XLOC_119664	Novel lncRNA	transcript	0.363208	0	Inf	0.0202548	0.808689	up
LNC_008305	XLOC_156705	Novel lncRNA	transcript	0.641373	0.012515	5.67943	0.0209287	0.82401	up
LNC_003270	XLOC_055265	Novel lncRNA	transcript	0	0.524761	#NAME?	0.0210106	0.824958	down
LNC_004381	XLOC_076040	Novel lncRNA	transcript	0.651616	0	Inf	0.0212522	0.827346	up
ENST00000451706.3	ENSG00000227165.7	WDR11-AS1	transcript	0	0.502286	#NAME?	0.0212683	0.827346	down
LNC_004636	XLOC_080835	Novel lncRNA	transcript	0.429275	0	Inf	0.0212769	0.827346	up
ENST00000579700.1	ENSG00000265479.5	DTX2P1-UPK3BP1-PMS2P11	transcript	7.31359	0.826887	3.14482	0.021489	0.831591	up
LNC_003051	XLOC_050351	Novel lncRNA	transcript	0	0.413801	#NAME?	0.0217942	0.838235	down
LNC_008580	XLOC_161408	Novel lncRNA	transcript	0.0297525	1.54092	-5.69464	0.0221758	0.84813	down
LNC_008327	XLOC_156883	Novel lncRNA	transcript	0.415546	0	Inf	0.0221894	0.84813	up
LNC_010278	XLOC_202922	Novel lncRNA	transcript	0	0.61009	#NAME?	0.0222535	0.849256	down
LNC_007415	XLOC_137683	Novel lncRNA	transcript	0	0.274283	#NAME?	0.0223197	0.850706	down
LNC_002223	XLOC_035709	Novel lncRNA	transcript	0	0.333283	#NAME?	0.0223244	0.850706	down
LNC_006170	XLOC_110165	Novel lncRNA	transcript	0.267467	0	Inf	0.022327	0.850706	up
LNC_008979	XLOC_170423	Novel lncRNA	transcript	0.282275	0	Inf	0.0225161	0.854689	up
LNC_002436	XLOC_039567	Novel lncRNA	transcript	0.746085	0	Inf	0.0226745	0.858079	up
LNC_002298	XLOC_037139	Novel lncRNA	transcript	0	0.686376	#NAME?	0.0229391	0.864916	down
LNC_010264	XLOC_202657	Novel lncRNA	transcript	0	0.431509	#NAME?	0.0229914	0.864916	down
LNC_001693	XLOC_025540	Novel lncRNA	transcript	0.941816	0	Inf	0.0230997	0.866548	up
LNC_001156	XLOC_015037	Novel lncRNA	transcript	0.521071	0	Inf	0.0231061	0.866548	up
LNC_007241	XLOC_133345	Novel lncRNA	transcript	0	2.19159	#NAME?	0.0231677	0.867261	down
LNC_002194	XLOC_034974	Novel lncRNA	transcript	0	0.364583	#NAME?	0.0231698	0.867261	down
LNC_010285	XLOC_203138	Novel lncRNA	transcript	1.11081	0	Inf	0.0231963	0.867261	up
LNC_007544	XLOC_139662	Novel lncRNA	transcript	0.284988	0	Inf	0.023198	0.867261	up
LNC_009585	XLOC_185704	Novel lncRNA	transcript	0.338528	0	Inf	0.0232815	0.869692	up
LNC_001093	XLOC_014635	Novel lncRNA	transcript	0	0.902991	#NAME?	0.0233505	0.871408	down
ENST00000561202.1	ENSG00000259476.1	RP11-50C13.2	transcript	0	0.329934	#NAME?	0.0237354	0.878232	down
LNC_004559	XLOC_079059	Novel lncRNA	transcript	0.359029	0	Inf	0.0237969	0.87907	up
LNC_004175	XLOC_072251	Novel lncRNA	transcript	0	0.770591	#NAME?	0.0238278	0.879349	down
LNC_002284	XLOC_036894	Novel lncRNA	transcript	0.545914	0.0323005	4.07904	0.0238571	0.880142	up
ENST00000631093.1	ENSG00000281649.1	EBLN3	transcript	0.938585	0	Inf	0.0241464	0.8868	up
LNC_002520	XLOC_041303	Novel lncRNA	transcript	0.934465	0.017329	5.75288	0.024264	0.889111	up
LNC_004030	XLOC_069275	Novel lncRNA	transcript	0.704751	0	Inf	0.0242863	0.889591	up
LNC_005719	XLOC_101548	Novel lncRNA	transcript	0.486577	0	Inf	0.0244032	0.89185	up
LNC_001285	XLOC_016659	Novel lncRNA	transcript	0.0321945	0.789946	-4.61687	0.0244326	0.892633	down
LNC_001072	XLOC_014635	Novel lncRNA	transcript	0.17995	4.05461	-4.4939	0.0246085	0.895797	down
LNC_004327	XLOC_075111	Novel lncRNA	transcript	0	0.844067	#NAME?	0.0247433	0.895797	down
LNC_004774	XLOC_082994	Novel lncRNA	transcript	0	1.65051	#NAME?	0.0248418	0.896288	down
LNC_004146	XLOC_071759	Novel lncRNA	transcript	1.2445	0.063583	4.29078	0.0250929	0.901605	up
LNC_008094	XLOC_152259	Novel lncRNA	transcript	0.349358	0	Inf	0.0251422	0.902724	up
LNC_005357	XLOC_092804	Novel lncRNA	transcript	0	0.142194	#NAME?	0.0254883	0.909653	down
LNC_001984	XLOC_031277	Novel lncRNA	transcript	0.869248	0	Inf	0.025523	0.909653	up
LNC_004556	XLOC_079009	Novel lncRNA	transcript	0.308026	0	Inf	0.0255593	0.909653	up
LNC_002624	XLOC_043263	Novel lncRNA	transcript	0.330758	0	Inf	0.0256367	0.909653	up
LNC_007030	XLOC_129021	Novel lncRNA	transcript	0.427959	0	Inf	0.025643	0.909653	up
LNC_007925	XLOC_149245	Novel lncRNA	transcript	2.02382	0.016584	6.93115	0.0258879	0.913295	up
LNC_008467	XLOC_159517	Novel lncRNA	transcript	0.190348	0	Inf	0.0259186	0.913295	up
LNC_004371	XLOC_075960	Novel lncRNA	transcript	0.624845	0.0083765	6.22101	0.0260856	0.916589	up
LNC_003548	XLOC_059988	Novel lncRNA	transcript	0	0.797611	#NAME?	0.0261755	0.918455	down
LNC_008670	XLOC_163494	Novel lncRNA	transcript	0	0.700057	#NAME?	0.0261779	0.918455	down
LNC_000147	XLOC_001433	Novel lncRNA	transcript	0.46637	0	Inf	0.0261884	0.918488	up
ENST00000534914.5	ENSG00000153363.12	LINC00467	transcript	0	0.491642	#NAME?	0.0264954	0.925901	down
LNC_003314	XLOC_055574	Novel lncRNA	transcript	0.217149	0	Inf	0.0269921	0.93307	up
LNC_003124	XLOC_051497	Novel lncRNA	transcript	0	0.98073	#NAME?	0.0271303	0.936724	down
LNC_008604	XLOC_161801	Novel lncRNA	transcript	0	0.494312	#NAME?	0.028414	0.958838	down
LNC_004090	XLOC_070805	Novel lncRNA	transcript	0.320387	0	Inf	0.0285312	0.962144	up
LNC_007379	XLOC_136392	Novel lncRNA	transcript	0.43926	0	Inf	0.0285849	0.963381	up
LNC_004369	XLOC_075960	Novel lncRNA	transcript	0	0.380472	#NAME?	0.0288845	0.968057	down
LNC_002571	XLOC_042118	Novel lncRNA	transcript	0	0.317611	#NAME?	0.028886	0.968057	down
LNC_002159	XLOC_034461	Novel lncRNA	transcript	0.495714	0	Inf	0.0290569	0.972906	up
LNC_005882	XLOC_105257	Novel lncRNA	transcript	0.0693175	0.644491	-3.21687	0.0292204	0.974763	down
LNC_003272	XLOC_055267	Novel lncRNA	transcript	0	0.582835	#NAME?	0.0293216	0.977138	down
LNC_003387	XLOC_056744	Novel lncRNA	transcript	0	1.4175	#NAME?	0.0293508	0.977363	down
LNC_000158	XLOC_001552	Novel lncRNA	transcript	0.500323	0	Inf	0.0296179	0.984111	up
LNC_006146	XLOC_110049	Novel lncRNA	transcript	0	0.792844	#NAME?	0.0297687	0.985787	down
LNC_000080	XLOC_000577	Novel lncRNA	transcript	0.778351	10.5091	-3.75508	0.0304554	0.996737	down
LNC_009606	XLOC_185918	Novel lncRNA	transcript	0	0.742189	#NAME?	0.0304915	0.996737	down
LNC_010005	XLOC_195929	Novel lncRNA	transcript	1.19737	0	Inf	0.0306562	0.996938	up
ENST00000605526.5	ENSG00000232593.6	KANTR	transcript	0	0.912084	#NAME?	0.0306951	0.997905	down
LNC_000318	XLOC_004105	Novel lncRNA	transcript	0.711962	0	Inf	0.0308065	0.999131	up
ENST00000419253.1	ENSG00000235954.6	TTC28-AS1	transcript	0.053852	1.30042	-4.59384	0.0308563	0.99998	down
LNC_006420	XLOC_115747	Novel lncRNA	transcript	0.0865545	1.64617	-4.24936	0.0311374	1	down
LNC_009885	XLOC_192439	Novel lncRNA	transcript	0.441818	0	Inf	0.0312241	1	up
LNC_005916	XLOC_105838	Novel lncRNA	transcript	0.345295	0	Inf	0.0312282	1	up
LNC_009347	XLOC_178737	Novel lncRNA	transcript	0.485274	0	Inf	0.0316047	1	up
LNC_004211	XLOC_072739	Novel lncRNA	transcript	0.028222	0.591109	-4.38853	0.0316665	1	down
LNC_004570	XLOC_079081	Novel lncRNA	transcript	0.382962	0	Inf	0.0317848	1	up
LNC_008508	XLOC_160523	Novel lncRNA	transcript	0.341935	0	Inf	0.0317881	1	up
LNC_003517	XLOC_059818	Novel lncRNA	transcript	0.0478	0.933728	-4.28792	0.0319333	1	down
LNC_009204	XLOC_174510	Novel lncRNA	transcript	0.328176	0	Inf	0.0321409	1	up
LNC_004478	XLOC_078198	Novel lncRNA	transcript	0	0.354535	#NAME?	0.0321796	1	down
ENST00000587944.5	ENSG00000237298.8	TTN-AS1	transcript	0	1.08838	#NAME?	0.032183	1	down
LNC_009776	XLOC_189531	Novel lncRNA	transcript	1.61618	0.120326	3.74758	0.0325975	1	up
LNC_003975	XLOC_068550	Novel lncRNA	transcript	0.0055235	0.415451	-6.23295	0.0326631	1	down
LNC_009234	XLOC_175480	Novel lncRNA	transcript	0	0.76293	#NAME?	0.0331415	1	down
LNC_004490	XLOC_078198	Novel lncRNA	transcript	0	0.47639	#NAME?	0.0331926	1	down
LNC_002351	XLOC_038397	Novel lncRNA	transcript	0.551469	0	Inf	0.0332264	1	up
LNC_003573	XLOC_060271	Novel lncRNA	transcript	0.0248355	0.799156	-5.008	0.03329	1	down
LNC_006891	XLOC_125809	Novel lncRNA	transcript	0.271212	0	Inf	0.0333516	1	up
LNC_003382	XLOC_056687	Novel lncRNA	transcript	0	0.79938	#NAME?	0.0334974	1	down
LNC_005836	XLOC_104255	Novel lncRNA	transcript	0	0.611329	#NAME?	0.0334998	1	down
ENST00000630520.2	ENSG00000179818.13	PCBP1-AS1	transcript	0.447916	0	Inf	0.0338803	1	up
LNC_004497	XLOC_078198	Novel lncRNA	transcript	0.684523	0.0031015	7.78599	0.0339173	1	up
LNC_006053	XLOC_108849	Novel lncRNA	transcript	0.614234	0	Inf	0.0340189	1	up
LNC_004481	XLOC_078198	Novel lncRNA	transcript	0.739608	0.032678	4.50037	0.034208	1	up
ENST00000442982.5	ENSG00000226752.7	PSMD5-AS1	transcript	1.01208	8.00446	-2.98349	0.0342168	1	down
LNC_009103	XLOC_172945	Novel lncRNA	transcript	0	0.365692	#NAME?	0.0343432	1	down
ENST00000606388.5	ENSG00000235652.7	RP11-545I5.3	transcript	0.189519	0	Inf	0.0349287	1	up
LNC_000617	XLOC_008149	Novel lncRNA	transcript	0	0.2856	#NAME?	0.0350794	1	down
ENST00000529938.1	ENSG00000250303.3	RP11-356J5.12	transcript	0.574697	0.011088	5.69573	0.0352622	1	up
LNC_001566	XLOC_022434	Novel lncRNA	transcript	0	0.350859	#NAME?	0.0353257	1	down
LNC_004033	XLOC_069285	Novel lncRNA	transcript	0.882572	0	Inf	0.0354254	1	up
ENST00000521696.1	ENSG00000253948.1	RP11-410L14.2	transcript	1.10172	0	Inf	0.0354299	1	up
ENST00000441331.1	ENSG00000228063.1	LYPLAL1-AS1	transcript	0	0.584178	#NAME?	0.035464	1	down
LNC_004051	XLOC_070154	Novel lncRNA	transcript	1.14547	0	Inf	0.0359073	1	up
LNC_008684	XLOC_163875	Novel lncRNA	transcript	0.039293	0.984339	-4.64681	0.0359477	1	down
LNC_004964	XLOC_085461	Novel lncRNA	transcript	1.35936	0	Inf	0.0363045	1	up
ENST00000606522.1	ENSG00000272097.1	RP11-421M1.8	transcript	0.395128	0	Inf	0.0363093	1	up
LNC_004651	XLOC_081494	Novel lncRNA	transcript	0.000146	0.306841	-11.0373	0.0365184	1	down
LNC_009694	XLOC_188502	Novel lncRNA	transcript	0.300698	0	Inf	0.036523	1	up
LNC_002005	XLOC_031441	Novel lncRNA	transcript	0.464	0	Inf	0.0365268	1	up
LNC_000764	XLOC_010718	Novel lncRNA	transcript	0.694212	0	Inf	0.0365305	1	up
LNC_004880	XLOC_083710	Novel lncRNA	transcript	0	0.51185	#NAME?	0.0365398	1	down
LNC_000899	XLOC_013555	Novel lncRNA	transcript	0.00577	0.424187	-6.19999	0.0368557	1	down
LNC_008514	XLOC_160523	Novel lncRNA	transcript	0.321395	0	Inf	0.0371744	1	up
LNC_000505	XLOC_006064	Novel lncRNA	transcript	1.93235	0.0712045	4.76224	0.0373807	1	up
LNC_000059	XLOC_000577	Novel lncRNA	transcript	13.7656	0.693723	4.31057	0.0377656	1	up
LNC_009129	XLOC_173344	Novel lncRNA	transcript	0.0440445	0.696136	-3.98233	0.0378886	1	down
LNC_003441	XLOC_057872	Novel lncRNA	transcript	0.0163745	0.402492	-4.61944	0.0380959	1	down
LNC_000326	XLOC_004131	Novel lncRNA	transcript	0.344786	0	Inf	0.0382208	1	up
LNC_008693	XLOC_164132	Novel lncRNA	transcript	0	0.16984	#NAME?	0.0383218	1	down
LNC_009359	XLOC_179479	Novel lncRNA	transcript	0.750401	0	Inf	0.0385366	1	up
LNC_008101	XLOC_152373	Novel lncRNA	transcript	0.404064	0	Inf	0.038537	1	up
ENST00000444362.2	ENSG00000224870.6	RP4-758J18.2	transcript	0.51832	0	Inf	0.0385977	1	up
LNC_001214	XLOC_015582	Novel lncRNA	transcript	0.571088	0	Inf	0.0389284	1	up
ENST00000418765.5	ENSG00000215190.8	LINC00680	transcript	2.44922	0.044178	5.79285	0.0390164	1	up
ENST00000455503.1	ENSG00000237976.1	RP11-126K1.6	transcript	0.590966	0	Inf	0.0391431	1	up
LNC_010084	XLOC_198138	Novel lncRNA	transcript	0	0.496007	#NAME?	0.0395256	1	down
LNC_005632	XLOC_100240	Novel lncRNA	transcript	0	0.705299	#NAME?	0.0395518	1	down
LNC_009258	XLOC_175899	Novel lncRNA	transcript	0.250043	0	Inf	0.03972	1	up
LNC_006432	XLOC_116031	Novel lncRNA	transcript	0.256619	0	Inf	0.0397286	1	up
LNC_004670	XLOC_082024	Novel lncRNA	transcript	0.601964	0	Inf	0.0397732	1	up
LNC_001000	XLOC_014635	Novel lncRNA	transcript	0.606391	0	Inf	0.0397802	1	up
LNC_006243	XLOC_111614	Novel lncRNA	transcript	0	0.143714	#NAME?	0.0398245	1	down
LNC_008878	XLOC_167961	Novel lncRNA	transcript	0.814179	0.0817955	3.31525	0.0401976	1	up
LNC_008024	XLOC_151101	Novel lncRNA	transcript	0.05759	0.977545	-4.08527	0.0406411	1	down
ENST00000483342.5	ENSG00000174365.19	SNHG11	transcript	0.524571	0.006067	6.43401	0.0408398	1	up
LNC_002688	XLOC_044246	Novel lncRNA	transcript	0.04967	0.644316	-3.69732	0.0414069	1	down
LNC_004567	XLOC_079073	Novel lncRNA	transcript	0.331807	0	Inf	0.0415037	1	up
LNC_010402	XLOC_205692	Novel lncRNA	transcript	0	0.536588	#NAME?	0.0423233	1	down
LNC_000160	XLOC_001611	Novel lncRNA	transcript	0.507273	0	Inf	0.0423327	1	up
LNC_008870	XLOC_167927	Novel lncRNA	transcript	0.936653	0	Inf	0.042337	1	up
LNC_002418	XLOC_039188	Novel lncRNA	transcript	0.421876	0	Inf	0.0423486	1	up
ENST00000480632.5	ENSG00000243836.5	WDR86-AS1	transcript	0.405776	4.00791	-3.30409	0.0424958	1	down
LNC_005290	XLOC_091163	Novel lncRNA	transcript	0.740931	0.0104125	6.15295	0.0425529	1	up
LNC_008809	XLOC_166298	Novel lncRNA	transcript	0	0.41521	#NAME?	0.0425854	1	down
LNC_000011	XLOC_000225	Novel lncRNA	transcript	1.17686	0.0605885	4.27975	0.0427586	1	up
LNC_007041	XLOC_129202	Novel lncRNA	transcript	0.242609	0	Inf	0.0431194	1	up
ENST00000564527.1	ENSG00000261616.1	RP11-6O2.3	transcript	0.091237	1.02758	-3.49348	0.0433543	1	down
ENST00000440026.1	ENSG00000214719.11	AC005562.1	transcript	0.436389	0	Inf	0.0437488	1	up
ENST00000594575.5	ENSG00000239665.8	RP11-295P9.3	transcript	0.952647	0	Inf	0.0437529	1	up
LNC_005289	XLOC_091163	Novel lncRNA	transcript	0	0.416983	#NAME?	0.0438942	1	down
LNC_006380	XLOC_114924	Novel lncRNA	transcript	0.0988545	1.40193	-3.82597	0.0441056	1	down
ENST00000587188.1	ENSG00000267575.6	CTC-459F4.3	transcript	0.474572	0	Inf	0.0445205	1	up
LNC_004519	XLOC_078627	Novel lncRNA	transcript	0.160121	0	Inf	0.0445703	1	up
LNC_002612	XLOC_043213	Novel lncRNA	transcript	0.027837	0.608027	-4.44906	0.0450188	1	down
LNC_000628	XLOC_008248	Novel lncRNA	transcript	0	0.587364	#NAME?	0.0453548	1	down
LNC_003192	XLOC_053692	Novel lncRNA	transcript	0	0.376213	#NAME?	0.0454861	1	down
LNC_008459	XLOC_159273	Novel lncRNA	transcript	0.618938	0	Inf	0.0458449	1	up
LNC_003757	XLOC_063850	Novel lncRNA	transcript	0	0.493006	#NAME?	0.0465314	1	down
LNC_006118	XLOC_109723	Novel lncRNA	transcript	0.57094	0	Inf	0.0468228	1	up
LNC_007987	XLOC_149839	Novel lncRNA	transcript	0.0941535	0.993703	-3.39973	0.0470944	1	down
LNC_002929	XLOC_047937	Novel lncRNA	transcript	0.797219	0.109762	2.86059	0.0471726	1	up
LNC_004678	XLOC_082065	Novel lncRNA	transcript	0.378805	0	Inf	0.0474095	1	up
ENST00000595815.1	ENSG00000273189.1	CTD-3148I10.15	transcript	5.58645	0.514617	3.44036	0.0478807	1	up
LNC_007495	XLOC_138907	Novel lncRNA	transcript	0	0.303561	#NAME?	0.0481229	1	down
LNC_006101	XLOC_109574	Novel lncRNA	transcript	0.441779	0	Inf	0.0483001	1	up
LNC_009551	XLOC_184880	Novel lncRNA	transcript	0.224495	0	Inf	0.048303	1	up
LNC_004972	XLOC_085664	Novel lncRNA	transcript	0.704156	0	Inf	0.0483076	1	up
LNC_001582	XLOC_022841	Novel lncRNA	transcript	0.405894	0	Inf	0.0483076	1	up
LNC_008732	XLOC_164710	Novel lncRNA	transcript	0.491208	0	Inf	0.0483102	1	up
ENST00000424116.6	ENSG00000233766.7	AC098617.1	transcript	0	0.756518	#NAME?	0.0485931	1	down
ENST00000421843.5	ENSG00000179818.13	PCBP1-AS1	transcript	0	0.56026	#NAME?	0.0485989	1	down
LNC_000998	XLOC_014635	Novel lncRNA	transcript	0.520925	0.061769	3.07612	0.0486684	1	up
LNC_002799	XLOC_046053	Novel lncRNA	transcript	0	0.428287	#NAME?	0.0488281	1	down
LNC_000701	XLOC_009594	Novel lncRNA	transcript	0.353693	0.0186095	4.24839	0.0493195	1	up
LNC_010152	XLOC_199967	Novel lncRNA	transcript	0.425891	0	Inf	0.0499093	1	up
