# Supplementary material for: RNA sequencing of CD4 T-cells reveals the relationships between lncRNA-mRNA co-expression in elite controller vs. HIV-positive infected patients
Source: PeerJ. 2020 Apr 21;8:e8911. doi: 10.7717/peerj.8911 (PMC7182024; doi:10.7717/peerj.8911)
Supplement: Table S7 [file peerj-08-8911-s011.xlsx]

## Sheet: Sheet1
	Top 50 hub-genes caculated with 12 algorithms												Interaction
	MCC	DMNC	MNC	Degree	EPC	BottleNeck	EcCentricity	Closeness	Radiality	Betweenness	Stress	ClusteringCoefficient
	RPL7	SRP54	RPL7	ATM	RPL7	ATM	ATM	ATM	ATM	ATM	ATM	ZNF281	AP2M1
	RPS2	SRP72	RPS2	MAPK8	ATM	MAPK8	MAPK8	MAPK8	MAPK8	MAPK8	MAPK8	FOSB	AP3B1
	RPS9	RPS3A	RPS9	RPL7	RPS2	KDM6A	HLA-A	KDM6A	KDM6A	AP3B1	AP3B1	CCAR1	ARID1B
	RPS3A	GFM1	RPS3A	RPS2	EFTUD2	AP3B1	KDM6A	HDAC6	HDAC6	IRF3	IRF3	SRP72	ATM
	SRP54	RPS2	EFTUD2	EFTUD2	RPS9	HDAC6	AP3B1	EP400	HLA-A	AP2M1	KDM6A	PUM1	CANX
	SRP72	RPS9	EP400	GFM1	RPS3A	HNRNPUL1	HDAC6	RPS2	HNRNPUL1	CANX	CANX	DPF2	EP400
	EFTUD2	EFTUD2	OCRL	RPS9	SRP54	IRF3	HNRNPUL1	RPL7	EP400	TRRAP	AP2M1	IMPDH1	GFM1
	EXOSC2	EXOSC2	MAPK8	RPS3A	GFM1	TUBB	IRF3	HNRNPUL1	SMC4	KDM6A	HNRNPUL1	MRPL37	GNG2
	GFM1	RPL7	SRP54	KDM6A	KDM6A	SRP54	GFM1	CANX	CANX	HNRNPUL1	TRRAP	MRPS27	HDAC6
	ATM	MATR3	SRP72	IRF3	SRP72	GFM1	CANX	HLA-A	AP3B1	TUBB	GFM1	PIK3C2B	HNRNPUL1
	MAPK8	HNRNPUL1	EXOSC2	EP400	MAPK8	CANX	TRRAP	SMC4	TRRAP	HDAC6	HDAC6	PLCD1	IRF3
	EP400	TXNL4A	ATM	SRP54	EXOSC2	TRRAP	TXNL4A	TRRAP	RARA	ACIN1	TUBB	SLMAP	KDM6A
	OCRL	PIK3C2B	KDM6A	TRRAP	HNRNPUL1	HLA-A	SMC4	IRF3	RPS2	GFM1	HLA-A	EXOSC2	MAPK8
	KDM6A	CCAR1	MAPK9	AP2M1	TXNL4A	ACIN1	SUPT5H	AP3B1	ZNF281	RPL7	RPS2	RPS9	MAPK9
	IRF3	PLCD1	GFM1	CANX	EP400	AP2M1	MAPK9	GFM1	USP1	SMC4	SMC4	STK24	RPL7
	PIP5K1A	PIP5K1A	PIP5K1A	OCRL	CANX	RPS3A	FLNB	EFTUD2	IRF3	SUPT5H	RPL7	CHD9	RPS2
	MAPK9	IRF3	TRRAP	MAPK9	IRF3	TXNL4A	RPS2	MAPK9	SPG7	HLA-A	ACIN1	RPS3A	RPS3A
	TRRAP	AP2M1	MATR3	TUBB	HDAC6	SMC4	EP400	SRP54	SUPT5H	EP400	EP400	RPS2	SMARCE1
	MATR3	ARID1B	HNRNPUL1	SRP72	MATR3	SUPT5H	USP1	SPG7	MAPK9	RPS2	SRP54	SRP54	SMC4
	HNRNPUL1	AP3B1	TXNL4A	EXOSC2	MAPK9	OCRL	GNG2	RPS3A	RPL7	MAPK9	OCRL	RPL7	SRP54
	AP2M1	MST4	PIK3C2B	PIP5K1A	SMC4	RPL7	PSME2	RARA	TXNL4A	OCRL	EFTUD2	OCRL	TRRAP
	TXNL4A	CHD9	CCAR1	MATR3	ARID1B	MAPK9	CASP10	SUPT5H	RIF1	SRP54	SUPT5H	PIP5K1A	TUBB
	CANX	STK24	PLCD1	HNRNPUL1	TRRAP	FLNB	ARID1B	USP1	TCOF1	FLNB	TXNL4A	EFTUD2	TXNL4A
	PIK3C2B	TUBB	IRF3	TXNL4A	SPG7	CCM2	RARA	TUBB	FLNB	GNG2	RPS3A	AP3B1	USP1
	TUBB	HDAC6	AP2M1	ARID1B	HLA-A	RPS2	NFATC2	RPS9	RHNO1	LRRFIP1	LRRFIP1	SPG7
	CCAR1	SMC4	ARID1B	HDAC6	CCAR1	EP400	RIF1	TXNL4A	RTEL1	MATR3	FLNB	MST4
	PLCD1	GNG2	AP3B1	SMC4	RARA	SMARCE1	TCOF1	ZNF281	SRP54	TXNL4A	MATR3	USP1
	ARID1B	SMARCE1	MST4	ACIN1	SMARCE1	USP1	SPG7	FLNB	GFM1	MST4	SPG7	CCM2
	HDAC6	SPG7	CHD9	AP3B1	CHD9	GNG2	CHD9	AP2M1	EFTUD2	RPS3A	MAPK9	CAP1
	ACIN1	USP1	STK24	MST4	TUBB	SLBP	ZNF281	ARID1B	TUBB	SPG7	ARID1B	NFATC2
	SMC4	CCM2	TUBB	GNG2	NFATC2	MST4	FOSB	RIF1	NFATC2	PSME2	PIP5K1A	MCRS1
	AP3B1	MCRS1	HDAC6	SMARCE1	MCRS1	PSME2	ABCC1	TCOF1	CASP10	EFTUD2	PSME2	HNRNPUL1
	MST4	CAP1	SMC4	SLBP	ZNF281	CASP10	RHNO1	GNG2	GNG2	USP1	SLBP	TXNL4A
	CHD9	NFATC2	GNG2	FLNB	ACIN1	LRRFIP1	RTEL1	NFATC2	ARID1B	SLBP	MST4	MATR3
	SLBP	ZNF281	SMARCE1	SUPT5H	USP1	EIF4G3	TUBB	RHNO1	FOSB	ARID1B	GNG2	ARID1B
	FLNB	FOSB	SPG7	PIK3C2B	AP3B1	MATR3	SRP54	RTEL1	RPS3A	CASK	RARA	EP400
	GNG2	IMPDH1	USP1	CCAR1	FOSB	ARID1B	ACIN1	CASP10	RPS9	TIMM50	CASK	MAPK9
	SUPT5H	PUM1	CCM2	PLCD1	GNG2	RARA	AP2M1	SRP72	CCAR1	CASP10	TIMM50	GFM1
	STK24	MRPL37	MCRS1	CHD9	EML4	NFATC2	RPS3A	ACIN1	AP2M1	PIP5K1A	USP1	GNG2
	SMARCE1	MRPS27	CAP1	STK24	SUPT5H	TIMM50	OCRL	EXOSC2	ACIN1	TCOF1	NLRX1	SMARCE1
	SPG7	SLMAP	NFATC2	SPG7	TIMM50	RIF1	RPL7	FOSB	SMARCE1	ZMYM3	FLII	KDM6A
	IKZF1	DPF2	ZNF281	USP1	FLNB	PIP5K1A	SMARCE1	MATR3	SRP72	MON2	SMARCE1	TRRAP
	USP1	EP400	FOSB	CCM2	SLBP	ZMYM3	SLBP	SMARCE1	EML4	NLRX1	CCM2	HDAC6
	EML4	OCRL	IMPDH1	MCRS1	AP2M1	CASK	MST4	CCAR1	SLBP	GSTM1	ZMYM3	SMC4
	CCM2	TRRAP	PUM1	CAP1	CCM2	TCOF1	LRRFIP1	OCRL	TIMM50	RPS6KA1	CASP10	AP2M1
	TIMM50	ATM	MRPL37	NFATC2	MRPL37	STK24	EIF4G3	SLBP	PSME2	RCC1	MON2	MAPK8
	EIF4G3	KDM6A	MRPS27	IKZF1	IKZF1	NLRX1	MATR3	EML4	EXOSC2	FLII	GSTM1	IRF3
	PSME2	MAPK9	SLMAP	EML4	MRPS27	MON2	TIMM50	MCRS1	MCRS1	SMARCE1	RPS6KA1	TUBB
	MCRS1	MAPK8	DPF2	TIMM50	MST4	USP25	ZMYM3	TIMM50	CHD9	RARA	RCC1	ATM
	CAP1	CANX	CANX	EIF4G3	OCRL	CNN2	CASK	PSME2	ZMYM3	CCM2	TCOF1	CANX
